# Supplementary material
Source: publisher figshare collection journal article supplement (https://gsapubs.figshare.com/ndownloader/files/25972904)
Supplement: Supplementary file 1 [file 25972904]

## Sheet: summary data
Summary of 40Ar/39Ar results
Sample	Unit	L#	Irrad	n
RC15-HWW-107	Lost Cabin	65078	NM-284C	19
RC15-HWW-107	Lost Cabin	65697	NM-290J	86
RC15-SW-95	Bullhead	65081	NM-284C	132
K17-BS-1	Bullhead	65735	NM-290N	72
K17-BS-1	Bullhead	65736	NM-290N	73
K17-BS-1	Bullhead	65737	NM-290N	86
RC16-HM-129	Bouse sand	65077	NM-284C	59
RC16-HM-129	Bouse sand	66650	NM-300B	52
KLC-16-PV-2	Bouse sand	64986	NM-283G	104
KLC18-Riv2-Cr	Bouse sand	66296	NM-294L	178
KLC18-Riv2-Cr	Bouse sand	66662	NM-300B	141	534
04PW30	Wind Caves	66649	NM-300A	57
RC18-SMSE-208	Bullhead	67070	NM-304D	201
Summary of dates for Maximum Depositoin Age
RC15-HWW-107		Age	±1s
		4.27043	0.869711
		4.73918	0.350576
		4.74073	0.275061
		4.97259	0.631804
		4.94422	0.593245
		4.99048	0.227927
		5.02472	0.754461
		5.23262	0.107859
		5.22105	0.284505
		5.31295	0.0958746
		5.24628	0.203764
		5.38843	0.0923276
		5.33201	0.137586
		5.42804	0.0729937
		5.44746	0.080724
		5.49005	0.138768
		5.70608	0.834074
		5.68385	0.413063
		5.78914	0.460292
	Weighted Mean ±2s	5.35318	0.0726651
	MSWD	1.13
	n of n	19 of 151
RC15-SW-95	Youngest grain ±2s	4.51065	0.0428222
	n fo n	1 of 132
K17-BS-1		4.60919	0.0073467
		4.63873	0.00929
		4.59262	0.0116995
	Weighted Mean ±2s	4.6151	0.0240379
	MSWD	5.41
	n of n	3 of 231
RC16-HM-129	Youngest grain ±2s	4.9588	0.404518
	n fo n	1 of 111
KLC-16-PV-2-Cr	Youngest grain ±2s	5.31909	0.15838
	n fo n	1 of 104
KLC18-Riv2-Cr	Youngest grain ±2s	4.41068	0.407217
	n fo n	1 of 319
04PW30		4.49161	0.0691623
		4.54762	0.0329174
		4.54901	0.0539169
		4.583	0.0394479
		4.60178	0.0565763
	Weighted Mean ±2s	4.55931	0.040564
	MSWD	0.51
	n of n	5 of 57
RC18-SMSE-208		4.09066	0.241411
		4.30102	0.0710291
		4.3167	0.0577697
	Weighted Mean ±2s	4.30313	0.0881297
	MSWD	0.42
	n of n	3 of 201
Notes:
L# = lab identifier
Irrad = Irradiaiton identifier
n = number of grains run per L#
n of n = number of grains used for MDA of total grains analyzed
text in red records dates determined in USGS-Menlo laboratory

## Sheet: data
	ID	Power	40Ar/39Ar	37Ar/39Ar	36Ar/39Ar	39ArK	K/Ca	40Ar*	Age	±1s	Ar36_ICFactorEr								Run_ID	Sample	System	Run_Date	Run_Hour	Run_SecSince1904	PrincipalInvestigator	Material	Hole #	Project	Locality	File	Version	History	Comment	Fit_Type	Signal Norm.	Run Script	Fract_Deliv_To_MS	Heating_Dev	Pwr_Requested	Pwr_Achieved	Pwr_AchievedSD	Pwr_AchievedMax	OP_Temp	Tot_Dur_Heating	Dur_Heating_At_Req_Pwr	Holes	X_Y_Pos	Laser Scan File	Beam_Dia
		(watts)			(x 10-3)	(x 10-15 mol)		(%)	(Ma)	(Ma)
	RC15-HWW-107, Sanidine, J=0.0039455±0.02%, IC=1.023121±0.0016219, NM-284C, Lab#=65078, Argus VI
	09	4	3.91716	1.80377	11.3705	0.0621001	0.282855	17.6125	4.97259	0.631804	0.0016219								65078-09	RC15-HWW-107	37	2016-07-15	21.9833	3551465000	RCrow	Sanidine	14	IR962		129.138.12.160	7.875	Ar40 bk val,er = @ 7/19/16 2:49 PM; Parabolic @ 7/19/16 2:49 PM; Ar39 bk val,er = @ 7/19/16 2:49 PM; Average background @ 7/19/16 2:49 PM; Ar38 bk val,er = @ 7/19/16 2:49 PM; Average background @ 7/19/16 2:49 PM; Ar37 bk val,er = @ 7/19/16 2:49 PM; Average background @ 7/19/16 2:49 PM; Ar36 bk val,er = @ 7/19/16 2:49 PM; Parabolic @ 7/19/16 2:49 PM; Detector intercalibration obtained from Weighte…	C14:284	LPPLLPAAAAAA	1	Pychron Script	1	Fusions CO2	4	4	0	4	0	30	30	145			0
	19	4	0.799703	0.0097465	0.1069	0.245384	52.3474	96.1024	5.49005	0.138768	0.0016219								65078-19	RC15-HWW-107	37	2016-07-16	0.116667	3551472000	RCrow	Sanidine	14	IR962		129.138.12.160	7.875	Ar40 bk val,er = @ 7/19/16 2:49 PM; Parabolic @ 7/19/16 2:49 PM; Ar39 bk val,er = @ 7/19/16 2:49 PM; Average background @ 7/19/16 2:49 PM; Ar38 bk val,er = @ 7/19/16 2:49 PM; Average background @ 7/19/16 2:49 PM; Ar37 bk val,er = @ 7/19/16 2:49 PM; Average background @ 7/19/16 2:49 PM; Ar36 bk val,er = @ 7/19/16 2:49 PM; Parabolic @ 7/19/16 2:49 PM; Detector intercalibration obtained from Weighte…	C14:284	LPPLLPAAAAAA	1	Pychron Script	1	Fusions CO2	4	4	0	4	0	30	30	155			0
	16	4	1.0146	0.0352979	0.511	0.16249	14.4542	85.2732	6.19181	0.212431	0.0016219								65078-16	RC15-HWW-107	37	2016-07-15	23.3667	3551470000	RCrow	Sanidine	14	IR962		129.138.12.160	7.875	Ar40 bk val,er = @ 7/19/16 2:49 PM; Parabolic @ 7/19/16 2:49 PM; Ar39 bk val,er = @ 7/19/16 2:49 PM; Average background @ 7/19/16 2:49 PM; Ar38 bk val,er = @ 7/19/16 2:49 PM; Average background @ 7/19/16 2:49 PM; Ar37 bk val,er = @ 7/19/16 2:49 PM; Average background @ 7/19/16 2:49 PM; Ar36 bk val,er = @ 7/19/16 2:49 PM; Parabolic @ 7/19/16 2:49 PM; Detector intercalibration obtained from Weighte…	C14:284	LPPLLPAAAAAA	1	Pychron Script	1	Fusions CO2	4	4	0	4	0	30	30	152			0
	15	4	1.76011	0.0113744	0.1282	0.602621	44.8555	97.8878	12.3485	0.0585481	0.0016219								65078-15	RC15-HWW-107	37	2016-07-15	23.1667	3551469000	RCrow	Sanidine	14	IR962		129.138.12.160	7.875	Ar40 bk val,er = @ 7/19/16 2:49 PM; Parabolic @ 7/19/16 2:49 PM; Ar39 bk val,er = @ 7/19/16 2:49 PM; Average background @ 7/19/16 2:49 PM; Ar38 bk val,er = @ 7/19/16 2:49 PM; Average background @ 7/19/16 2:49 PM; Ar37 bk val,er = @ 7/19/16 2:49 PM; Average background @ 7/19/16 2:49 PM; Ar36 bk val,er = @ 7/19/16 2:49 PM; Parabolic @ 7/19/16 2:49 PM; Detector intercalibration obtained from Weighte…	C14:284	LPPLLPAAAAAA	1	Pychron Script	1	Fusions CO2	4	4	0	4	0	30	30	151			0
	07	4	2.2975	0.0106659	0.4075	0.886738	47.8351	94.7764	15.6081	0.0432369	0.0016219								65078-07	RC15-HWW-107	37	2016-07-15	21.3333	3551462000	RCrow	Sanidine	14	IR962		129.138.12.160	7.875	Ar40 bk val,er = @ 7/19/16 2:49 PM; Parabolic @ 7/19/16 2:49 PM; Ar39 bk val,er = @ 7/19/16 2:49 PM; Average background @ 7/19/16 2:49 PM; Ar38 bk val,er = @ 7/19/16 2:49 PM; Average background @ 7/19/16 2:49 PM; Ar37 bk val,er = @ 7/19/16 2:49 PM; Average background @ 7/19/16 2:49 PM; Ar36 bk val,er = @ 7/19/16 2:49 PM; Parabolic @ 7/19/16 2:49 PM; Detector intercalibration obtained from Weighte…	C14:284	LPPLLPAAAAAA	1	Pychron Script	1	Fusions CO2	4	4	0	4	0	30	30	143			0
	11	4	2.39626	0.0099369	0.3651	0.416671	51.3444	95.5149	16.4045	0.0880916	0.0016219								65078-11	RC15-HWW-107	37	2016-07-15	22.4167	3551466000	RCrow	Sanidine	14	IR962		129.138.12.160	7.875	Ar40 bk val,er = @ 7/19/16 2:49 PM; Parabolic @ 7/19/16 2:49 PM; Ar39 bk val,er = @ 7/19/16 2:49 PM; Average background @ 7/19/16 2:49 PM; Ar38 bk val,er = @ 7/19/16 2:49 PM; Average background @ 7/19/16 2:49 PM; Ar37 bk val,er = @ 7/19/16 2:49 PM; Average background @ 7/19/16 2:49 PM; Ar36 bk val,er = @ 7/19/16 2:49 PM; Parabolic @ 7/19/16 2:49 PM; Detector intercalibration obtained from Weighte…	C14:284	LPPLLPAAAAAA	1	Pychron Script	1	Fusions CO2	4	4	0	4	0	30	30	147			0
	18	4	2.33932	0.0093482	0.1294	0.920484	54.5778	98.3908	16.4953	0.0391061	0.0016219								65078-18	RC15-HWW-107	37	2016-07-15	23.9	3551472000	RCrow	Sanidine	14	IR962		129.138.12.160	7.875	Ar40 bk val,er = @ 7/19/16 2:49 PM; Parabolic @ 7/19/16 2:49 PM; Ar39 bk val,er = @ 7/19/16 2:49 PM; Average background @ 7/19/16 2:49 PM; Ar38 bk val,er = @ 7/19/16 2:49 PM; Average background @ 7/19/16 2:49 PM; Ar37 bk val,er = @ 7/19/16 2:49 PM; Average background @ 7/19/16 2:49 PM; Ar36 bk val,er = @ 7/19/16 2:49 PM; Parabolic @ 7/19/16 2:49 PM; Detector intercalibration obtained from Weighte…	C14:284	LPPLLPAAAAAA	1	Pychron Script	1	Fusions CO2	4	4	0	4	0	30	30	154			0
	05	4	2.77661	0.0250488	1.4441	0.0607258	20.3684	84.6562	16.8528	0.578724	0.0016219								65078-05	RC15-HWW-107	37	2016-07-15	20.9167	3551461000	RCrow	Sanidine	14	IR962		129.138.12.160	7.875	Ar40 bk val,er = @ 7/19/16 2:49 PM; Parabolic @ 7/19/16 2:49 PM; Ar39 bk val,er = @ 7/19/16 2:49 PM; Average background @ 7/19/16 2:49 PM; Ar38 bk val,er = @ 7/19/16 2:49 PM; Average background @ 7/19/16 2:49 PM; Ar37 bk val,er = @ 7/19/16 2:49 PM; Average background @ 7/19/16 2:49 PM; Ar36 bk val,er = @ 7/19/16 2:49 PM; Parabolic @ 7/19/16 2:49 PM; Detector intercalibration obtained from Weighte…	C14:284	LPPLLPAAAAAA	1	Pychron Script	1	Fusions CO2	4	4	0	4	0	30	30	141			0
	04	4	2.80877	0.0198526	1.5508	0.568481	25.6996	83.6952	16.8549	0.0755128	0.0016219								65078-04	RC15-HWW-107	37	2016-07-15	20.7	3551460000	RCrow	Sanidine	14	IR962		129.138.12.160	7.875	Ar40 bk val,er = @ 7/19/16 2:49 PM; Parabolic @ 7/19/16 2:49 PM; Ar39 bk val,er = @ 7/19/16 2:49 PM; Average background @ 7/19/16 2:49 PM; Ar38 bk val,er = @ 7/19/16 2:49 PM; Average background @ 7/19/16 2:49 PM; Ar37 bk val,er = @ 7/19/16 2:49 PM; Average background @ 7/19/16 2:49 PM; Ar36 bk val,er = @ 7/19/16 2:49 PM; Parabolic @ 7/19/16 2:49 PM; Detector intercalibration obtained from Weighte…	C14:284	LPPLLPAAAAAA	1	Pychron Script	1	Fusions CO2	4	4	0	4	0	30	30	140			0
	03	4	2.66291	0.0221739	0.7832	0.420409	23.0092	91.3485	17.4355	0.0906287	0.0016219								65078-03	RC15-HWW-107	37	2016-07-15	20.4833	3551459000	RCrow	Sanidine	14	IR962		129.138.12.160	7.875	Ar40 bk val,er = @ 7/19/16 2:49 PM; Parabolic @ 7/19/16 2:49 PM; Ar39 bk val,er = @ 7/19/16 2:49 PM; Average background @ 7/19/16 2:49 PM; Ar38 bk val,er = @ 7/19/16 2:49 PM; Average background @ 7/19/16 2:49 PM; Ar37 bk val,er = @ 7/19/16 2:49 PM; Average background @ 7/19/16 2:49 PM; Ar36 bk val,er = @ 7/19/16 2:49 PM; Parabolic @ 7/19/16 2:49 PM; Detector intercalibration obtained from Weighte…	C14:284	LPPLLPAAAAAA	1	Pychron Script	1	Fusions CO2	4	4	0	4	0	30	30	139			0
	08	4	2.72164	0.0267271	0.9572	0.754656	19.0894	89.6535	17.4903	0.0545468	0.0016219								65078-08	RC15-HWW-107	37	2016-07-15	21.7667	3551464000	RCrow	Sanidine	14	IR962		129.138.12.160	7.875	Ar40 bk val,er = @ 7/19/16 2:49 PM; Parabolic @ 7/19/16 2:49 PM; Ar39 bk val,er = @ 7/19/16 2:49 PM; Average background @ 7/19/16 2:49 PM; Ar38 bk val,er = @ 7/19/16 2:49 PM; Average background @ 7/19/16 2:49 PM; Ar37 bk val,er = @ 7/19/16 2:49 PM; Average background @ 7/19/16 2:49 PM; Ar36 bk val,er = @ 7/19/16 2:49 PM; Parabolic @ 7/19/16 2:49 PM; Detector intercalibration obtained from Weighte…	C14:284	LPPLLPAAAAAA	1	Pychron Script	1	Fusions CO2	4	4	0	4	0	30	30	144			0
	01	4	3.05998	0.0248931	2.0854	0.968918	20.4958	79.874	17.5248	0.0520555	0.0016219								65078-01	RC15-HWW-107	37	2016-07-15	20.05	3551458000	RCrow	Sanidine	14	IR962		129.138.12.160	7.875	Ar40 bk val,er = @ 7/19/16 2:49 PM; Parabolic @ 7/19/16 2:49 PM; Ar39 bk val,er = @ 7/19/16 2:49 PM; Average background @ 7/19/16 2:49 PM; Ar38 bk val,er = @ 7/19/16 2:49 PM; Average background @ 7/19/16 2:49 PM; Ar37 bk val,er = @ 7/19/16 2:49 PM; Average background @ 7/19/16 2:49 PM; Ar36 bk val,er = @ 7/19/16 2:49 PM; Parabolic @ 7/19/16 2:49 PM; Detector intercalibration obtained from Weighte…	C14:284	LPPLLPAAAAAA	1	Pychron Script	1	Fusions CO2	4	4	0	4	0	30	30	137			0
	02	4	2.67516	0.0233493	0.7726	0.533425	21.8509	91.5089	17.5462	0.0721212	0.0016219								65078-02	RC15-HWW-107	37	2016-07-15	20.2667	3551459000	RCrow	Sanidine	14	IR962		129.138.12.160	7.875	Ar40 bk val,er = @ 7/19/16 2:49 PM; Parabolic @ 7/19/16 2:49 PM; Ar39 bk val,er = @ 7/19/16 2:49 PM; Average background @ 7/19/16 2:49 PM; Ar38 bk val,er = @ 7/19/16 2:49 PM; Average background @ 7/19/16 2:49 PM; Ar37 bk val,er = @ 7/19/16 2:49 PM; Average background @ 7/19/16 2:49 PM; Ar36 bk val,er = @ 7/19/16 2:49 PM; Parabolic @ 7/19/16 2:49 PM; Detector intercalibration obtained from Weighte…	C14:284	LPPLLPAAAAAA	1	Pychron Script	1	Fusions CO2	4	4	0	4	0	30	30	138			0
	10	4	2.47502	0.0198453	0.0809	0.212756	25.7091	99.0921	17.5746	0.160383	0.0016219								65078-10	RC15-HWW-107	37	2016-07-15	22.2	3551466000	RCrow	Sanidine	14	IR962		129.138.12.160	7.875	Ar40 bk val,er = @ 7/19/16 2:49 PM; Parabolic @ 7/19/16 2:49 PM; Ar39 bk val,er = @ 7/19/16 2:49 PM; Average background @ 7/19/16 2:49 PM; Ar38 bk val,er = @ 7/19/16 2:49 PM; Average background @ 7/19/16 2:49 PM; Ar37 bk val,er = @ 7/19/16 2:49 PM; Average background @ 7/19/16 2:49 PM; Ar36 bk val,er = @ 7/19/16 2:49 PM; Parabolic @ 7/19/16 2:49 PM; Detector intercalibration obtained from Weighte…	C14:284	LPPLLPAAAAAA	1	Pychron Script	1	Fusions CO2	4	4	0	4	0	30	30	146			0
	12	4	2.58942	0.0480667	0.2791	0.212418	10.6145	96.9479	17.9898	0.165384	0.0016219								65078-12	RC15-HWW-107	37	2016-07-15	22.6333	3551467000	RCrow	Sanidine	14	IR962		129.138.12.160	7.875	Ar40 bk val,er = @ 7/19/16 2:49 PM; Parabolic @ 7/19/16 2:49 PM; Ar39 bk val,er = @ 7/19/16 2:49 PM; Average background @ 7/19/16 2:49 PM; Ar38 bk val,er = @ 7/19/16 2:49 PM; Average background @ 7/19/16 2:49 PM; Ar37 bk val,er = @ 7/19/16 2:49 PM; Average background @ 7/19/16 2:49 PM; Ar36 bk val,er = @ 7/19/16 2:49 PM; Parabolic @ 7/19/16 2:49 PM; Detector intercalibration obtained from Weighte…	C14:284	LPPLLPAAAAAA	1	Pychron Script	1	Fusions CO2	4	4	0	4	0	30	30	148			0
	13	4	3.36291	0.053309	0.3115	0.158522	9.57069	97.3784	23.448	0.222246	0.0016219								65078-13	RC15-HWW-107	37	2016-07-15	22.85	3551468000	RCrow	Sanidine	14	IR962		129.138.12.160	7.875	Ar40 bk val,er = @ 7/19/16 2:49 PM; Parabolic @ 7/19/16 2:49 PM; Ar39 bk val,er = @ 7/19/16 2:49 PM; Average background @ 7/19/16 2:49 PM; Ar38 bk val,er = @ 7/19/16 2:49 PM; Average background @ 7/19/16 2:49 PM; Ar37 bk val,er = @ 7/19/16 2:49 PM; Average background @ 7/19/16 2:49 PM; Ar36 bk val,er = @ 7/19/16 2:49 PM; Parabolic @ 7/19/16 2:49 PM; Detector intercalibration obtained from Weighte…	C14:284	LPPLLPAAAAAA	1	Pychron Script	1	Fusions CO2	4	4	0	4	0	30	30	149			0
	20	4	3.48233	0.0509254	-0.1275	0.0955381	10.0187	101.196	25.2224	0.363723	0.0016219								65078-20	RC15-HWW-107	37	2016-07-16	0.333333	3551473000	RCrow	Sanidine	14	IR962		129.138.12.160	7.875	Ar40 bk val,er = @ 7/19/16 2:50 PM; Parabolic @ 7/19/16 2:50 PM; Ar39 bk val,er = @ 7/19/16 2:50 PM; Average background @ 7/19/16 2:50 PM; Ar38 bk val,er = @ 7/19/16 2:50 PM; Average background @ 7/19/16 2:50 PM; Ar37 bk val,er = @ 7/19/16 2:50 PM; Average background @ 7/19/16 2:50 PM; Ar36 bk val,er = @ 7/19/16 2:50 PM; Parabolic @ 7/19/16 2:50 PM; Detector intercalibration obtained from Weighte…	C14:284	LPPLLPAAAAAA	1	Pychron Script	1	Fusions CO2	4	4	0	4	0	30	30	156			0
	06	4	10.4143	0.0048558	0.0847	0.58596	105.071	99.7628	73.4872	0.0858942	0.0016219								65078-06	RC15-HWW-107	37	2016-07-15	21.1333	3551462000	RCrow	Sanidine	14	IR962		129.138.12.160	7.875	Ar40 bk val,er = @ 7/19/16 2:49 PM; Parabolic @ 7/19/16 2:49 PM; Ar39 bk val,er = @ 7/19/16 2:49 PM; Average background @ 7/19/16 2:49 PM; Ar38 bk val,er = @ 7/19/16 2:49 PM; Average background @ 7/19/16 2:49 PM; Ar37 bk val,er = @ 7/19/16 2:49 PM; Average background @ 7/19/16 2:49 PM; Ar36 bk val,er = @ 7/19/16 2:49 PM; Parabolic @ 7/19/16 2:49 PM; Detector intercalibration obtained from Weighte…	C14:284	LPPLLPAAAAAA	1	Pychron Script	1	Fusions CO2	4	4	0	4	0	30	30	142			0
	21	4	186.155	0.0046503	0.1615	1.16627	109.714	99.9745	1007.84	1.86098	0.0016219								65078-21	RC15-HWW-107	37	2016-07-16	0.416667	3551474000	RCrow	Sanidine	14	IR962		129.138.12.160	7.875	Ar40 bk val,er = @ 7/19/16 2:50 PM; Parabolic @ 7/19/16 2:50 PM; Ar39 bk val,er = @ 7/19/16 2:50 PM; Average background @ 7/19/16 2:50 PM; Ar38 bk val,er = @ 7/19/16 2:50 PM; Average background @ 7/19/16 2:50 PM; Ar37 bk val,er = @ 7/19/16 2:50 PM; Average background @ 7/19/16 2:50 PM; Ar36 bk val,er = @ 7/19/16 2:50 PM; Parabolic @ 7/19/16 2:50 PM; Detector intercalibration obtained from Weighte…	C14:284	LPPLLPAAAAAA	1	Pychron Script	1	Fusions CO2	4	4	0	4	0	30	30	157			0
				n=19
	RC15-HWW-107, Sanidine, J=0.00281±0.02%, IC=0.9925498±0.0031037, NM-290J, Lab#=65697, Argus VI
	108	4.5	1.16208	0.0155875	0.4598	0.167005	32.7316	88.3336	5.23262	0.107859	0.0031037								65697-108	RC15-HWW-107	37	2017-06-26	10.4833	3581318000	RCrow	Sanidine	29	IR962		129.138.12.160	7.875	H2 Baseline = A @ 6/26/17 4:52 PM; H1 Baseline = A @ 6/26/17 4:52 PM; AX Baseline = A @ 6/26/17 4:52 PM; L1 Baseline = A @ 6/26/17 4:52 PM; L2 Baseline = A @ 6/26/17 4:52 PM; Ar40 = L @ 6/26/17 4:52 PM; Ar39 = L @ 6/26/17 4:52 PM; Ar38 = L @ 6/26/17 4:52 PM; Ar37 = L @ 6/26/17 4:52 PM; Ar36 = L @ 6/26/17 4:52 PM; H2 Baseline = A @ 6/26/17 4:56 PM; H1 Baseline = A @ 6/26/17 4:56 PM; AX Baseline = …	J:29	LPPLLPAAAAAA	1	Pychron Script	1	Fusions CO2	4.5	0	0	0	0	30	30	117			0
	37	4.5	1.12857	-0.0001404	0.2889	0.184246	-	92.3768	5.31295	0.0958746	0.0031037								65697-37	RC15-HWW-107	37	2017-06-25	23.3333	3581278000	RCrow	Sanidine	29	IR962		129.138.12.160	7.875	H2 Baseline = A @ 6/26/17 4:49 PM; H1 Baseline = A @ 6/26/17 4:49 PM; AX Baseline = A @ 6/26/17 4:49 PM; L1 Baseline = A @ 6/26/17 4:49 PM; L2 Baseline = A @ 6/26/17 4:49 PM; Ar40 = P @ 6/26/17 4:49 PM; Ar39 = P @ 6/26/17 4:49 PM; Ar38 = L @ 6/26/17 4:49 PM; Ar37 = L @ 6/26/17 4:49 PM; Ar36 = P @ 6/26/17 4:49 PM; H2 Baseline = A @ 6/26/17 4:51 PM; H1 Baseline = A @ 6/26/17 4:51 PM; AX Baseline = …	J:29	LPPLLPAAAAAA	1	Pychron Script	1	Fusions CO2	4.5	0	0	0	0	30	30	44			0
	14	4.5	1.17905	0.0073676	0.4119	0.186001	69.2497	89.6492	5.38843	0.0923276	0.0031037								65697-14	RC15-HWW-107	37	2017-06-25	19.6833	3581264000	RCrow	Sanidine	29	IR962		129.138.12.160	7.875	H2 Baseline = A @ 6/26/17 4:49 PM; H1 Baseline = A @ 6/26/17 4:49 PM; AX Baseline = A @ 6/26/17 4:49 PM; L1 Baseline = A @ 6/26/17 4:49 PM; L2 Baseline = A @ 6/26/17 4:49 PM; Ar40 = P @ 6/26/17 4:49 PM; Ar39 = P @ 6/26/17 4:49 PM; Ar38 = L @ 6/26/17 4:49 PM; Ar37 = L @ 6/26/17 4:49 PM; Ar36 = P @ 6/26/17 4:49 PM; H2 Baseline = A @ 6/26/17 4:51 PM; H1 Baseline = A @ 6/26/17 4:51 PM; AX Baseline = …	J:29	LPPLLPAAAAAA	1	Pychron Script	1	Fusions CO2	4.5	0	0	0	0	30	30	21			0
	94	4.5	1.1099	0.0039516	0.1509	0.250259	129.113	95.9809	5.42804	0.0729937	0.0031037								65697-94	RC15-HWW-107	37	2017-06-26	8.7	3581311000	RCrow	Sanidine	29	IR962		129.138.12.160	7.875	H2 Baseline = A @ 6/26/17 4:52 PM; H1 Baseline = A @ 6/26/17 4:52 PM; AX Baseline = A @ 6/26/17 4:52 PM; L1 Baseline = A @ 6/26/17 4:52 PM; L2 Baseline = A @ 6/26/17 4:52 PM; Ar40 = L @ 6/26/17 4:52 PM; Ar39 = L @ 6/26/17 4:52 PM; Ar38 = L @ 6/26/17 4:52 PM; Ar37 = L @ 6/26/17 4:52 PM; Ar36 = L @ 6/26/17 4:52 PM; H2 Baseline = A @ 6/26/17 4:56 PM; H1 Baseline = A @ 6/26/17 4:56 PM; AX Baseline = …	J:29	LPPLLPAAAAAA	1	Pychron Script	1	Fusions CO2	4.5	0	0	0	0	30	30	103			0
	106	4.5	1.17522	0.0296337	0.3662	0.224021	17.217	90.9288	5.44746	0.080724	0.0031037								65697-106	RC15-HWW-107	37	2017-06-26	10.1833	3581317000	RCrow	Sanidine	29	IR962		129.138.12.160	7.875	H2 Baseline = A @ 6/26/17 4:52 PM; H1 Baseline = A @ 6/26/17 4:52 PM; AX Baseline = A @ 6/26/17 4:52 PM; L1 Baseline = A @ 6/26/17 4:52 PM; L2 Baseline = A @ 6/26/17 4:52 PM; Ar40 = L @ 6/26/17 4:52 PM; Ar39 = L @ 6/26/17 4:52 PM; Ar38 = L @ 6/26/17 4:52 PM; Ar37 = L @ 6/26/17 4:52 PM; Ar36 = L @ 6/26/17 4:52 PM; H2 Baseline = A @ 6/26/17 4:56 PM; H1 Baseline = A @ 6/26/17 4:56 PM; AX Baseline = …	J:29	LPPLLPAAAAAA	1	Pychron Script	1	Fusions CO2	4.5	0	0	0	0	30	30	115			0
	95	4.5	1.18867	0.0095053	0.2396	0.0209035	53.6757	94.1678	5.70608	0.834074	0.0031037								65697-95	RC15-HWW-107	37	2017-06-26	8.91667	3581312000	RCrow	Sanidine	29	IR962		129.138.12.160	7.875	H2 Baseline = A @ 6/26/17 4:52 PM; H1 Baseline = A @ 6/26/17 4:52 PM; AX Baseline = A @ 6/26/17 4:52 PM; L1 Baseline = A @ 6/26/17 4:52 PM; L2 Baseline = A @ 6/26/17 4:52 PM; Ar40 = L @ 6/26/17 4:52 PM; Ar39 = L @ 6/26/17 4:52 PM; Ar38 = L @ 6/26/17 4:52 PM; Ar37 = L @ 6/26/17 4:52 PM; Ar36 = L @ 6/26/17 4:52 PM; H2 Baseline = A @ 6/26/17 4:56 PM; H1 Baseline = A @ 6/26/17 4:56 PM; AX Baseline = …	J:29	LPPLLPAAAAAA	1	Pychron Script	1	Fusions CO2	4.5	0	0	0	0	30	30	104			0
	57	4.5	1.32865	0.007376	0.2308	0.469045	69.1708	94.8791	6.43	0.037201	0.0031037								65697-57	RC15-HWW-107	37	2017-06-26	2.65	3581290000	RCrow	Sanidine	29	IR962		129.138.12.160	7.875	H2 Baseline = A @ 6/26/17 4:50 PM; H1 Baseline = A @ 6/26/17 4:50 PM; AX Baseline = A @ 6/26/17 4:50 PM; L1 Baseline = A @ 6/26/17 4:50 PM; L2 Baseline = A @ 6/26/17 4:50 PM; Ar40 = L @ 6/26/17 4:50 PM; Ar39 = L @ 6/26/17 4:50 PM; Ar38 = L @ 6/26/17 4:50 PM; Ar37 = L @ 6/26/17 4:50 PM; Ar36 = L @ 6/26/17 4:50 PM; H2 Baseline = A @ 6/26/17 4:56 PM; H1 Baseline = A @ 6/26/17 4:56 PM; AX Baseline = …		LPPLLPAAAAAA	1	Pychron Script	1	Fusions CO2	4.5	0	0	0	0	30	30	64			0
	07	4.5	3.00986	0.0297247	0.1162	0.844472	17.1643	98.9354	15.2092	0.0166059	0.0031037								65697-07	RC15-HWW-107	37	2017-06-25	17.9833	3581258000	RCrow	Sanidine	29	IR962		129.138.12.160	7.875	H2 Baseline = A @ 6/26/17 4:49 PM; H1 Baseline = A @ 6/26/17 4:49 PM; AX Baseline = A @ 6/26/17 4:49 PM; L1 Baseline = A @ 6/26/17 4:49 PM; L2 Baseline = A @ 6/26/17 4:49 PM; Ar40 = P @ 6/26/17 4:49 PM; Ar39 = P @ 6/26/17 4:49 PM; Ar38 = L @ 6/26/17 4:49 PM; Ar37 = L @ 6/26/17 4:49 PM; Ar36 = P @ 6/26/17 4:49 PM; H2 Baseline = A @ 6/26/17 4:51 PM; H1 Baseline = A @ 6/26/17 4:51 PM; AX Baseline = …	J:29	LLLLLLAAAAAA	1	Pychron Script	1	Fusions CO2	4.5	0	0	0	0	30	30	14			0
	10	4.5	2.99901	0.0283662	0.0688	0.775278	17.9863	99.3962	15.2247	0.0180001	0.0031037								65697-10	RC15-HWW-107	37	2017-06-25	18.6167	3581261000	RCrow	Sanidine	29	IR962		129.138.12.160	7.875	H2 Baseline = A @ 6/26/17 4:49 PM; H1 Baseline = A @ 6/26/17 4:49 PM; AX Baseline = A @ 6/26/17 4:49 PM; L1 Baseline = A @ 6/26/17 4:49 PM; L2 Baseline = A @ 6/26/17 4:49 PM; Ar40 = P @ 6/26/17 4:49 PM; Ar39 = P @ 6/26/17 4:49 PM; Ar38 = L @ 6/26/17 4:49 PM; Ar37 = L @ 6/26/17 4:49 PM; Ar36 = P @ 6/26/17 4:49 PM; H2 Baseline = A @ 6/26/17 4:51 PM; H1 Baseline = A @ 6/26/17 4:51 PM; AX Baseline = …	J:29	LLLLLLAAAAAA	1	Pychron Script	1	Fusions CO2	4.5	0	0	0	0	30	30	17			0
	25	4.5	3.01999	0.0264087	0.0629	0.499544	19.3195	99.4555	15.3402	0.0816646	0.0031037								65697-25	RC15-HWW-107	37	2017-06-25	21.5833	3581271000	RCrow	Sanidine	29	IR962		129.138.12.160	7.875	H2 Baseline = A @ 6/26/17 4:49 PM; H1 Baseline = A @ 6/26/17 4:49 PM; AX Baseline = A @ 6/26/17 4:49 PM; L1 Baseline = A @ 6/26/17 4:49 PM; L2 Baseline = A @ 6/26/17 4:49 PM; Ar40 = P @ 6/26/17 4:49 PM; Ar39 = P @ 6/26/17 4:49 PM; Ar38 = L @ 6/26/17 4:49 PM; Ar37 = L @ 6/26/17 4:49 PM; Ar36 = P @ 6/26/17 4:49 PM; H2 Baseline = A @ 6/26/17 4:51 PM; H1 Baseline = A @ 6/26/17 4:51 PM; AX Baseline = …	J:29	LLLLLLAAAAAA	1	Pychron Script	1	Fusions CO2	4.5	0	0	0	0	30	30	32			0
	83	4.5	3.10959	0.0265792	0.3297	0.273173	19.1956	96.9313	15.3954	0.147605	0.0031037								65697-83	RC15-HWW-107	37	2017-06-26	7.13333	3581306000	RCrow	Sanidine	29	IR962		129.138.12.160	7.875	H2 Baseline = A @ 6/26/17 4:52 PM; H1 Baseline = A @ 6/26/17 4:52 PM; AX Baseline = A @ 6/26/17 4:52 PM; L1 Baseline = A @ 6/26/17 4:52 PM; L2 Baseline = A @ 6/26/17 4:52 PM; Ar40 = L @ 6/26/17 4:52 PM; Ar39 = L @ 6/26/17 4:52 PM; Ar38 = L @ 6/26/17 4:52 PM; Ar37 = L @ 6/26/17 4:52 PM; Ar36 = L @ 6/26/17 4:52 PM; Ar41 bk val,er = @ 6/26/17 5:01 PM; Average background @ 6/26/17 5:01 PM; Ar40 bk va…	J:29	LLLLLLAAAAAA	1	Pychron Script	1	Fusions CO2	4.5	0	0	0	0	30	30	91			0
	66	4.5	3.14777	0.0164138	0.4153	0.594392	31.0838	96.1335	15.4564	0.0715412	0.0031037								65697-66	RC15-HWW-107	37	2017-06-26	4.31667	3581296000	RCrow	Sanidine	29	IR962		129.138.12.160	7.875	H2 Baseline = A @ 6/26/17 4:50 PM; H1 Baseline = A @ 6/26/17 4:50 PM; AX Baseline = A @ 6/26/17 4:50 PM; L1 Baseline = A @ 6/26/17 4:50 PM; L2 Baseline = A @ 6/26/17 4:50 PM; Ar40 = L @ 6/26/17 4:50 PM; Ar39 = L @ 6/26/17 4:50 PM; Ar38 = L @ 6/26/17 4:50 PM; Ar37 = L @ 6/26/17 4:50 PM; Ar36 = L @ 6/26/17 4:50 PM; Ar41 bk val,er = @ 6/26/17 5:01 PM; Average background @ 6/26/17 5:01 PM; Ar40 bk va…		LLLLLLAAAAAA	1	Pychron Script	1	Fusions CO2	4.5	0	0	0	0	30	30	73			0
	58	4.5	3.08794	0.0253559	0.164	0.478827	20.1217	98.4938	15.5338	0.0775071	0.0031037								65697-58	RC15-HWW-107	37	2017-06-26	2.73333	3581290000	RCrow	Sanidine	29	IR962		129.138.12.160	7.875	H2 Baseline = A @ 6/26/17 4:50 PM; H1 Baseline = A @ 6/26/17 4:50 PM; AX Baseline = A @ 6/26/17 4:50 PM; L1 Baseline = A @ 6/26/17 4:50 PM; L2 Baseline = A @ 6/26/17 4:50 PM; Ar40 = L @ 6/26/17 4:50 PM; Ar39 = L @ 6/26/17 4:50 PM; Ar38 = L @ 6/26/17 4:50 PM; Ar37 = L @ 6/26/17 4:50 PM; Ar36 = L @ 6/26/17 4:50 PM; Ar41 bk val,er = @ 6/26/17 5:01 PM; Average background @ 6/26/17 5:01 PM; Ar40 bk va…		LLLLLLAAAAAA	1	Pychron Script	1	Fusions CO2	4.5	0	0	0	0	30	30	65			0
	49	4.5	3.0742	0.0088466	0.0924	1.2406	57.6723	99.1331	15.5645	0.0327122	0.0031037								65697-49	RC15-HWW-107	37	2017-06-26	1.48333	3581285000	RCrow	Sanidine	29	IR962		129.138.12.160	7.875	H2 Baseline = A @ 6/26/17 4:50 PM; H1 Baseline = A @ 6/26/17 4:50 PM; AX Baseline = A @ 6/26/17 4:50 PM; L1 Baseline = A @ 6/26/17 4:50 PM; L2 Baseline = A @ 6/26/17 4:50 PM; Ar40 = L @ 6/26/17 4:50 PM; Ar39 = L @ 6/26/17 4:50 PM; Ar38 = L @ 6/26/17 4:50 PM; Ar37 = L @ 6/26/17 4:50 PM; Ar36 = L @ 6/26/17 4:50 PM; Ar41 bk val,er = @ 6/26/17 5:01 PM; Average background @ 6/26/17 5:01 PM; Ar40 bk va…		LLLLLLAAAAAA	1	Pychron Script	1	Fusions CO2	4.5	0	0	0	0	30	30	56			0
	90	4.5	3.09737	0.03579	0.1511	0.426648	14.2555	98.6498	15.6059	0.102856	0.0031037								65697-90	RC15-HWW-107	37	2017-06-26	8.21667	3581310000	RCrow	Sanidine	29	IR962		129.138.12.160	7.875	H2 Baseline = A @ 6/26/17 4:52 PM; H1 Baseline = A @ 6/26/17 4:52 PM; AX Baseline = A @ 6/26/17 4:52 PM; L1 Baseline = A @ 6/26/17 4:52 PM; L2 Baseline = A @ 6/26/17 4:52 PM; Ar40 = L @ 6/26/17 4:52 PM; Ar39 = L @ 6/26/17 4:52 PM; Ar38 = L @ 6/26/17 4:52 PM; Ar37 = L @ 6/26/17 4:52 PM; Ar36 = L @ 6/26/17 4:52 PM; Ar41 bk val,er = @ 6/26/17 5:01 PM; Average background @ 6/26/17 5:01 PM; Ar40 bk va…	J:29	LLLLLLAAAAAA	1	Pychron Script	1	Fusions CO2	4.5	0	0	0	0	30	30	99			0
	04	4.5	3.19396	0.0057799	0.4425	0.424395	88.2721	95.9101	15.6464	0.0345855	0.0031037								65697-04	RC15-HWW-107	37	2017-06-25	17.35	3581256000	RCrow	Sanidine	29	IR962		129.138.12.160	7.875	H2 Baseline = A @ 6/26/17 4:49 PM; H1 Baseline = A @ 6/26/17 4:49 PM; AX Baseline = A @ 6/26/17 4:49 PM; L1 Baseline = A @ 6/26/17 4:49 PM; L2 Baseline = A @ 6/26/17 4:49 PM; Ar40 = P @ 6/26/17 4:49 PM; Ar39 = P @ 6/26/17 4:49 PM; Ar38 = L @ 6/26/17 4:49 PM; Ar37 = L @ 6/26/17 4:49 PM; Ar36 = P @ 6/26/17 4:49 PM; H2 Baseline = A @ 6/26/17 4:51 PM; H1 Baseline = A @ 6/26/17 4:51 PM; AX Baseline = …	J:29	LLLLLLAAAAAA	1	Pychron Script	1	Fusions CO2	4.5	0	0	0	0	30	30	11			0
	08	4.5	3.12063	0.0108882	0.1712	1.38633	46.8584	98.4024	15.6833	0.0116262	0.0031037								65697-08	RC15-HWW-107	37	2017-06-25	18.2	3581259000	RCrow	Sanidine	29	IR962		129.138.12.160	7.875	H2 Baseline = A @ 6/26/17 4:49 PM; H1 Baseline = A @ 6/26/17 4:49 PM; AX Baseline = A @ 6/26/17 4:49 PM; L1 Baseline = A @ 6/26/17 4:49 PM; L2 Baseline = A @ 6/26/17 4:49 PM; Ar40 = P @ 6/26/17 4:49 PM; Ar39 = P @ 6/26/17 4:49 PM; Ar38 = L @ 6/26/17 4:49 PM; Ar37 = L @ 6/26/17 4:49 PM; Ar36 = P @ 6/26/17 4:49 PM; H2 Baseline = A @ 6/26/17 4:51 PM; H1 Baseline = A @ 6/26/17 4:51 PM; AX Baseline = …	J:29	LLLLLLAAAAAA	1	Pychron Script	1	Fusions CO2	4.5	0	0	0	0	30	30	15			0
	46	4.5	3.12161	0.0255843	0.1088	1.33774	19.9421	99.0341	15.7887	0.0333751	0.0031037								65697-46	RC15-HWW-107	37	2017-06-26	1.21667	3581284000	RCrow	Sanidine	29	IR962		129.138.12.160	7.875	H2 Baseline = A @ 6/26/17 4:50 PM; H1 Baseline = A @ 6/26/17 4:50 PM; AX Baseline = A @ 6/26/17 4:50 PM; L1 Baseline = A @ 6/26/17 4:50 PM; L2 Baseline = A @ 6/26/17 4:50 PM; Ar40 = L @ 6/26/17 4:50 PM; Ar39 = L @ 6/26/17 4:50 PM; Ar38 = L @ 6/26/17 4:50 PM; Ar37 = L @ 6/26/17 4:50 PM; Ar36 = L @ 6/26/17 4:50 PM; Ar41 bk val,er = @ 6/26/17 5:01 PM; Average background @ 6/26/17 5:01 PM; Ar40 bk va…		LLLLLLAAAAAA	1	Pychron Script	1	Fusions CO2	4.5	0	0	0	0	30	30	53			0
	43	4.5	3.27647	0.0050234	0.6075	0.632588	101.565	94.5191	15.8182	0.079352	0.0031037								65697-43	RC15-HWW-107	37	2017-06-26	0.733333	3581283000	RCrow	Sanidine	29	IR962		129.138.12.160	7.875	H2 Baseline = A @ 6/26/17 4:50 PM; H1 Baseline = A @ 6/26/17 4:50 PM; AX Baseline = A @ 6/26/17 4:50 PM; L1 Baseline = A @ 6/26/17 4:50 PM; L2 Baseline = A @ 6/26/17 4:50 PM; Ar40 = L @ 6/26/17 4:50 PM; Ar39 = L @ 6/26/17 4:50 PM; Ar38 = L @ 6/26/17 4:50 PM; Ar37 = L @ 6/26/17 4:50 PM; Ar36 = L @ 6/26/17 4:50 PM; Ar41 bk val,er = @ 6/26/17 5:01 PM; Average background @ 6/26/17 5:01 PM; Ar40 bk va…		LLLLLLAAAAAA	1	Pychron Script	1	Fusions CO2	4.5	0	0	0	0	30	30	50			0
	69	4.5	3.19453	0.0096506	0.2875	0.746584	52.8676	97.3576	15.8844	0.0607188	0.0031037								65697-69	RC15-HWW-107	37	2017-06-26	4.58333	3581297000	RCrow	Sanidine	29	IR962		129.138.12.160	7.875	H2 Baseline = A @ 6/26/17 4:50 PM; H1 Baseline = A @ 6/26/17 4:50 PM; AX Baseline = A @ 6/26/17 4:50 PM; L1 Baseline = A @ 6/26/17 4:50 PM; L2 Baseline = A @ 6/26/17 4:50 PM; Ar40 = L @ 6/26/17 4:50 PM; Ar39 = L @ 6/26/17 4:50 PM; Ar38 = L @ 6/26/17 4:50 PM; Ar37 = L @ 6/26/17 4:50 PM; Ar36 = L @ 6/26/17 4:50 PM; Ar41 bk val,er = @ 6/26/17 5:01 PM; Average background @ 6/26/17 5:01 PM; Ar40 bk va…		LLLLLLAAAAAA	1	Pychron Script	1	Fusions CO2	4.5	0	0	0	0	30	30	76			0
	21	4.5	3.14233	0.0132129	0.0965	0.475667	38.6141	99.1262	15.9079	0.074547	0.0031037								65697-21	RC15-HWW-107	37	2017-06-25	21.2333	3581270000	RCrow	Sanidine	29	IR962		129.138.12.160	7.875	H2 Baseline = A @ 6/26/17 4:49 PM; H1 Baseline = A @ 6/26/17 4:49 PM; AX Baseline = A @ 6/26/17 4:49 PM; L1 Baseline = A @ 6/26/17 4:49 PM; L2 Baseline = A @ 6/26/17 4:49 PM; Ar40 = P @ 6/26/17 4:49 PM; Ar39 = P @ 6/26/17 4:49 PM; Ar38 = L @ 6/26/17 4:49 PM; Ar37 = L @ 6/26/17 4:49 PM; Ar36 = P @ 6/26/17 4:49 PM; H2 Baseline = A @ 6/26/17 4:51 PM; H1 Baseline = A @ 6/26/17 4:51 PM; AX Baseline = …	J:29	LLLLLLAAAAAA	1	Pychron Script	1	Fusions CO2	4.5	0	0	0	0	30	30	28			0
	40	4.5	3.15213	0.0169492	0.1227	0.495834	30.102	98.891	15.9198	0.0748084	0.0031037								65697-40	RC15-HWW-107	37	2017-06-25	23.6	3581279000	RCrow	Sanidine	29	IR962		129.138.12.160	7.875	H2 Baseline = A @ 6/26/17 4:49 PM; H1 Baseline = A @ 6/26/17 4:49 PM; AX Baseline = A @ 6/26/17 4:49 PM; L1 Baseline = A @ 6/26/17 4:49 PM; L2 Baseline = A @ 6/26/17 4:49 PM; Ar40 = P @ 6/26/17 4:49 PM; Ar39 = P @ 6/26/17 4:49 PM; Ar38 = L @ 6/26/17 4:49 PM; Ar37 = L @ 6/26/17 4:49 PM; Ar36 = P @ 6/26/17 4:49 PM; H2 Baseline = A @ 6/26/17 4:51 PM; H1 Baseline = A @ 6/26/17 4:51 PM; AX Baseline = …	J:29	LLLLLLAAAAAA	1	Pychron Script	1	Fusions CO2	4.5	0	0	0	0	30	30	47			0
	34	4.5	3.52631	0.0033416	1.3711	0.442901	152.683	88.4902	15.941	0.119043	0.0031037								65697-34	RC15-HWW-107	37	2017-06-25	22.9333	3581276000	RCrow	Sanidine	29	IR962		129.138.12.160	7.875	H2 Baseline = A @ 6/26/17 4:49 PM; H1 Baseline = A @ 6/26/17 4:49 PM; AX Baseline = A @ 6/26/17 4:49 PM; L1 Baseline = A @ 6/26/17 4:49 PM; L2 Baseline = A @ 6/26/17 4:49 PM; Ar40 = P @ 6/26/17 4:49 PM; Ar39 = P @ 6/26/17 4:49 PM; Ar38 = L @ 6/26/17 4:49 PM; Ar37 = L @ 6/26/17 4:49 PM; Ar36 = P @ 6/26/17 4:49 PM; H2 Baseline = A @ 6/26/17 4:51 PM; H1 Baseline = A @ 6/26/17 4:51 PM; AX Baseline = …	J:29	LLLLLLAAAAAA	1	Pychron Script	1	Fusions CO2	4.5	0	0	0	0	30	30	41			0
	56	4.5	3.51264	0.0049466	1.27	0.673342	103.142	89.3009	16.0241	0.086773	0.0031037								65697-56	RC15-HWW-107	37	2017-06-26	2.43333	3581289000	RCrow	Sanidine	29	IR962		129.138.12.160	7.875	H2 Baseline = A @ 6/26/17 4:50 PM; H1 Baseline = A @ 6/26/17 4:50 PM; AX Baseline = A @ 6/26/17 4:50 PM; L1 Baseline = A @ 6/26/17 4:50 PM; L2 Baseline = A @ 6/26/17 4:50 PM; Ar40 = L @ 6/26/17 4:50 PM; Ar39 = L @ 6/26/17 4:50 PM; Ar38 = L @ 6/26/17 4:50 PM; Ar37 = L @ 6/26/17 4:50 PM; Ar36 = L @ 6/26/17 4:50 PM; Ar41 bk val,er = @ 6/26/17 5:01 PM; Average background @ 6/26/17 5:01 PM; Ar40 bk va…		LLLLLLAAAAAA	1	Pychron Script	1	Fusions CO2	4.5	0	0	0	0	30	30	63			0
	26	4.5	3.24623	0.0038209	0.3495	0.359509	133.53	96.8256	16.0532	0.1144	0.0031037								65697-26	RC15-HWW-107	37	2017-06-25	21.6667	3581272000	RCrow	Sanidine	29	IR962		129.138.12.160	7.875	H2 Baseline = A @ 6/26/17 4:49 PM; H1 Baseline = A @ 6/26/17 4:49 PM; AX Baseline = A @ 6/26/17 4:49 PM; L1 Baseline = A @ 6/26/17 4:49 PM; L2 Baseline = A @ 6/26/17 4:49 PM; Ar40 = P @ 6/26/17 4:49 PM; Ar39 = P @ 6/26/17 4:49 PM; Ar38 = L @ 6/26/17 4:49 PM; Ar37 = L @ 6/26/17 4:49 PM; Ar36 = P @ 6/26/17 4:49 PM; H2 Baseline = A @ 6/26/17 4:51 PM; H1 Baseline = A @ 6/26/17 4:51 PM; AX Baseline = …	J:29	LLLLLLAAAAAA	1	Pychron Script	1	Fusions CO2	4.5	0	0	0	0	30	30	33			0
	65	4.5	3.17337	0.0065661	0.0887	0.545431	77.7027	99.1893	16.0749	0.0784747	0.0031037								65697-65	RC15-HWW-107	37	2017-06-26	4.21667	3581295000	RCrow	Sanidine	29	IR962		129.138.12.160	7.875	H2 Baseline = A @ 6/26/17 4:50 PM; H1 Baseline = A @ 6/26/17 4:50 PM; AX Baseline = A @ 6/26/17 4:50 PM; L1 Baseline = A @ 6/26/17 4:50 PM; L2 Baseline = A @ 6/26/17 4:50 PM; Ar40 = L @ 6/26/17 4:50 PM; Ar39 = L @ 6/26/17 4:50 PM; Ar38 = L @ 6/26/17 4:50 PM; Ar37 = L @ 6/26/17 4:50 PM; Ar36 = L @ 6/26/17 4:50 PM; Ar41 bk val,er = @ 6/26/17 5:01 PM; Average background @ 6/26/17 5:01 PM; Ar40 bk va…		LLLLLLAAAAAA	1	Pychron Script	1	Fusions CO2	4.5	0	0	0	0	30	30	72			0
	18	4.5	3.29845	0.007153	0.5023	0.57044	71.3273	95.5074	16.0899	0.0726385	0.0031037								65697-18	RC15-HWW-107	37	2017-06-25	20.2333	3581266000	RCrow	Sanidine	29	IR962		129.138.12.160	7.875	H2 Baseline = A @ 6/26/17 4:49 PM; H1 Baseline = A @ 6/26/17 4:49 PM; AX Baseline = A @ 6/26/17 4:49 PM; L1 Baseline = A @ 6/26/17 4:49 PM; L2 Baseline = A @ 6/26/17 4:49 PM; Ar40 = P @ 6/26/17 4:49 PM; Ar39 = P @ 6/26/17 4:49 PM; Ar38 = L @ 6/26/17 4:49 PM; Ar37 = L @ 6/26/17 4:49 PM; Ar36 = P @ 6/26/17 4:49 PM; H2 Baseline = A @ 6/26/17 4:51 PM; H1 Baseline = A @ 6/26/17 4:51 PM; AX Baseline = …	J:29	LLLLLLAAAAAA	1	Pychron Script	1	Fusions CO2	4.5	0	0	0	0	30	30	25			0
	42	4.5	3.84859	0.0018094	2.3621	0.173066	281.974	81.8296	16.091	0.285326	0.0031037								65697-42	RC15-HWW-107	37	2017-06-26	0.65	3581282000	RCrow	Sanidine	29	IR962		129.138.12.160	7.875	H2 Baseline = A @ 6/26/17 4:50 PM; H1 Baseline = A @ 6/26/17 4:50 PM; AX Baseline = A @ 6/26/17 4:50 PM; L1 Baseline = A @ 6/26/17 4:50 PM; L2 Baseline = A @ 6/26/17 4:50 PM; Ar40 = L @ 6/26/17 4:50 PM; Ar39 = L @ 6/26/17 4:50 PM; Ar38 = L @ 6/26/17 4:50 PM; Ar37 = L @ 6/26/17 4:50 PM; Ar36 = L @ 6/26/17 4:50 PM; Ar41 bk val,er = @ 6/26/17 5:01 PM; Average background @ 6/26/17 5:01 PM; Ar40 bk va…		LLLLLLAAAAAA	1	Pychron Script	1	Fusions CO2	4.5	0	0	0	0	30	30	49			0
	59	4.5	3.43121	0.0192492	0.9288	0.475096	26.5052	92.0276	16.1293	0.105893	0.0031037								65697-59	RC15-HWW-107	37	2017-06-26	2.83333	3581290000	RCrow	Sanidine	29	IR962		129.138.12.160	7.875	H2 Baseline = A @ 6/26/17 4:50 PM; H1 Baseline = A @ 6/26/17 4:50 PM; AX Baseline = A @ 6/26/17 4:50 PM; L1 Baseline = A @ 6/26/17 4:50 PM; L2 Baseline = A @ 6/26/17 4:50 PM; Ar40 = L @ 6/26/17 4:50 PM; Ar39 = L @ 6/26/17 4:50 PM; Ar38 = L @ 6/26/17 4:50 PM; Ar37 = L @ 6/26/17 4:50 PM; Ar36 = L @ 6/26/17 4:50 PM; Ar41 bk val,er = @ 6/26/17 5:01 PM; Average background @ 6/26/17 5:01 PM; Ar40 bk va…		LLLLLLAAAAAA	1	Pychron Script	1	Fusions CO2	4.5	0	0	0	0	30	30	66			0
	30	4.5	3.17587	0.0093048	0.0417	1.52465	54.8323	99.6352	16.1596	0.027916	0.0031037								65697-30	RC15-HWW-107	37	2017-06-25	22.1667	3581273000	RCrow	Sanidine	29	IR962		129.138.12.160	7.875	H2 Baseline = A @ 6/26/17 4:49 PM; H1 Baseline = A @ 6/26/17 4:49 PM; AX Baseline = A @ 6/26/17 4:49 PM; L1 Baseline = A @ 6/26/17 4:49 PM; L2 Baseline = A @ 6/26/17 4:49 PM; Ar40 = P @ 6/26/17 4:49 PM; Ar39 = P @ 6/26/17 4:49 PM; Ar38 = L @ 6/26/17 4:49 PM; Ar37 = L @ 6/26/17 4:49 PM; Ar36 = P @ 6/26/17 4:49 PM; H2 Baseline = A @ 6/26/17 4:51 PM; H1 Baseline = A @ 6/26/17 4:51 PM; AX Baseline = …	J:29	LLLLLLAAAAAA	1	Pychron Script	1	Fusions CO2	4.5	0	0	0	0	30	30	37			0
	76	4.5	4.01117	0.0233463	2.8689	0.0462585	21.8537	78.8841	16.1685	0.576115	0.0031037								65697-76	RC15-HWW-107	37	2017-06-26	6.06667	3581302000	RCrow	Sanidine	29	IR962		129.138.12.160	7.875	H2 Baseline = A @ 6/26/17 4:50 PM; H1 Baseline = A @ 6/26/17 4:50 PM; AX Baseline = A @ 6/26/17 4:50 PM; L1 Baseline = A @ 6/26/17 4:50 PM; L2 Baseline = A @ 6/26/17 4:50 PM; Ar40 = L @ 6/26/17 4:50 PM; Ar39 = L @ 6/26/17 4:50 PM; Ar38 = L @ 6/26/17 4:50 PM; Ar37 = L @ 6/26/17 4:50 PM; Ar36 = L @ 6/26/17 4:50 PM; Ar41 bk val,er = @ 6/26/17 5:01 PM; Average background @ 6/26/17 5:01 PM; Ar40 bk va…		LLLLLLAAAAAA	1	Pychron Script	1	Fusions CO2	4.5	0	0	0	0	30	30	83			0
	93	4.5	3.23528	0.030127	0.2354	0.465257	16.9351	97.922	16.1798	0.105164	0.0031037								65697-93	RC15-HWW-107	37	2017-06-26	8.48333	3581311000	RCrow	Sanidine	29	IR962		129.138.12.160	7.875	H2 Baseline = A @ 6/26/17 4:52 PM; H1 Baseline = A @ 6/26/17 4:52 PM; AX Baseline = A @ 6/26/17 4:52 PM; L1 Baseline = A @ 6/26/17 4:52 PM; L2 Baseline = A @ 6/26/17 4:52 PM; Ar40 = L @ 6/26/17 4:52 PM; Ar39 = L @ 6/26/17 4:52 PM; Ar38 = L @ 6/26/17 4:52 PM; Ar37 = L @ 6/26/17 4:52 PM; Ar36 = L @ 6/26/17 4:52 PM; Ar41 bk val,er = @ 6/26/17 5:01 PM; Average background @ 6/26/17 5:01 PM; Ar40 bk va…	J:29	LLLLLLAAAAAA	1	Pychron Script	1	Fusions CO2	4.5	0	0	0	0	30	30	102			0
	36	4.5	3.21375	0.0106839	0.1448	0.608117	47.7545	98.6937	16.1982	0.064744	0.0031037								65697-36	RC15-HWW-107	37	2017-06-25	23.1167	3581277000	RCrow	Sanidine	29	IR962		129.138.12.160	7.875	H2 Baseline = A @ 6/26/17 4:49 PM; H1 Baseline = A @ 6/26/17 4:49 PM; AX Baseline = A @ 6/26/17 4:49 PM; L1 Baseline = A @ 6/26/17 4:49 PM; L2 Baseline = A @ 6/26/17 4:49 PM; Ar40 = P @ 6/26/17 4:49 PM; Ar39 = P @ 6/26/17 4:49 PM; Ar38 = L @ 6/26/17 4:49 PM; Ar37 = L @ 6/26/17 4:49 PM; Ar36 = P @ 6/26/17 4:49 PM; H2 Baseline = A @ 6/26/17 4:51 PM; H1 Baseline = A @ 6/26/17 4:51 PM; AX Baseline = …	J:29	LLLLLLAAAAAA	1	Pychron Script	1	Fusions CO2	4.5	0	0	0	0	30	30	43			0
	78	4.5	3.25809	0.0460668	0.2944	0.234888	11.0753	97.4399	16.214	0.16534	0.0031037								65697-78	RC15-HWW-107	37	2017-06-26	6.25	3581303000	RCrow	Sanidine	29	IR962		129.138.12.160	7.875	H2 Baseline = A @ 6/26/17 4:50 PM; H1 Baseline = A @ 6/26/17 4:50 PM; AX Baseline = A @ 6/26/17 4:50 PM; L1 Baseline = A @ 6/26/17 4:50 PM; L2 Baseline = A @ 6/26/17 4:50 PM; Ar40 = L @ 6/26/17 4:50 PM; Ar39 = L @ 6/26/17 4:50 PM; Ar38 = L @ 6/26/17 4:50 PM; Ar37 = L @ 6/26/17 4:50 PM; Ar36 = L @ 6/26/17 4:50 PM; Ar41 bk val,er = @ 6/26/17 5:01 PM; Average background @ 6/26/17 5:01 PM; Ar40 bk va…		LLLLLLAAAAAA	1	Pychron Script	1	Fusions CO2	4.5	0	0	0	0	30	30	86			0
	47	4.5	3.20612	0.0007606	0.1026	0.494814	670.791	99.0552	16.2186	0.0780686	0.0031037								65697-47	RC15-HWW-107	37	2017-06-26	1.3	3581285000	RCrow	Sanidine	29	IR962		129.138.12.160	7.875	H2 Baseline = A @ 6/26/17 4:50 PM; H1 Baseline = A @ 6/26/17 4:50 PM; AX Baseline = A @ 6/26/17 4:50 PM; L1 Baseline = A @ 6/26/17 4:50 PM; L2 Baseline = A @ 6/26/17 4:50 PM; Ar40 = L @ 6/26/17 4:50 PM; Ar39 = L @ 6/26/17 4:50 PM; Ar38 = L @ 6/26/17 4:50 PM; Ar37 = L @ 6/26/17 4:50 PM; Ar36 = L @ 6/26/17 4:50 PM; Ar41 bk val,er = @ 6/26/17 5:01 PM; Average background @ 6/26/17 5:01 PM; Ar40 bk va…		LLLLLLAAAAAA	1	Pychron Script	1	Fusions CO2	4.5	0	0	0	0	30	30	54			0
	72	4.5	3.20976	0.0244755	0.0848	0.337628	20.8455	99.2827	16.2744	0.101794	0.0031037								65697-72	RC15-HWW-107	37	2017-06-26	5.25	3581299000	RCrow	Sanidine	29	IR962		129.138.12.160	7.875	H2 Baseline = A @ 6/26/17 4:50 PM; H1 Baseline = A @ 6/26/17 4:50 PM; AX Baseline = A @ 6/26/17 4:50 PM; L1 Baseline = A @ 6/26/17 4:50 PM; L2 Baseline = A @ 6/26/17 4:50 PM; Ar40 = L @ 6/26/17 4:50 PM; Ar39 = L @ 6/26/17 4:50 PM; Ar38 = L @ 6/26/17 4:50 PM; Ar37 = L @ 6/26/17 4:50 PM; Ar36 = L @ 6/26/17 4:50 PM; Ar41 bk val,er = @ 6/26/17 5:01 PM; Average background @ 6/26/17 5:01 PM; Ar40 bk va…		LLLLLLAAAAAA	1	Pychron Script	1	Fusions CO2	4.5	0	0	0	0	30	30	79			0
	23	4.5	3.22324	0.00542	0.086	1.43157	94.1336	99.2243	16.3328	0.0306643	0.0031037								65697-23	RC15-HWW-107	37	2017-06-25	21.4	3581271000	RCrow	Sanidine	29	IR962		129.138.12.160	7.875	H2 Baseline = A @ 6/26/17 4:49 PM; H1 Baseline = A @ 6/26/17 4:49 PM; AX Baseline = A @ 6/26/17 4:49 PM; L1 Baseline = A @ 6/26/17 4:49 PM; L2 Baseline = A @ 6/26/17 4:49 PM; Ar40 = P @ 6/26/17 4:49 PM; Ar39 = P @ 6/26/17 4:49 PM; Ar38 = L @ 6/26/17 4:49 PM; Ar37 = L @ 6/26/17 4:49 PM; Ar36 = P @ 6/26/17 4:49 PM; H2 Baseline = A @ 6/26/17 4:51 PM; H1 Baseline = A @ 6/26/17 4:51 PM; AX Baseline = …	J:29	LLLLLLAAAAAA	1	Pychron Script	1	Fusions CO2	4.5	0	0	0	0	30	30	30			0
	19	4.5	3.34854	0.318279	0.5314	0.343726	1.60301	96.0672	16.4329	0.128976	0.0031037								65697-19	RC15-HWW-107	37	2017-06-25	20.3333	3581267000	RCrow	Sanidine	29	IR962		129.138.12.160	7.875	H2 Baseline = A @ 6/26/17 4:49 PM; H1 Baseline = A @ 6/26/17 4:49 PM; AX Baseline = A @ 6/26/17 4:49 PM; L1 Baseline = A @ 6/26/17 4:49 PM; L2 Baseline = A @ 6/26/17 4:49 PM; Ar40 = P @ 6/26/17 4:49 PM; Ar39 = P @ 6/26/17 4:49 PM; Ar38 = L @ 6/26/17 4:49 PM; Ar37 = L @ 6/26/17 4:49 PM; Ar36 = P @ 6/26/17 4:49 PM; H2 Baseline = A @ 6/26/17 4:51 PM; H1 Baseline = A @ 6/26/17 4:51 PM; AX Baseline = …	J:29	LLLLLLAAAAAA	1	Pychron Script	1	Fusions CO2	4.5	0	0	0	0	30	30	26			0
	45	4.5	3.28911	0.0310738	0.1224	0.946883	16.4191	98.973	16.6243	0.0449083	0.0031037								65697-45	RC15-HWW-107	37	2017-06-26	0.916667	3581283000	RCrow	Sanidine	29	IR962		129.138.12.160	7.875	H2 Baseline = A @ 6/26/17 4:50 PM; H1 Baseline = A @ 6/26/17 4:50 PM; AX Baseline = A @ 6/26/17 4:50 PM; L1 Baseline = A @ 6/26/17 4:50 PM; L2 Baseline = A @ 6/26/17 4:50 PM; Ar40 = L @ 6/26/17 4:50 PM; Ar39 = L @ 6/26/17 4:50 PM; Ar38 = L @ 6/26/17 4:50 PM; Ar37 = L @ 6/26/17 4:50 PM; Ar36 = L @ 6/26/17 4:50 PM; Ar41 bk val,er = @ 6/26/17 5:01 PM; Average background @ 6/26/17 5:01 PM; Ar40 bk va…		LLLLLLAAAAAA	1	Pychron Script	1	Fusions CO2	4.5	0	0	0	0	30	30	52			0
	27	4.5	3.63495	0.0056807	1.2218	0.0363518	89.8136	90.0601	16.7213	0.693422	0.0031037								65697-27	RC15-HWW-107	37	2017-06-25	21.7667	3581272000	RCrow	Sanidine	29	IR962		129.138.12.160	7.875	H2 Baseline = A @ 6/26/17 4:49 PM; H1 Baseline = A @ 6/26/17 4:49 PM; AX Baseline = A @ 6/26/17 4:49 PM; L1 Baseline = A @ 6/26/17 4:49 PM; L2 Baseline = A @ 6/26/17 4:49 PM; Ar40 = P @ 6/26/17 4:49 PM; Ar39 = P @ 6/26/17 4:49 PM; Ar38 = L @ 6/26/17 4:49 PM; Ar37 = L @ 6/26/17 4:49 PM; Ar36 = P @ 6/26/17 4:49 PM; H2 Baseline = A @ 6/26/17 4:51 PM; H1 Baseline = A @ 6/26/17 4:51 PM; AX Baseline = …	J:29	LLLLLLAAAAAA	1	Pychron Script	1	Fusions CO2	4.5	0	0	0	0	30	30	34			0
	02	4.5	3.30545	0.0057625	0.0789	1.17519	88.5387	99.3064	16.7624	0.0127219	0.0031037								65697-02	RC15-HWW-107	37	2017-06-25	17.05	3581255000	RCrow	Sanidine	29	IR962		129.138.12.160	7.875	H2 Baseline = A @ 6/26/17 4:49 PM; H1 Baseline = A @ 6/26/17 4:49 PM; AX Baseline = A @ 6/26/17 4:49 PM; L1 Baseline = A @ 6/26/17 4:49 PM; L2 Baseline = A @ 6/26/17 4:49 PM; Ar40 = P @ 6/26/17 4:49 PM; Ar39 = P @ 6/26/17 4:49 PM; Ar38 = L @ 6/26/17 4:49 PM; Ar37 = L @ 6/26/17 4:49 PM; Ar36 = P @ 6/26/17 4:49 PM; H2 Baseline = A @ 6/26/17 4:50 PM; H1 Baseline = A @ 6/26/17 4:50 PM; AX Baseline = …	J:29	LLLLLLAAAAAA	1	Pychron Script	1	Fusions CO2	4.5	0	0	0	0	30	30	9			0
	86	4.5	3.92378	0.0390597	2.0963	0.120809	13.0622	84.262	16.8905	0.381812	0.0031037								65697-86	RC15-HWW-107	37	2017-06-26	7.4	3581307000	RCrow	Sanidine	29	IR962		129.138.12.160	7.875	H2 Baseline = A @ 6/26/17 4:52 PM; H1 Baseline = A @ 6/26/17 4:52 PM; AX Baseline = A @ 6/26/17 4:52 PM; L1 Baseline = A @ 6/26/17 4:52 PM; L2 Baseline = A @ 6/26/17 4:52 PM; Ar40 = L @ 6/26/17 4:52 PM; Ar39 = L @ 6/26/17 4:52 PM; Ar38 = L @ 6/26/17 4:52 PM; Ar37 = L @ 6/26/17 4:52 PM; Ar36 = L @ 6/26/17 4:52 PM; Ar41 bk val,er = @ 6/26/17 5:01 PM; Average background @ 6/26/17 5:01 PM; Ar40 bk va…	J:29	LLLLLLAAAAAA	1	Pychron Script	1	Fusions CO2	4.5	0	0	0	0	30	30	95			0
	85	4.5	3.42415	0.0226394	0.3874	0.441849	22.5361	96.7034	16.9103	0.0955486	0.0031037								65697-85	RC15-HWW-107	37	2017-06-26	7.3	3581306000	RCrow	Sanidine	29	IR962		129.138.12.160	7.875	H2 Baseline = A @ 6/26/17 4:52 PM; H1 Baseline = A @ 6/26/17 4:52 PM; AX Baseline = A @ 6/26/17 4:52 PM; L1 Baseline = A @ 6/26/17 4:52 PM; L2 Baseline = A @ 6/26/17 4:52 PM; Ar40 = L @ 6/26/17 4:52 PM; Ar39 = L @ 6/26/17 4:52 PM; Ar38 = L @ 6/26/17 4:52 PM; Ar37 = L @ 6/26/17 4:52 PM; Ar36 = L @ 6/26/17 4:52 PM; Ar41 bk val,er = @ 6/26/17 5:01 PM; Average background @ 6/26/17 5:01 PM; Ar40 bk va…	J:29	LLLLLLAAAAAA	1	Pychron Script	1	Fusions CO2	4.5	0	0	0	0	30	30	94			0
	101	4.5	3.71019	0.0640261	1.2517	0.113435	7.96869	90.1482	17.084	0.331033	0.0031037								65697-101	RC15-HWW-107	37	2017-06-26	9.43333	3581314000	RCrow	Sanidine	29	IR962		129.138.12.160	7.875	H2 Baseline = A @ 6/26/17 4:52 PM; H1 Baseline = A @ 6/26/17 4:52 PM; AX Baseline = A @ 6/26/17 4:52 PM; L1 Baseline = A @ 6/26/17 4:52 PM; L2 Baseline = A @ 6/26/17 4:52 PM; Ar40 = L @ 6/26/17 4:52 PM; Ar39 = L @ 6/26/17 4:52 PM; Ar38 = L @ 6/26/17 4:52 PM; Ar37 = L @ 6/26/17 4:52 PM; Ar36 = L @ 6/26/17 4:52 PM; Ar41 bk val,er = @ 6/26/17 5:01 PM; Average background @ 6/26/17 5:01 PM; Ar40 bk va…	J:29	LLLLLLAAAAAA	1	Pychron Script	1	Fusions CO2	4.5	0	0	0	0	30	30	110			0
	61	4.5	3.49935	0.0263012	0.4977	0.529869	19.3985	95.8489	17.129	0.0755695	0.0031037								65697-61	RC15-HWW-107	37	2017-06-26	3.88333	3581294000	RCrow	Sanidine	29	IR962		129.138.12.160	7.875	H2 Baseline = A @ 6/26/17 4:50 PM; H1 Baseline = A @ 6/26/17 4:50 PM; AX Baseline = A @ 6/26/17 4:50 PM; L1 Baseline = A @ 6/26/17 4:50 PM; L2 Baseline = A @ 6/26/17 4:50 PM; Ar40 = L @ 6/26/17 4:50 PM; Ar39 = L @ 6/26/17 4:50 PM; Ar38 = L @ 6/26/17 4:50 PM; Ar37 = L @ 6/26/17 4:50 PM; Ar36 = L @ 6/26/17 4:50 PM; Ar41 bk val,er = @ 6/26/17 5:01 PM; Average background @ 6/26/17 5:01 PM; Ar40 bk va…		LLLLLLAAAAAA	1	Pychron Script	1	Fusions CO2	4.5	0	0	0	0	30	30	68			0
	62	4.5	3.84759	0.038679	1.6653	0.351481	13.1907	87.2622	17.1503	0.148674	0.0031037								65697-62	RC15-HWW-107	37	2017-06-26	3.96667	3581294000	RCrow	Sanidine	29	IR962		129.138.12.160	7.875	H2 Baseline = A @ 6/26/17 4:50 PM; H1 Baseline = A @ 6/26/17 4:50 PM; AX Baseline = A @ 6/26/17 4:50 PM; L1 Baseline = A @ 6/26/17 4:50 PM; L2 Baseline = A @ 6/26/17 4:50 PM; Ar40 = L @ 6/26/17 4:50 PM; Ar39 = L @ 6/26/17 4:50 PM; Ar38 = L @ 6/26/17 4:50 PM; Ar37 = L @ 6/26/17 4:50 PM; Ar36 = L @ 6/26/17 4:50 PM; Ar41 bk val,er = @ 6/26/17 5:01 PM; Average background @ 6/26/17 5:01 PM; Ar40 bk va…		LLLLLLAAAAAA	1	Pychron Script	1	Fusions CO2	4.5	0	0	0	0	30	30	69			0
	31	4.5	3.59502	0.021069	0.805	0.236643	24.2159	93.4172	17.1518	0.19647	0.0031037								65697-31	RC15-HWW-107	37	2017-06-25	22.6667	3581275000	RCrow	Sanidine	29	IR962		129.138.12.160	7.875	H2 Baseline = A @ 6/26/17 4:49 PM; H1 Baseline = A @ 6/26/17 4:49 PM; AX Baseline = A @ 6/26/17 4:49 PM; L1 Baseline = A @ 6/26/17 4:49 PM; L2 Baseline = A @ 6/26/17 4:49 PM; Ar40 = P @ 6/26/17 4:49 PM; Ar39 = P @ 6/26/17 4:49 PM; Ar38 = L @ 6/26/17 4:49 PM; Ar37 = L @ 6/26/17 4:49 PM; Ar36 = P @ 6/26/17 4:49 PM; H2 Baseline = A @ 6/26/17 4:51 PM; H1 Baseline = A @ 6/26/17 4:51 PM; AX Baseline = …	J:29	LLLLLLAAAAAA	1	Pychron Script	1	Fusions CO2	4.5	0	0	0	0	30	30	38			0
	91	4.5	3.85726	0.0199395	1.6609	0.262441	25.5876	87.2955	17.1996	0.210782	0.0031037								65697-91	RC15-HWW-107	37	2017-06-26	8.3	3581310000	RCrow	Sanidine	29	IR962		129.138.12.160	7.875	H2 Baseline = A @ 6/26/17 4:52 PM; H1 Baseline = A @ 6/26/17 4:52 PM; AX Baseline = A @ 6/26/17 4:52 PM; L1 Baseline = A @ 6/26/17 4:52 PM; L2 Baseline = A @ 6/26/17 4:52 PM; Ar40 = L @ 6/26/17 4:52 PM; Ar39 = L @ 6/26/17 4:52 PM; Ar38 = L @ 6/26/17 4:52 PM; Ar37 = L @ 6/26/17 4:52 PM; Ar36 = L @ 6/26/17 4:52 PM; Ar41 bk val,er = @ 6/26/17 5:01 PM; Average background @ 6/26/17 5:01 PM; Ar40 bk va…	J:29	LLLLLLAAAAAA	1	Pychron Script	1	Fusions CO2	4.5	0	0	0	0	30	30	100			0
	98	4.5	3.48209	0.0236048	0.389	0.122229	21.6144	96.7517	17.2044	0.31771	0.0031037								65697-98	RC15-HWW-107	37	2017-06-26	9.16667	3581313000	RCrow	Sanidine	29	IR962		129.138.12.160	7.875	H2 Baseline = A @ 6/26/17 4:52 PM; H1 Baseline = A @ 6/26/17 4:52 PM; AX Baseline = A @ 6/26/17 4:52 PM; L1 Baseline = A @ 6/26/17 4:52 PM; L2 Baseline = A @ 6/26/17 4:52 PM; Ar40 = L @ 6/26/17 4:52 PM; Ar39 = L @ 6/26/17 4:52 PM; Ar38 = L @ 6/26/17 4:52 PM; Ar37 = L @ 6/26/17 4:52 PM; Ar36 = L @ 6/26/17 4:52 PM; Ar41 bk val,er = @ 6/26/17 5:01 PM; Average background @ 6/26/17 5:01 PM; Ar40 bk va…	J:29	LLLLLLAAAAAA	1	Pychron Script	1	Fusions CO2	4.5	0	0	0	0	30	30	107			0
	33	4.5	4.67744	0.031205	4.4331	0.508822	16.3501	71.996	17.2084	0.141119	0.0031037								65697-33	RC15-HWW-107	37	2017-06-25	22.85	3581276000	RCrow	Sanidine	29	IR962		129.138.12.160	7.875	H2 Baseline = A @ 6/26/17 4:49 PM; H1 Baseline = A @ 6/26/17 4:49 PM; AX Baseline = A @ 6/26/17 4:49 PM; L1 Baseline = A @ 6/26/17 4:49 PM; L2 Baseline = A @ 6/26/17 4:49 PM; Ar40 = P @ 6/26/17 4:49 PM; Ar39 = P @ 6/26/17 4:49 PM; Ar38 = L @ 6/26/17 4:49 PM; Ar37 = L @ 6/26/17 4:49 PM; Ar36 = P @ 6/26/17 4:49 PM; H2 Baseline = A @ 6/26/17 4:51 PM; H1 Baseline = A @ 6/26/17 4:51 PM; AX Baseline = …	J:29	LLLLLLAAAAAA	1	Pychron Script	1	Fusions CO2	4.5	0	0	0	0	30	30	40			0
	48	4.5	3.43713	0.0234619	0.2137	0.443401	21.7461	98.2148	17.2384	0.0853246	0.0031037								65697-48	RC15-HWW-107	37	2017-06-26	1.4	3581285000	RCrow	Sanidine	29	IR962		129.138.12.160	7.875	H2 Baseline = A @ 6/26/17 4:50 PM; H1 Baseline = A @ 6/26/17 4:50 PM; AX Baseline = A @ 6/26/17 4:50 PM; L1 Baseline = A @ 6/26/17 4:50 PM; L2 Baseline = A @ 6/26/17 4:50 PM; Ar40 = L @ 6/26/17 4:50 PM; Ar39 = L @ 6/26/17 4:50 PM; Ar38 = L @ 6/26/17 4:50 PM; Ar37 = L @ 6/26/17 4:50 PM; Ar36 = L @ 6/26/17 4:50 PM; Ar41 bk val,er = @ 6/26/17 5:01 PM; Average background @ 6/26/17 5:01 PM; Ar40 bk va…		LLLLLLAAAAAA	1	Pychron Script	1	Fusions CO2	4.5	0	0	0	0	30	30	55			0
	104	4.5	3.5632	0.014174	0.6182	0.545387	35.9958	94.8931	17.2676	0.0802487	0.0031037								65697-104	RC15-HWW-107	37	2017-06-26	9.9	3581316000	RCrow	Sanidine	29	IR962		129.138.12.160	7.875	H2 Baseline = A @ 6/26/17 4:52 PM; H1 Baseline = A @ 6/26/17 4:52 PM; AX Baseline = A @ 6/26/17 4:52 PM; L1 Baseline = A @ 6/26/17 4:52 PM; L2 Baseline = A @ 6/26/17 4:52 PM; Ar40 = L @ 6/26/17 4:52 PM; Ar39 = L @ 6/26/17 4:52 PM; Ar38 = L @ 6/26/17 4:52 PM; Ar37 = L @ 6/26/17 4:52 PM; Ar36 = L @ 6/26/17 4:52 PM; Ar41 bk val,er = @ 6/26/17 5:01 PM; Average background @ 6/26/17 5:01 PM; Ar40 bk va…	J:29	LLLLLLAAAAAA	1	Pychron Script	1	Fusions CO2	4.5	0	0	0	0	30	30	113			0
	15	4.5	3.71087	0.0202201	1.098	0.174116	25.2325	91.2828	17.3006	0.294563	0.0031037								65697-15	RC15-HWW-107	37	2017-06-25	19.7667	3581265000	RCrow	Sanidine	29	IR962		129.138.12.160	7.875	H2 Baseline = A @ 6/26/17 4:49 PM; H1 Baseline = A @ 6/26/17 4:49 PM; AX Baseline = A @ 6/26/17 4:49 PM; L1 Baseline = A @ 6/26/17 4:49 PM; L2 Baseline = A @ 6/26/17 4:49 PM; Ar40 = P @ 6/26/17 4:49 PM; Ar39 = P @ 6/26/17 4:49 PM; Ar38 = L @ 6/26/17 4:49 PM; Ar37 = L @ 6/26/17 4:49 PM; Ar36 = P @ 6/26/17 4:49 PM; H2 Baseline = A @ 6/26/17 4:51 PM; H1 Baseline = A @ 6/26/17 4:51 PM; AX Baseline = …	J:29	LLLLLLAAAAAA	1	Pychron Script	1	Fusions CO2	4.5	0	0	0	0	30	30	22			0
	51	4.5	3.55786	0.049431	0.5661	0.718886	10.3215	95.4038	17.3345	0.0686168	0.0031037								65697-51	RC15-HWW-107	37	2017-06-26	2	3581287000	RCrow	Sanidine	29	IR962		129.138.12.160	7.875	H2 Baseline = A @ 6/26/17 4:50 PM; H1 Baseline = A @ 6/26/17 4:50 PM; AX Baseline = A @ 6/26/17 4:50 PM; L1 Baseline = A @ 6/26/17 4:50 PM; L2 Baseline = A @ 6/26/17 4:50 PM; Ar40 = L @ 6/26/17 4:50 PM; Ar39 = L @ 6/26/17 4:50 PM; Ar38 = L @ 6/26/17 4:50 PM; Ar37 = L @ 6/26/17 4:50 PM; Ar36 = L @ 6/26/17 4:50 PM; Ar41 bk val,er = @ 6/26/17 5:01 PM; Average background @ 6/26/17 5:01 PM; Ar40 bk va…		LLLLLLAAAAAA	1	Pychron Script	1	Fusions CO2	4.5	0	0	0	0	30	30	58			0
	06	4.5	3.43579	0.0128999	0.1173	2.13956	39.551	99.0189	17.3719	0.0078594	0.0031037								65697-06	RC15-HWW-107	37	2017-06-25	17.7667	3581258000	RCrow	Sanidine	29	IR962		129.138.12.160	7.875	H2 Baseline = A @ 6/26/17 4:49 PM; H1 Baseline = A @ 6/26/17 4:49 PM; AX Baseline = A @ 6/26/17 4:49 PM; L1 Baseline = A @ 6/26/17 4:49 PM; L2 Baseline = A @ 6/26/17 4:49 PM; Ar40 = P @ 6/26/17 4:49 PM; Ar39 = P @ 6/26/17 4:49 PM; Ar38 = L @ 6/26/17 4:49 PM; Ar37 = L @ 6/26/17 4:49 PM; Ar36 = P @ 6/26/17 4:49 PM; H2 Baseline = A @ 6/26/17 4:51 PM; H1 Baseline = A @ 6/26/17 4:51 PM; AX Baseline = …	J:29	LLLLLLAAAAAA	1	Pychron Script	1	Fusions CO2	4.5	0	0	0	0	30	30	13			0
	44	4.5	3.43378	0.0162129	0.1046	0.794355	31.469	99.1364	17.3823	0.0563911	0.0031037								65697-44	RC15-HWW-107	37	2017-06-26	0.816667	3581283000	RCrow	Sanidine	29	IR962		129.138.12.160	7.875	H2 Baseline = A @ 6/26/17 4:50 PM; H1 Baseline = A @ 6/26/17 4:50 PM; AX Baseline = A @ 6/26/17 4:50 PM; L1 Baseline = A @ 6/26/17 4:50 PM; L2 Baseline = A @ 6/26/17 4:50 PM; Ar40 = L @ 6/26/17 4:50 PM; Ar39 = L @ 6/26/17 4:50 PM; Ar38 = L @ 6/26/17 4:50 PM; Ar37 = L @ 6/26/17 4:50 PM; Ar36 = L @ 6/26/17 4:50 PM; Ar41 bk val,er = @ 6/26/17 5:01 PM; Average background @ 6/26/17 5:01 PM; Ar40 bk va…		LLLLLLAAAAAA	1	Pychron Script	1	Fusions CO2	4.5	0	0	0	0	30	30	51			0
	103	4.5	3.54159	0.008697	0.464	0.526399	58.6644	96.1395	17.3874	0.0845396	0.0031037								65697-103	RC15-HWW-107	37	2017-06-26	9.6	3581315000	RCrow	Sanidine	29	IR962		129.138.12.160	7.875	H2 Baseline = A @ 6/26/17 4:52 PM; H1 Baseline = A @ 6/26/17 4:52 PM; AX Baseline = A @ 6/26/17 4:52 PM; L1 Baseline = A @ 6/26/17 4:52 PM; L2 Baseline = A @ 6/26/17 4:52 PM; Ar40 = L @ 6/26/17 4:52 PM; Ar39 = L @ 6/26/17 4:52 PM; Ar38 = L @ 6/26/17 4:52 PM; Ar37 = L @ 6/26/17 4:52 PM; Ar36 = L @ 6/26/17 4:52 PM; Ar41 bk val,er = @ 6/26/17 5:01 PM; Average background @ 6/26/17 5:01 PM; Ar40 bk va…	J:29	LLLLLLAAAAAA	1	Pychron Script	1	Fusions CO2	4.5	0	0	0	0	30	30	112			0
	63	4.5	4.0659	0.0263396	2.2202	0.332238	19.3702	83.8792	17.4215	0.19483	0.0031037								65697-63	RC15-HWW-107	37	2017-06-26	4.05	3581295000	RCrow	Sanidine	29	IR962		129.138.12.160	7.875	H2 Baseline = A @ 6/26/17 4:50 PM; H1 Baseline = A @ 6/26/17 4:50 PM; AX Baseline = A @ 6/26/17 4:50 PM; L1 Baseline = A @ 6/26/17 4:50 PM; L2 Baseline = A @ 6/26/17 4:50 PM; Ar40 = L @ 6/26/17 4:50 PM; Ar39 = L @ 6/26/17 4:50 PM; Ar38 = L @ 6/26/17 4:50 PM; Ar37 = L @ 6/26/17 4:50 PM; Ar36 = L @ 6/26/17 4:50 PM; Ar41 bk val,er = @ 6/26/17 5:01 PM; Average background @ 6/26/17 5:01 PM; Ar40 bk va…		LLLLLLAAAAAA	1	Pychron Script	1	Fusions CO2	4.5	0	0	0	0	30	30	70			0
	60	4.5	3.45144	0.132372	0.1656	0.337799	3.85433	98.8935	17.4304	0.128452	0.0031037								65697-60	RC15-HWW-107	37	2017-06-26	2.91667	3581291000	RCrow	Sanidine	29	IR962		129.138.12.160	7.875	H2 Baseline = A @ 6/26/17 4:50 PM; H1 Baseline = A @ 6/26/17 4:50 PM; AX Baseline = A @ 6/26/17 4:50 PM; L1 Baseline = A @ 6/26/17 4:50 PM; L2 Baseline = A @ 6/26/17 4:50 PM; Ar40 = L @ 6/26/17 4:50 PM; Ar39 = L @ 6/26/17 4:50 PM; Ar38 = L @ 6/26/17 4:50 PM; Ar37 = L @ 6/26/17 4:50 PM; Ar36 = L @ 6/26/17 4:50 PM; Ar41 bk val,er = @ 6/26/17 5:01 PM; Average background @ 6/26/17 5:01 PM; Ar40 bk va…		LLLLLLAAAAAA	1	Pychron Script	1	Fusions CO2	4.5	0	0	0	0	30	30	67			0
	01	4.5	3.46801	0.0274798	0.19	0.602641	18.5665	98.4409	17.4328	0.0373448	0.0031037								65697-01	RC15-HWW-107	37	2017-06-25	15.9833	3581251000	RCrow	Sanidine	29	IR962		129.138.12.160	7.875	H2 Baseline = A @ 6/26/17 4:49 PM; H1 Baseline = A @ 6/26/17 4:49 PM; AX Baseline = A @ 6/26/17 4:49 PM; L1 Baseline = A @ 6/26/17 4:49 PM; L2 Baseline = A @ 6/26/17 4:49 PM; Ar40 = P @ 6/26/17 4:49 PM; Ar39 = P @ 6/26/17 4:49 PM; Ar38 = L @ 6/26/17 4:49 PM; Ar37 = L @ 6/26/17 4:49 PM; Ar36 = P @ 6/26/17 4:49 PM; H2 Baseline = A @ 6/26/17 4:50 PM; H1 Baseline = A @ 6/26/17 4:50 PM; AX Baseline = …	J:29	ALLLLLAAAAAA	1	Pychron Script	1	Fusions CO2	4.5	0	0	0	0	30	30	8			0
	87	4.5	3.45784	0.0375784	0.1383	0.327498	13.5771	98.9044	17.4634	0.125596	0.0031037								65697-87	RC15-HWW-107	37	2017-06-26	7.48333	3581307000	RCrow	Sanidine	29	IR962		129.138.12.160	7.875	H2 Baseline = A @ 6/26/17 4:52 PM; H1 Baseline = A @ 6/26/17 4:52 PM; AX Baseline = A @ 6/26/17 4:52 PM; L1 Baseline = A @ 6/26/17 4:52 PM; L2 Baseline = A @ 6/26/17 4:52 PM; Ar40 = L @ 6/26/17 4:52 PM; Ar39 = L @ 6/26/17 4:52 PM; Ar38 = L @ 6/26/17 4:52 PM; Ar37 = L @ 6/26/17 4:52 PM; Ar36 = L @ 6/26/17 4:52 PM; Ar41 bk val,er = @ 6/26/17 5:01 PM; Average background @ 6/26/17 5:01 PM; Ar40 bk va…	J:29	LLLLLLAAAAAA	1	Pychron Script	1	Fusions CO2	4.5	0	0	0	0	30	30	96			0
	11	4.5	3.45903	0.0188483	0.1239	0.711655	27.069	98.9824	17.4828	0.0200158	0.0031037								65697-11	RC15-HWW-107	37	2017-06-25	19.25	3581263000	RCrow	Sanidine	29	IR962		129.138.12.160	7.875	H2 Baseline = A @ 6/26/17 4:49 PM; H1 Baseline = A @ 6/26/17 4:49 PM; AX Baseline = A @ 6/26/17 4:49 PM; L1 Baseline = A @ 6/26/17 4:49 PM; L2 Baseline = A @ 6/26/17 4:49 PM; Ar40 = P @ 6/26/17 4:49 PM; Ar39 = P @ 6/26/17 4:49 PM; Ar38 = L @ 6/26/17 4:49 PM; Ar37 = L @ 6/26/17 4:49 PM; Ar36 = P @ 6/26/17 4:49 PM; H2 Baseline = A @ 6/26/17 4:51 PM; H1 Baseline = A @ 6/26/17 4:51 PM; AX Baseline = …	J:29	LLLLLLAAAAAA	1	Pychron Script	1	Fusions CO2	4.5	0	0	0	0	30	30	18			0
	13	4.5	3.51763	0.0182351	0.297	0.45926	27.9792	97.542	17.5208	0.036962	0.0031037								65697-13	RC15-HWW-107	37	2017-06-25	19.4833	3581264000	RCrow	Sanidine	29	IR962		129.138.12.160	7.875	H2 Baseline = A @ 6/26/17 4:49 PM; H1 Baseline = A @ 6/26/17 4:49 PM; AX Baseline = A @ 6/26/17 4:49 PM; L1 Baseline = A @ 6/26/17 4:49 PM; L2 Baseline = A @ 6/26/17 4:49 PM; Ar40 = P @ 6/26/17 4:49 PM; Ar39 = P @ 6/26/17 4:49 PM; Ar38 = L @ 6/26/17 4:49 PM; Ar37 = L @ 6/26/17 4:49 PM; Ar36 = P @ 6/26/17 4:49 PM; H2 Baseline = A @ 6/26/17 4:51 PM; H1 Baseline = A @ 6/26/17 4:51 PM; AX Baseline = …	J:29	LLLLLLAAAAAA	1	Pychron Script	1	Fusions CO2	4.5	0	0	0	0	30	30	20			0
	16	4.5	3.69697	0.0360107	0.8913	0.222492	14.1681	92.9397	17.5475	0.215694	0.0031037								65697-16	RC15-HWW-107	37	2017-06-25	20.0667	3581266000	RCrow	Sanidine	29	IR962		129.138.12.160	7.875	H2 Baseline = A @ 6/26/17 4:49 PM; H1 Baseline = A @ 6/26/17 4:49 PM; AX Baseline = A @ 6/26/17 4:49 PM; L1 Baseline = A @ 6/26/17 4:49 PM; L2 Baseline = A @ 6/26/17 4:49 PM; Ar40 = P @ 6/26/17 4:49 PM; Ar39 = P @ 6/26/17 4:49 PM; Ar38 = L @ 6/26/17 4:49 PM; Ar37 = L @ 6/26/17 4:49 PM; Ar36 = P @ 6/26/17 4:49 PM; H2 Baseline = A @ 6/26/17 4:51 PM; H1 Baseline = A @ 6/26/17 4:51 PM; AX Baseline = …	J:29	LLLLLLAAAAAA	1	Pychron Script	1	Fusions CO2	4.5	0	0	0	0	30	30	23			0
	05	4.5	3.97757	0.0411817	1.8396	0.246456	12.3891	86.3873	17.5513	0.0679154	0.0031037								65697-05	RC15-HWW-107	37	2017-06-25	17.55	3581257000	RCrow	Sanidine	29	IR962		129.138.12.160	7.875	H2 Baseline = A @ 6/26/17 4:49 PM; H1 Baseline = A @ 6/26/17 4:49 PM; AX Baseline = A @ 6/26/17 4:49 PM; L1 Baseline = A @ 6/26/17 4:49 PM; L2 Baseline = A @ 6/26/17 4:49 PM; Ar40 = P @ 6/26/17 4:49 PM; Ar39 = P @ 6/26/17 4:49 PM; Ar38 = L @ 6/26/17 4:49 PM; Ar37 = L @ 6/26/17 4:49 PM; Ar36 = P @ 6/26/17 4:49 PM; H2 Baseline = A @ 6/26/17 4:51 PM; H1 Baseline = A @ 6/26/17 4:51 PM; AX Baseline = …	J:29	LLLLLLAAAAAA	1	Pychron Script	1	Fusions CO2	4.5	0	0	0	0	30	30	12			0
	55	4.5	3.85167	0.0208552	1.3861	0.150295	24.4641	89.3826	17.5834	0.29736	0.0031037								65697-55	RC15-HWW-107	37	2017-06-26	2.35	3581288000	RCrow	Sanidine	29	IR962		129.138.12.160	7.875	H2 Baseline = A @ 6/26/17 4:50 PM; H1 Baseline = A @ 6/26/17 4:50 PM; AX Baseline = A @ 6/26/17 4:50 PM; L1 Baseline = A @ 6/26/17 4:50 PM; L2 Baseline = A @ 6/26/17 4:50 PM; Ar40 = L @ 6/26/17 4:50 PM; Ar39 = L @ 6/26/17 4:50 PM; Ar38 = L @ 6/26/17 4:50 PM; Ar37 = L @ 6/26/17 4:50 PM; Ar36 = L @ 6/26/17 4:50 PM; Ar41 bk val,er = @ 6/26/17 5:01 PM; Average background @ 6/26/17 5:01 PM; Ar40 bk va…		LLLLLLAAAAAA	1	Pychron Script	1	Fusions CO2	4.5	0	0	0	0	30	30	62			0
	80	4.5	5.40033	0.0544612	6.6358	0.461758	9.36821	63.7138	17.5853	0.192662	0.0031037								65697-80	RC15-HWW-107	37	2017-06-26	6.86667	3581305000	RCrow	Sanidine	29	IR962		129.138.12.160	7.875	H2 Baseline = A @ 6/26/17 4:50 PM; H1 Baseline = A @ 6/26/17 4:50 PM; AX Baseline = A @ 6/26/17 4:50 PM; L1 Baseline = A @ 6/26/17 4:50 PM; L2 Baseline = A @ 6/26/17 4:50 PM; Ar40 = L @ 6/26/17 4:50 PM; Ar39 = L @ 6/26/17 4:50 PM; Ar38 = L @ 6/26/17 4:50 PM; Ar37 = L @ 6/26/17 4:50 PM; Ar36 = L @ 6/26/17 4:50 PM; Ar41 bk val,er = @ 6/26/17 5:01 PM; Average background @ 6/26/17 5:01 PM; Ar40 bk va…		LLLLLLAAAAAA	1	Pychron Script	1	Fusions CO2	4.5	0	0	0	0	30	30	88			0
	67	4.5	11.1981	0.0298362	26.2249	0.285098	17.1002	30.7647	17.6217	0.500271	0.0031037								65697-67	RC15-HWW-107	37	2017-06-26	4.4	3581296000	RCrow	Sanidine	29	IR962		129.138.12.160	7.875	H2 Baseline = A @ 6/26/17 4:50 PM; H1 Baseline = A @ 6/26/17 4:50 PM; AX Baseline = A @ 6/26/17 4:50 PM; L1 Baseline = A @ 6/26/17 4:50 PM; L2 Baseline = A @ 6/26/17 4:50 PM; Ar40 = L @ 6/26/17 4:50 PM; Ar39 = L @ 6/26/17 4:50 PM; Ar38 = L @ 6/26/17 4:50 PM; Ar37 = L @ 6/26/17 4:50 PM; Ar36 = L @ 6/26/17 4:50 PM; Ar41 bk val,er = @ 6/26/17 5:01 PM; Average background @ 6/26/17 5:01 PM; Ar40 bk va…		LLLLLLAAAAAA	1	Pychron Script	1	Fusions CO2	4.5	0	0	0	0	30	30	74			0
	77	4.5	3.94261	0.0279733	1.6689	0.14485	18.239	87.5271	17.6258	0.319459	0.0031037								65697-77	RC15-HWW-107	37	2017-06-26	6.16667	3581302000	RCrow	Sanidine	29	IR962		129.138.12.160	7.875	H2 Baseline = A @ 6/26/17 4:50 PM; H1 Baseline = A @ 6/26/17 4:50 PM; AX Baseline = A @ 6/26/17 4:50 PM; L1 Baseline = A @ 6/26/17 4:50 PM; L2 Baseline = A @ 6/26/17 4:50 PM; Ar40 = L @ 6/26/17 4:50 PM; Ar39 = L @ 6/26/17 4:50 PM; Ar38 = L @ 6/26/17 4:50 PM; Ar37 = L @ 6/26/17 4:50 PM; Ar36 = L @ 6/26/17 4:50 PM; Ar41 bk val,er = @ 6/26/17 5:01 PM; Average background @ 6/26/17 5:01 PM; Ar40 bk va…		LLLLLLAAAAAA	1	Pychron Script	1	Fusions CO2	4.5	0	0	0	0	30	30	85			0
	68	4.5	3.53104	0.0108961	0.2425	0.250143	46.8245	97.9941	17.6685	0.161495	0.0031037								65697-68	RC15-HWW-107	37	2017-06-26	4.48333	3581296000	RCrow	Sanidine	29	IR962		129.138.12.160	7.875	H2 Baseline = A @ 6/26/17 4:50 PM; H1 Baseline = A @ 6/26/17 4:50 PM; AX Baseline = A @ 6/26/17 4:50 PM; L1 Baseline = A @ 6/26/17 4:50 PM; L2 Baseline = A @ 6/26/17 4:50 PM; Ar40 = L @ 6/26/17 4:50 PM; Ar39 = L @ 6/26/17 4:50 PM; Ar38 = L @ 6/26/17 4:50 PM; Ar37 = L @ 6/26/17 4:50 PM; Ar36 = L @ 6/26/17 4:50 PM; Ar41 bk val,er = @ 6/26/17 5:01 PM; Average background @ 6/26/17 5:01 PM; Ar40 bk va…		LLLLLLAAAAAA	1	Pychron Script	1	Fusions CO2	4.5	0	0	0	0	30	30	75			0
	99	4.5	4.5423	0.040616	3.6642	0.197963	12.5617	76.1925	17.6821	0.272179	0.0031037								65697-99	RC15-HWW-107	37	2017-06-26	9.25	3581313000	RCrow	Sanidine	29	IR962		129.138.12.160	7.875	H2 Baseline = A @ 6/26/17 4:52 PM; H1 Baseline = A @ 6/26/17 4:52 PM; AX Baseline = A @ 6/26/17 4:52 PM; L1 Baseline = A @ 6/26/17 4:52 PM; L2 Baseline = A @ 6/26/17 4:52 PM; Ar40 = L @ 6/26/17 4:52 PM; Ar39 = L @ 6/26/17 4:52 PM; Ar38 = L @ 6/26/17 4:52 PM; Ar37 = L @ 6/26/17 4:52 PM; Ar36 = L @ 6/26/17 4:52 PM; Ar41 bk val,er = @ 6/26/17 5:01 PM; Average background @ 6/26/17 5:01 PM; Ar40 bk va…	J:29	LLLLLLAAAAAA	1	Pychron Script	1	Fusions CO2	4.5	0	0	0	0	30	30	108			0
	97	4.5	4.01563	0.0084119	1.7655	0.112696	60.6526	87.0043	17.8443	0.37577	0.0031037								65697-97	RC15-HWW-107	37	2017-06-26	9.08333	3581313000	RCrow	Sanidine	29	IR962		129.138.12.160	7.875	H2 Baseline = A @ 6/26/17 4:52 PM; H1 Baseline = A @ 6/26/17 4:52 PM; AX Baseline = A @ 6/26/17 4:52 PM; L1 Baseline = A @ 6/26/17 4:52 PM; L2 Baseline = A @ 6/26/17 4:52 PM; Ar40 = L @ 6/26/17 4:52 PM; Ar39 = L @ 6/26/17 4:52 PM; Ar38 = L @ 6/26/17 4:52 PM; Ar37 = L @ 6/26/17 4:52 PM; Ar36 = L @ 6/26/17 4:52 PM; Ar41 bk val,er = @ 6/26/17 5:01 PM; Average background @ 6/26/17 5:01 PM; Ar40 bk va…	J:29	LLLLLLAAAAAA	1	Pychron Script	1	Fusions CO2	4.5	0	0	0	0	30	30	106			0
	22	4.5	3.72963	0.0361064	0.7083	0.299784	14.1306	94.458	17.9899	0.137003	0.0031037								65697-22	RC15-HWW-107	37	2017-06-25	21.3167	3581270000	RCrow	Sanidine	29	IR962		129.138.12.160	7.875	H2 Baseline = A @ 6/26/17 4:49 PM; H1 Baseline = A @ 6/26/17 4:49 PM; AX Baseline = A @ 6/26/17 4:49 PM; L1 Baseline = A @ 6/26/17 4:49 PM; L2 Baseline = A @ 6/26/17 4:49 PM; Ar40 = P @ 6/26/17 4:49 PM; Ar39 = P @ 6/26/17 4:49 PM; Ar38 = L @ 6/26/17 4:49 PM; Ar37 = L @ 6/26/17 4:49 PM; Ar36 = P @ 6/26/17 4:49 PM; H2 Baseline = A @ 6/26/17 4:51 PM; H1 Baseline = A @ 6/26/17 4:51 PM; AX Baseline = …	J:29	LLLLLLAAAAAA	1	Pychron Script	1	Fusions CO2	4.5	0	0	0	0	30	30	29			0
	35	4.5	3.59668	0.0222915	0.171	0.160333	22.8878	98.6467	18.1156	0.239754	0.0031037								65697-35	RC15-HWW-107	37	2017-06-25	23.0167	3581277000	RCrow	Sanidine	29	IR962		129.138.12.160	7.875	H2 Baseline = A @ 6/26/17 4:49 PM; H1 Baseline = A @ 6/26/17 4:49 PM; AX Baseline = A @ 6/26/17 4:49 PM; L1 Baseline = A @ 6/26/17 4:49 PM; L2 Baseline = A @ 6/26/17 4:49 PM; Ar40 = P @ 6/26/17 4:49 PM; Ar39 = P @ 6/26/17 4:49 PM; Ar38 = L @ 6/26/17 4:49 PM; Ar37 = L @ 6/26/17 4:49 PM; Ar36 = P @ 6/26/17 4:49 PM; H2 Baseline = A @ 6/26/17 4:51 PM; H1 Baseline = A @ 6/26/17 4:51 PM; AX Baseline = …	J:29	LLLLLLAAAAAA	1	Pychron Script	1	Fusions CO2	4.5	0	0	0	0	30	30	42			0
	92	4.5	3.62405	0.0049773	0.2312	0.489766	102.506	98.1223	18.1563	0.0929239	0.0031037								65697-92	RC15-HWW-107	37	2017-06-26	8.4	3581310000	RCrow	Sanidine	29	IR962		129.138.12.160	7.875	H2 Baseline = A @ 6/26/17 4:52 PM; H1 Baseline = A @ 6/26/17 4:52 PM; AX Baseline = A @ 6/26/17 4:52 PM; L1 Baseline = A @ 6/26/17 4:52 PM; L2 Baseline = A @ 6/26/17 4:52 PM; Ar40 = L @ 6/26/17 4:52 PM; Ar39 = L @ 6/26/17 4:52 PM; Ar38 = L @ 6/26/17 4:52 PM; Ar37 = L @ 6/26/17 4:52 PM; Ar36 = L @ 6/26/17 4:52 PM; Ar41 bk val,er = @ 6/26/17 5:01 PM; Average background @ 6/26/17 5:01 PM; Ar40 bk va…	J:29	LLLLLLAAAAAA	1	Pychron Script	1	Fusions CO2	4.5	0	0	0	0	30	30	101			0
	74	4.5	3.57644	0.0081244	0.0361	2.1526	62.799	99.7193	18.2086	0.0231948	0.0031037								65697-74	RC15-HWW-107	37	2017-06-26	5.65	3581300000	RCrow	Sanidine	29	IR962		129.138.12.160	7.875	H2 Baseline = A @ 6/26/17 4:50 PM; H1 Baseline = A @ 6/26/17 4:50 PM; AX Baseline = A @ 6/26/17 4:50 PM; L1 Baseline = A @ 6/26/17 4:50 PM; L2 Baseline = A @ 6/26/17 4:50 PM; Ar40 = L @ 6/26/17 4:50 PM; Ar39 = L @ 6/26/17 4:50 PM; Ar38 = L @ 6/26/17 4:50 PM; Ar37 = L @ 6/26/17 4:50 PM; Ar36 = L @ 6/26/17 4:50 PM; Ar41 bk val,er = @ 6/26/17 5:01 PM; Average background @ 6/26/17 5:01 PM; Ar40 bk va…		LLLLLLAAAAAA	1	Pychron Script	1	Fusions CO2	4.5	0	0	0	0	30	30	81			0
	84	4.5	3.57485	0.0131655	0.0173	0.668556	38.7531	99.8873	18.2311	0.0587121	0.0031037								65697-84	RC15-HWW-107	37	2017-06-26	7.21667	3581306000	RCrow	Sanidine	29	IR962		129.138.12.160	7.875	H2 Baseline = A @ 6/26/17 4:52 PM; H1 Baseline = A @ 6/26/17 4:52 PM; AX Baseline = A @ 6/26/17 4:52 PM; L1 Baseline = A @ 6/26/17 4:52 PM; L2 Baseline = A @ 6/26/17 4:52 PM; Ar40 = L @ 6/26/17 4:52 PM; Ar39 = L @ 6/26/17 4:52 PM; Ar38 = L @ 6/26/17 4:52 PM; Ar37 = L @ 6/26/17 4:52 PM; Ar36 = L @ 6/26/17 4:52 PM; Ar41 bk val,er = @ 6/26/17 5:01 PM; Average background @ 6/26/17 5:01 PM; Ar40 bk va…	J:29	LLLLLLAAAAAA	1	Pychron Script	1	Fusions CO2	4.5	0	0	0	0	30	30	92			0
	41	4.5	3.801	0.018943	0.6467	0.531353	26.9336	95.0011	18.4379	0.0969679	0.0031037								65697-41	RC15-HWW-107	37	2017-06-26	0.55	3581282000	RCrow	Sanidine	29	IR962		129.138.12.160	7.875	H2 Baseline = A @ 6/26/17 4:50 PM; H1 Baseline = A @ 6/26/17 4:50 PM; AX Baseline = A @ 6/26/17 4:50 PM; L1 Baseline = A @ 6/26/17 4:50 PM; L2 Baseline = A @ 6/26/17 4:50 PM; Ar40 = L @ 6/26/17 4:50 PM; Ar39 = L @ 6/26/17 4:50 PM; Ar38 = L @ 6/26/17 4:50 PM; Ar37 = L @ 6/26/17 4:50 PM; Ar36 = L @ 6/26/17 4:50 PM; Ar41 bk val,er = @ 6/26/17 5:01 PM; Average background @ 6/26/17 5:01 PM; Ar40 bk va…		LLLLLLAAAAAA	1	Pychron Script	1	Fusions CO2	4.5	0	0	0	0	30	30	48			0
	79	4.5	3.89155	0.0175944	0.9134	0.579268	28.9981	93.085	18.4971	0.0851776	0.0031037								65697-79	RC15-HWW-107	37	2017-06-26	6.35	3581303000	RCrow	Sanidine	29	IR962		129.138.12.160	7.875	H2 Baseline = A @ 6/26/17 4:50 PM; H1 Baseline = A @ 6/26/17 4:50 PM; AX Baseline = A @ 6/26/17 4:50 PM; L1 Baseline = A @ 6/26/17 4:50 PM; L2 Baseline = A @ 6/26/17 4:50 PM; Ar40 = L @ 6/26/17 4:50 PM; Ar39 = L @ 6/26/17 4:50 PM; Ar38 = L @ 6/26/17 4:50 PM; Ar37 = L @ 6/26/17 4:50 PM; Ar36 = L @ 6/26/17 4:50 PM; Ar41 bk val,er = @ 6/26/17 5:01 PM; Average background @ 6/26/17 5:01 PM; Ar40 bk va…		LLLLLLAAAAAA	1	Pychron Script	1	Fusions CO2	4.5	0	0	0	0	30	30	87			0
	32	4.5	3.95314	0.0183904	1.0406	0.354111	27.743	92.2433	18.62	0.165967	0.0031037								65697-32	RC15-HWW-107	37	2017-06-25	22.75	3581276000	RCrow	Sanidine	29	IR962		129.138.12.160	7.875	H2 Baseline = A @ 6/26/17 4:49 PM; H1 Baseline = A @ 6/26/17 4:49 PM; AX Baseline = A @ 6/26/17 4:49 PM; L1 Baseline = A @ 6/26/17 4:49 PM; L2 Baseline = A @ 6/26/17 4:49 PM; Ar40 = P @ 6/26/17 4:49 PM; Ar39 = P @ 6/26/17 4:49 PM; Ar38 = L @ 6/26/17 4:49 PM; Ar37 = L @ 6/26/17 4:49 PM; Ar36 = P @ 6/26/17 4:49 PM; H2 Baseline = A @ 6/26/17 4:51 PM; H1 Baseline = A @ 6/26/17 4:51 PM; AX Baseline = …	J:29	LLLLLLAAAAAA	1	Pychron Script	1	Fusions CO2	4.5	0	0	0	0	30	30	39			0
	100	4.5	5.66528	0.0113476	0.1376	0.574632	44.9614	99.2979	28.6656	0.0781607	0.0031037								65697-100	RC15-HWW-107	37	2017-06-26	9.35	3581314000	RCrow	Sanidine	29	IR962		129.138.12.160	7.875	H2 Baseline = A @ 6/26/17 4:52 PM; H1 Baseline = A @ 6/26/17 4:52 PM; AX Baseline = A @ 6/26/17 4:52 PM; L1 Baseline = A @ 6/26/17 4:52 PM; L2 Baseline = A @ 6/26/17 4:52 PM; Ar40 = L @ 6/26/17 4:52 PM; Ar39 = L @ 6/26/17 4:52 PM; Ar38 = L @ 6/26/17 4:52 PM; Ar37 = L @ 6/26/17 4:52 PM; Ar36 = L @ 6/26/17 4:52 PM; Ar41 bk val,er = @ 6/26/17 5:01 PM; Average background @ 6/26/17 5:01 PM; Ar40 bk va…	J:29	LLLLLLAAAAAA	1	Pychron Script	1	Fusions CO2	4.5	0	0	0	0	30	30	109			0
	38	4.5	5.83958	0.0179667	0.3781	1.00585	28.3972	98.1095	29.1912	0.0601245	0.0031037								65697-38	RC15-HWW-107	37	2017-06-25	23.4167	3581278000	RCrow	Sanidine	29	IR962		129.138.12.160	7.875	H2 Baseline = A @ 6/26/17 4:49 PM; H1 Baseline = A @ 6/26/17 4:49 PM; AX Baseline = A @ 6/26/17 4:49 PM; L1 Baseline = A @ 6/26/17 4:49 PM; L2 Baseline = A @ 6/26/17 4:49 PM; Ar40 = P @ 6/26/17 4:49 PM; Ar39 = P @ 6/26/17 4:49 PM; Ar38 = L @ 6/26/17 4:49 PM; Ar37 = L @ 6/26/17 4:49 PM; Ar36 = P @ 6/26/17 4:49 PM; H2 Baseline = A @ 6/26/17 4:51 PM; H1 Baseline = A @ 6/26/17 4:51 PM; AX Baseline = …	J:29	LLLLLLAAAAAA	1	Pychron Script	1	Fusions CO2	4.5	0	0	0	0	30	30	45			0
	107	4.5	14.3012	-0.0041609	1.1477	0.519728	-	97.6252	70.3982	0.198095	0.0031037								65697-107	RC15-HWW-107	37	2017-06-26	10.2833	3581317000	RCrow	Sanidine	29	IR962		129.138.12.160	7.875	H2 Baseline = A @ 6/26/17 4:52 PM; H1 Baseline = A @ 6/26/17 4:52 PM; AX Baseline = A @ 6/26/17 4:52 PM; L1 Baseline = A @ 6/26/17 4:52 PM; L2 Baseline = A @ 6/26/17 4:52 PM; Ar40 = L @ 6/26/17 4:52 PM; Ar39 = L @ 6/26/17 4:52 PM; Ar38 = L @ 6/26/17 4:52 PM; Ar37 = L @ 6/26/17 4:52 PM; Ar36 = L @ 6/26/17 4:52 PM; Ar41 bk val,er = @ 6/26/17 5:01 PM; Average background @ 6/26/17 5:01 PM; Ar40 bk va…	J:29	LLLLLLAAAAAA	1	Pychron Script	1	Fusions CO2	4.5	0	0	0	0	30	30	116			0
	03	4.5	209.495	-0.0008866	0.2979	1.06841	-	99.958	847.031	0.7809	0.0031037								65697-03	RC15-HWW-107	37	2017-06-25	17.1333	3581255000	RCrow	Sanidine	29	IR962		129.138.12.160	7.875	H2 Baseline = A @ 6/26/17 4:49 PM; H1 Baseline = A @ 6/26/17 4:49 PM; AX Baseline = A @ 6/26/17 4:49 PM; L1 Baseline = A @ 6/26/17 4:49 PM; L2 Baseline = A @ 6/26/17 4:49 PM; Ar40 = P @ 6/26/17 4:49 PM; Ar39 = P @ 6/26/17 4:49 PM; Ar38 = L @ 6/26/17 4:49 PM; Ar37 = L @ 6/26/17 4:49 PM; Ar36 = P @ 6/26/17 4:49 PM; H2 Baseline = A @ 6/26/17 4:51 PM; H1 Baseline = A @ 6/26/17 4:51 PM; AX Baseline = …	J:29	LLLLLLAAAAAA	1	Pychron Script	1	Fusions CO2	4.5	0	0	0	0	30	30	10			0
	12	4.5	220.638	0.0057358	0.0929	1.00242	88.9508	99.9878	882.961	0.8907	0.0031037								65697-12	RC15-HWW-107	37	2017-06-25	19.3333	3581263000	RCrow	Sanidine	29	IR962		129.138.12.160	7.875	H2 Baseline = A @ 6/26/17 4:49 PM; H1 Baseline = A @ 6/26/17 4:49 PM; AX Baseline = A @ 6/26/17 4:49 PM; L1 Baseline = A @ 6/26/17 4:49 PM; L2 Baseline = A @ 6/26/17 4:49 PM; Ar40 = P @ 6/26/17 4:49 PM; Ar39 = P @ 6/26/17 4:49 PM; Ar38 = L @ 6/26/17 4:49 PM; Ar37 = L @ 6/26/17 4:49 PM; Ar36 = P @ 6/26/17 4:49 PM; H2 Baseline = A @ 6/26/17 4:51 PM; H1 Baseline = A @ 6/26/17 4:51 PM; AX Baseline = …	J:29	LLLLLLAAAAAA	1	Pychron Script	1	Fusions CO2	4.5	0	0	0	0	30	30	19			0
	89	4.5	289.001	0.0167055	0.5453	0.44856	30.5411	99.9448	1087.73	3.78559	0.0031037								65697-89	RC15-HWW-107	37	2017-06-26	8.11667	3581309000	RCrow	Sanidine	29	IR962		129.138.12.160	7.875	H2 Baseline = A @ 6/26/17 4:52 PM; H1 Baseline = A @ 6/26/17 4:52 PM; AX Baseline = A @ 6/26/17 4:52 PM; L1 Baseline = A @ 6/26/17 4:52 PM; L2 Baseline = A @ 6/26/17 4:52 PM; Ar40 = L @ 6/26/17 4:52 PM; Ar39 = L @ 6/26/17 4:52 PM; Ar38 = L @ 6/26/17 4:52 PM; Ar37 = L @ 6/26/17 4:52 PM; Ar36 = L @ 6/26/17 4:52 PM; Ar41 bk val,er = @ 6/26/17 5:01 PM; Average background @ 6/26/17 5:01 PM; Ar40 bk va…	J:29	LLLLLLAAAAAA	1	Pychron Script	1	Fusions CO2	4.5	0	0	0	0	30	30	98			0
				n=86
	RC15-SW-95, Sanidine, J=0.0039471±0.02%, IC=1.025±0.001, NM-284C, Lab#=65081, Argus VI
	100	4	0.741008	0.0144576	0.3706	0.679006	35.2897	85.219	4.51065	0.0214111	1e-20								65081-100	RC15-SW-95	37	2016-07-21	8.1	3551933000	RCrow	Sanidine	18	IR962		129.138.12.160	7.875		C:18 Detrital San	ALLLLLAAAAAA	1	Pychron Script	1	Fusions CO2	4	4	0	4	0	30	30	123			0
	121	4	1.21694	0.0236183	0.9664	0.935625	21.6021	76.5371	6.67585	0.0242057	1e-20								65081-121	RC15-SW-95	37	2016-07-21	13.1167	3551951000	RCrow	Sanidine	18	IR962		129.138.12.160	7.875		C:18 Detrital San	ALLLLLAAAAAA	1	Pychron Script	1	Fusions CO2	4	4	0	4	0	30	30	144			0
	125	4	3.03424	0.016398	6.1333	0.0636357	31.1138	40.163	8.76211	0.324487	1e-20								65081-125	RC15-SW-95	37	2016-07-21	14.2	3551955000	RCrow	Sanidine	18	IR962		129.138.12.160	7.875		C:18 Detrital San	ALLLLLAAAAAA	1	Pychron Script	1	Fusions CO2	4	4	0	4	0	30	30	148			0
	36	4	1.95543	0.0242344	0.0518	1.28573	21.0529	99.3088	13.9238	0.0153597	1e-20								65081-36	RC15-SW-95	37	2016-07-20	4.7	3551835000	RCrow	Sanidine	18	IR962		129.138.12.160	7.875		C:18 Detrital San	ALLLLLAAAAAA	1	Pychron Script	1	Fusions CO2	4	4	0	4	0	30	30	58			0
	71	4	2.00112	0.0312563	0.2074	0.691652	16.3232	97.0456	13.9256	0.0285735	1e-20								65081-71	RC15-SW-95	37	2016-07-20	13.8667	3551868000	RCrow	Sanidine	18	IR962		129.138.12.160	7.875		C:18 Detrital San	ALLLLLAAAAAA	1	Pychron Script	1	Fusions CO2	4	4	0	4	0	30	30	93			0
	98	4	2.55471	0.0064916	0.4298	0.466003	78.5945	95.0333	17.4067	0.0337609	1e-20								65081-98	RC15-SW-95	37	2016-07-21	7.66667	3551932000	RCrow	Sanidine	18	IR962		129.138.12.160	7.875		C:18 Detrital San	ALLLLLAAAAAA	1	Pychron Script	1	Fusions CO2	4	4	0	4	0	30	30	121			0
	90	4	2.66502	0.0119239	0.2894	1.61945	42.7883	96.8158	18.4958	0.0146559	1e-20								65081-90	RC15-SW-95	37	2016-07-20	18.9667	3551886000	RCrow	Sanidine	18	IR962		129.138.12.160	7.875		C:18 Detrital San	ALLLLLAAAAAA	1	Pychron Script	1	Fusions CO2	4	4	0	4	0	30	30	112			0
	97	4	2.67755	0.0057978	0.1423	1.44603	87.9996	98.442	18.893	0.0153194	1e-20								65081-97	RC15-SW-95	37	2016-07-21	6.45	3551927000	RCrow	Sanidine	18	IR962		129.138.12.160	7.875		C:18 Detrital San	ALLLLLAAAAAA	1	Pychron Script	1	Fusions CO2	4	4	0	4	0	30	30	120			0
	139	4	2.83717	0.0069234	0.387	1.25586	73.6927	95.9769	19.5177	0.0161475	1e-20								65081-139	RC15-SW-95	37	2016-07-21	18	3551969000	RCrow	Sanidine	18	IR962		129.138.12.160	7.875		C:18 Detrital San	ALLLLLAAAAAA	1	Pychron Script	1	Fusions CO2	4	4	0	4	0	30	30	162			0
	50	4	2.85551	0.0110692	0.3951	1.49826	46.0922	95.9297	19.634	0.0137553	1e-20								65081-50	RC15-SW-95	37	2016-07-20	8.41667	3551848000	RCrow	Sanidine	18	IR962		129.138.12.160	7.875		C:18 Detrital San	ALLLLLAAAAAA	1	Pychron Script	1	Fusions CO2	4	4	0	4	0	30	30	72			0
	84	4	3.10652	0.0199329	0.8281	0.189152	25.5961	92.1535	20.5186	0.088086	1e-20								65081-84	RC15-SW-95	37	2016-07-20	17.45	3551880000	RCrow	Sanidine	18	IR962		129.138.12.160	7.875		C:18 Detrital San	ALLLLLAAAAAA	1	Pychron Script	1	Fusions CO2	4	4	0	4	0	30	30	106			0
	16	4	3.00957	0.0326007	0.4108	1.69384	15.6501	96.0398	20.714	0.0153877	1e-20								65081-16	RC15-SW-95	37	2016-07-19	23.6167	3551816000	RCrow	Sanidine	18	IR962		129.138.12.160	7.875		C:18 Detrital San	ALLLLLAAAAAA	1	Pychron Script	1	Fusions CO2	4	4	0	4	0	30	30	38			0
	61	4	2.99717	0.0165684	0.3065	0.593768	30.7938	97.0129	20.8366	0.028708	1e-20								65081-61	RC15-SW-95	37	2016-07-20	11.4667	3551859000	RCrow	Sanidine	18	IR962		129.138.12.160	7.875		C:18 Detrital San	ALLLLLAAAAAA	1	Pychron Script	1	Fusions CO2	4	4	0	4	0	30	30	83			0
	119	4	3.89535	0.0421474	2.1109	0.412479	12.1052	84.0393	23.4565	0.0558024	1e-20								65081-119	RC15-SW-95	37	2016-07-21	12.8	3551950000	RCrow	Sanidine	18	IR962		129.138.12.160	7.875		C:18 Detrital San	ALLLLLAAAAAA	1	Pychron Script	1	Fusions CO2	4	4	0	4	0	30	30	142			0
	52	4	3.51966	0.0299718	0.7512	0.23224	17.0228	93.7466	23.6361	0.0996202	1e-20								65081-52	RC15-SW-95	37	2016-07-20	8.95	3551850000	RCrow	Sanidine	18	IR962		129.138.12.160	7.875		C:18 Detrital San	ALLLLLAAAAAA	1	Pychron Script	1	Fusions CO2	4	4	0	4	0	30	30	74			0
	109	4	3.47317	0.0087067	0.4802	0.552794	58.599	95.9253	23.8634	0.0332449	1e-20								65081-109	RC15-SW-95	37	2016-07-21	9.71667	3551939000	RCrow	Sanidine	18	IR962		129.138.12.160	7.875		C:18 Detrital San	ALLLLLAAAAAA	1	Pychron Script	1	Fusions CO2	4	4	0	4	0	30	30	132			0
	25	4	3.45609	0.005777	0.3074	1.03613	88.3164	97.3785	24.1039	0.0188421	1e-20								65081-25	RC15-SW-95	37	2016-07-20	2.43333	3551826000	RCrow	Sanidine	18	IR962		129.138.12.160	7.875		C:18 Detrital San	ALLLLLAAAAAA	1	Pychron Script	1	Fusions CO2	4	4	0	4	0	30	30	47			0
	09	4	3.62297	0.0067745	0.0865	2.17482	75.3124	99.3075	25.7592	0.0122555	1e-20								65081-09	RC15-SW-95	37	2016-07-19	22	3551810000	RCrow	Sanidine	18	IR962		129.138.12.160	7.875		C:18 Detrital San	ALLLLLAAAAAA	1	Pychron Script	1	Fusions CO2	4	4	0	4	0	30	30	31			0
	136	4	3.71402	0.0060756	0.2895	1.12249	83.9759	97.7048	25.9801	0.0217045	1e-20								65081-136	RC15-SW-95	37	2016-07-21	16.55	3551964000	RCrow	Sanidine	18	IR962		129.138.12.160	7.875		C:18 Detrital San	ALLLLLAAAAAA	1	Pychron Script	1	Fusions CO2	4	4	0	4	0	30	30	159			0
	82	4	3.73279	0.0073166	0.3433	1.54867	69.7324	97.2913	26.001	0.0149797	1e-20								65081-82	RC15-SW-95	37	2016-07-20	17.0167	3551879000	RCrow	Sanidine	18	IR962		129.138.12.160	7.875		C:18 Detrital San	ALLLLLAAAAAA	1	Pychron Script	1	Fusions CO2	4	4	0	4	0	30	30	104			0
	54	4	4.11407	0.0165532	1.1656	0.359453	30.8221	91.644	26.9915	0.0696603	1e-20								65081-54	RC15-SW-95	37	2016-07-20	9.38333	3551851000	RCrow	Sanidine	18	IR962		129.138.12.160	7.875		C:18 Detrital San	ALLLLLAAAAAA	1	Pychron Script	1	Fusions CO2	4	4	0	4	0	30	30	76			0
	41	4	4.03523	0.0119213	0.8464	0.42435	42.7977	93.8128	27.0989	0.0464597	1e-20								65081-41	RC15-SW-95	37	2016-07-20	6.68333	3551842000	RCrow	Sanidine	18	IR962		129.138.12.160	7.875		C:18 Detrital San	ALLLLLAAAAAA	1	Pychron Script	1	Fusions CO2	4	4	0	4	0	30	30	63			0
	70	4	3.93129	0.0129096	0.4092	0.947735	39.5213	96.9434	27.2792	0.0281942	1e-20								65081-70	RC15-SW-95	37	2016-07-20	13.65	3551867000	RCrow	Sanidine	18	IR962		129.138.12.160	7.875		C:18 Detrital San	ALLLLLAAAAAA	1	Pychron Script	1	Fusions CO2	4	4	0	4	0	30	30	92			0
	101	4	4.00305	0.0085676	0.6028	1.26076	59.5504	95.5579	27.3803	0.0187189	1e-20								65081-101	RC15-SW-95	37	2016-07-21	8.31667	3551934000	RCrow	Sanidine	18	IR962		129.138.12.160	7.875		C:18 Detrital San	ALLLLLAAAAAA	1	Pychron Script	1	Fusions CO2	4	4	0	4	0	30	30	124			0
	110	4	4.11581	0.0218902	0.8863	0.448989	23.3074	93.666	27.5942	0.055348	1e-20								65081-110	RC15-SW-95	37	2016-07-21	10.15	3551941000	RCrow	Sanidine	18	IR962		129.138.12.160	7.875		C:18 Detrital San	ALLLLLAAAAAA	1	Pychron Script	1	Fusions CO2	4	4	0	4	0	30	30	133			0
	68	4	3.96254	0.0273615	0.3531	1.08117	18.6468	97.4146	27.6277	0.0240524	1e-20								65081-68	RC15-SW-95	37	2016-07-20	13.2167	3551865000	RCrow	Sanidine	18	IR962		129.138.12.160	7.875		C:18 Detrital San	ALLLLLAAAAAA	1	Pychron Script	1	Fusions CO2	4	4	0	4	0	30	30	90			0
	24	4	3.97522	0.0137893	0.2637	0.996659	37	98.0627	27.8984	0.0195128	1e-20								65081-24	RC15-SW-95	37	2016-07-20	2.16667	3551825000	RCrow	Sanidine	18	IR962		129.138.12.160	7.875		C:18 Detrital San	ALLLLLAAAAAA	1	Pychron Script	1	Fusions CO2	4	4	0	4	0	30	30	46			0
	19	4	3.96947	0.0118817	0.1997	0.890428	42.9403	98.5332	27.9909	0.0219861	1e-20								65081-19	RC15-SW-95	37	2016-07-20	1.08333	3551822000	RCrow	Sanidine	18	IR962		129.138.12.160	7.875		C:18 Detrital San	ALLLLLAAAAAA	1	Pychron Script	1	Fusions CO2	4	4	0	4	0	30	30	41			0
	03	4	4.02641	0.0076226	0.2796	2.19017	66.9331	97.9582	28.2256	0.0139852	1e-20								65081-03	RC15-SW-95	37	2016-07-19	20.6833	3551806000	RCrow	Sanidine	18	IR962		129.138.12.160	7.875		C:18 Detrital San	ALLLLLAAAAAA	1	Pychron Script	1	Fusions CO2	4	4	0	4	0	30	30	25			0
	86	4	4.30082	0.029609	1.2072	0.850905	17.2314	91.7441	28.2403	0.0304576	1e-20								65081-86	RC15-SW-95	37	2016-07-20	17.8833	3551882000	RCrow	Sanidine	18	IR962		129.138.12.160	7.875		C:18 Detrital San	ALLLLLAAAAAA	1	Pychron Script	1	Fusions CO2	4	4	0	4	0	30	30	108			0
	43	4	4.05037	0.0048083	0.3498	1.44892	106.109	97.4519	28.2469	0.0157334	1e-20								65081-43	RC15-SW-95	37	2016-07-20	7.11667	3551843000	RCrow	Sanidine	18	IR962		129.138.12.160	7.875		C:18 Detrital San	ALLLLLAAAAAA	1	Pychron Script	1	Fusions CO2	4	4	0	4	0	30	30	65			0
	124	4	4.03468	0.014489	0.2111	1.185	35.2132	98.4784	28.4323	0.0213544	1e-20								65081-124	RC15-SW-95	37	2016-07-21	13.9833	3551954000	RCrow	Sanidine	18	IR962		129.138.12.160	7.875		C:18 Detrital San	ALLLLLAAAAAA	1	Pychron Script	1	Fusions CO2	4	4	0	4	0	30	30	147			0
	18	4	4.11056	0.0148555	0.4571	1.29734	34.3445	96.7356	28.4553	0.0213043	1e-20								65081-18	RC15-SW-95	37	2016-07-20	0.0666667	3551818000	RCrow	Sanidine	18	IR962		129.138.12.160	7.875		C:18 Detrital San	ALLLLLAAAAAA	1	Pychron Script	1	Fusions CO2	4	4	0	4	0	30	30	40			0
	115	4	4.23027	0.023028	0.7424	0.948526	22.1558	94.8465	28.7117	0.0291481	1e-20								65081-115	RC15-SW-95	37	2016-07-21	11.2333	3551944000	RCrow	Sanidine	18	IR962		129.138.12.160	7.875		C:18 Detrital San	ALLLLLAAAAAA	1	Pychron Script	1	Fusions CO2	4	4	0	4	0	30	30	138			0
	23	4	4.73038	0.0207503	2.3128	0.413736	24.5878	85.563	28.967	0.0583938	1e-20								65081-23	RC15-SW-95	37	2016-07-20	1.95	3551825000	RCrow	Sanidine	18	IR962		129.138.12.160	7.875		C:18 Detrital San	ALLLLLAAAAAA	1	Pychron Script	1	Fusions CO2	4	4	0	4	0	30	30	45			0
	134	4	4.12672	0.0134869	0.1193	0.845643	37.8296	99.1696	29.2795	0.02892	1e-20								65081-134	RC15-SW-95	37	2016-07-21	16.1167	3551962000	RCrow	Sanidine	18	IR962		129.138.12.160	7.875		C:18 Detrital San	ALLLLLAAAAAA	1	Pychron Script	1	Fusions CO2	4	4	0	4	0	30	30	157			0
	88	4	4.47072	0.0056293	1.0375	0.507084	90.6336	93.1401	29.7915	0.0515264	1e-20								65081-88	RC15-SW-95	37	2016-07-20	18.5333	3551884000	RCrow	Sanidine	18	IR962		129.138.12.160	7.875		C:18 Detrital San	ALLLLLAAAAAA	1	Pychron Script	1	Fusions CO2	4	4	0	4	0	30	30	110			0
	55	4	4.40847	0.0088276	0.7041	1.64388	57.7965	95.2877	30.0512	0.018874	1e-20								65081-55	RC15-SW-95	37	2016-07-20	9.6	3551852000	RCrow	Sanidine	18	IR962		129.138.12.160	7.875		C:18 Detrital San	ALLLLLAAAAAA	1	Pychron Script	1	Fusions CO2	4	4	0	4	0	30	30	77			0
	08	4	4.69968	0.0092514	1.6309	0.787376	55.1488	89.7444	30.1748	0.039623	1e-20								65081-08	RC15-SW-95	37	2016-07-19	21.7833	3551810000	RCrow	Sanidine	18	IR962		129.138.12.160	7.875		C:18 Detrital San	ALLLLLAAAAAA	1	Pychron Script	1	Fusions CO2	4	4	0	4	0	30	30	30			0
	17	4	4.42347	0.0050326	0.6354	1.31821	101.38	95.7566	30.2999	0.0225907	1e-20								65081-17	RC15-SW-95	37	2016-07-19	23.8333	3551817000	RCrow	Sanidine	18	IR962		129.138.12.160	7.875		C:18 Detrital San	ALLLLLAAAAAA	1	Pychron Script	1	Fusions CO2	4	4	0	4	0	30	30	39			0
	114	4	5.53674	0.0055677	4.315	0.35658	91.6364	76.9466	30.4845	0.0902299	1e-20								65081-114	RC15-SW-95	37	2016-07-21	11.0167	3551944000	RCrow	Sanidine	18	IR962		129.138.12.160	7.875		C:18 Detrital San	ALLLLLAAAAAA	1	Pychron Script	1	Fusions CO2	4	4	0	4	0	30	30	137			0
	76	4	5.35303	0.0114782	3.6659	0.279058	44.4498	79.7514	30.5456	0.106613	1e-20								65081-76	RC15-SW-95	37	2016-07-20	15.0333	3551872000	RCrow	Sanidine	18	IR962		129.138.12.160	7.875		C:18 Detrital San	ALLLLLAAAAAA	1	Pychron Script	1	Fusions CO2	4	4	0	4	0	30	30	98			0
	58	4	4.37608	0.0078654	0.339	0.530752	64.8669	97.7212	30.5874	0.0476618	1e-20								65081-58	RC15-SW-95	37	2016-07-20	10.1333	3551854000	RCrow	Sanidine	18	IR962		129.138.12.160	7.875		C:18 Detrital San	ALLLLLAAAAAA	1	Pychron Script	1	Fusions CO2	4	4	0	4	0	30	30	80			0
	47	4	4.53569	0.0136947	0.5471	0.946498	37.2556	96.4525	31.2874	0.02555	1e-20								65081-47	RC15-SW-95	37	2016-07-20	7.86667	3551846000	RCrow	Sanidine	18	IR962		129.138.12.160	7.875		C:18 Detrital San	ALLLLLAAAAAA	1	Pychron Script	1	Fusions CO2	4	4	0	4	0	30	30	69			0
	30	4	4.68012	0.0100416	0.6864	0.268252	50.809	95.6753	32.0187	0.0953628	1e-20								65081-30	RC15-SW-95	37	2016-07-20	3.51667	3551830000	RCrow	Sanidine	18	IR962		129.138.12.160	7.875		C:18 Detrital San	ALLLLLAAAAAA	1	Pychron Script	1	Fusions CO2	4	4	0	4	0	30	30	52			0
	93	4	6.17905	0.0031951	5.6894	0.0644012	159.683	72.7628	32.1609	0.402288	1e-20								65081-93	RC15-SW-95	37	2016-07-20	19.4833	3551888000	RCrow	Sanidine	18	IR962		129.138.12.160	7.875		C:18 Detrital San	ALLLLLAAAAAA	1	Pychron Script	1	Fusions CO2	4	4	0	4	0	30	30	115			0
	111	4	4.61132	0.008201	0.2699	1.38908	62.2124	98.2809	32.4029	0.0202846	1e-20								65081-111	RC15-SW-95	37	2016-07-21	10.3667	3551941000	RCrow	Sanidine	18	IR962		129.138.12.160	7.875		C:18 Detrital San	ALLLLLAAAAAA	1	Pychron Script	1	Fusions CO2	4	4	0	4	0	30	30	134			0
	87	4	4.6514	0.0209327	0.4089	1.10991	24.3735	97.4325	32.4032	0.0254041	1e-20								65081-87	RC15-SW-95	37	2016-07-20	18.3167	3551884000	RCrow	Sanidine	18	IR962		129.138.12.160	7.875		C:18 Detrital San	ALLLLLAAAAAA	1	Pychron Script	1	Fusions CO2	4	4	0	4	0	30	30	109			0
	126	4	4.64588	0.0142581	0.3788	0.133252	35.7834	97.6093	32.423	0.182764	1e-20								65081-126	RC15-SW-95	37	2016-07-21	14.4167	3551956000	RCrow	Sanidine	18	IR962		129.138.12.160	7.875		C:18 Detrital San	ALLLLLAAAAAA	1	Pychron Script	1	Fusions CO2	4	4	0	4	0	30	30	149			0
	33	4	4.60638	0.0183787	0.2389	0.599304	27.7606	98.4957	32.4388	0.0431586	1e-20								65081-33	RC15-SW-95	37	2016-07-20	4.03333	3551832000	RCrow	Sanidine	18	IR962		129.138.12.160	7.875		C:18 Detrital San	ALLLLLAAAAAA	1	Pychron Script	1	Fusions CO2	4	4	0	4	0	30	30	55			0
	02	4	4.73247	0.003775	0.6125	1.21061	135.153	96.1751	32.5418	0.0200468	1e-20								65081-02	RC15-SW-95	37	2016-07-19	20.25	3551804000	RCrow	Sanidine	18	IR962		129.138.12.160	7.875		C:18 Detrital San	ALLLLLAAAAAA	1	Pychron Script	1	Fusions CO2	4	4	0	4	0	30	30	24			0
	117	4	4.73025	0.0039069	0.5599	0.978971	130.59	96.5029	32.6365	0.0293145	1e-20								65081-117	RC15-SW-95	37	2016-07-21	11.55	3551946000	RCrow	Sanidine	18	IR962		129.138.12.160	7.875		C:18 Detrital San	ALLLLLAAAAAA	1	Pychron Script	1	Fusions CO2	4	4	0	4	0	30	30	140			0
	118	4	5.06661	0.0119269	1.5816	0.160127	42.7776	90.7805	32.8857	0.129641	1e-20								65081-118	RC15-SW-95	37	2016-07-21	12.5667	3551949000	RCrow	Sanidine	18	IR962		129.138.12.160	7.875		C:18 Detrital San	ALLLLLAAAAAA	1	Pychron Script	1	Fusions CO2	4	4	0	4	0	30	30	141			0
	138	4	4.70758	0.0056619	0.2631	0.96237	90.1118	98.3548	33.0989	0.0234149	1e-20								65081-138	RC15-SW-95	37	2016-07-21	17.7833	3551968000	RCrow	Sanidine	18	IR962		129.138.12.160	7.875		C:18 Detrital San	ALLLLLAAAAAA	1	Pychron Script	1	Fusions CO2	4	4	0	4	0	30	30	161			0
	72	4	4.65871	0.0053207	0.0924	1.55198	95.8904	99.4217	33.11	0.017898	1e-20								65081-72	RC15-SW-95	37	2016-07-20	14.1	3551868000	RCrow	Sanidine	18	IR962		129.138.12.160	7.875		C:18 Detrital San	ALLLLLAAAAAA	1	Pychron Script	1	Fusions CO2	4	4	0	4	0	30	30	94			0
	80	4	5.00958	0.0118101	1.1392	0.703178	43.2007	93.288	33.4084	0.0362523	1e-20								65081-80	RC15-SW-95	37	2016-07-20	16.5667	3551877000	RCrow	Sanidine	18	IR962		129.138.12.160	7.875		C:18 Detrital San	ALLLLLAAAAAA	1	Pychron Script	1	Fusions CO2	4	4	0	4	0	30	30	102			0
	42	4	4.85133	0.0077381	0.5892	0.874261	65.934	96.4176	33.4363	0.0270315	1e-20								65081-42	RC15-SW-95	37	2016-07-20	6.9	3551842000	RCrow	Sanidine	18	IR962		129.138.12.160	7.875		C:18 Detrital San	ALLLLLAAAAAA	1	Pychron Script	1	Fusions CO2	4	4	0	4	0	30	30	64			0
	12	4	4.91671	0.0216219	0.706	1.11365	23.5966	95.7843	33.6634	0.0280918	1e-20								65081-12	RC15-SW-95	37	2016-07-19	22.6667	3551813000	RCrow	Sanidine	18	IR962		129.138.12.160	7.875		C:18 Detrital San	ALLLLLAAAAAA	1	Pychron Script	1	Fusions CO2	4	4	0	4	0	30	30	34			0
	69	4	5.40709	0.013882	2.2621	0.348657	36.7529	87.6399	33.8755	0.0848251	1e-20								65081-69	RC15-SW-95	37	2016-07-20	13.4333	3551866000	RCrow	Sanidine	18	IR962		129.138.12.160	7.875		C:18 Detrital San	ALLLLLAAAAAA	1	Pychron Script	1	Fusions CO2	4	4	0	4	0	30	30	91			0
	15	4	4.86932	0.0097939	0.4405	1.30824	52.0941	97.338	33.8769	0.0227113	1e-20								65081-15	RC15-SW-95	37	2016-07-19	23.4	3551815000	RCrow	Sanidine	18	IR962		129.138.12.160	7.875		C:18 Detrital San	ALLLLLAAAAAA	1	Pychron Script	1	Fusions CO2	4	4	0	4	0	30	30	37			0
	29	4	5.23021	0.0112706	1.5747	0.308706	45.2686	91.1068	34.0602	0.0884114	1e-20								65081-29	RC15-SW-95	37	2016-07-20	3.3	3551830000	RCrow	Sanidine	18	IR962		129.138.12.160	7.875		C:18 Detrital San	ALLLLLAAAAAA	1	Pychron Script	1	Fusions CO2	4	4	0	4	0	30	30	51			0
	11	4	4.84788	0.0171406	0.2689	1.42142	29.7658	98.3854	34.0886	0.0206363	1e-20								65081-11	RC15-SW-95	37	2016-07-19	22.45	3551812000	RCrow	Sanidine	18	IR962		129.138.12.160	7.875		C:18 Detrital San	ALLLLLAAAAAA	1	Pychron Script	1	Fusions CO2	4	4	0	4	0	30	30	33			0
	04	4	4.8282	0.0071754	0.1365	0.651482	71.1046	99.1748	34.2209	0.0414671	1e-20								65081-04	RC15-SW-95	37	2016-07-19	20.9	3551806000	RCrow	Sanidine	18	IR962		129.138.12.160	7.875		C:18 Detrital San	ALLLLLAAAAAA	1	Pychron Script	1	Fusions CO2	4	4	0	4	0	30	30	26			0
	127	4	4.92219	0.0057072	0.3707	1.65338	89.3966	97.7795	34.3956	0.0179467	1e-20								65081-127	RC15-SW-95	37	2016-07-21	14.6333	3551957000	RCrow	Sanidine	18	IR962		129.138.12.160	7.875		C:18 Detrital San	ALLLLLAAAAAA	1	Pychron Script	1	Fusions CO2	4	4	0	4	0	30	30	150			0
	105	4	5.3164	0.015056	1.7059	0.0897988	33.8871	90.5277	34.3992	0.225494	1e-20								65081-105	RC15-SW-95	37	2016-07-21	8.96667	3551936000	RCrow	Sanidine	18	IR962		129.138.12.160	7.875		C:18 Detrital San	ALLLLLAAAAAA	1	Pychron Script	1	Fusions CO2	4	4	0	4	0	30	30	128			0
	95	4	5.06024	0.0058943	0.8298	0.37092	86.5589	95.1554	34.4126	0.0718561	1e-20								65081-95	RC15-SW-95	37	2016-07-20	19.9167	3551889000	RCrow	Sanidine	18	IR962		129.138.12.160	7.875		C:18 Detrital San	ALLLLLAAAAAA	1	Pychron Script	1	Fusions CO2	4	4	0	4	0	30	30	117			0
	46	4	5.96115	0.0187081	3.8743	0.100186	27.2718	80.7945	34.429	0.222032	1e-20								65081-46	RC15-SW-95	37	2016-07-20	7.65	3551845000	RCrow	Sanidine	18	IR962		129.138.12.160	7.875		C:18 Detrital San	ALLLLLAAAAAA	1	Pychron Script	1	Fusions CO2	4	4	0	4	0	30	30	68			0
	89	4	4.87446	0.0067978	0.1434	1.72214	75.0543	99.1397	34.5341	0.016868	1e-20								65081-89	RC15-SW-95	37	2016-07-20	18.75	3551885000	RCrow	Sanidine	18	IR962		129.138.12.160	7.875		C:18 Detrital San	ALLLLLAAAAAA	1	Pychron Script	1	Fusions CO2	4	4	0	4	0	30	30	111			0
	39	4	4.88629	0.012974	0.1604	0.976537	39.3251	99.0485	34.5859	0.0221218	1e-20								65081-39	RC15-SW-95	37	2016-07-20	6.36667	3551841000	RCrow	Sanidine	18	IR962		129.138.12.160	7.875		C:18 Detrital San	ALLLLLAAAAAA	1	Pychron Script	1	Fusions CO2	4	4	0	4	0	30	30	61			0
	99	4	4.90813	0.0059602	0.1803	1.34146	85.6018	98.9223	34.6952	0.0174308	1e-20								65081-99	RC15-SW-95	37	2016-07-21	7.88333	3551932000	RCrow	Sanidine	18	IR962		129.138.12.160	7.875		C:18 Detrital San	ALLLLLAAAAAA	1	Pychron Script	1	Fusions CO2	4	4	0	4	0	30	30	122			0
	07	4	4.90968	0.006334	0.1325	2.26032	80.55	99.2109	34.8064	0.013868	1e-20								65081-07	RC15-SW-95	37	2016-07-19	21.5667	3551809000	RCrow	Sanidine	18	IR962		129.138.12.160	7.875		C:18 Detrital San	ALLLLLAAAAAA	1	Pychron Script	1	Fusions CO2	4	4	0	4	0	30	30	29			0
	64	4	4.98928	0.0073757	0.3879	2.08626	69.1736	97.7106	34.8364	0.0158373	1e-20								65081-64	RC15-SW-95	37	2016-07-20	12.3333	3551862000	RCrow	Sanidine	18	IR962		129.138.12.160	7.875		C:18 Detrital San	ALLLLLAAAAAA	1	Pychron Script	1	Fusions CO2	4	4	0	4	0	30	30	86			0
	06	4	5.01709	0.0177194	0.4844	1.44242	28.7935	97.1697	34.8372	0.0221241	1e-20								65081-06	RC15-SW-95	37	2016-07-19	21.35	3551808000	RCrow	Sanidine	18	IR962		129.138.12.160	7.875		C:18 Detrital San	ALLLLLAAAAAA	1	Pychron Script	1	Fusions CO2	4	4	0	4	0	30	30	28			0
	05	4	4.97933	0.005712	0.3513	1.47313	89.3214	97.9205	34.8414	0.0213562	1e-20								65081-05	RC15-SW-95	37	2016-07-19	21.1333	3551807000	RCrow	Sanidine	18	IR962		129.138.12.160	7.875		C:18 Detrital San	ALLLLLAAAAAA	1	Pychron Script	1	Fusions CO2	4	4	0	4	0	30	30	27			0
	65	4	4.9815	0.0057676	0.3519	1.17585	88.4604	97.9179	34.8556	0.0249005	1e-20								65081-65	RC15-SW-95	37	2016-07-20	12.5667	3551863000	RCrow	Sanidine	18	IR962		129.138.12.160	7.875		C:18 Detrital San	ALLLLLAAAAAA	1	Pychron Script	1	Fusions CO2	4	4	0	4	0	30	30	87			0
	20	4	5.01433	0.0079211	0.4439	0.482638	64.4108	97.392	34.8968	0.0441293	1e-20								65081-20	RC15-SW-95	37	2016-07-20	1.3	3551822000	RCrow	Sanidine	18	IR962		129.138.12.160	7.875		C:18 Detrital San	ALLLLLAAAAAA	1	Pychron Script	1	Fusions CO2	4	4	0	4	0	30	30	42			0
	102	4	5.13843	0.015045	0.8635	0.892893	33.9119	95.0491	34.9017	0.028576	1e-20								65081-102	RC15-SW-95	37	2016-07-21	8.53333	3551935000	RCrow	Sanidine	18	IR962		129.138.12.160	7.875		C:18 Detrital San	ALLLLLAAAAAA	1	Pychron Script	1	Fusions CO2	4	4	0	4	0	30	30	125			0
	38	4	5.07502	0.0067407	0.6369	1.28739	75.6901	96.2962	34.9222	0.0241238	1e-20								65081-38	RC15-SW-95	37	2016-07-20	5.13333	3551836000	RCrow	Sanidine	18	IR962		129.138.12.160	7.875		C:18 Detrital San	ALLLLLAAAAAA	1	Pychron Script	1	Fusions CO2	4	4	0	4	0	30	30	60			0
	74	4	4.98823	0.0036052	0.3418	2.94123	141.519	97.9773	34.9232	0.0126351	1e-20								65081-74	RC15-SW-95	37	2016-07-20	14.3833	3551869000	RCrow	Sanidine	18	IR962		129.138.12.160	7.875		C:18 Detrital San	ALLLLLAAAAAA	1	Pychron Script	1	Fusions CO2	4	4	0	4	0	30	30	96			0
	132	4	4.92143	0.008527	0.1143	0.604271	59.8339	99.3255	34.929	0.042596	1e-20								65081-132	RC15-SW-95	37	2016-07-21	15.4667	3551960000	RCrow	Sanidine	18	IR962		129.138.12.160	7.875		C:18 Detrital San	ALLLLLAAAAAA	1	Pychron Script	1	Fusions CO2	4	4	0	4	0	30	30	155			0
	60	4	4.99302	0.0065714	0.3366	1.35838	77.6401	98.0148	34.9698	0.0180121	1e-20								65081-60	RC15-SW-95	37	2016-07-20	11.25	3551858000	RCrow	Sanidine	18	IR962		129.138.12.160	7.875		C:18 Detrital San	ALLLLLAAAAAA	1	Pychron Script	1	Fusions CO2	4	4	0	4	0	30	30	82			0
	133	4	5.05029	0.0044134	0.3743	1.18975	115.603	97.813	35.2955	0.024117	1e-20								65081-133	RC15-SW-95	37	2016-07-21	15.6833	3551960000	RCrow	Sanidine	18	IR962		129.138.12.160	7.875		C:18 Detrital San	ALLLLLAAAAAA	1	Pychron Script	1	Fusions CO2	4	4	0	4	0	30	30	156			0
	137	4	5.0124	0.0056381	0.2321	0.599294	90.4922	98.6382	35.3256	0.0442556	1e-20								65081-137	RC15-SW-95	37	2016-07-21	16.7667	3551964000	RCrow	Sanidine	18	IR962		129.138.12.160	7.875		C:18 Detrital San	ALLLLLAAAAAA	1	Pychron Script	1	Fusions CO2	4	4	0	4	0	30	30	160			0
	14	4	5.05094	0.0072558	0.3145	1.91124	70.3167	98.1681	35.427	0.0167042	1e-20								65081-14	RC15-SW-95	37	2016-07-19	22.9667	3551814000	RCrow	Sanidine	18	IR962		129.138.12.160	7.875		C:18 Detrital San	ALLLLLAAAAAA	1	Pychron Script	1	Fusions CO2	4	4	0	4	0	30	30	36			0
	75	4	4.98346	0.0046168	0.0711	1.62233	110.51	99.5846	35.457	0.0181338	1e-20								65081-75	RC15-SW-95	37	2016-07-20	14.8167	3551871000	RCrow	Sanidine	18	IR962		129.138.12.160	7.875		C:18 Detrital San	ALLLLLAAAAAA	1	Pychron Script	1	Fusions CO2	4	4	0	4	0	30	30	97			0
	31	4	5.46961	0.0112784	1.6799	0.21989	45.2373	90.9276	35.5371	0.127252	1e-20								65081-31	RC15-SW-95	37	2016-07-20	3.75	3551831000	RCrow	Sanidine	18	IR962		129.138.12.160	7.875		C:18 Detrital San	ALLLLLAAAAAA	1	Pychron Script	1	Fusions CO2	4	4	0	4	0	30	30	53			0
	49	4	5.16156	0.0350896	0.4714	1.01969	14.54	97.3493	35.8982	0.023612	1e-20								65081-49	RC15-SW-95	37	2016-07-20	8.2	3551847000	RCrow	Sanidine	18	IR962		129.138.12.160	7.875		C:18 Detrital San	ALLLLLAAAAAA	1	Pychron Script	1	Fusions CO2	4	4	0	4	0	30	30	71			0
	79	4	5.22455	0.0213707	0.3257	1.06571	23.874	98.1865	36.6416	0.0225511	1e-20								65081-79	RC15-SW-95	37	2016-07-20	16.35	3551876000	RCrow	Sanidine	18	IR962		129.138.12.160	7.875		C:18 Detrital San	ALLLLLAAAAAA	1	Pychron Script	1	Fusions CO2	4	4	0	4	0	30	30	101			0
	83	4	5.45967	0.0050413	0.067	2.54724	101.205	99.6435	38.8373	0.0112873	1e-20								65081-83	RC15-SW-95	37	2016-07-20	17.2333	3551880000	RCrow	Sanidine	18	IR962		129.138.12.160	7.875		C:18 Detrital San	ALLLLLAAAAAA	1	Pychron Script	1	Fusions CO2	4	4	0	4	0	30	30	105			0
	131	4	5.47424	0.0031291	0.0862	1.32341	163.051	99.5382	38.8992	0.0224133	1e-20								65081-131	RC15-SW-95	37	2016-07-21	15.25	3551959000	RCrow	Sanidine	18	IR962		129.138.12.160	7.875		C:18 Detrital San	ALLLLLAAAAAA	1	Pychron Script	1	Fusions CO2	4	4	0	4	0	30	30	154			0
	129	4	5.50862	0.0170646	0.1841	1.45052	29.8984	99.0349	38.9458	0.0206569	1e-20								65081-129	RC15-SW-95	37	2016-07-21	14.9333	3551958000	RCrow	Sanidine	18	IR962		129.138.12.160	7.875		C:18 Detrital San	ALLLLLAAAAAA	1	Pychron Script	1	Fusions CO2	4	4	0	4	0	30	30	152			0
	67	4	5.70879	0.0072904	0.0953	0.860591	69.983	99.5159	40.541	0.0343542	1e-20								65081-67	RC15-SW-95	37	2016-07-20	13	3551864000	RCrow	Sanidine	18	IR962		129.138.12.160	7.875		C:18 Detrital San	ALLLLLAAAAAA	1	Pychron Script	1	Fusions CO2	4	4	0	4	0	30	30	89			0
	26	4	6.00108	0.0061282	0.267	1.39858	83.2551	98.6913	42.2465	0.0186999	1e-20								65081-26	RC15-SW-95	37	2016-07-20	2.65	3551827000	RCrow	Sanidine	18	IR962		129.138.12.160	7.875		C:18 Detrital San	ALLLLLAAAAAA	1	Pychron Script	1	Fusions CO2	4	4	0	4	0	30	30	48			0
	135	4	5.97009	0.0065548	0.1416	1.26709	77.8367	99.3068	42.2897	0.024647	1e-20								65081-135	RC15-SW-95	37	2016-07-21	16.3333	3551963000	RCrow	Sanidine	18	IR962		129.138.12.160	7.875		C:18 Detrital San	ALLLLLAAAAAA	1	Pychron Script	1	Fusions CO2	4	4	0	4	0	30	30	158			0
	01	4	6.01268	0.0052725	0.183	1.33644	96.767	99.106	42.503	0.0194765	1e-20								65081-01	RC15-SW-95	37	2016-07-19	20.0333	3551803000	RCrow	Sanidine	18	IR962		129.138.12.160	7.875		C:18 Detrital San	ALLLLLAAAAAA	1	Pychron Script	1	Fusions CO2	4	4	0	4	0	30	30	23			0
	106	4	6.02649	0.0054348	0.084	1.58845	93.8772	99.5945	42.8073	0.0164492	1e-20								65081-106	RC15-SW-95	37	2016-07-21	9.18333	3551937000	RCrow	Sanidine	18	IR962		129.138.12.160	7.875		C:18 Detrital San	ALLLLLAAAAAA	1	Pychron Script	1	Fusions CO2	4	4	0	4	0	30	30	129			0
	21	4	6.27508	0.0049683	0.5549	0.334355	102.692	97.3898	43.5792	0.071589	1e-20								65081-21	RC15-SW-95	37	2016-07-20	1.51667	3551823000	RCrow	Sanidine	18	IR962		129.138.12.160	7.875		C:18 Detrital San	ALLLLLAAAAAA	1	Pychron Script	1	Fusions CO2	4	4	0	4	0	30	30	43			0
	63	4	6.26036	0.0030673	0.4965	0.695074	166.337	97.6573	43.596	0.0457134	1e-20								65081-63	RC15-SW-95	37	2016-07-20	12.1167	3551861000	RCrow	Sanidine	18	IR962		129.138.12.160	7.875		C:18 Detrital San	ALLLLLAAAAAA	1	Pychron Script	1	Fusions CO2	4	4	0	4	0	30	30	85			0
	53	4	6.37638	0.0129602	0.0749	0.696202	39.367	99.668	45.2984	0.0446914	1e-20								65081-53	RC15-SW-95	37	2016-07-20	9.16667	3551851000	RCrow	Sanidine	18	IR962		129.138.12.160	7.875		C:18 Detrital San	ALLLLLAAAAAA	1	Pychron Script	1	Fusions CO2	4	4	0	4	0	30	30	75			0
	112	4	6.61496	0.0039963	0.4923	0.253983	127.669	97.8033	46.1055	0.120664	1e-20								65081-112	RC15-SW-95	37	2016-07-21	10.5833	3551942000	RCrow	Sanidine	18	IR962		129.138.12.160	7.875		C:18 Detrital San	ALLLLLAAAAAA	1	Pychron Script	1	Fusions CO2	4	4	0	4	0	30	30	135			0
	37	4	6.49328	0.0419563	0.0514	0.604343	12.1604	99.8157	46.1879	0.0514279	1e-20								65081-37	RC15-SW-95	37	2016-07-20	4.91667	3551835000	RCrow	Sanidine	18	IR962		129.138.12.160	7.875		C:18 Detrital San	ALLLLLAAAAAA	1	Pychron Script	1	Fusions CO2	4	4	0	4	0	30	30	59			0
	62	4	6.78198	0.0065279	0.8122	1.09122	78.1574	96.4646	46.6175	0.02794	1e-20								65081-62	RC15-SW-95	37	2016-07-20	11.6833	3551860000	RCrow	Sanidine	18	IR962		129.138.12.160	7.875		C:18 Detrital San	ALLLLLAAAAAA	1	Pychron Script	1	Fusions CO2	4	4	0	4	0	30	30	84			0
	123	4	6.69359	0.0095237	0.0533	1.16078	53.572	99.7754	47.5759	0.0285347	1e-20								65081-123	RC15-SW-95	37	2016-07-21	13.7667	3551954000	RCrow	Sanidine	18	IR962		129.138.12.160	7.875		C:18 Detrital San	ALLLLLAAAAAA	1	Pychron Script	1	Fusions CO2	4	4	0	4	0	30	30	146			0
	34	4	6.72304	0.008654	0.1377	0.824763	58.9559	99.4037	47.607	0.0392746	1e-20								65081-34	RC15-SW-95	37	2016-07-20	4.26667	3551833000	RCrow	Sanidine	18	IR962		129.138.12.160	7.875		C:18 Detrital San	ALLLLLAAAAAA	1	Pychron Script	1	Fusions CO2	4	4	0	4	0	30	30	56			0
	10	4	6.73923	0.0047214	0.1009	1.10561	108.062	99.5625	47.7954	0.0306802	1e-20								65081-10	RC15-SW-95	37	2016-07-19	22.2333	3551811000	RCrow	Sanidine	18	IR962		129.138.12.160	7.875		C:18 Detrital San	ALLLLLAAAAAA	1	Pychron Script	1	Fusions CO2	4	4	0	4	0	30	30	32			0
	122	4	6.9318	0.0109692	0.0993	0.524305	46.5124	99.5883	49.1573	0.0592866	1e-20								65081-122	RC15-SW-95	37	2016-07-21	13.5333	3551953000	RCrow	Sanidine	18	IR962		129.138.12.160	7.875		C:18 Detrital San	ALLLLLAAAAAA	1	Pychron Script	1	Fusions CO2	4	4	0	4	0	30	30	145			0
	108	4	9.75293	0.0110861	9.207	0.0744111	46.022	72.0918	50.0706	0.376304	1e-20								65081-108	RC15-SW-95	37	2016-07-21	9.5	3551938000	RCrow	Sanidine	18	IR962		129.138.12.160	7.875		C:18 Detrital San	ALLLLLAAAAAA	1	Pychron Script	1	Fusions CO2	4	4	0	4	0	30	30	131			0
	56	4	7.36322	0.0065786	0.8243	0.445322	77.5551	96.6953	50.6817	0.0750379	1e-20								65081-56	RC15-SW-95	37	2016-07-20	9.81667	3551853000	RCrow	Sanidine	18	IR962		129.138.12.160	7.875		C:18 Detrital San	ALLLLLAAAAAA	1	Pychron Script	1	Fusions CO2	4	4	0	4	0	30	30	78			0
	35	4	8.1767	0.0081704	0.3141	2.40064	62.4454	98.8715	57.4468	0.0182937	1e-20								65081-35	RC15-SW-95	37	2016-07-20	4.48333	3551834000	RCrow	Sanidine	18	IR962		129.138.12.160	7.875		C:18 Detrital San	ALLLLLAAAAAA	1	Pychron Script	1	Fusions CO2	4	4	0	4	0	30	30	57			0
	81	4	8.64416	0.0029913	0.4471	2.11119	170.563	98.4728	60.4392	0.0197365	1e-20								65081-81	RC15-SW-95	37	2016-07-20	16.8	3551878000	RCrow	Sanidine	18	IR962		129.138.12.160	7.875		C:18 Detrital San	ALLLLLAAAAAA	1	Pychron Script	1	Fusions CO2	4	4	0	4	0	30	30	103			0
	22	4	10.7653	0.0050423	1.1448	1.16871	101.185	96.8588	73.7784	0.0376018	1e-20								65081-22	RC15-SW-95	37	2016-07-20	1.73333	3551824000	RCrow	Sanidine	18	IR962		129.138.12.160	7.875		C:18 Detrital San	ALLLLLAAAAAA	1	Pychron Script	1	Fusions CO2	4	4	0	4	0	30	30	44			0
	78	4	10.7755	0.0058554	0.0648	0.89682	87.1339	99.8261	76.063	0.0541599	1e-20								65081-78	RC15-SW-95	37	2016-07-20	15.3333	3551873000	RCrow	Sanidine	18	IR962		129.138.12.160	7.875		C:18 Detrital San	ALLLLLAAAAAA	1	Pychron Script	1	Fusions CO2	4	4	0	4	0	30	30	100			0
	66	4	10.804	0.0061592	0.0365	1.97606	82.8361	99.9043	76.3183	0.0276899	1e-20								65081-66	RC15-SW-95	37	2016-07-20	12.7833	3551864000	RCrow	Sanidine	18	IR962		129.138.12.160	7.875		C:18 Detrital San	ALLLLLAAAAAA	1	Pychron Script	1	Fusions CO2	4	4	0	4	0	30	30	88			0
	91	4	10.97	0.0034259	0.0958	0.522786	148.926	99.7442	77.3454	0.0874863	1e-20								65081-91	RC15-SW-95	37	2016-07-20	19.2	3551887000	RCrow	Sanidine	18	IR962		129.138.12.160	7.875		C:18 Detrital San	ALLLLLAAAAAA	1	Pychron Script	1	Fusions CO2	4	4	0	4	0	30	30	113			0
	85	4	11.059	0.0073727	0.258	1.31443	69.2018	99.3153	77.6328	0.032631	1e-20								65081-85	RC15-SW-95	37	2016-07-20	17.6667	3551881000	RCrow	Sanidine	18	IR962		129.138.12.160	7.875		C:18 Detrital San	ALLLLLAAAAAA	1	Pychron Script	1	Fusions CO2	4	4	0	4	0	30	30	107			0
	96	4	12.2785	0.0068474	2.2624	0.200176	74.5106	94.5562	81.9704	0.236242	1e-20								65081-96	RC15-SW-95	37	2016-07-20	20.1333	3551890000	RCrow	Sanidine	18	IR962		129.138.12.160	7.875		C:18 Detrital San	ALLLLLAAAAAA	1	Pychron Script	1	Fusions CO2	4	4	0	4	0	30	30	118			0
	44	4	11.7317	0.0027912	0.3572	1.48856	182.79	99.1014	82.0799	0.0303884	1e-20								65081-44	RC15-SW-95	37	2016-07-20	7.33333	3551844000	RCrow	Sanidine	18	IR962		129.138.12.160	7.875		C:18 Detrital San	ALLLLLAAAAAA	1	Pychron Script	1	Fusions CO2	4	4	0	4	0	30	30	66			0
	113	4	13.7097	0.0088046	0.0533	0.807652	57.9474	99.8899	96.3131	0.0702363	1e-20								65081-113	RC15-SW-95	37	2016-07-21	10.8	3551943000	RCrow	Sanidine	18	IR962		129.138.12.160	7.875		C:18 Detrital San	ALLLLLAAAAAA	1	Pychron Script	1	Fusions CO2	4	4	0	4	0	30	30	136			0
	94	4	14.0097	0.0121783	0.8293	0.12229	41.8945	98.2566	96.7995	0.437067	1e-20								65081-94	RC15-SW-95	37	2016-07-20	19.7	3551889000	RCrow	Sanidine	18	IR962		129.138.12.160	7.875		C:18 Detrital San	ALLLLLAAAAAA	1	Pychron Script	1	Fusions CO2	4	4	0	4	0	30	30	116			0
	57	4	26.63	0.0064585	0.6476	1.40147	78.9973	99.283	181.654	0.212318	1e-20								65081-57	RC15-SW-95	37	2016-07-20	9.91667	3551853000	RCrow	Sanidine	18	IR962		129.138.12.160	7.875		C:18 Detrital San	ALLLLLAAAAAA	1	Pychron Script	1	Fusions CO2	4	4	0	4	0	30	30	79			0
	45	4	27.0515	0.0122968	0.1152	2.303	41.4908	99.8777	185.441	0.153699	1e-20								65081-45	RC15-SW-95	37	2016-07-20	7.43333	3551844000	RCrow	Sanidine	18	IR962		129.138.12.160	7.875		C:18 Detrital San	ALLLLLAAAAAA	1	Pychron Script	1	Fusions CO2	4	4	0	4	0	30	30	67			0
	107	4	32.5622	0.0058386	0.2361	1.16787	87.3846	99.7871	220.839	0.251014	1e-20								65081-107	RC15-SW-95	37	2016-07-21	9.28333	3551937000	RCrow	Sanidine	18	IR962		129.138.12.160	7.875		C:18 Detrital San	ALLLLLAAAAAA	1	Pychron Script	1	Fusions CO2	4	4	0	4	0	30	30	130			0
	120	4	37.8711	0.0014968	2.0688	1.93226	340.863	98.3857	251.114	0.235529	1e-20								65081-120	RC15-SW-95	37	2016-07-21	12.9	3551950000	RCrow	Sanidine	18	IR962		129.138.12.160	7.875		C:18 Detrital San	ALLLLLAAAAAA	1	Pychron Script	1	Fusions CO2	4	4	0	4	0	30	30	143			0
	130	4	48.357	-0.0083218	0.7272	0.278201	-	99.5543	318.403	1.74205	1e-20								65081-130	RC15-SW-95	37	2016-07-21	15.0167	3551958000	RCrow	Sanidine	18	IR962		129.138.12.160	7.875		C:18 Detrital San	ALLLLLAAAAAA	1	Pychron Script	1	Fusions CO2	4	4	0	4	0	30	30	153			0
	40	4	66.7175	0.0949663	27.5669	0.0113106	5.37247	87.8005	380.728	33.3655	1e-20								65081-40	RC15-SW-95	37	2016-07-20	6.46667	3551841000	RCrow	Sanidine	18	IR962		129.138.12.160	7.875		C:18 Detrital San	ALLLLLAAAAAA	1	Pychron Script	1	Fusions CO2	4	4	0	4	0	30	30	62			0
	116	4	144.133	0.0011857	1.0068	1.54302	430.298	99.7936	823.012	0.667843	1e-20								65081-116	RC15-SW-95	37	2016-07-21	11.3333	3551945000	RCrow	Sanidine	18	IR962		129.138.12.160	7.875		C:18 Detrital San	ALLLLLAAAAAA	1	Pychron Script	1	Fusions CO2	4	4	0	4	0	30	30	139			0
	103	4	161.661	-0.0001845	0.7073	0.963216	-	99.8707	902.456	1.00568	1e-20								65081-103	RC15-SW-95	37	2016-07-21	8.65	3551935000	RCrow	Sanidine	18	IR962		129.138.12.160	7.875		C:18 Detrital San	ALLLLLAAAAAA	1	Pychron Script	1	Fusions CO2	4	4	0	4	0	30	30	126			0
	59	4	241.64	0.0042266	1.1481	0.297217	120.713	99.8598	1224.72	3.69732	1e-20								65081-59	RC15-SW-95	37	2016-07-20	11.0333	3551857000	RCrow	Sanidine	18	IR962		129.138.12.160	7.875		C:18 Detrital San	ALLLLLAAAAAA	1	Pychron Script	1	Fusions CO2	4	4	0	4	0	30	30	81			0
	27	4	241.598	0.0077845	0.2313	0.779019	65.541	99.972	1225.57	1.30591	1e-20								65081-27	RC15-SW-95	37	2016-07-20	2.96667	3551828000	RCrow	Sanidine	18	IR962		129.138.12.160	7.875		C:18 Detrital San	ALLLLLAAAAAA	1	Pychron Script	1	Fusions CO2	4	4	0	4	0	30	30	49			0
	104	4	256.143	0.0037984	0.6439	0.598383	134.321	99.9258	1278.16	2.65214	1e-20								65081-104	RC15-SW-95	37	2016-07-21	8.73333	3551935000	RCrow	Sanidine	18	IR962		129.138.12.160	7.875		C:18 Detrital San	ALLLLLAAAAAA	1	Pychron Script	1	Fusions CO2	4	4	0	4	0	30	30	127			0
	48	4	268.802	0.0053598	0.3343	0.904446	95.1909	99.9634	1323.42	1.43183	1e-20								65081-48	RC15-SW-95	37	2016-07-20	7.96667	3551846000	RCrow	Sanidine	18	IR962		129.138.12.160	7.875		C:18 Detrital San	ALLLLLAAAAAA	1	Pychron Script	1	Fusions CO2	4	4	0	4	0	30	30	70			0
	51	4	278.835	0.0054334	0.4618	0.613945	93.9014	99.9512	1358.14	2.13588	1e-20								65081-51	RC15-SW-95	37	2016-07-20	8.73333	3551849000	RCrow	Sanidine	18	IR962		129.138.12.160	7.875		C:18 Detrital San	ALLLLLAAAAAA	1	Pychron Script	1	Fusions CO2	4	4	0	4	0	30	30	73			0
				n=132
	K17-BS-1, Sanidine, J=0.0027758±0.02%, IC=0.9989985±0.0017491, NM-290N, Lab#=65735, Argus VI
	42	5	2.13437	0.0063415	0.0433	9.65242	80.4548	99.4219	10.7065	0.0045364	0.0017491								65735-42	K17-BS-1	37	2017-07-07	22.45	3582311000	Heizler, M	Sanidine	9	IR1009		129.138.12.160	7.875	Ar40 = P @ 8/7/17 9:41 AM; Ar39 = P @ 8/7/17 9:41 AM; Ar38 = L @ 8/7/17 9:41 AM; Ar37 = L @ 8/7/17 9:41 AM; Ar36 = P @ 8/7/17 9:41 AM; Ar41 bk val,er = @ 8/7/17 2:49 PM; Average background @ 8/7/17 2:49 PM; Ar40 bk val,er = @ 8/7/17 2:49 PM; Average background @ 8/7/17 2:49 PM; Ar39 bk val,er = @ 8/7/17 2:49 PM; Average background @ 8/7/17 2:49 PM; Ar38 bk val,er = @ 8/7/17 2:49 PM; Average backg…	N:9	LPPLLPAAAAAA	1	Pychron Script	1	Fusions CO2	5	0	0	0	0	30	30	124			0
	58	5	2.4041	0.0063805	0.782	5.73898	79.963	90.374	10.9663	0.010237	0.0017491								65735-58	K17-BS-1	37	2017-07-08	2.48333	3582326000	Heizler, M	Sanidine	9	IR1009		129.138.12.160	7.875	Ar40 = P @ 8/7/17 9:41 AM; Ar39 = P @ 8/7/17 9:41 AM; Ar38 = L @ 8/7/17 9:41 AM; Ar37 = L @ 8/7/17 9:41 AM; Ar36 = P @ 8/7/17 9:41 AM; Ar41 bk val,er = @ 8/7/17 2:49 PM; Average background @ 8/7/17 2:49 PM; Ar40 bk val,er = @ 8/7/17 2:49 PM; Average background @ 8/7/17 2:49 PM; Ar39 bk val,er = @ 8/7/17 2:49 PM; Average background @ 8/7/17 2:49 PM; Ar38 bk val,er = @ 8/7/17 2:49 PM; Average backg…	N:9	LPPLLPAAAAAA	1	Pychron Script	1	Fusions CO2	5	0	0	0	0	30	30	140			0
	43	5	4.79818	0.0233469	0.6228	3.13795	21.8532	96.1971	23.2618	0.015656	0.0017491								65735-43	K17-BS-1	37	2017-07-07	22.6667	3582312000	Heizler, M	Sanidine	9	IR1009		129.138.12.160	7.875	Ar40 = P @ 8/7/17 9:41 AM; Ar39 = P @ 8/7/17 9:41 AM; Ar38 = L @ 8/7/17 9:41 AM; Ar37 = L @ 8/7/17 9:41 AM; Ar36 = P @ 8/7/17 9:41 AM; Ar41 bk val,er = @ 8/7/17 2:49 PM; Average background @ 8/7/17 2:49 PM; Ar40 bk val,er = @ 8/7/17 2:49 PM; Average background @ 8/7/17 2:49 PM; Ar39 bk val,er = @ 8/7/17 2:49 PM; Average background @ 8/7/17 2:49 PM; Ar38 bk val,er = @ 8/7/17 2:49 PM; Average backg…	N:9	LPPLLPAAAAAA	1	Pychron Script	1	Fusions CO2	5	0	0	0	0	30	30	125			0
	64	5	4.91702	0.0252581	1.0217	4.08489	20.1996	93.8902	23.2673	0.0140881	0.0017491								65735-64	K17-BS-1	37	2017-07-08	4.43333	3582333000	Heizler, M	Sanidine	9	IR1009		129.138.12.160	7.875	Ar40 = P @ 8/7/17 9:41 AM; Ar39 = P @ 8/7/17 9:41 AM; Ar38 = L @ 8/7/17 9:41 AM; Ar37 = L @ 8/7/17 9:41 AM; Ar36 = P @ 8/7/17 9:41 AM; Ar41 bk val,er = @ 8/7/17 2:49 PM; Average background @ 8/7/17 2:49 PM; Ar40 bk val,er = @ 8/7/17 2:49 PM; Average background @ 8/7/17 2:49 PM; Ar39 bk val,er = @ 8/7/17 2:49 PM; Average background @ 8/7/17 2:49 PM; Ar38 bk val,er = @ 8/7/17 2:49 PM; Average backg…	N:9	LPPLLPAAAAAA	1	Pychron Script	1	Fusions CO2	5	0	0	0	0	30	30	146			0
	01	5	6.76885	0.0260318	7.2151	3.1768	19.5993	68.4922	23.3765	0.0365831	0.0017491								65735-01	K17-BS-1	37	2017-07-07	2.51667	3582239000	Heizler, M	Sanidine	9	IR1009		129.138.12.160	7.875	Ar40 = L @ 8/7/17 9:39 AM; Ar39 = L @ 8/7/17 9:39 AM; Ar38 = L @ 8/7/17 9:39 AM; Ar37 = L @ 8/7/17 9:39 AM; Ar36 = L @ 8/7/17 9:39 AM; Ar40 = P @ 8/7/17 9:40 AM; Ar39 = P @ 8/7/17 9:40 AM; Ar38 = L @ 8/7/17 9:40 AM; Ar37 = L @ 8/7/17 9:40 AM; Ar36 = P @ 8/7/17 9:40 AM; Ar41 bk val,er = @ 8/7/17 2:49 PM; Average background @ 8/7/17 2:49 PM; Ar40 bk val,er = @ 8/7/17 2:49 PM; Average background @ 8…	N:9	LPPLLPAAAAAA	1	Pychron Script	1	Fusions CO2	5	0	0	0	0	30	30	81			0
	28	5	4.86932	0.0064022	0.3643	10.0732	79.692	97.7959	23.9946	0.0060707	0.0017491								65735-28	K17-BS-1	37	2017-07-07	18.4	3582297000	Heizler, M	Sanidine	9	IR1009		129.138.12.160	7.875	Ar40 = L @ 8/7/17 9:39 AM; Ar39 = L @ 8/7/17 9:39 AM; Ar38 = L @ 8/7/17 9:39 AM; Ar37 = L @ 8/7/17 9:39 AM; Ar36 = L @ 8/7/17 9:39 AM; Ar40 = P @ 8/7/17 9:41 AM; Ar39 = P @ 8/7/17 9:41 AM; Ar38 = L @ 8/7/17 9:41 AM; Ar37 = L @ 8/7/17 9:41 AM; Ar36 = P @ 8/7/17 9:41 AM; Ar41 bk val,er = @ 8/7/17 2:49 PM; Average background @ 8/7/17 2:49 PM; Ar40 bk val,er = @ 8/7/17 2:49 PM; Average background @ 8…	N:9	LPPLLPAAAAAA	1	Pychron Script	1	Fusions CO2	5	0	0	0	0	30	30	110			0
	45	5	5.12943	0.0110039	0.4871	3.97211	46.3657	97.2063	25.1186	0.01246	0.0017491								65735-45	K17-BS-1	37	2017-07-07	23.1	3582314000	Heizler, M	Sanidine	9	IR1009		129.138.12.160	7.875	Ar40 = P @ 8/7/17 9:41 AM; Ar39 = P @ 8/7/17 9:41 AM; Ar38 = L @ 8/7/17 9:41 AM; Ar37 = L @ 8/7/17 9:41 AM; Ar36 = P @ 8/7/17 9:41 AM; Ar41 bk val,er = @ 8/7/17 2:49 PM; Average background @ 8/7/17 2:49 PM; Ar40 bk val,er = @ 8/7/17 2:49 PM; Average background @ 8/7/17 2:49 PM; Ar39 bk val,er = @ 8/7/17 2:49 PM; Average background @ 8/7/17 2:49 PM; Ar38 bk val,er = @ 8/7/17 2:49 PM; Average backg…	N:9	LPPLLPAAAAAA	1	Pychron Script	1	Fusions CO2	5	0	0	0	0	30	30	127			0
	63	5	5.28952	0.0068274	0.697	4.12601	74.7289	96.1105	25.6084	0.0124417	0.0017491								65735-63	K17-BS-1	37	2017-07-08	4.21667	3582332000	Heizler, M	Sanidine	9	IR1009		129.138.12.160	7.875	Ar40 = P @ 8/7/17 9:41 AM; Ar39 = P @ 8/7/17 9:41 AM; Ar38 = L @ 8/7/17 9:41 AM; Ar37 = L @ 8/7/17 9:41 AM; Ar36 = P @ 8/7/17 9:41 AM; Ar41 bk val,er = @ 8/7/17 2:49 PM; Average background @ 8/7/17 2:49 PM; Ar40 bk val,er = @ 8/7/17 2:49 PM; Average background @ 8/7/17 2:49 PM; Ar39 bk val,er = @ 8/7/17 2:49 PM; Average background @ 8/7/17 2:49 PM; Ar38 bk val,er = @ 8/7/17 2:49 PM; Average backg…	N:9	LPPLLPAAAAAA	1	Pychron Script	1	Fusions CO2	5	0	0	0	0	30	30	145			0
	20	5	5.33089	0.0050382	0.8007	3.28937	101.267	95.5622	25.6613	0.0157815	0.0017491								65735-20	K17-BS-1	37	2017-07-07	16.2833	3582289000	Heizler, M	Sanidine	9	IR1009		129.138.12.160	7.875	Ar40 = L @ 8/7/17 9:39 AM; Ar39 = L @ 8/7/17 9:39 AM; Ar38 = L @ 8/7/17 9:39 AM; Ar37 = L @ 8/7/17 9:39 AM; Ar36 = L @ 8/7/17 9:39 AM; Ar40 = P @ 8/7/17 9:40 AM; Ar39 = P @ 8/7/17 9:40 AM; Ar38 = L @ 8/7/17 9:40 AM; Ar37 = L @ 8/7/17 9:40 AM; Ar36 = P @ 8/7/17 9:40 AM; Ar41 bk val,er = @ 8/7/17 2:49 PM; Average background @ 8/7/17 2:49 PM; Ar40 bk val,er = @ 8/7/17 2:49 PM; Average background @ 8…	N:9	LPPLLPAAAAAA	1	Pychron Script	1	Fusions CO2	5	0	0	0	0	30	30	102			0
	11	5	5.95218	0.0102136	2.4068	5.66373	49.9534	88.0473	26.3982	0.0165639	0.0017491								65735-11	K17-BS-1	37	2017-07-07	11.45	3582272000	Heizler, M	Sanidine	9	IR1009		129.138.12.160	7.875	Ar40 = L @ 8/7/17 9:39 AM; Ar39 = L @ 8/7/17 9:39 AM; Ar38 = L @ 8/7/17 9:39 AM; Ar37 = L @ 8/7/17 9:39 AM; Ar36 = L @ 8/7/17 9:39 AM; Ar40 = P @ 8/7/17 9:40 AM; Ar39 = P @ 8/7/17 9:40 AM; Ar38 = L @ 8/7/17 9:40 AM; Ar37 = L @ 8/7/17 9:40 AM; Ar36 = P @ 8/7/17 9:40 AM; Ar41 bk val,er = @ 8/7/17 2:49 PM; Average background @ 8/7/17 2:49 PM; Ar40 bk val,er = @ 8/7/17 2:49 PM; Average background @ 8…	N:9	LPPLLPAAAAAA	1	Pychron Script	1	Fusions CO2	5	0	0	0	0	30	30	92			0
	05	5	5.42858	0.0066289	0.3158	6.43955	76.9666	98.288	26.8689	0.0080243	0.0017491								65735-05	K17-BS-1	37	2017-07-07	9.75	3582266000	Heizler, M	Sanidine	9	IR1009		129.138.12.160	7.875	Ar40 = L @ 8/7/17 9:39 AM; Ar39 = L @ 8/7/17 9:39 AM; Ar38 = L @ 8/7/17 9:39 AM; Ar37 = L @ 8/7/17 9:39 AM; Ar36 = L @ 8/7/17 9:39 AM; Ar40 = P @ 8/7/17 9:40 AM; Ar39 = P @ 8/7/17 9:40 AM; Ar38 = L @ 8/7/17 9:40 AM; Ar37 = L @ 8/7/17 9:40 AM; Ar36 = P @ 8/7/17 9:40 AM; Ar41 bk val,er = @ 8/7/17 2:49 PM; Average background @ 8/7/17 2:49 PM; Ar40 bk val,er = @ 8/7/17 2:49 PM; Average background @ 8…	N:9	LPPLLPAAAAAA	1	Pychron Script	1	Fusions CO2	5	0	0	0	0	30	30	86			0
	69	5	5.79245	0.0081945	1.5146	0.742653	62.2618	92.2733	26.9179	0.0576669	0.0017491								65735-69	K17-BS-1	37	2017-07-08	5.7	3582337000	Heizler, M	Sanidine	9	IR1009		129.138.12.160	7.875	Ar40 = P @ 8/7/17 9:41 AM; Ar39 = P @ 8/7/17 9:41 AM; Ar38 = L @ 8/7/17 9:41 AM; Ar37 = L @ 8/7/17 9:41 AM; Ar36 = P @ 8/7/17 9:41 AM; Ar41 bk val,er = @ 8/7/17 2:49 PM; Average background @ 8/7/17 2:49 PM; Ar40 bk val,er = @ 8/7/17 2:49 PM; Average background @ 8/7/17 2:49 PM; Ar39 bk val,er = @ 8/7/17 2:49 PM; Average background @ 8/7/17 2:49 PM; Ar38 bk val,er = @ 8/7/17 2:49 PM; Average backg…	N:9	LPPLLPAAAAAA	1	Pychron Script	1	Fusions CO2	5	0	0	0	0	30	30	151			0
	23	5	5.47637	0.008498	0.2227	5.94128	60.0381	98.8091	27.2468	0.0081909	0.0017491								65735-23	K17-BS-1	37	2017-07-07	16.9167	3582291000	Heizler, M	Sanidine	9	IR1009		129.138.12.160	7.875	Ar40 = L @ 8/7/17 9:39 AM; Ar39 = L @ 8/7/17 9:39 AM; Ar38 = L @ 8/7/17 9:39 AM; Ar37 = L @ 8/7/17 9:39 AM; Ar36 = L @ 8/7/17 9:39 AM; Ar40 = P @ 8/7/17 9:41 AM; Ar39 = P @ 8/7/17 9:41 AM; Ar38 = L @ 8/7/17 9:41 AM; Ar37 = L @ 8/7/17 9:41 AM; Ar36 = P @ 8/7/17 9:41 AM; Ar41 bk val,er = @ 8/7/17 2:49 PM; Average background @ 8/7/17 2:49 PM; Ar40 bk val,er = @ 8/7/17 2:49 PM; Average background @ 8…	N:9	LPPLLPAAAAAA	1	Pychron Script	1	Fusions CO2	5	0	0	0	0	30	30	105			0
	19	5	5.71354	0.0074214	0.5397	3.41774	68.7477	97.2148	27.9644	0.0142261	0.0017491								65735-19	K17-BS-1	37	2017-07-07	16.0667	3582288000	Heizler, M	Sanidine	9	IR1009		129.138.12.160	7.875	Ar40 = L @ 8/7/17 9:39 AM; Ar39 = L @ 8/7/17 9:39 AM; Ar38 = L @ 8/7/17 9:39 AM; Ar37 = L @ 8/7/17 9:39 AM; Ar36 = L @ 8/7/17 9:39 AM; Ar40 = P @ 8/7/17 9:40 AM; Ar39 = P @ 8/7/17 9:40 AM; Ar38 = L @ 8/7/17 9:40 AM; Ar37 = L @ 8/7/17 9:40 AM; Ar36 = P @ 8/7/17 9:40 AM; Ar41 bk val,er = @ 8/7/17 2:49 PM; Average background @ 8/7/17 2:49 PM; Ar40 bk val,er = @ 8/7/17 2:49 PM; Average background @ 8…	N:9	LPPLLPAAAAAA	1	Pychron Script	1	Fusions CO2	5	0	0	0	0	30	30	101			0
	62	5	5.74108	0.0051678	0.4988	5.28859	98.7275	97.4358	28.1617	0.0099711	0.0017491								65735-62	K17-BS-1	37	2017-07-08	3.8	3582330000	Heizler, M	Sanidine	9	IR1009		129.138.12.160	7.875	Ar40 = P @ 8/7/17 9:41 AM; Ar39 = P @ 8/7/17 9:41 AM; Ar38 = L @ 8/7/17 9:41 AM; Ar37 = L @ 8/7/17 9:41 AM; Ar36 = P @ 8/7/17 9:41 AM; Ar41 bk val,er = @ 8/7/17 2:49 PM; Average background @ 8/7/17 2:49 PM; Ar40 bk val,er = @ 8/7/17 2:49 PM; Average background @ 8/7/17 2:49 PM; Ar39 bk val,er = @ 8/7/17 2:49 PM; Average background @ 8/7/17 2:49 PM; Ar38 bk val,er = @ 8/7/17 2:49 PM; Average backg…	N:9	LPPLLPAAAAAA	1	Pychron Script	1	Fusions CO2	5	0	0	0	0	30	30	144			0
	49	5	5.75881	0.0111614	0.4679	7.09361	45.7115	97.611	28.2987	0.0084818	0.0017491								65735-49	K17-BS-1	37	2017-07-07	23.95	3582317000	Heizler, M	Sanidine	9	IR1009		129.138.12.160	7.875	Ar40 = P @ 8/7/17 9:41 AM; Ar39 = P @ 8/7/17 9:41 AM; Ar38 = L @ 8/7/17 9:41 AM; Ar37 = L @ 8/7/17 9:41 AM; Ar36 = P @ 8/7/17 9:41 AM; Ar41 bk val,er = @ 8/7/17 2:49 PM; Average background @ 8/7/17 2:49 PM; Ar40 bk val,er = @ 8/7/17 2:49 PM; Average background @ 8/7/17 2:49 PM; Ar39 bk val,er = @ 8/7/17 2:49 PM; Average background @ 8/7/17 2:49 PM; Ar38 bk val,er = @ 8/7/17 2:49 PM; Average backg…	N:9	LPPLLPAAAAAA	1	Pychron Script	1	Fusions CO2	5	0	0	0	0	30	30	131			0
	73	5	6.2585	0.0086536	1.9953	0.572708	58.9586	90.5769	28.5395	0.0736848	0.0017491								65735-73	K17-BS-1	37	2017-07-08	6.76667	3582341000	Heizler, M	Sanidine	9	IR1009		129.138.12.160	7.875	Ar40 = P @ 8/7/17 9:41 AM; Ar39 = P @ 8/7/17 9:41 AM; Ar38 = L @ 8/7/17 9:41 AM; Ar37 = L @ 8/7/17 9:41 AM; Ar36 = P @ 8/7/17 9:41 AM; Ar41 bk val,er = @ 8/7/17 2:49 PM; Average background @ 8/7/17 2:49 PM; Ar40 bk val,er = @ 8/7/17 2:49 PM; Average background @ 8/7/17 2:49 PM; Ar39 bk val,er = @ 8/7/17 2:49 PM; Average background @ 8/7/17 2:49 PM; Ar38 bk val,er = @ 8/7/17 2:49 PM; Average backg…	N:9	LPPLLPAAAAAA	1	Pychron Script	1	Fusions CO2	5	0	0	0	0	30	30	155			0
	17	5	6.61191	0.0164344	3.1447	0.465054	31.0449	85.9474	28.6118	0.0976298	0.0017491								65735-17	K17-BS-1	37	2017-07-07	15.1833	3582285000	Heizler, M	Sanidine	9	IR1009		129.138.12.160	7.875	Ar40 = L @ 8/7/17 9:39 AM; Ar39 = L @ 8/7/17 9:39 AM; Ar38 = L @ 8/7/17 9:39 AM; Ar37 = L @ 8/7/17 9:39 AM; Ar36 = L @ 8/7/17 9:39 AM; Ar40 = P @ 8/7/17 9:40 AM; Ar39 = P @ 8/7/17 9:40 AM; Ar38 = L @ 8/7/17 9:40 AM; Ar37 = L @ 8/7/17 9:40 AM; Ar36 = P @ 8/7/17 9:40 AM; Ar41 bk val,er = @ 8/7/17 2:49 PM; Average background @ 8/7/17 2:49 PM; Ar40 bk val,er = @ 8/7/17 2:49 PM; Average background @ 8…	N:9	LPPLLPAAAAAA	1	Pychron Script	1	Fusions CO2	5	0	0	0	0	30	30	99			0
	38	5	6.11033	0.0155464	1.3644	1.52158	32.8181	93.413	28.7339	0.0309976	0.0017491								65735-38	K17-BS-1	37	2017-07-07	20.7333	3582305000	Heizler, M	Sanidine	9	IR1009		129.138.12.160	7.875	Ar40 = P @ 8/7/17 9:41 AM; Ar39 = P @ 8/7/17 9:41 AM; Ar38 = L @ 8/7/17 9:41 AM; Ar37 = L @ 8/7/17 9:41 AM; Ar36 = P @ 8/7/17 9:41 AM; Ar41 bk val,er = @ 8/7/17 2:49 PM; Average background @ 8/7/17 2:49 PM; Ar40 bk val,er = @ 8/7/17 2:49 PM; Average background @ 8/7/17 2:49 PM; Ar39 bk val,er = @ 8/7/17 2:49 PM; Average background @ 8/7/17 2:49 PM; Ar38 bk val,er = @ 8/7/17 2:49 PM; Average backg…	N:9	LPPLLPAAAAAA	1	Pychron Script	1	Fusions CO2	5	0	0	0	0	30	30	120			0
	08	5	5.78543	0.0154472	0.2577	7.34455	33.0289	98.7036	28.7445	0.0073785	0.0017491								65735-08	K17-BS-1	37	2017-07-07	10.4	3582268000	Heizler, M	Sanidine	9	IR1009		129.138.12.160	7.875	Ar40 = L @ 8/7/17 9:39 AM; Ar39 = L @ 8/7/17 9:39 AM; Ar38 = L @ 8/7/17 9:39 AM; Ar37 = L @ 8/7/17 9:39 AM; Ar36 = L @ 8/7/17 9:39 AM; Ar40 = P @ 8/7/17 9:40 AM; Ar39 = P @ 8/7/17 9:40 AM; Ar38 = L @ 8/7/17 9:40 AM; Ar37 = L @ 8/7/17 9:40 AM; Ar36 = P @ 8/7/17 9:40 AM; Ar41 bk val,er = @ 8/7/17 2:49 PM; Average background @ 8/7/17 2:49 PM; Ar40 bk val,er = @ 8/7/17 2:49 PM; Average background @ 8…	N:9	LPPLLPAAAAAA	1	Pychron Script	1	Fusions CO2	5	0	0	0	0	30	30	89			0
	07	5	5.78049	0.0159536	0.2092	6.53559	31.9805	98.9514	28.7917	0.0076257	0.0017491								65735-07	K17-BS-1	37	2017-07-07	10.1833	3582267000	Heizler, M	Sanidine	9	IR1009		129.138.12.160	7.875	Ar40 = L @ 8/7/17 9:39 AM; Ar39 = L @ 8/7/17 9:39 AM; Ar38 = L @ 8/7/17 9:39 AM; Ar37 = L @ 8/7/17 9:39 AM; Ar36 = L @ 8/7/17 9:39 AM; Ar40 = P @ 8/7/17 9:40 AM; Ar39 = P @ 8/7/17 9:40 AM; Ar38 = L @ 8/7/17 9:40 AM; Ar37 = L @ 8/7/17 9:40 AM; Ar36 = P @ 8/7/17 9:40 AM; Ar41 bk val,er = @ 8/7/17 2:49 PM; Average background @ 8/7/17 2:49 PM; Ar40 bk val,er = @ 8/7/17 2:49 PM; Average background @ 8…	N:9	LPPLLPAAAAAA	1	Pychron Script	1	Fusions CO2	5	0	0	0	0	30	30	88			0
	34	5	6.38288	0.0260954	2.1756	1.13078	19.5515	89.9468	28.9025	0.0438748	0.0017491								65735-34	K17-BS-1	37	2017-07-07	19.8833	3582302000	Heizler, M	Sanidine	9	IR1009		129.138.12.160	7.875	Ar40 = P @ 8/7/17 9:41 AM; Ar39 = P @ 8/7/17 9:41 AM; Ar38 = L @ 8/7/17 9:41 AM; Ar37 = L @ 8/7/17 9:41 AM; Ar36 = P @ 8/7/17 9:41 AM; Ar41 bk val,er = @ 8/7/17 2:49 PM; Average background @ 8/7/17 2:49 PM; Ar40 bk val,er = @ 8/7/17 2:49 PM; Average background @ 8/7/17 2:49 PM; Ar39 bk val,er = @ 8/7/17 2:49 PM; Average background @ 8/7/17 2:49 PM; Ar38 bk val,er = @ 8/7/17 2:49 PM; Average backg…	N:9	LPPLLPAAAAAA	1	Pychron Script	1	Fusions CO2	5	0	0	0	0	30	30	116			0
	32	5	6.05615	0.0064359	0.4489	2.71212	79.2747	97.8151	29.8118	0.0169313	0.0017491								65735-32	K17-BS-1	37	2017-07-07	19.25	3582300000	Heizler, M	Sanidine	9	IR1009		129.138.12.160	7.875	Ar40 = P @ 8/7/17 9:41 AM; Ar39 = P @ 8/7/17 9:41 AM; Ar38 = L @ 8/7/17 9:41 AM; Ar37 = L @ 8/7/17 9:41 AM; Ar36 = P @ 8/7/17 9:41 AM; Ar41 bk val,er = @ 8/7/17 2:49 PM; Average background @ 8/7/17 2:49 PM; Ar40 bk val,er = @ 8/7/17 2:49 PM; Average background @ 8/7/17 2:49 PM; Ar39 bk val,er = @ 8/7/17 2:49 PM; Average background @ 8/7/17 2:49 PM; Ar38 bk val,er = @ 8/7/17 2:49 PM; Average backg…	N:9	LPPLLPAAAAAA	1	Pychron Script	1	Fusions CO2	5	0	0	0	0	30	30	114			0
	66	5	6.34442	0.0072939	1.3992	0.453524	69.9494	93.4832	29.8495	0.0889085	0.0017491								65735-66	K17-BS-1	37	2017-07-08	4.85	3582334000	Heizler, M	Sanidine	9	IR1009		129.138.12.160	7.875	Ar40 = P @ 8/7/17 9:41 AM; Ar39 = P @ 8/7/17 9:41 AM; Ar38 = L @ 8/7/17 9:41 AM; Ar37 = L @ 8/7/17 9:41 AM; Ar36 = P @ 8/7/17 9:41 AM; Ar41 bk val,er = @ 8/7/17 2:49 PM; Average background @ 8/7/17 2:49 PM; Ar40 bk val,er = @ 8/7/17 2:49 PM; Average background @ 8/7/17 2:49 PM; Ar39 bk val,er = @ 8/7/17 2:49 PM; Average background @ 8/7/17 2:49 PM; Ar38 bk val,er = @ 8/7/17 2:49 PM; Average backg…	N:9	LPPLLPAAAAAA	1	Pychron Script	1	Fusions CO2	5	0	0	0	0	30	30	148			0
	04	5	6.07935	0.0062084	0.2991	5.47788	82.1796	98.5523	30.149	0.0094367	0.0017491								65735-04	K17-BS-1	37	2017-07-07	9.53333	3582265000	Heizler, M	Sanidine	9	IR1009		129.138.12.160	7.875	Ar40 = L @ 8/7/17 9:39 AM; Ar39 = L @ 8/7/17 9:39 AM; Ar38 = L @ 8/7/17 9:39 AM; Ar37 = L @ 8/7/17 9:39 AM; Ar36 = L @ 8/7/17 9:39 AM; Ar40 = P @ 8/7/17 9:40 AM; Ar39 = P @ 8/7/17 9:40 AM; Ar38 = L @ 8/7/17 9:40 AM; Ar37 = L @ 8/7/17 9:40 AM; Ar36 = P @ 8/7/17 9:40 AM; Ar41 bk val,er = @ 8/7/17 2:49 PM; Average background @ 8/7/17 2:49 PM; Ar40 bk val,er = @ 8/7/17 2:49 PM; Average background @ 8…	N:9	LPPLLPAAAAAA	1	Pychron Script	1	Fusions CO2	5	0	0	0	0	30	30	85			0
	14	5	6.13169	0.0068077	0.0788	5.58916	74.9451	99.6288	30.7362	0.0084974	0.0017491								65735-14	K17-BS-1	37	2017-07-07	14.3333	3582282000	Heizler, M	Sanidine	9	IR1009		129.138.12.160	7.875	Ar40 = L @ 8/7/17 9:39 AM; Ar39 = L @ 8/7/17 9:39 AM; Ar38 = L @ 8/7/17 9:39 AM; Ar37 = L @ 8/7/17 9:39 AM; Ar36 = L @ 8/7/17 9:39 AM; Ar40 = P @ 8/7/17 9:40 AM; Ar39 = P @ 8/7/17 9:40 AM; Ar38 = L @ 8/7/17 9:40 AM; Ar37 = L @ 8/7/17 9:40 AM; Ar36 = P @ 8/7/17 9:40 AM; Ar41 bk val,er = @ 8/7/17 2:49 PM; Average background @ 8/7/17 2:49 PM; Ar40 bk val,er = @ 8/7/17 2:49 PM; Average background @ 8…	N:9	LPPLLPAAAAAA	1	Pychron Script	1	Fusions CO2	5	0	0	0	0	30	30	96			0
	48	5	6.15706	0.004905	0.0876	4.66811	104.017	99.5855	30.8491	0.0097109	0.0017491								65735-48	K17-BS-1	37	2017-07-07	23.7333	3582316000	Heizler, M	Sanidine	9	IR1009		129.138.12.160	7.875	Ar40 = P @ 8/7/17 9:41 AM; Ar39 = P @ 8/7/17 9:41 AM; Ar38 = L @ 8/7/17 9:41 AM; Ar37 = L @ 8/7/17 9:41 AM; Ar36 = P @ 8/7/17 9:41 AM; Ar41 bk val,er = @ 8/7/17 2:49 PM; Average background @ 8/7/17 2:49 PM; Ar40 bk val,er = @ 8/7/17 2:49 PM; Average background @ 8/7/17 2:49 PM; Ar39 bk val,er = @ 8/7/17 2:49 PM; Average background @ 8/7/17 2:49 PM; Ar38 bk val,er = @ 8/7/17 2:49 PM; Average backg…	N:9	LPPLLPAAAAAA	1	Pychron Script	1	Fusions CO2	5	0	0	0	0	30	30	130			0
	56	5	6.3414	0.0078417	0.0819	8.77958	65.0629	99.628	31.7795	0.0062377	0.0017491								65735-56	K17-BS-1	37	2017-07-08	2.06667	3582324000	Heizler, M	Sanidine	9	IR1009		129.138.12.160	7.875	Ar40 = P @ 8/7/17 9:41 AM; Ar39 = P @ 8/7/17 9:41 AM; Ar38 = L @ 8/7/17 9:41 AM; Ar37 = L @ 8/7/17 9:41 AM; Ar36 = P @ 8/7/17 9:41 AM; Ar41 bk val,er = @ 8/7/17 2:49 PM; Average background @ 8/7/17 2:49 PM; Ar40 bk val,er = @ 8/7/17 2:49 PM; Average background @ 8/7/17 2:49 PM; Ar39 bk val,er = @ 8/7/17 2:49 PM; Average background @ 8/7/17 2:49 PM; Ar38 bk val,er = @ 8/7/17 2:49 PM; Average backg…	N:9	LPPLLPAAAAAA	1	Pychron Script	1	Fusions CO2	5	0	0	0	0	30	30	138			0
	29	5	6.53888	0.0130261	0.5352	7.28309	39.1678	97.5948	32.0991	0.008196	0.0017491								65735-29	K17-BS-1	37	2017-07-07	18.6167	3582297000	Heizler, M	Sanidine	9	IR1009		129.138.12.160	7.875	Ar40 = L @ 8/7/17 9:39 AM; Ar39 = L @ 8/7/17 9:39 AM; Ar38 = L @ 8/7/17 9:39 AM; Ar37 = L @ 8/7/17 9:39 AM; Ar36 = L @ 8/7/17 9:39 AM; Ar40 = P @ 8/7/17 9:41 AM; Ar39 = P @ 8/7/17 9:41 AM; Ar38 = L @ 8/7/17 9:41 AM; Ar37 = L @ 8/7/17 9:41 AM; Ar36 = P @ 8/7/17 9:41 AM; Ar41 bk val,er = @ 8/7/17 2:49 PM; Average background @ 8/7/17 2:49 PM; Ar40 bk val,er = @ 8/7/17 2:49 PM; Average background @ 8…	N:9	LPPLLPAAAAAA	1	Pychron Script	1	Fusions CO2	5	0	0	0	0	30	30	111			0
	27	5	6.51527	0.0094747	0.3198	7.00198	53.8491	98.5593	32.2973	0.0082344	0.0017491								65735-27	K17-BS-1	37	2017-07-07	18.1833	3582296000	Heizler, M	Sanidine	9	IR1009		129.138.12.160	7.875	Ar40 = L @ 8/7/17 9:39 AM; Ar39 = L @ 8/7/17 9:39 AM; Ar38 = L @ 8/7/17 9:39 AM; Ar37 = L @ 8/7/17 9:39 AM; Ar36 = L @ 8/7/17 9:39 AM; Ar40 = P @ 8/7/17 9:41 AM; Ar39 = P @ 8/7/17 9:41 AM; Ar38 = L @ 8/7/17 9:41 AM; Ar37 = L @ 8/7/17 9:41 AM; Ar36 = P @ 8/7/17 9:41 AM; Ar41 bk val,er = @ 8/7/17 2:49 PM; Average background @ 8/7/17 2:49 PM; Ar40 bk val,er = @ 8/7/17 2:49 PM; Average background @ 8…	N:9	LPPLLPAAAAAA	1	Pychron Script	1	Fusions CO2	5	0	0	0	0	30	30	109			0
	30	5	6.55524	0.0086691	0.421	3.56396	58.8532	98.1105	32.3472	0.0136957	0.0017491								65735-30	K17-BS-1	37	2017-07-07	18.8167	3582298000	Heizler, M	Sanidine	9	IR1009		129.138.12.160	7.875	Ar40 = L @ 8/7/17 9:39 AM; Ar39 = L @ 8/7/17 9:39 AM; Ar38 = L @ 8/7/17 9:39 AM; Ar37 = L @ 8/7/17 9:39 AM; Ar36 = L @ 8/7/17 9:39 AM; Ar40 = P @ 8/7/17 9:41 AM; Ar39 = P @ 8/7/17 9:41 AM; Ar38 = L @ 8/7/17 9:41 AM; Ar37 = L @ 8/7/17 9:41 AM; Ar36 = P @ 8/7/17 9:41 AM; Ar41 bk val,er = @ 8/7/17 2:49 PM; Average background @ 8/7/17 2:49 PM; Ar40 bk val,er = @ 8/7/17 2:49 PM; Average background @ 8…	N:9	LPPLLPAAAAAA	1	Pychron Script	1	Fusions CO2	5	0	0	0	0	30	30	112			0
	18	5	6.50727	0.0089333	0.2582	5.74326	57.1126	98.8369	32.348	0.0093497	0.0017491								65735-18	K17-BS-1	37	2017-07-07	15.4	3582286000	Heizler, M	Sanidine	9	IR1009		129.138.12.160	7.875	Ar40 = L @ 8/7/17 9:39 AM; Ar39 = L @ 8/7/17 9:39 AM; Ar38 = L @ 8/7/17 9:39 AM; Ar37 = L @ 8/7/17 9:39 AM; Ar36 = L @ 8/7/17 9:39 AM; Ar40 = P @ 8/7/17 9:40 AM; Ar39 = P @ 8/7/17 9:40 AM; Ar38 = L @ 8/7/17 9:40 AM; Ar37 = L @ 8/7/17 9:40 AM; Ar36 = P @ 8/7/17 9:40 AM; Ar41 bk val,er = @ 8/7/17 2:49 PM; Average background @ 8/7/17 2:49 PM; Ar40 bk val,er = @ 8/7/17 2:49 PM; Average background @ 8…	N:9	LPPLLPAAAAAA	1	Pychron Script	1	Fusions CO2	5	0	0	0	0	30	30	100			0
	54	5	6.50369	0.0082781	0.2427	4.88595	61.633	98.9063	32.3528	0.0102367	0.0017491								65735-54	K17-BS-1	37	2017-07-08	1.63333	3582323000	Heizler, M	Sanidine	9	IR1009		129.138.12.160	7.875	Ar40 = P @ 8/7/17 9:41 AM; Ar39 = P @ 8/7/17 9:41 AM; Ar38 = L @ 8/7/17 9:41 AM; Ar37 = L @ 8/7/17 9:41 AM; Ar36 = P @ 8/7/17 9:41 AM; Ar41 bk val,er = @ 8/7/17 2:49 PM; Average background @ 8/7/17 2:49 PM; Ar40 bk val,er = @ 8/7/17 2:49 PM; Average background @ 8/7/17 2:49 PM; Ar39 bk val,er = @ 8/7/17 2:49 PM; Average background @ 8/7/17 2:49 PM; Ar38 bk val,er = @ 8/7/17 2:49 PM; Average backg…	N:9	LPPLLPAAAAAA	1	Pychron Script	1	Fusions CO2	5	0	0	0	0	30	30	136			0
	13	5	6.60739	0.0084298	0.5583	6.95406	60.5239	97.5103	32.4049	0.0086529	0.0017491								65735-13	K17-BS-1	37	2017-07-07	11.8667	3582273000	Heizler, M	Sanidine	9	IR1009		129.138.12.160	7.875	Ar40 = L @ 8/7/17 9:39 AM; Ar39 = L @ 8/7/17 9:39 AM; Ar38 = L @ 8/7/17 9:39 AM; Ar37 = L @ 8/7/17 9:39 AM; Ar36 = L @ 8/7/17 9:39 AM; Ar40 = P @ 8/7/17 9:40 AM; Ar39 = P @ 8/7/17 9:40 AM; Ar38 = L @ 8/7/17 9:40 AM; Ar37 = L @ 8/7/17 9:40 AM; Ar36 = P @ 8/7/17 9:40 AM; Ar41 bk val,er = @ 8/7/17 2:49 PM; Average background @ 8/7/17 2:49 PM; Ar40 bk val,er = @ 8/7/17 2:49 PM; Average background @ 8…	N:9	LPPLLPAAAAAA	1	Pychron Script	1	Fusions CO2	5	0	0	0	0	30	30	94			0
	46	5	7.10789	0.0061117	2.0864	0.493139	83.4799	91.3226	32.6484	0.0874248	0.0017491								65735-46	K17-BS-1	37	2017-07-07	23.3	3582314000	Heizler, M	Sanidine	9	IR1009		129.138.12.160	7.875	Ar40 = P @ 8/7/17 9:41 AM; Ar39 = P @ 8/7/17 9:41 AM; Ar38 = L @ 8/7/17 9:41 AM; Ar37 = L @ 8/7/17 9:41 AM; Ar36 = P @ 8/7/17 9:41 AM; Ar41 bk val,er = @ 8/7/17 2:49 PM; Average background @ 8/7/17 2:49 PM; Ar40 bk val,er = @ 8/7/17 2:49 PM; Average background @ 8/7/17 2:49 PM; Ar39 bk val,er = @ 8/7/17 2:49 PM; Average background @ 8/7/17 2:49 PM; Ar38 bk val,er = @ 8/7/17 2:49 PM; Average backg…	N:9	LPPLLPAAAAAA	1	Pychron Script	1	Fusions CO2	5	0	0	0	0	30	30	128			0
	61	5	6.77646	0.0060079	0.7236	4.87724	84.9222	96.8478	33.004	0.0126015	0.0017491								65735-61	K17-BS-1	37	2017-07-08	3.58333	3582330000	Heizler, M	Sanidine	9	IR1009		129.138.12.160	7.875	Ar40 = P @ 8/7/17 9:41 AM; Ar39 = P @ 8/7/17 9:41 AM; Ar38 = L @ 8/7/17 9:41 AM; Ar37 = L @ 8/7/17 9:41 AM; Ar36 = P @ 8/7/17 9:41 AM; Ar41 bk val,er = @ 8/7/17 2:49 PM; Average background @ 8/7/17 2:49 PM; Ar40 bk val,er = @ 8/7/17 2:49 PM; Average background @ 8/7/17 2:49 PM; Ar39 bk val,er = @ 8/7/17 2:49 PM; Average background @ 8/7/17 2:49 PM; Ar38 bk val,er = @ 8/7/17 2:49 PM; Average backg…	N:9	LPPLLPAAAAAA	1	Pychron Script	1	Fusions CO2	5	0	0	0	0	30	30	143			0
	60	5	6.63062	0.0181997	0.2171	6.99929	28.0336	99.0535	33.0283	0.0076735	0.0017491								65735-60	K17-BS-1	37	2017-07-08	3.36667	3582329000	Heizler, M	Sanidine	9	IR1009		129.138.12.160	7.875	Ar40 = P @ 8/7/17 9:41 AM; Ar39 = P @ 8/7/17 9:41 AM; Ar38 = L @ 8/7/17 9:41 AM; Ar37 = L @ 8/7/17 9:41 AM; Ar36 = P @ 8/7/17 9:41 AM; Ar41 bk val,er = @ 8/7/17 2:49 PM; Average background @ 8/7/17 2:49 PM; Ar40 bk val,er = @ 8/7/17 2:49 PM; Average background @ 8/7/17 2:49 PM; Ar39 bk val,er = @ 8/7/17 2:49 PM; Average background @ 8/7/17 2:49 PM; Ar38 bk val,er = @ 8/7/17 2:49 PM; Average backg…	N:9	LPPLLPAAAAAA	1	Pychron Script	1	Fusions CO2	5	0	0	0	0	30	30	142			0
	68	5	6.62573	0.0045381	0.1673	7.68031	112.427	99.2585	33.0715	0.0070647	0.0017491								65735-68	K17-BS-1	37	2017-07-08	5.28333	3582336000	Heizler, M	Sanidine	9	IR1009		129.138.12.160	7.875	Ar40 = P @ 8/7/17 9:41 AM; Ar39 = P @ 8/7/17 9:41 AM; Ar38 = L @ 8/7/17 9:41 AM; Ar37 = L @ 8/7/17 9:41 AM; Ar36 = P @ 8/7/17 9:41 AM; Ar41 bk val,er = @ 8/7/17 2:49 PM; Average background @ 8/7/17 2:49 PM; Ar40 bk val,er = @ 8/7/17 2:49 PM; Average background @ 8/7/17 2:49 PM; Ar39 bk val,er = @ 8/7/17 2:49 PM; Average background @ 8/7/17 2:49 PM; Ar38 bk val,er = @ 8/7/17 2:49 PM; Average backg…	N:9	LPPLLPAAAAAA	1	Pychron Script	1	Fusions CO2	5	0	0	0	0	30	30	150			0
	02	5	6.68516	0.0056605	0.2214	9.01201	90.1341	99.027	33.2887	0.0063868	0.0017491								65735-02	K17-BS-1	37	2017-07-07	8.9	3582262000	Heizler, M	Sanidine	9	IR1009		129.138.12.160	7.875	Ar40 = L @ 8/7/17 9:39 AM; Ar39 = L @ 8/7/17 9:39 AM; Ar38 = L @ 8/7/17 9:39 AM; Ar37 = L @ 8/7/17 9:39 AM; Ar36 = L @ 8/7/17 9:39 AM; Ar40 = P @ 8/7/17 9:40 AM; Ar39 = P @ 8/7/17 9:40 AM; Ar38 = L @ 8/7/17 9:40 AM; Ar37 = L @ 8/7/17 9:40 AM; Ar36 = P @ 8/7/17 9:40 AM; Ar41 bk val,er = @ 8/7/17 2:49 PM; Average background @ 8/7/17 2:49 PM; Ar40 bk val,er = @ 8/7/17 2:49 PM; Average background @ 8…	N:9	LPPLLPAAAAAA	1	Pychron Script	1	Fusions CO2	5	0	0	0	0	30	30	83			0
	15	5	6.83002	0.0099696	0.2418	5.62333	51.176	98.9642	33.9831	0.0095314	0.0017491								65735-15	K17-BS-1	37	2017-07-07	14.7667	3582284000	Heizler, M	Sanidine	9	IR1009		129.138.12.160	7.875	Ar40 = L @ 8/7/17 9:39 AM; Ar39 = L @ 8/7/17 9:39 AM; Ar38 = L @ 8/7/17 9:39 AM; Ar37 = L @ 8/7/17 9:39 AM; Ar36 = L @ 8/7/17 9:39 AM; Ar40 = P @ 8/7/17 9:40 AM; Ar39 = P @ 8/7/17 9:40 AM; Ar38 = L @ 8/7/17 9:40 AM; Ar37 = L @ 8/7/17 9:40 AM; Ar36 = P @ 8/7/17 9:40 AM; Ar41 bk val,er = @ 8/7/17 2:49 PM; Average background @ 8/7/17 2:49 PM; Ar40 bk val,er = @ 8/7/17 2:49 PM; Average background @ 8…	N:9	LPPLLPAAAAAA	1	Pychron Script	1	Fusions CO2	5	0	0	0	0	30	30	97			0
	31	5	6.99542	0.0163931	0.7833	3.6135	31.1231	96.706	34.0127	0.0150576	0.0017491								65735-31	K17-BS-1	37	2017-07-07	19.0333	3582299000	Heizler, M	Sanidine	9	IR1009		129.138.12.160	7.875	Ar40 = P @ 8/7/17 9:41 AM; Ar39 = P @ 8/7/17 9:41 AM; Ar38 = L @ 8/7/17 9:41 AM; Ar37 = L @ 8/7/17 9:41 AM; Ar36 = P @ 8/7/17 9:41 AM; Ar41 bk val,er = @ 8/7/17 2:49 PM; Average background @ 8/7/17 2:49 PM; Ar40 bk val,er = @ 8/7/17 2:49 PM; Average background @ 8/7/17 2:49 PM; Ar39 bk val,er = @ 8/7/17 2:49 PM; Average background @ 8/7/17 2:49 PM; Ar38 bk val,er = @ 8/7/17 2:49 PM; Average backg…	N:9	LPPLLPAAAAAA	1	Pychron Script	1	Fusions CO2	5	0	0	0	0	30	30	113			0
	52	5	6.91819	0.0074801	0.4048	4.39075	68.2082	98.2775	34.1816	0.0117265	0.0017491								65735-52	K17-BS-1	37	2017-07-08	1	3582320000	Heizler, M	Sanidine	9	IR1009		129.138.12.160	7.875	Ar40 = P @ 8/7/17 9:41 AM; Ar39 = P @ 8/7/17 9:41 AM; Ar38 = L @ 8/7/17 9:41 AM; Ar37 = L @ 8/7/17 9:41 AM; Ar36 = P @ 8/7/17 9:41 AM; Ar41 bk val,er = @ 8/7/17 2:49 PM; Average background @ 8/7/17 2:49 PM; Ar40 bk val,er = @ 8/7/17 2:49 PM; Average background @ 8/7/17 2:49 PM; Ar39 bk val,er = @ 8/7/17 2:49 PM; Average background @ 8/7/17 2:49 PM; Ar38 bk val,er = @ 8/7/17 2:49 PM; Average backg…	N:9	LPPLLPAAAAAA	1	Pychron Script	1	Fusions CO2	5	0	0	0	0	30	30	134			0
	26	5	6.85596	0.0104446	0.177	6.74061	48.8486	99.2483	34.2082	0.0078973	0.0017491								65735-26	K17-BS-1	37	2017-07-07	17.7667	3582294000	Heizler, M	Sanidine	9	IR1009		129.138.12.160	7.875	Ar40 = L @ 8/7/17 9:39 AM; Ar39 = L @ 8/7/17 9:39 AM; Ar38 = L @ 8/7/17 9:39 AM; Ar37 = L @ 8/7/17 9:39 AM; Ar36 = L @ 8/7/17 9:39 AM; Ar40 = P @ 8/7/17 9:41 AM; Ar39 = P @ 8/7/17 9:41 AM; Ar38 = L @ 8/7/17 9:41 AM; Ar37 = L @ 8/7/17 9:41 AM; Ar36 = P @ 8/7/17 9:41 AM; Ar41 bk val,er = @ 8/7/17 2:49 PM; Average background @ 8/7/17 2:49 PM; Ar40 bk val,er = @ 8/7/17 2:49 PM; Average background @ 8…	N:9	LPPLLPAAAAAA	1	Pychron Script	1	Fusions CO2	5	0	0	0	0	30	30	108			0
	37	5	7.88382	0.0073977	3.5172	0.409402	68.9679	86.8097	34.4105	0.111027	0.0017491								65735-37	K17-BS-1	37	2017-07-07	20.5167	3582304000	Heizler, M	Sanidine	9	IR1009		129.138.12.160	7.875	Ar40 = P @ 8/7/17 9:41 AM; Ar39 = P @ 8/7/17 9:41 AM; Ar38 = L @ 8/7/17 9:41 AM; Ar37 = L @ 8/7/17 9:41 AM; Ar36 = P @ 8/7/17 9:41 AM; Ar41 bk val,er = @ 8/7/17 2:49 PM; Average background @ 8/7/17 2:49 PM; Ar40 bk val,er = @ 8/7/17 2:49 PM; Average background @ 8/7/17 2:49 PM; Ar39 bk val,er = @ 8/7/17 2:49 PM; Average background @ 8/7/17 2:49 PM; Ar38 bk val,er = @ 8/7/17 2:49 PM; Average backg…	N:9	LPPLLPAAAAAA	1	Pychron Script	1	Fusions CO2	5	0	0	0	0	30	30	119			0
	51	5	7.14344	0.0165998	0.7804	3.20709	30.7356	96.7868	34.7553	0.0167893	0.0017491								65735-51	K17-BS-1	37	2017-07-08	0.583333	3582319000	Heizler, M	Sanidine	9	IR1009		129.138.12.160	7.875	Ar40 = P @ 8/7/17 9:41 AM; Ar39 = P @ 8/7/17 9:41 AM; Ar38 = L @ 8/7/17 9:41 AM; Ar37 = L @ 8/7/17 9:41 AM; Ar36 = P @ 8/7/17 9:41 AM; Ar41 bk val,er = @ 8/7/17 2:49 PM; Average background @ 8/7/17 2:49 PM; Ar40 bk val,er = @ 8/7/17 2:49 PM; Average background @ 8/7/17 2:49 PM; Ar39 bk val,er = @ 8/7/17 2:49 PM; Average background @ 8/7/17 2:49 PM; Ar38 bk val,er = @ 8/7/17 2:49 PM; Average backg…	N:9	LPPLLPAAAAAA	1	Pychron Script	1	Fusions CO2	5	0	0	0	0	30	30	133			0
	12	5	7.09288	0.0061264	0.5603	3.95407	83.2796	97.6696	34.8229	0.0130815	0.0017491								65735-12	K17-BS-1	37	2017-07-07	11.6667	3582272000	Heizler, M	Sanidine	9	IR1009		129.138.12.160	7.875	Ar40 = L @ 8/7/17 9:39 AM; Ar39 = L @ 8/7/17 9:39 AM; Ar38 = L @ 8/7/17 9:39 AM; Ar37 = L @ 8/7/17 9:39 AM; Ar36 = L @ 8/7/17 9:39 AM; Ar40 = P @ 8/7/17 9:40 AM; Ar39 = P @ 8/7/17 9:40 AM; Ar38 = L @ 8/7/17 9:40 AM; Ar37 = L @ 8/7/17 9:40 AM; Ar36 = P @ 8/7/17 9:40 AM; Ar41 bk val,er = @ 8/7/17 2:49 PM; Average background @ 8/7/17 2:49 PM; Ar40 bk val,er = @ 8/7/17 2:49 PM; Average background @ 8…	N:9	LPPLLPAAAAAA	1	Pychron Script	1	Fusions CO2	5	0	0	0	0	30	30	93			0
	33	5	7.04086	0.0071934	0.3613	3.42356	70.9267	98.4898	34.8571	0.0141486	0.0017491								65735-33	K17-BS-1	37	2017-07-07	19.6667	3582301000	Heizler, M	Sanidine	9	IR1009		129.138.12.160	7.875	Ar40 = P @ 8/7/17 9:41 AM; Ar39 = P @ 8/7/17 9:41 AM; Ar38 = L @ 8/7/17 9:41 AM; Ar37 = L @ 8/7/17 9:41 AM; Ar36 = P @ 8/7/17 9:41 AM; Ar41 bk val,er = @ 8/7/17 2:49 PM; Average background @ 8/7/17 2:49 PM; Ar40 bk val,er = @ 8/7/17 2:49 PM; Average background @ 8/7/17 2:49 PM; Ar39 bk val,er = @ 8/7/17 2:49 PM; Average background @ 8/7/17 2:49 PM; Ar38 bk val,er = @ 8/7/17 2:49 PM; Average backg…	N:9	LPPLLPAAAAAA	1	Pychron Script	1	Fusions CO2	5	0	0	0	0	30	30	115			0
	67	5	7.04922	0.0054978	0.3812	7.41203	92.8015	98.4063	34.8688	0.0080692	0.0017491								65735-67	K17-BS-1	37	2017-07-08	5.06667	3582335000	Heizler, M	Sanidine	9	IR1009		129.138.12.160	7.875	Ar40 = P @ 8/7/17 9:41 AM; Ar39 = P @ 8/7/17 9:41 AM; Ar38 = L @ 8/7/17 9:41 AM; Ar37 = L @ 8/7/17 9:41 AM; Ar36 = P @ 8/7/17 9:41 AM; Ar41 bk val,er = @ 8/7/17 2:49 PM; Average background @ 8/7/17 2:49 PM; Ar40 bk val,er = @ 8/7/17 2:49 PM; Average background @ 8/7/17 2:49 PM; Ar39 bk val,er = @ 8/7/17 2:49 PM; Average background @ 8/7/17 2:49 PM; Ar38 bk val,er = @ 8/7/17 2:49 PM; Average backg…	N:9	LPPLLPAAAAAA	1	Pychron Script	1	Fusions CO2	5	0	0	0	0	30	30	149			0
	39	5	7.56707	0.0016348	1.9125	0.535386	312.09	92.5246	35.1929	0.0817878	0.0017491								65735-39	K17-BS-1	37	2017-07-07	21.8167	3582309000	Heizler, M	Sanidine	9	IR1009		129.138.12.160	7.875	Ar40 = P @ 8/7/17 9:41 AM; Ar39 = P @ 8/7/17 9:41 AM; Ar38 = L @ 8/7/17 9:41 AM; Ar37 = L @ 8/7/17 9:41 AM; Ar36 = P @ 8/7/17 9:41 AM; Ar41 bk val,er = @ 8/7/17 2:49 PM; Average background @ 8/7/17 2:49 PM; Ar40 bk val,er = @ 8/7/17 2:49 PM; Average background @ 8/7/17 2:49 PM; Ar39 bk val,er = @ 8/7/17 2:49 PM; Average background @ 8/7/17 2:49 PM; Ar38 bk val,er = @ 8/7/17 2:49 PM; Average backg…	N:9	LPPLLPAAAAAA	1	Pychron Script	1	Fusions CO2	5	0	0	0	0	30	30	121			0
	47	5	7.20953	0.0082024	0.6424	3.38215	62.2018	97.3729	35.2843	0.0149991	0.0017491								65735-47	K17-BS-1	37	2017-07-07	23.5167	3582315000	Heizler, M	Sanidine	9	IR1009		129.138.12.160	7.875	Ar40 = P @ 8/7/17 9:41 AM; Ar39 = P @ 8/7/17 9:41 AM; Ar38 = L @ 8/7/17 9:41 AM; Ar37 = L @ 8/7/17 9:41 AM; Ar36 = P @ 8/7/17 9:41 AM; Ar41 bk val,er = @ 8/7/17 2:49 PM; Average background @ 8/7/17 2:49 PM; Ar40 bk val,er = @ 8/7/17 2:49 PM; Average background @ 8/7/17 2:49 PM; Ar39 bk val,er = @ 8/7/17 2:49 PM; Average background @ 8/7/17 2:49 PM; Ar38 bk val,er = @ 8/7/17 2:49 PM; Average backg…	N:9	LPPLLPAAAAAA	1	Pychron Script	1	Fusions CO2	5	0	0	0	0	30	30	129			0
	06	5	7.19972	0.0075065	0.6014	7.78963	67.9683	97.5371	35.2956	0.0086346	0.0017491								65735-06	K17-BS-1	37	2017-07-07	9.96667	3582266000	Heizler, M	Sanidine	9	IR1009		129.138.12.160	7.875	Ar40 = L @ 8/7/17 9:39 AM; Ar39 = L @ 8/7/17 9:39 AM; Ar38 = L @ 8/7/17 9:39 AM; Ar37 = L @ 8/7/17 9:39 AM; Ar36 = L @ 8/7/17 9:39 AM; Ar40 = P @ 8/7/17 9:40 AM; Ar39 = P @ 8/7/17 9:40 AM; Ar38 = L @ 8/7/17 9:40 AM; Ar37 = L @ 8/7/17 9:40 AM; Ar36 = P @ 8/7/17 9:40 AM; Ar41 bk val,er = @ 8/7/17 2:49 PM; Average background @ 8/7/17 2:49 PM; Ar40 bk val,er = @ 8/7/17 2:49 PM; Average background @ 8…	N:9	LPPLLPAAAAAA	1	Pychron Script	1	Fusions CO2	5	0	0	0	0	30	30	87			0
	40	5	7.09313	0.004631	0.229	5.87871	110.171	99.05	35.3115	0.0088546	0.0017491								65735-40	K17-BS-1	37	2017-07-07	22.0333	3582310000	Heizler, M	Sanidine	9	IR1009		129.138.12.160	7.875	Ar40 = P @ 8/7/17 9:41 AM; Ar39 = P @ 8/7/17 9:41 AM; Ar38 = L @ 8/7/17 9:41 AM; Ar37 = L @ 8/7/17 9:41 AM; Ar36 = P @ 8/7/17 9:41 AM; Ar41 bk val,er = @ 8/7/17 2:49 PM; Average background @ 8/7/17 2:49 PM; Ar40 bk val,er = @ 8/7/17 2:49 PM; Average background @ 8/7/17 2:49 PM; Ar39 bk val,er = @ 8/7/17 2:49 PM; Average background @ 8/7/17 2:49 PM; Ar38 bk val,er = @ 8/7/17 2:49 PM; Average backg…	N:9	LPPLLPAAAAAA	1	Pychron Script	1	Fusions CO2	5	0	0	0	0	30	30	122			0
	71	5	7.24216	0.0079814	0.7315	3.97355	63.9241	97.0204	35.3156	0.0141349	0.0017491								65735-71	K17-BS-1	37	2017-07-08	6.33333	3582340000	Heizler, M	Sanidine	9	IR1009		129.138.12.160	7.875	Ar40 = P @ 8/7/17 9:41 AM; Ar39 = P @ 8/7/17 9:41 AM; Ar38 = L @ 8/7/17 9:41 AM; Ar37 = L @ 8/7/17 9:41 AM; Ar36 = P @ 8/7/17 9:41 AM; Ar41 bk val,er = @ 8/7/17 2:49 PM; Average background @ 8/7/17 2:49 PM; Ar40 bk val,er = @ 8/7/17 2:49 PM; Average background @ 8/7/17 2:49 PM; Ar39 bk val,er = @ 8/7/17 2:49 PM; Average background @ 8/7/17 2:49 PM; Ar38 bk val,er = @ 8/7/17 2:49 PM; Average backg…	N:9	LPPLLPAAAAAA	1	Pychron Script	1	Fusions CO2	5	0	0	0	0	30	30	153			0
	57	5	7.12771	0.0051663	0.3361	4.7039	98.7562	98.6107	35.3263	0.0112529	0.0017491								65735-57	K17-BS-1	37	2017-07-08	2.28333	3582325000	Heizler, M	Sanidine	9	IR1009		129.138.12.160	7.875	Ar40 = P @ 8/7/17 9:41 AM; Ar39 = P @ 8/7/17 9:41 AM; Ar38 = L @ 8/7/17 9:41 AM; Ar37 = L @ 8/7/17 9:41 AM; Ar36 = P @ 8/7/17 9:41 AM; Ar41 bk val,er = @ 8/7/17 2:49 PM; Average background @ 8/7/17 2:49 PM; Ar40 bk val,er = @ 8/7/17 2:49 PM; Average background @ 8/7/17 2:49 PM; Ar39 bk val,er = @ 8/7/17 2:49 PM; Average background @ 8/7/17 2:49 PM; Ar38 bk val,er = @ 8/7/17 2:49 PM; Average backg…	N:9	LPPLLPAAAAAA	1	Pychron Script	1	Fusions CO2	5	0	0	0	0	30	30	139			0
	50	5	7.22076	0.007137	0.5669	2.23677	71.4872	97.6853	35.4511	0.0212027	0.0017491								65735-50	K17-BS-1	37	2017-07-08	0.166667	3582317000	Heizler, M	Sanidine	9	IR1009		129.138.12.160	7.875	Ar40 = P @ 8/7/17 9:41 AM; Ar39 = P @ 8/7/17 9:41 AM; Ar38 = L @ 8/7/17 9:41 AM; Ar37 = L @ 8/7/17 9:41 AM; Ar36 = P @ 8/7/17 9:41 AM; Ar41 bk val,er = @ 8/7/17 2:49 PM; Average background @ 8/7/17 2:49 PM; Ar40 bk val,er = @ 8/7/17 2:49 PM; Average background @ 8/7/17 2:49 PM; Ar39 bk val,er = @ 8/7/17 2:49 PM; Average background @ 8/7/17 2:49 PM; Ar38 bk val,er = @ 8/7/17 2:49 PM; Average backg…	N:9	LPPLLPAAAAAA	1	Pychron Script	1	Fusions CO2	5	0	0	0	0	30	30	132			0
	41	5	7.18431	0.0088724	0.4299	3.67836	57.5046	98.2397	35.4719	0.0134676	0.0017491								65735-41	K17-BS-1	37	2017-07-07	22.25	3582311000	Heizler, M	Sanidine	9	IR1009		129.138.12.160	7.875	Ar40 = P @ 8/7/17 9:41 AM; Ar39 = P @ 8/7/17 9:41 AM; Ar38 = L @ 8/7/17 9:41 AM; Ar37 = L @ 8/7/17 9:41 AM; Ar36 = P @ 8/7/17 9:41 AM; Ar41 bk val,er = @ 8/7/17 2:49 PM; Average background @ 8/7/17 2:49 PM; Ar40 bk val,er = @ 8/7/17 2:49 PM; Average background @ 8/7/17 2:49 PM; Ar39 bk val,er = @ 8/7/17 2:49 PM; Average background @ 8/7/17 2:49 PM; Ar38 bk val,er = @ 8/7/17 2:49 PM; Average backg…	N:9	LPPLLPAAAAAA	1	Pychron Script	1	Fusions CO2	5	0	0	0	0	30	30	123			0
	72	5	7.34091	0.0079948	0.8831	3.00821	63.817	96.4498	35.5846	0.017919	0.0017491								65735-72	K17-BS-1	37	2017-07-08	6.55	3582340000	Heizler, M	Sanidine	9	IR1009		129.138.12.160	7.875	Ar40 = P @ 8/7/17 9:41 AM; Ar39 = P @ 8/7/17 9:41 AM; Ar38 = L @ 8/7/17 9:41 AM; Ar37 = L @ 8/7/17 9:41 AM; Ar36 = P @ 8/7/17 9:41 AM; Ar41 bk val,er = @ 8/7/17 2:49 PM; Average background @ 8/7/17 2:49 PM; Ar40 bk val,er = @ 8/7/17 2:49 PM; Average background @ 8/7/17 2:49 PM; Ar39 bk val,er = @ 8/7/17 2:49 PM; Average background @ 8/7/17 2:49 PM; Ar38 bk val,er = @ 8/7/17 2:49 PM; Average backg…	N:9	LPPLLPAAAAAA	1	Pychron Script	1	Fusions CO2	5	0	0	0	0	30	30	154			0
	59	5	7.13174	0.0108218	0.1229	3.51292	47.1459	99.5023	35.6628	0.0131192	0.0017491								65735-59	K17-BS-1	37	2017-07-08	3.16667	3582328000	Heizler, M	Sanidine	9	IR1009		129.138.12.160	7.875	Ar40 = P @ 8/7/17 9:41 AM; Ar39 = P @ 8/7/17 9:41 AM; Ar38 = L @ 8/7/17 9:41 AM; Ar37 = L @ 8/7/17 9:41 AM; Ar36 = P @ 8/7/17 9:41 AM; Ar41 bk val,er = @ 8/7/17 2:49 PM; Average background @ 8/7/17 2:49 PM; Ar40 bk val,er = @ 8/7/17 2:49 PM; Average background @ 8/7/17 2:49 PM; Ar39 bk val,er = @ 8/7/17 2:49 PM; Average background @ 8/7/17 2:49 PM; Ar38 bk val,er = @ 8/7/17 2:49 PM; Average backg…	N:9	LPPLLPAAAAAA	1	Pychron Script	1	Fusions CO2	5	0	0	0	0	30	30	141			0
	10	5	7.42306	0.0045935	0.348	8.9166	111.071	98.618	36.78	0.0073707	0.0017491								65735-10	K17-BS-1	37	2017-07-07	11.0333	3582270000	Heizler, M	Sanidine	9	IR1009		129.138.12.160	7.875	Ar40 = L @ 8/7/17 9:39 AM; Ar39 = L @ 8/7/17 9:39 AM; Ar38 = L @ 8/7/17 9:39 AM; Ar37 = L @ 8/7/17 9:39 AM; Ar36 = L @ 8/7/17 9:39 AM; Ar40 = P @ 8/7/17 9:40 AM; Ar39 = P @ 8/7/17 9:40 AM; Ar38 = L @ 8/7/17 9:40 AM; Ar37 = L @ 8/7/17 9:40 AM; Ar36 = P @ 8/7/17 9:40 AM; Ar41 bk val,er = @ 8/7/17 2:49 PM; Average background @ 8/7/17 2:49 PM; Ar40 bk val,er = @ 8/7/17 2:49 PM; Average background @ 8…	N:9	LPPLLPAAAAAA	1	Pychron Script	1	Fusions CO2	5	0	0	0	0	30	30	91			0
	09	5	7.52167	0.0197568	0.358	5.53316	25.8242	98.6133	37.2629	0.0097839	0.0017491								65735-09	K17-BS-1	37	2017-07-07	10.6	3582269000	Heizler, M	Sanidine	9	IR1009		129.138.12.160	7.875	Ar40 = L @ 8/7/17 9:39 AM; Ar39 = L @ 8/7/17 9:39 AM; Ar38 = L @ 8/7/17 9:39 AM; Ar37 = L @ 8/7/17 9:39 AM; Ar36 = L @ 8/7/17 9:39 AM; Ar40 = P @ 8/7/17 9:40 AM; Ar39 = P @ 8/7/17 9:40 AM; Ar38 = L @ 8/7/17 9:40 AM; Ar37 = L @ 8/7/17 9:40 AM; Ar36 = P @ 8/7/17 9:40 AM; Ar41 bk val,er = @ 8/7/17 2:49 PM; Average background @ 8/7/17 2:49 PM; Ar40 bk val,er = @ 8/7/17 2:49 PM; Average background @ 8…	N:9	LPPLLPAAAAAA	1	Pychron Script	1	Fusions CO2	5	0	0	0	0	30	30	90			0
	36	5	7.9304	0.0102233	1.3319	3.65783	49.906	95.0419	37.8608	0.01668	0.0017491								65735-36	K17-BS-1	37	2017-07-07	20.3	3582304000	Heizler, M	Sanidine	9	IR1009		129.138.12.160	7.875	Ar40 = P @ 8/7/17 9:41 AM; Ar39 = P @ 8/7/17 9:41 AM; Ar38 = L @ 8/7/17 9:41 AM; Ar37 = L @ 8/7/17 9:41 AM; Ar36 = P @ 8/7/17 9:41 AM; Ar41 bk val,er = @ 8/7/17 2:49 PM; Average background @ 8/7/17 2:49 PM; Ar40 bk val,er = @ 8/7/17 2:49 PM; Average background @ 8/7/17 2:49 PM; Ar39 bk val,er = @ 8/7/17 2:49 PM; Average background @ 8/7/17 2:49 PM; Ar38 bk val,er = @ 8/7/17 2:49 PM; Average backg…	N:9	LPPLLPAAAAAA	1	Pychron Script	1	Fusions CO2	5	0	0	0	0	30	30	118			0
	21	5	7.79662	0.0105643	0.4427	0.421545	48.2951	98.3312	38.5028	0.0957439	0.0017491								65735-21	K17-BS-1	37	2017-07-07	16.5	3582290000	Heizler, M	Sanidine	9	IR1009		129.138.12.160	7.875	Ar40 = L @ 8/7/17 9:39 AM; Ar39 = L @ 8/7/17 9:39 AM; Ar38 = L @ 8/7/17 9:39 AM; Ar37 = L @ 8/7/17 9:39 AM; Ar36 = L @ 8/7/17 9:39 AM; Ar40 = P @ 8/7/17 9:40 AM; Ar39 = P @ 8/7/17 9:40 AM; Ar38 = L @ 8/7/17 9:40 AM; Ar37 = L @ 8/7/17 9:40 AM; Ar36 = P @ 8/7/17 9:40 AM; Ar41 bk val,er = @ 8/7/17 2:49 PM; Average background @ 8/7/17 2:49 PM; Ar40 bk val,er = @ 8/7/17 2:49 PM; Average background @ 8…	N:9	LPPLLPAAAAAA	1	Pychron Script	1	Fusions CO2	5	0	0	0	0	30	30	103			0
	65	5	8.49021	0.0046668	0.3127	4.71668	109.326	98.915	42.1386	0.0116807	0.0017491								65735-65	K17-BS-1	37	2017-07-08	4.65	3582334000	Heizler, M	Sanidine	9	IR1009		129.138.12.160	7.875	Ar40 = P @ 8/7/17 9:41 AM; Ar39 = P @ 8/7/17 9:41 AM; Ar38 = L @ 8/7/17 9:41 AM; Ar37 = L @ 8/7/17 9:41 AM; Ar36 = P @ 8/7/17 9:41 AM; Ar41 bk val,er = @ 8/7/17 2:49 PM; Average background @ 8/7/17 2:49 PM; Ar40 bk val,er = @ 8/7/17 2:49 PM; Average background @ 8/7/17 2:49 PM; Ar39 bk val,er = @ 8/7/17 2:49 PM; Average background @ 8/7/17 2:49 PM; Ar38 bk val,er = @ 8/7/17 2:49 PM; Average backg…	N:9	LPPLLPAAAAAA	1	Pychron Script	1	Fusions CO2	5	0	0	0	0	30	30	147			0
	44	5	8.51177	0.0042679	0.067	4.51961	119.545	99.7711	42.6059	0.0112582	0.0017491								65735-44	K17-BS-1	37	2017-07-07	22.8833	3582313000	Heizler, M	Sanidine	9	IR1009		129.138.12.160	7.875	Ar40 = P @ 8/7/17 9:41 AM; Ar39 = P @ 8/7/17 9:41 AM; Ar38 = L @ 8/7/17 9:41 AM; Ar37 = L @ 8/7/17 9:41 AM; Ar36 = P @ 8/7/17 9:41 AM; Ar41 bk val,er = @ 8/7/17 2:49 PM; Average background @ 8/7/17 2:49 PM; Ar40 bk val,er = @ 8/7/17 2:49 PM; Average background @ 8/7/17 2:49 PM; Ar39 bk val,er = @ 8/7/17 2:49 PM; Average background @ 8/7/17 2:49 PM; Ar38 bk val,er = @ 8/7/17 2:49 PM; Average backg…	N:9	LPPLLPAAAAAA	1	Pychron Script	1	Fusions CO2	5	0	0	0	0	30	30	126			0
	55	5	8.84048	0.002967	0.1187	7.59817	171.96	99.6055	44.1606	0.0079137	0.0017491								65735-55	K17-BS-1	37	2017-07-08	1.85	3582323000	Heizler, M	Sanidine	9	IR1009		129.138.12.160	7.875	Ar40 = P @ 8/7/17 9:41 AM; Ar39 = P @ 8/7/17 9:41 AM; Ar38 = L @ 8/7/17 9:41 AM; Ar37 = L @ 8/7/17 9:41 AM; Ar36 = P @ 8/7/17 9:41 AM; Ar41 bk val,er = @ 8/7/17 2:49 PM; Average background @ 8/7/17 2:49 PM; Ar40 bk val,er = @ 8/7/17 2:49 PM; Average background @ 8/7/17 2:49 PM; Ar39 bk val,er = @ 8/7/17 2:49 PM; Average background @ 8/7/17 2:49 PM; Ar38 bk val,er = @ 8/7/17 2:49 PM; Average backg…	N:9	LPPLLPAAAAAA	1	Pychron Script	1	Fusions CO2	5	0	0	0	0	30	30	137			0
	03	5	9.17712	0.0025311	0.6739	0.897731	201.574	97.8306	45.0164	0.0487307	0.0017491								65735-03	K17-BS-1	37	2017-07-07	9.11667	3582263000	Heizler, M	Sanidine	9	IR1009		129.138.12.160	7.875	Ar40 = L @ 8/7/17 9:39 AM; Ar39 = L @ 8/7/17 9:39 AM; Ar38 = L @ 8/7/17 9:39 AM; Ar37 = L @ 8/7/17 9:39 AM; Ar36 = L @ 8/7/17 9:39 AM; Ar40 = P @ 8/7/17 9:40 AM; Ar39 = P @ 8/7/17 9:40 AM; Ar38 = L @ 8/7/17 9:40 AM; Ar37 = L @ 8/7/17 9:40 AM; Ar36 = P @ 8/7/17 9:40 AM; Ar41 bk val,er = @ 8/7/17 2:49 PM; Average background @ 8/7/17 2:49 PM; Ar40 bk val,er = @ 8/7/17 2:49 PM; Average background @ 8…	N:9	LPPLLPAAAAAA	1	Pychron Script	1	Fusions CO2	5	0	0	0	0	30	30	84			0
	16	5	9.82212	0.013145	0.241	2.14828	38.8135	99.2852	48.8488	0.0226936	0.0017491								65735-16	K17-BS-1	37	2017-07-07	14.9667	3582284000	Heizler, M	Sanidine	9	IR1009		129.138.12.160	7.875	Ar40 = L @ 8/7/17 9:39 AM; Ar39 = L @ 8/7/17 9:39 AM; Ar38 = L @ 8/7/17 9:39 AM; Ar37 = L @ 8/7/17 9:39 AM; Ar36 = L @ 8/7/17 9:39 AM; Ar40 = P @ 8/7/17 9:40 AM; Ar39 = P @ 8/7/17 9:40 AM; Ar38 = L @ 8/7/17 9:40 AM; Ar37 = L @ 8/7/17 9:40 AM; Ar36 = P @ 8/7/17 9:40 AM; Ar41 bk val,er = @ 8/7/17 2:49 PM; Average background @ 8/7/17 2:49 PM; Ar40 bk val,er = @ 8/7/17 2:49 PM; Average background @ 8…	N:9	LPPLLPAAAAAA	1	Pychron Script	1	Fusions CO2	5	0	0	0	0	30	30	98			0
	70	5	11.8794	0.0082312	0.0521	3.49805	61.9842	99.876	59.2709	0.0166322	0.0017491								65735-70	K17-BS-1	37	2017-07-08	5.91667	3582338000	Heizler, M	Sanidine	9	IR1009		129.138.12.160	7.875	Ar40 = P @ 8/7/17 9:41 AM; Ar39 = P @ 8/7/17 9:41 AM; Ar38 = L @ 8/7/17 9:41 AM; Ar37 = L @ 8/7/17 9:41 AM; Ar36 = P @ 8/7/17 9:41 AM; Ar41 bk val,er = @ 8/7/17 2:49 PM; Average background @ 8/7/17 2:49 PM; Ar40 bk val,er = @ 8/7/17 2:49 PM; Average background @ 8/7/17 2:49 PM; Ar39 bk val,er = @ 8/7/17 2:49 PM; Average background @ 8/7/17 2:49 PM; Ar38 bk val,er = @ 8/7/17 2:49 PM; Average backg…	N:9	LPPLLPAAAAAA	1	Pychron Script	1	Fusions CO2	5	0	0	0	0	30	30	152			0
	53	5	15.0876	0.004071	0.117	9.63729	125.326	99.7728	74.89	0.0088416	0.0017491								65735-53	K17-BS-1	37	2017-07-08	1.21667	3582321000	Heizler, M	Sanidine	9	IR1009		129.138.12.160	7.875	Ar40 = P @ 8/7/17 9:41 AM; Ar39 = P @ 8/7/17 9:41 AM; Ar38 = L @ 8/7/17 9:41 AM; Ar37 = L @ 8/7/17 9:41 AM; Ar36 = P @ 8/7/17 9:41 AM; Ar41 bk val,er = @ 8/7/17 2:49 PM; Average background @ 8/7/17 2:49 PM; Ar40 bk val,er = @ 8/7/17 2:49 PM; Average background @ 8/7/17 2:49 PM; Ar39 bk val,er = @ 8/7/17 2:49 PM; Average background @ 8/7/17 2:49 PM; Ar38 bk val,er = @ 8/7/17 2:49 PM; Average backg…	N:9	LPPLLPAAAAAA	1	Pychron Script	1	Fusions CO2	5	0	0	0	0	30	30	135			0
	24	5	24.8941	0.0078076	0.2487	5.55245	65.3471	99.7073	121.923	0.0195221	0.0017491								65735-24	K17-BS-1	37	2017-07-07	17.3333	3582293000	Heizler, M	Sanidine	9	IR1009		129.138.12.160	7.875	Ar40 = L @ 8/7/17 9:39 AM; Ar39 = L @ 8/7/17 9:39 AM; Ar38 = L @ 8/7/17 9:39 AM; Ar37 = L @ 8/7/17 9:39 AM; Ar36 = L @ 8/7/17 9:39 AM; Ar40 = P @ 8/7/17 9:41 AM; Ar39 = P @ 8/7/17 9:41 AM; Ar38 = L @ 8/7/17 9:41 AM; Ar37 = L @ 8/7/17 9:41 AM; Ar36 = P @ 8/7/17 9:41 AM; Ar41 bk val,er = @ 8/7/17 2:49 PM; Average background @ 8/7/17 2:49 PM; Ar40 bk val,er = @ 8/7/17 2:49 PM; Average background @ 8…	N:9	LPPLLPAAAAAA	1	Pychron Script	1	Fusions CO2	5	0	0	0	0	30	30	106			0
	22	5	44.9969	0.0065926	0.0335	3.34249	77.3904	99.9792	215.362	0.0443992	0.0017491								65735-22	K17-BS-1	37	2017-07-07	16.7	3582291000	Heizler, M	Sanidine	9	IR1009		129.138.12.160	7.875	Ar40 = L @ 8/7/17 9:39 AM; Ar39 = L @ 8/7/17 9:39 AM; Ar38 = L @ 8/7/17 9:39 AM; Ar37 = L @ 8/7/17 9:39 AM; Ar36 = L @ 8/7/17 9:39 AM; Ar40 = P @ 8/7/17 9:40 AM; Ar39 = P @ 8/7/17 9:40 AM; Ar38 = L @ 8/7/17 9:40 AM; Ar37 = L @ 8/7/17 9:40 AM; Ar36 = P @ 8/7/17 9:40 AM; Ar41 bk val,er = @ 8/7/17 2:49 PM; Average background @ 8/7/17 2:49 PM; Ar40 bk val,er = @ 8/7/17 2:49 PM; Average background @ 8…	N:9	LPPLLPAAAAAA	1	Pychron Script	1	Fusions CO2	5	0	0	0	0	30	30	104			0
	25	5	82.6979	0.0060969	0.9514	3.09039	83.6825	99.6606	377.078	0.0793014	0.0017491								65735-25	K17-BS-1	37	2017-07-07	17.55	3582294000	Heizler, M	Sanidine	9	IR1009		129.138.12.160	7.875	Ar40 = L @ 8/7/17 9:39 AM; Ar39 = L @ 8/7/17 9:39 AM; Ar38 = L @ 8/7/17 9:39 AM; Ar37 = L @ 8/7/17 9:39 AM; Ar36 = L @ 8/7/17 9:39 AM; Ar40 = P @ 8/7/17 9:41 AM; Ar39 = P @ 8/7/17 9:41 AM; Ar38 = L @ 8/7/17 9:41 AM; Ar37 = L @ 8/7/17 9:41 AM; Ar36 = P @ 8/7/17 9:41 AM; Ar41 bk val,er = @ 8/7/17 2:49 PM; Average background @ 8/7/17 2:49 PM; Ar40 bk val,er = @ 8/7/17 2:49 PM; Average background @ 8…	N:9	LPPLLPAAAAAA	1	Pychron Script	1	Fusions CO2	5	0	0	0	0	30	30	107			0
				n=72
	K17-BS-1, Sanidine, J=0.0027741±0.02%, IC=0.9989985±0.0017491, NM-290N, Lab#=65736, Argus VI
	54	4.5	0.927228	0.0065432	0.0343	2.90933	77.9747	98.9539	4.60919	0.0073467	0.0018433								65736-54	K17-BS-1	37	2017-07-12	23.35	3582746000	Heizler, M	Sanidine	11	IR1009		129.138.12.160	7.875	Ar40 = L @ 8/7/17 9:44 AM; Ar39 = L @ 8/7/17 9:44 AM; Ar38 = L @ 8/7/17 9:44 AM; Ar37 = L @ 8/7/17 9:44 AM; Ar36 = L @ 8/7/17 9:44 AM; Ar40 = L @ 8/7/17 4:11 PM; Ar39 = L @ 8/7/17 4:11 PM; Ar38 = L @ 8/7/17 4:11 PM; Ar37 = L @ 8/7/17 4:11 PM; Ar36 = L @ 8/7/17 4:11 PM; Ar41 bk val,er = @ 8/7/17 4:17 PM; Average background @ 8/7/17 4:17 PM; Ar40 bk val,er = @ 8/7/17 4:17 PM; Average background @ 8…	N:11	ALLLLLAAAAAA	1	Pychron Script	1	Fusions CO2	4.5	0	0	0	0	30	30	74			0
	13	5	0.935672	0.0091666	0.0439	4.02448	55.659	98.6816	4.63873	0.00929	0.0017491								65736-13	K17-BS-1	37	2017-07-08	10.4	3582354000	Heizler, M	Sanidine	11	IR1009		129.138.12.160	7.875	Ar40 = P @ 8/7/17 9:42 AM; Ar39 = P @ 8/7/17 9:42 AM; Ar38 = L @ 8/7/17 9:42 AM; Ar37 = L @ 8/7/17 9:42 AM; Ar36 = P @ 8/7/17 9:42 AM; Ar41 bk val,er = @ 8/7/17 2:49 PM; Average background @ 8/7/17 2:49 PM; Ar40 bk val,er = @ 8/7/17 2:49 PM; Average background @ 8/7/17 2:49 PM; Ar39 bk val,er = @ 8/7/17 2:49 PM; Average background @ 8/7/17 2:49 PM; Ar38 bk val,er = @ 8/7/17 2:49 PM; Average backg…	N:11	LPPLLPAAAAAA	1	Pychron Script	1	Fusions CO2	5	0	0	0	0	30	30	168			0
	17	5	6.10007	0.0051014	5.4894	0.362316	100.013	73.3769	22.557	0.126671	0.0017491								65736-17	K17-BS-1	37	2017-07-08	11.6667	3582359000	Heizler, M	Sanidine	11	IR1009		129.138.12.160	7.875	Ar40 = P @ 8/7/17 9:42 AM; Ar39 = P @ 8/7/17 9:42 AM; Ar38 = L @ 8/7/17 9:42 AM; Ar37 = L @ 8/7/17 9:42 AM; Ar36 = P @ 8/7/17 9:42 AM; Ar41 bk val,er = @ 8/7/17 2:49 PM; Average background @ 8/7/17 2:49 PM; Ar40 bk val,er = @ 8/7/17 2:49 PM; Average background @ 8/7/17 2:49 PM; Ar39 bk val,er = @ 8/7/17 2:49 PM; Average background @ 8/7/17 2:49 PM; Ar38 bk val,er = @ 8/7/17 2:49 PM; Average backg…	N:11	LPPLLPAAAAAA	1	Pychron Script	1	Fusions CO2	5	0	0	0	0	30	30	172			0
	09	5	4.78476	0.0233005	0.5868	3.679	21.8967	96.4086	23.2336	0.0130755	0.0017491								65736-09	K17-BS-1	37	2017-07-08	9.35	3582350000	Heizler, M	Sanidine	11	IR1009		129.138.12.160	7.875	Ar40 = P @ 8/7/17 9:42 AM; Ar39 = P @ 8/7/17 9:42 AM; Ar38 = L @ 8/7/17 9:42 AM; Ar37 = L @ 8/7/17 9:42 AM; Ar36 = P @ 8/7/17 9:42 AM; Ar41 bk val,er = @ 8/7/17 2:49 PM; Average background @ 8/7/17 2:49 PM; Ar40 bk val,er = @ 8/7/17 2:49 PM; Average background @ 8/7/17 2:49 PM; Ar39 bk val,er = @ 8/7/17 2:49 PM; Average background @ 8/7/17 2:49 PM; Ar38 bk val,er = @ 8/7/17 2:49 PM; Average backg…	N:11	LPPLLPAAAAAA	1	Pychron Script	1	Fusions CO2	5	0	0	0	0	30	30	164			0
	36	4.5	4.72591	0.0245798	0.3757	2.81406	20.757	97.6891	23.252	0.0126972	0.0018433								65736-36	K17-BS-1	37	2017-07-12	19.7833	3582734000	Heizler, M	Sanidine	11	IR1009		129.138.12.160	7.875	Ar40 = L @ 8/7/17 9:44 AM; Ar39 = L @ 8/7/17 9:44 AM; Ar38 = L @ 8/7/17 9:44 AM; Ar37 = L @ 8/7/17 9:44 AM; Ar36 = L @ 8/7/17 9:44 AM; Ar40 = L @ 8/7/17 4:11 PM; Ar39 = L @ 8/7/17 4:11 PM; Ar38 = L @ 8/7/17 4:11 PM; Ar37 = L @ 8/7/17 4:11 PM; Ar36 = L @ 8/7/17 4:11 PM; Ar41 bk val,er = @ 8/7/17 4:17 PM; Average background @ 8/7/17 4:17 PM; Ar40 bk val,er = @ 8/7/17 4:17 PM; Average background @ 8…	N:11	ALLLLLAAAAAA	1	Pychron Script	1	Fusions CO2	4.5	0	0	0	0	30	30	56			0
	63	4.5	6.75866	0.0203574	6.1401	0.22839	25.0623	73.1442	24.9009	0.187396	0.0018433								65736-63	K17-BS-1	37	2017-07-13	0.6	3582751000	Heizler, M	Sanidine	11	IR1009		129.138.12.160	7.875	Ar40 = L @ 8/7/17 9:44 AM; Ar39 = L @ 8/7/17 9:44 AM; Ar38 = L @ 8/7/17 9:44 AM; Ar37 = L @ 8/7/17 9:44 AM; Ar36 = L @ 8/7/17 9:44 AM; Ar40 = L @ 8/7/17 4:11 PM; Ar39 = L @ 8/7/17 4:11 PM; Ar38 = L @ 8/7/17 4:11 PM; Ar37 = L @ 8/7/17 4:11 PM; Ar36 = L @ 8/7/17 4:11 PM; Ar41 bk val,er = @ 8/7/17 4:17 PM; Average background @ 8/7/17 4:17 PM; Ar40 bk val,er = @ 8/7/17 4:17 PM; Average background @ 8…	N:11	ALLLLLAAAAAA	1	Pychron Script	1	Fusions CO2	4.5	0	0	0	0	30	30	83			0
	71	4.5	5.07651	0.0147295	0.3054	4.62081	34.6382	98.2427	25.1088	0.0112476	0.0018433								65736-71	K17-BS-1	37	2017-07-13	1.93333	3582756000	Heizler, M	Sanidine	11	IR1009		129.138.12.160	7.875	Ar40 = L @ 8/7/17 9:44 AM; Ar39 = L @ 8/7/17 9:44 AM; Ar38 = L @ 8/7/17 9:44 AM; Ar37 = L @ 8/7/17 9:44 AM; Ar36 = L @ 8/7/17 9:44 AM; Ar40 = L @ 8/7/17 4:11 PM; Ar39 = L @ 8/7/17 4:11 PM; Ar38 = L @ 8/7/17 4:11 PM; Ar37 = L @ 8/7/17 4:11 PM; Ar36 = L @ 8/7/17 4:11 PM; Ar41 bk val,er = @ 8/7/17 4:17 PM; Average background @ 8/7/17 4:17 PM; Ar40 bk val,er = @ 8/7/17 4:17 PM; Average background @ 8…	N:11	ALLLLLAAAAAA	1	Pychron Script	1	Fusions CO2	4.5	0	0	0	0	30	30	91			0
	16	5	5.26741	0.0070468	0.5407	4.20648	72.4022	96.9724	25.7133	0.0119467	0.0017491								65736-16	K17-BS-1	37	2017-07-08	11.25	3582357000	Heizler, M	Sanidine	11	IR1009		129.138.12.160	7.875	Ar40 = P @ 8/7/17 9:42 AM; Ar39 = P @ 8/7/17 9:42 AM; Ar38 = L @ 8/7/17 9:42 AM; Ar37 = L @ 8/7/17 9:42 AM; Ar36 = P @ 8/7/17 9:42 AM; Ar41 bk val,er = @ 8/7/17 2:49 PM; Average background @ 8/7/17 2:49 PM; Ar40 bk val,er = @ 8/7/17 2:49 PM; Average background @ 8/7/17 2:49 PM; Ar39 bk val,er = @ 8/7/17 2:49 PM; Average background @ 8/7/17 2:49 PM; Ar38 bk val,er = @ 8/7/17 2:49 PM; Average backg…	N:11	LPPLLPAAAAAA	1	Pychron Script	1	Fusions CO2	5	0	0	0	0	30	30	171			0
	60	4.5	8.76526	0.010904	11.9758	2.96689	46.7905	59.5963	26.3098	0.0608479	0.0018433								65736-60	K17-BS-1	37	2017-07-13	0.0333333	3582749000	Heizler, M	Sanidine	11	IR1009		129.138.12.160	7.875	Ar40 = L @ 8/7/17 9:44 AM; Ar39 = L @ 8/7/17 9:44 AM; Ar38 = L @ 8/7/17 9:44 AM; Ar37 = L @ 8/7/17 9:44 AM; Ar36 = L @ 8/7/17 9:44 AM; Ar40 = L @ 8/7/17 4:11 PM; Ar39 = L @ 8/7/17 4:11 PM; Ar38 = L @ 8/7/17 4:11 PM; Ar37 = L @ 8/7/17 4:11 PM; Ar36 = L @ 8/7/17 4:11 PM; Ar41 bk val,er = @ 8/7/17 4:17 PM; Average background @ 8/7/17 4:17 PM; Ar40 bk val,er = @ 8/7/17 4:17 PM; Average background @ 8…	N:11	ALLLLLAAAAAA	1	Pychron Script	1	Fusions CO2	4.5	0	0	0	0	30	30	80			0
	31	4.5	5.44016	0.0066989	0.4233	5.96036	76.1624	97.7074	26.7517	0.00944	0.0018433								65736-31	K17-BS-1	37	2017-07-12	19.0167	3582731000	Heizler, M	Sanidine	11	IR1009		129.138.12.160	7.875	Ar40 = L @ 8/7/17 9:44 AM; Ar39 = L @ 8/7/17 9:44 AM; Ar38 = L @ 8/7/17 9:44 AM; Ar37 = L @ 8/7/17 9:44 AM; Ar36 = L @ 8/7/17 9:44 AM; Ar40 = L @ 8/7/17 4:11 PM; Ar39 = L @ 8/7/17 4:11 PM; Ar38 = L @ 8/7/17 4:11 PM; Ar37 = L @ 8/7/17 4:11 PM; Ar36 = L @ 8/7/17 4:11 PM; Ar41 bk val,er = @ 8/7/17 4:17 PM; Average background @ 8/7/17 4:17 PM; Ar40 bk val,er = @ 8/7/17 4:17 PM; Average background @ 8…	N:11	ALLLLLAAAAAA	1	Pychron Script	1	Fusions CO2	4.5	0	0	0	0	30	30	51			0
	40	4.5	5.5723	0.0064854	0.6819	4.8079	78.6696	96.3875	27.0303	0.0123066	0.0018433								65736-40	K17-BS-1	37	2017-07-12	20.2333	3582735000	Heizler, M	Sanidine	11	IR1009		129.138.12.160	7.875	Ar40 = L @ 8/7/17 9:44 AM; Ar39 = L @ 8/7/17 9:44 AM; Ar38 = L @ 8/7/17 9:44 AM; Ar37 = L @ 8/7/17 9:44 AM; Ar36 = L @ 8/7/17 9:44 AM; Ar40 = L @ 8/7/17 4:11 PM; Ar39 = L @ 8/7/17 4:11 PM; Ar38 = L @ 8/7/17 4:11 PM; Ar37 = L @ 8/7/17 4:11 PM; Ar36 = L @ 8/7/17 4:11 PM; Ar41 bk val,er = @ 8/7/17 4:17 PM; Average background @ 8/7/17 4:17 PM; Ar40 bk val,er = @ 8/7/17 4:17 PM; Average background @ 8…	N:11	ALLLLLAAAAAA	1	Pychron Script	1	Fusions CO2	4.5	0	0	0	0	30	30	60			0
	65	4.5	5.53542	0.0082717	0.5275	3.1014	61.6807	97.1921	27.075	0.0157239	0.0018433								65736-65	K17-BS-1	37	2017-07-13	1.25	3582753000	Heizler, M	Sanidine	11	IR1009		129.138.12.160	7.875	Ar40 = L @ 8/7/17 9:44 AM; Ar39 = L @ 8/7/17 9:44 AM; Ar38 = L @ 8/7/17 9:44 AM; Ar37 = L @ 8/7/17 9:44 AM; Ar36 = L @ 8/7/17 9:44 AM; Ar40 = L @ 8/7/17 4:11 PM; Ar39 = L @ 8/7/17 4:11 PM; Ar38 = L @ 8/7/17 4:11 PM; Ar37 = L @ 8/7/17 4:11 PM; Ar36 = L @ 8/7/17 4:11 PM; Ar41 bk val,er = @ 8/7/17 4:17 PM; Average background @ 8/7/17 4:17 PM; Ar40 bk val,er = @ 8/7/17 4:17 PM; Average background @ 8…	N:11	ALLLLLAAAAAA	1	Pychron Script	1	Fusions CO2	4.5	0	0	0	0	30	30	85			0
	33	4.5	5.47831	0.0066839	0.3165	4.97839	76.3333	98.3	27.1004	0.0103468	0.0018433								65736-33	K17-BS-1	37	2017-07-12	19.2333	3582732000	Heizler, M	Sanidine	11	IR1009		129.138.12.160	7.875	Ar40 = L @ 8/7/17 9:44 AM; Ar39 = L @ 8/7/17 9:44 AM; Ar38 = L @ 8/7/17 9:44 AM; Ar37 = L @ 8/7/17 9:44 AM; Ar36 = L @ 8/7/17 9:44 AM; Ar40 = L @ 8/7/17 4:11 PM; Ar39 = L @ 8/7/17 4:11 PM; Ar38 = L @ 8/7/17 4:11 PM; Ar37 = L @ 8/7/17 4:11 PM; Ar36 = L @ 8/7/17 4:11 PM; Ar41 bk val,er = @ 8/7/17 4:17 PM; Average background @ 8/7/17 4:17 PM; Ar40 bk val,er = @ 8/7/17 4:17 PM; Average background @ 8…	N:11	ALLLLLAAAAAA	1	Pychron Script	1	Fusions CO2	4.5	0	0	0	0	30	30	53			0
	43	4.5	5.57276	0.0047633	0.6181	3.40575	107.111	96.7243	27.1263	0.0138686	0.0018433								65736-43	K17-BS-1	37	2017-07-12	21.45	3582740000	Heizler, M	Sanidine	11	IR1009		129.138.12.160	7.875	Ar40 = L @ 8/7/17 9:44 AM; Ar39 = L @ 8/7/17 9:44 AM; Ar38 = L @ 8/7/17 9:44 AM; Ar37 = L @ 8/7/17 9:44 AM; Ar36 = L @ 8/7/17 9:44 AM; Ar40 = L @ 8/7/17 4:11 PM; Ar39 = L @ 8/7/17 4:11 PM; Ar38 = L @ 8/7/17 4:11 PM; Ar37 = L @ 8/7/17 4:11 PM; Ar36 = L @ 8/7/17 4:11 PM; Ar41 bk val,er = @ 8/7/17 4:17 PM; Average background @ 8/7/17 4:17 PM; Ar40 bk val,er = @ 8/7/17 4:17 PM; Average background @ 8…	N:11	ALLLLLAAAAAA	1	Pychron Script	1	Fusions CO2	4.5	0	0	0	0	30	30	63			0
	10	5	5.49852	0.0092994	0.336	6.6558	54.8642	98.2053	27.1739	0.0080154	0.0017491								65736-10	K17-BS-1	37	2017-07-08	9.55	3582351000	Heizler, M	Sanidine	11	IR1009		129.138.12.160	7.875	Ar40 = P @ 8/7/17 9:42 AM; Ar39 = P @ 8/7/17 9:42 AM; Ar38 = L @ 8/7/17 9:42 AM; Ar37 = L @ 8/7/17 9:42 AM; Ar36 = P @ 8/7/17 9:42 AM; Ar41 bk val,er = @ 8/7/17 2:49 PM; Average background @ 8/7/17 2:49 PM; Ar40 bk val,er = @ 8/7/17 2:49 PM; Average background @ 8/7/17 2:49 PM; Ar39 bk val,er = @ 8/7/17 2:49 PM; Average background @ 8/7/17 2:49 PM; Ar38 bk val,er = @ 8/7/17 2:49 PM; Average backg…	N:11	LPPLLPAAAAAA	1	Pychron Script	1	Fusions CO2	5	0	0	0	0	30	30	165			0
	38	4.5	5.63886	0.018615	0.4683	6.88247	27.4082	97.569	27.6843	0.0094917	0.0018433								65736-38	K17-BS-1	37	2017-07-12	20.0167	3582734000	Heizler, M	Sanidine	11	IR1009		129.138.12.160	7.875	Ar40 = L @ 8/7/17 9:44 AM; Ar39 = L @ 8/7/17 9:44 AM; Ar38 = L @ 8/7/17 9:44 AM; Ar37 = L @ 8/7/17 9:44 AM; Ar36 = L @ 8/7/17 9:44 AM; Ar40 = L @ 8/7/17 4:11 PM; Ar39 = L @ 8/7/17 4:11 PM; Ar38 = L @ 8/7/17 4:11 PM; Ar37 = L @ 8/7/17 4:11 PM; Ar36 = L @ 8/7/17 4:11 PM; Ar41 bk val,er = @ 8/7/17 4:17 PM; Average background @ 8/7/17 4:17 PM; Ar40 bk val,er = @ 8/7/17 4:17 PM; Average background @ 8…	N:11	ALLLLLAAAAAA	1	Pychron Script	1	Fusions CO2	4.5	0	0	0	0	30	30	58			0
	19	5	5.77021	0.0121984	0.8698	1.71061	41.8255	95.5561	27.7451	0.0270239	0.0017491								65736-19	K17-BS-1	37	2017-07-08	12.1	3582360000	Heizler, M	Sanidine	11	IR1009		129.138.12.160	7.875	Ar40 = P @ 8/7/17 9:42 AM; Ar39 = P @ 8/7/17 9:42 AM; Ar38 = L @ 8/7/17 9:42 AM; Ar37 = L @ 8/7/17 9:42 AM; Ar36 = P @ 8/7/17 9:42 AM; Ar41 bk val,er = @ 8/7/17 2:49 PM; Average background @ 8/7/17 2:49 PM; Ar40 bk val,er = @ 8/7/17 2:49 PM; Average background @ 8/7/17 2:49 PM; Ar39 bk val,er = @ 8/7/17 2:49 PM; Average background @ 8/7/17 2:49 PM; Ar38 bk val,er = @ 8/7/17 2:49 PM; Average backg…	N:11	LPPLLPAAAAAA	1	Pychron Script	1	Fusions CO2	5	0	0	0	0	30	30	174			0
	49	4.5	5.81595	0.0106481	0.7403	1.0077	47.915	96.2477	28.1645	0.0375054	0.0018433								65736-49	K17-BS-1	37	2017-07-12	22.1333	3582742000	Heizler, M	Sanidine	11	IR1009		129.138.12.160	7.875	Ar40 = L @ 8/7/17 9:44 AM; Ar39 = L @ 8/7/17 9:44 AM; Ar38 = L @ 8/7/17 9:44 AM; Ar37 = L @ 8/7/17 9:44 AM; Ar36 = L @ 8/7/17 9:44 AM; Ar40 = L @ 8/7/17 4:11 PM; Ar39 = L @ 8/7/17 4:11 PM; Ar38 = L @ 8/7/17 4:11 PM; Ar37 = L @ 8/7/17 4:11 PM; Ar36 = L @ 8/7/17 4:11 PM; Ar41 bk val,er = @ 8/7/17 4:17 PM; Average background @ 8/7/17 4:17 PM; Ar40 bk val,er = @ 8/7/17 4:17 PM; Average background @ 8…	N:11	ALLLLLAAAAAA	1	Pychron Script	1	Fusions CO2	4.5	0	0	0	0	30	30	69			0
	41	4.5	5.70681	0.0079501	0.3618	4.5725	64.1758	98.1351	28.177	0.0112636	0.0018433								65736-41	K17-BS-1	37	2017-07-12	21.2333	3582739000	Heizler, M	Sanidine	11	IR1009		129.138.12.160	7.875	Ar40 = L @ 8/7/17 9:44 AM; Ar39 = L @ 8/7/17 9:44 AM; Ar38 = L @ 8/7/17 9:44 AM; Ar37 = L @ 8/7/17 9:44 AM; Ar36 = L @ 8/7/17 9:44 AM; Ar40 = L @ 8/7/17 4:11 PM; Ar39 = L @ 8/7/17 4:11 PM; Ar38 = L @ 8/7/17 4:11 PM; Ar37 = L @ 8/7/17 4:11 PM; Ar36 = L @ 8/7/17 4:11 PM; Ar41 bk val,er = @ 8/7/17 4:17 PM; Average background @ 8/7/17 4:17 PM; Ar40 bk val,er = @ 8/7/17 4:17 PM; Average background @ 8…	N:11	ALLLLLAAAAAA	1	Pychron Script	1	Fusions CO2	4.5	0	0	0	0	30	30	61			0
	28	5	5.66857	0.0068363	0.223	3.31157	74.6316	98.8458	28.1904	0.013319	0.0017491								65736-28	K17-BS-1	37	2017-07-08	14.8833	3582370000	Heizler, M	Sanidine	11	IR1009		129.138.12.160	7.875	Ar40 = P @ 8/7/17 9:42 AM; Ar39 = P @ 8/7/17 9:42 AM; Ar38 = L @ 8/7/17 9:42 AM; Ar37 = L @ 8/7/17 9:42 AM; Ar36 = P @ 8/7/17 9:42 AM; Ar41 bk val,er = @ 8/7/17 2:49 PM; Average background @ 8/7/17 2:49 PM; Ar40 bk val,er = @ 8/7/17 2:49 PM; Average background @ 8/7/17 2:49 PM; Ar39 bk val,er = @ 8/7/17 2:49 PM; Average background @ 8/7/17 2:49 PM; Ar38 bk val,er = @ 8/7/17 2:49 PM; Average backg…	N:11	LPPLLPAAAAAA	1	Pychron Script	1	Fusions CO2	5	0	0	0	0	30	30	183			0
	26	5	5.75429	0.0057206	0.5065	5.33066	89.1871	97.4029	28.1995	0.0101243	0.0017491								65736-26	K17-BS-1	37	2017-07-08	14.45	3582369000	Heizler, M	Sanidine	11	IR1009		129.138.12.160	7.875	Ar40 = P @ 8/7/17 9:42 AM; Ar39 = P @ 8/7/17 9:42 AM; Ar38 = L @ 8/7/17 9:42 AM; Ar37 = L @ 8/7/17 9:42 AM; Ar36 = P @ 8/7/17 9:42 AM; Ar41 bk val,er = @ 8/7/17 2:49 PM; Average background @ 8/7/17 2:49 PM; Ar40 bk val,er = @ 8/7/17 2:49 PM; Average background @ 8/7/17 2:49 PM; Ar39 bk val,er = @ 8/7/17 2:49 PM; Average background @ 8/7/17 2:49 PM; Ar38 bk val,er = @ 8/7/17 2:49 PM; Average backg…	N:11	LPPLLPAAAAAA	1	Pychron Script	1	Fusions CO2	5	0	0	0	0	30	30	181			0
	03	5	5.71429	0.0120849	0.3643	6.51172	42.2183	98.1302	28.2124	0.0084114	0.0017491								65736-03	K17-BS-1	37	2017-07-08	7.61667	3582344000	Heizler, M	Sanidine	11	IR1009		129.138.12.160	7.875	Ar40 = P @ 8/7/17 9:42 AM; Ar39 = P @ 8/7/17 9:42 AM; Ar38 = L @ 8/7/17 9:42 AM; Ar37 = L @ 8/7/17 9:42 AM; Ar36 = P @ 8/7/17 9:42 AM; Ar41 bk val,er = @ 8/7/17 2:49 PM; Average background @ 8/7/17 2:49 PM; Ar40 bk val,er = @ 8/7/17 2:49 PM; Average background @ 8/7/17 2:49 PM; Ar39 bk val,er = @ 8/7/17 2:49 PM; Average background @ 8/7/17 2:49 PM; Ar38 bk val,er = @ 8/7/17 2:49 PM; Average backg…	N:11	LPPLLPAAAAAA	1	Pychron Script	1	Fusions CO2	5	0	0	0	0	30	30	158			0
	24	5	5.82191	0.0184577	0.444	4.26232	27.6418	97.7684	28.6353	0.0117571	0.0017491								65736-24	K17-BS-1	37	2017-07-08	13.15	3582364000	Heizler, M	Sanidine	11	IR1009		129.138.12.160	7.875	Ar40 = P @ 8/7/17 9:42 AM; Ar39 = P @ 8/7/17 9:42 AM; Ar38 = L @ 8/7/17 9:42 AM; Ar37 = L @ 8/7/17 9:42 AM; Ar36 = P @ 8/7/17 9:42 AM; Ar41 bk val,er = @ 8/7/17 2:49 PM; Average background @ 8/7/17 2:49 PM; Ar40 bk val,er = @ 8/7/17 2:49 PM; Average background @ 8/7/17 2:49 PM; Ar39 bk val,er = @ 8/7/17 2:49 PM; Average background @ 8/7/17 2:49 PM; Ar38 bk val,er = @ 8/7/17 2:49 PM; Average backg…	N:11	LPPLLPAAAAAA	1	Pychron Script	1	Fusions CO2	5	0	0	0	0	30	30	179			0
	68	4.5	5.98601	0.0073478	0.1648	8.67851	69.4363	99.1957	29.8632	0.006529	0.0018433								65736-68	K17-BS-1	37	2017-07-13	1.58333	3582755000	Heizler, M	Sanidine	11	IR1009		129.138.12.160	7.875	Ar40 = L @ 8/7/17 9:44 AM; Ar39 = L @ 8/7/17 9:44 AM; Ar38 = L @ 8/7/17 9:44 AM; Ar37 = L @ 8/7/17 9:44 AM; Ar36 = L @ 8/7/17 9:44 AM; Ar40 = L @ 8/7/17 4:11 PM; Ar39 = L @ 8/7/17 4:11 PM; Ar38 = L @ 8/7/17 4:11 PM; Ar37 = L @ 8/7/17 4:11 PM; Ar36 = L @ 8/7/17 4:11 PM; Ar41 bk val,er = @ 8/7/17 4:17 PM; Average background @ 8/7/17 4:17 PM; Ar40 bk val,er = @ 8/7/17 4:17 PM; Average background @ 8…	N:11	ALLLLLAAAAAA	1	Pychron Script	1	Fusions CO2	4.5	0	0	0	0	30	30	88			0
	21	5	6.02933	0.0091105	0.2209	4.65835	56.0018	98.9279	29.9974	0.0104168	0.0017491								65736-21	K17-BS-1	37	2017-07-08	12.5167	3582362000	Heizler, M	Sanidine	11	IR1009		129.138.12.160	7.875	Ar40 = P @ 8/7/17 9:42 AM; Ar39 = P @ 8/7/17 9:42 AM; Ar38 = L @ 8/7/17 9:42 AM; Ar37 = L @ 8/7/17 9:42 AM; Ar36 = P @ 8/7/17 9:42 AM; Ar41 bk val,er = @ 8/7/17 2:49 PM; Average background @ 8/7/17 2:49 PM; Ar40 bk val,er = @ 8/7/17 2:49 PM; Average background @ 8/7/17 2:49 PM; Ar39 bk val,er = @ 8/7/17 2:49 PM; Average background @ 8/7/17 2:49 PM; Ar38 bk val,er = @ 8/7/17 2:49 PM; Average backg…	N:11	LPPLLPAAAAAA	1	Pychron Script	1	Fusions CO2	5	0	0	0	0	30	30	176			0
	14	5	6.42784	0.0087077	1.5679	0.666403	58.5923	92.793	29.9996	0.0620517	0.0017491								65736-14	K17-BS-1	37	2017-07-08	10.8333	3582356000	Heizler, M	Sanidine	11	IR1009		129.138.12.160	7.875	Ar40 = P @ 8/7/17 9:42 AM; Ar39 = P @ 8/7/17 9:42 AM; Ar38 = L @ 8/7/17 9:42 AM; Ar37 = L @ 8/7/17 9:42 AM; Ar36 = P @ 8/7/17 9:42 AM; Ar41 bk val,er = @ 8/7/17 2:49 PM; Average background @ 8/7/17 2:49 PM; Ar40 bk val,er = @ 8/7/17 2:49 PM; Average background @ 8/7/17 2:49 PM; Ar39 bk val,er = @ 8/7/17 2:49 PM; Average background @ 8/7/17 2:49 PM; Ar38 bk val,er = @ 8/7/17 2:49 PM; Average backg…	N:11	LPPLLPAAAAAA	1	Pychron Script	1	Fusions CO2	5	0	0	0	0	30	30	169			0
	12	5	6.46664	0.0067714	1.667	9.50711	75.3469	92.3804	30.0463	0.0102704	0.0017491								65736-12	K17-BS-1	37	2017-07-08	10.1833	3582354000	Heizler, M	Sanidine	11	IR1009		129.138.12.160	7.875	Ar40 = P @ 8/7/17 9:42 AM; Ar39 = P @ 8/7/17 9:42 AM; Ar38 = L @ 8/7/17 9:42 AM; Ar37 = L @ 8/7/17 9:42 AM; Ar36 = P @ 8/7/17 9:42 AM; Ar41 bk val,er = @ 8/7/17 2:49 PM; Average background @ 8/7/17 2:49 PM; Ar40 bk val,er = @ 8/7/17 2:49 PM; Average background @ 8/7/17 2:49 PM; Ar39 bk val,er = @ 8/7/17 2:49 PM; Average background @ 8/7/17 2:49 PM; Ar38 bk val,er = @ 8/7/17 2:49 PM; Average backg…	N:11	LPPLLPAAAAAA	1	Pychron Script	1	Fusions CO2	5	0	0	0	0	30	30	167			0
	69	4.5	7.31448	0.0200663	3.1095	0.70541	25.4259	87.445	32.1568	0.0721454	0.0018433								65736-69	K17-BS-1	37	2017-07-13	1.7	3582755000	Heizler, M	Sanidine	11	IR1009		129.138.12.160	7.875	Ar40 = L @ 8/7/17 9:44 AM; Ar39 = L @ 8/7/17 9:44 AM; Ar38 = L @ 8/7/17 9:44 AM; Ar37 = L @ 8/7/17 9:44 AM; Ar36 = L @ 8/7/17 9:44 AM; Ar40 = L @ 8/7/17 4:11 PM; Ar39 = L @ 8/7/17 4:11 PM; Ar38 = L @ 8/7/17 4:11 PM; Ar37 = L @ 8/7/17 4:11 PM; Ar36 = L @ 8/7/17 4:11 PM; Ar41 bk val,er = @ 8/7/17 4:17 PM; Average background @ 8/7/17 4:17 PM; Ar40 bk val,er = @ 8/7/17 4:17 PM; Average background @ 8…	N:11	ALLLLLAAAAAA	1	Pychron Script	1	Fusions CO2	4.5	0	0	0	0	30	30	89			0
	44	4.5	6.73317	0.0093161	1.0503	6.37734	54.7658	95.3957	32.2878	0.0132458	0.0018433								65736-44	K17-BS-1	37	2017-07-12	21.5667	3582740000	Heizler, M	Sanidine	11	IR1009		129.138.12.160	7.875	Ar40 = L @ 8/7/17 9:44 AM; Ar39 = L @ 8/7/17 9:44 AM; Ar38 = L @ 8/7/17 9:44 AM; Ar37 = L @ 8/7/17 9:44 AM; Ar36 = L @ 8/7/17 9:44 AM; Ar40 = L @ 8/7/17 4:11 PM; Ar39 = L @ 8/7/17 4:11 PM; Ar38 = L @ 8/7/17 4:11 PM; Ar37 = L @ 8/7/17 4:11 PM; Ar36 = L @ 8/7/17 4:11 PM; Ar41 bk val,er = @ 8/7/17 4:17 PM; Average background @ 8/7/17 4:17 PM; Ar40 bk val,er = @ 8/7/17 4:17 PM; Average background @ 8…	N:11	ALLLLLAAAAAA	1	Pychron Script	1	Fusions CO2	4.5	0	0	0	0	30	30	64			0
	66	4.5	6.68728	0.0081088	0.891	4.89877	62.9198	96.0676	32.2932	0.0143147	0.0018433								65736-66	K17-BS-1	37	2017-07-13	1.36667	3582754000	Heizler, M	Sanidine	11	IR1009		129.138.12.160	7.875	Ar40 = L @ 8/7/17 9:44 AM; Ar39 = L @ 8/7/17 9:44 AM; Ar38 = L @ 8/7/17 9:44 AM; Ar37 = L @ 8/7/17 9:44 AM; Ar36 = L @ 8/7/17 9:44 AM; Ar40 = L @ 8/7/17 4:11 PM; Ar39 = L @ 8/7/17 4:11 PM; Ar38 = L @ 8/7/17 4:11 PM; Ar37 = L @ 8/7/17 4:11 PM; Ar36 = L @ 8/7/17 4:11 PM; Ar41 bk val,er = @ 8/7/17 4:17 PM; Average background @ 8/7/17 4:17 PM; Ar40 bk val,er = @ 8/7/17 4:17 PM; Average background @ 8…	N:11	ALLLLLAAAAAA	1	Pychron Script	1	Fusions CO2	4.5	0	0	0	0	30	30	86			0
	37	4.5	6.59016	0.008751	0.5474	7.89846	58.3024	97.553	32.3155	0.0098393	0.0018433								65736-37	K17-BS-1	37	2017-07-12	19.9	3582734000	Heizler, M	Sanidine	11	IR1009		129.138.12.160	7.875	Ar40 = L @ 8/7/17 9:44 AM; Ar39 = L @ 8/7/17 9:44 AM; Ar38 = L @ 8/7/17 9:44 AM; Ar37 = L @ 8/7/17 9:44 AM; Ar36 = L @ 8/7/17 9:44 AM; Ar40 = L @ 8/7/17 4:11 PM; Ar39 = L @ 8/7/17 4:11 PM; Ar38 = L @ 8/7/17 4:11 PM; Ar37 = L @ 8/7/17 4:11 PM; Ar36 = L @ 8/7/17 4:11 PM; Ar41 bk val,er = @ 8/7/17 4:17 PM; Average background @ 8/7/17 4:17 PM; Ar40 bk val,er = @ 8/7/17 4:17 PM; Average background @ 8…	N:11	ALLLLLAAAAAA	1	Pychron Script	1	Fusions CO2	4.5	0	0	0	0	30	30	57			0
	23	5	6.52128	0.0082816	0.2764	3.5567	61.6069	98.7563	32.3712	0.0130406	0.0017491								65736-23	K17-BS-1	37	2017-07-08	12.95	3582363000	Heizler, M	Sanidine	11	IR1009		129.138.12.160	7.875	Ar40 = P @ 8/7/17 9:42 AM; Ar39 = P @ 8/7/17 9:42 AM; Ar38 = L @ 8/7/17 9:42 AM; Ar37 = L @ 8/7/17 9:42 AM; Ar36 = P @ 8/7/17 9:42 AM; Ar41 bk val,er = @ 8/7/17 2:49 PM; Average background @ 8/7/17 2:49 PM; Ar40 bk val,er = @ 8/7/17 2:49 PM; Average background @ 8/7/17 2:49 PM; Ar39 bk val,er = @ 8/7/17 2:49 PM; Average background @ 8/7/17 2:49 PM; Ar38 bk val,er = @ 8/7/17 2:49 PM; Average backg…	N:11	LPPLLPAAAAAA	1	Pychron Script	1	Fusions CO2	5	0	0	0	0	30	30	178			0
	34	4.5	6.67645	0.005264	0.3979	4.6487	96.9233	98.2432	32.9649	0.0128188	0.0018433								65736-34	K17-BS-1	37	2017-07-12	19.35	3582732000	Heizler, M	Sanidine	11	IR1009		129.138.12.160	7.875	Ar40 = L @ 8/7/17 9:44 AM; Ar39 = L @ 8/7/17 9:44 AM; Ar38 = L @ 8/7/17 9:44 AM; Ar37 = L @ 8/7/17 9:44 AM; Ar36 = L @ 8/7/17 9:44 AM; Ar40 = L @ 8/7/17 4:11 PM; Ar39 = L @ 8/7/17 4:11 PM; Ar38 = L @ 8/7/17 4:11 PM; Ar37 = L @ 8/7/17 4:11 PM; Ar36 = L @ 8/7/17 4:11 PM; Ar41 bk val,er = @ 8/7/17 4:17 PM; Average background @ 8/7/17 4:17 PM; Ar40 bk val,er = @ 8/7/17 4:17 PM; Average background @ 8…	N:11	ALLLLLAAAAAA	1	Pychron Script	1	Fusions CO2	4.5	0	0	0	0	30	30	54			0
	30	4.5	6.63587	0.0052415	0.2561	7.42285	97.3393	98.8646	32.9714	0.0083041	0.0018433								65736-30	K17-BS-1	37	2017-07-12	18.9	3582730000	Heizler, M	Sanidine	11	IR1009		129.138.12.160	7.875	Ar40 = L @ 8/7/17 9:44 AM; Ar39 = L @ 8/7/17 9:44 AM; Ar38 = L @ 8/7/17 9:44 AM; Ar37 = L @ 8/7/17 9:44 AM; Ar36 = L @ 8/7/17 9:44 AM; Ar40 = L @ 8/7/17 4:11 PM; Ar39 = L @ 8/7/17 4:11 PM; Ar38 = L @ 8/7/17 4:11 PM; Ar37 = L @ 8/7/17 4:11 PM; Ar36 = L @ 8/7/17 4:11 PM; Ar41 bk val,er = @ 8/7/17 4:17 PM; Average background @ 8/7/17 4:17 PM; Ar40 bk val,er = @ 8/7/17 4:17 PM; Average background @ 8…	N:11	ALLLLLAAAAAA	1	Pychron Script	1	Fusions CO2	4.5	0	0	0	0	30	30	50			0
	05	5	7.29662	0.0114826	2.3247	0.512727	44.4328	90.5865	33.2207	0.0840307	0.0017491								65736-05	K17-BS-1	37	2017-07-08	8.03333	3582346000	Heizler, M	Sanidine	11	IR1009		129.138.12.160	7.875	Ar40 = P @ 8/7/17 9:42 AM; Ar39 = P @ 8/7/17 9:42 AM; Ar38 = L @ 8/7/17 9:42 AM; Ar37 = L @ 8/7/17 9:42 AM; Ar36 = P @ 8/7/17 9:42 AM; Ar41 bk val,er = @ 8/7/17 2:49 PM; Average background @ 8/7/17 2:49 PM; Ar40 bk val,er = @ 8/7/17 2:49 PM; Average background @ 8/7/17 2:49 PM; Ar39 bk val,er = @ 8/7/17 2:49 PM; Average background @ 8/7/17 2:49 PM; Ar38 bk val,er = @ 8/7/17 2:49 PM; Average backg…	N:11	LPPLLPAAAAAA	1	Pychron Script	1	Fusions CO2	5	0	0	0	0	30	30	160			0
	61	4.5	6.79022	0.0057088	0.4812	5.60475	89.3715	97.9101	33.4096	0.0108944	0.0018433								65736-61	K17-BS-1	37	2017-07-13	0.366667	3582750000	Heizler, M	Sanidine	11	IR1009		129.138.12.160	7.875	Ar40 = L @ 8/7/17 9:44 AM; Ar39 = L @ 8/7/17 9:44 AM; Ar38 = L @ 8/7/17 9:44 AM; Ar37 = L @ 8/7/17 9:44 AM; Ar36 = L @ 8/7/17 9:44 AM; Ar40 = L @ 8/7/17 4:11 PM; Ar39 = L @ 8/7/17 4:11 PM; Ar38 = L @ 8/7/17 4:11 PM; Ar37 = L @ 8/7/17 4:11 PM; Ar36 = L @ 8/7/17 4:11 PM; Ar41 bk val,er = @ 8/7/17 4:17 PM; Average background @ 8/7/17 4:17 PM; Ar40 bk val,er = @ 8/7/17 4:17 PM; Average background @ 8…	N:11	ALLLLLAAAAAA	1	Pychron Script	1	Fusions CO2	4.5	0	0	0	0	30	30	81			0
	45	4.5	7.08397	0.0095635	1.2592	2.04205	53.3491	94.7519	33.7296	0.026696	0.0018433								65736-45	K17-BS-1	37	2017-07-12	21.6833	3582740000	Heizler, M	Sanidine	11	IR1009		129.138.12.160	7.875	Ar40 = L @ 8/7/17 9:44 AM; Ar39 = L @ 8/7/17 9:44 AM; Ar38 = L @ 8/7/17 9:44 AM; Ar37 = L @ 8/7/17 9:44 AM; Ar36 = L @ 8/7/17 9:44 AM; Ar40 = L @ 8/7/17 4:11 PM; Ar39 = L @ 8/7/17 4:11 PM; Ar38 = L @ 8/7/17 4:11 PM; Ar37 = L @ 8/7/17 4:11 PM; Ar36 = L @ 8/7/17 4:11 PM; Ar41 bk val,er = @ 8/7/17 4:17 PM; Average background @ 8/7/17 4:17 PM; Ar40 bk val,er = @ 8/7/17 4:17 PM; Average background @ 8…	N:11	ALLLLLAAAAAA	1	Pychron Script	1	Fusions CO2	4.5	0	0	0	0	30	30	65			0
	59	4.5	6.80844	0.0098089	0.1758	4.28255	52.0144	99.2479	33.9521	0.0105287	0.0018433								65736-59	K17-BS-1	37	2017-07-12	23.9167	3582749000	Heizler, M	Sanidine	11	IR1009		129.138.12.160	7.875	Ar40 = L @ 8/7/17 9:44 AM; Ar39 = L @ 8/7/17 9:44 AM; Ar38 = L @ 8/7/17 9:44 AM; Ar37 = L @ 8/7/17 9:44 AM; Ar36 = L @ 8/7/17 9:44 AM; Ar40 = L @ 8/7/17 4:11 PM; Ar39 = L @ 8/7/17 4:11 PM; Ar38 = L @ 8/7/17 4:11 PM; Ar37 = L @ 8/7/17 4:11 PM; Ar36 = L @ 8/7/17 4:11 PM; Ar41 bk val,er = @ 8/7/17 4:17 PM; Average background @ 8/7/17 4:17 PM; Ar40 bk val,er = @ 8/7/17 4:17 PM; Average background @ 8…	N:11	ALLLLLAAAAAA	1	Pychron Script	1	Fusions CO2	4.5	0	0	0	0	30	30	79			0
	35	4.5	6.89864	0.0066362	0.4327	6.67315	76.882	98.1521	34.022	0.0103852	0.0018433								65736-35	K17-BS-1	37	2017-07-12	19.4667	3582733000	Heizler, M	Sanidine	11	IR1009		129.138.12.160	7.875	Ar40 = L @ 8/7/17 9:44 AM; Ar39 = L @ 8/7/17 9:44 AM; Ar38 = L @ 8/7/17 9:44 AM; Ar37 = L @ 8/7/17 9:44 AM; Ar36 = L @ 8/7/17 9:44 AM; Ar40 = L @ 8/7/17 4:11 PM; Ar39 = L @ 8/7/17 4:11 PM; Ar38 = L @ 8/7/17 4:11 PM; Ar37 = L @ 8/7/17 4:11 PM; Ar36 = L @ 8/7/17 4:11 PM; Ar41 bk val,er = @ 8/7/17 4:17 PM; Average background @ 8/7/17 4:17 PM; Ar40 bk val,er = @ 8/7/17 4:17 PM; Average background @ 8…	N:11	ALLLLLAAAAAA	1	Pychron Script	1	Fusions CO2	4.5	0	0	0	0	30	30	55			0
	07	5	7.0865	0.0057688	0.5642	4.54055	88.442	97.6512	34.7642	0.0125228	0.0017491								65736-07	K17-BS-1	37	2017-07-08	8.91667	3582349000	Heizler, M	Sanidine	11	IR1009		129.138.12.160	7.875	Ar40 = P @ 8/7/17 9:42 AM; Ar39 = P @ 8/7/17 9:42 AM; Ar38 = L @ 8/7/17 9:42 AM; Ar37 = L @ 8/7/17 9:42 AM; Ar36 = P @ 8/7/17 9:42 AM; Ar41 bk val,er = @ 8/7/17 2:49 PM; Average background @ 8/7/17 2:49 PM; Ar40 bk val,er = @ 8/7/17 2:49 PM; Average background @ 8/7/17 2:49 PM; Ar39 bk val,er = @ 8/7/17 2:49 PM; Average background @ 8/7/17 2:49 PM; Ar38 bk val,er = @ 8/7/17 2:49 PM; Average backg…	N:11	LPPLLPAAAAAA	1	Pychron Script	1	Fusions CO2	5	0	0	0	0	30	30	162			0
	47	4.5	7.02098	0.0070426	0.3126	5.56366	72.4454	98.6908	34.8087	0.0099952	0.0018433								65736-47	K17-BS-1	37	2017-07-12	21.9167	3582741000	Heizler, M	Sanidine	11	IR1009		129.138.12.160	7.875	Ar40 = L @ 8/7/17 9:44 AM; Ar39 = L @ 8/7/17 9:44 AM; Ar38 = L @ 8/7/17 9:44 AM; Ar37 = L @ 8/7/17 9:44 AM; Ar36 = L @ 8/7/17 9:44 AM; Ar40 = L @ 8/7/17 4:11 PM; Ar39 = L @ 8/7/17 4:11 PM; Ar38 = L @ 8/7/17 4:11 PM; Ar37 = L @ 8/7/17 4:11 PM; Ar36 = L @ 8/7/17 4:11 PM; Ar41 bk val,er = @ 8/7/17 4:17 PM; Average background @ 8/7/17 4:17 PM; Ar40 bk val,er = @ 8/7/17 4:17 PM; Average background @ 8…	N:11	ALLLLLAAAAAA	1	Pychron Script	1	Fusions CO2	4.5	0	0	0	0	30	30	67			0
	01	5	7.00781	0.0061077	0.2281	6.55412	83.5346	99.0439	34.867	0.0081841	0.0017491								65736-01	K17-BS-1	37	2017-07-08	6.98333	3582342000	Heizler, M	Sanidine	11	IR1009		129.138.12.160	7.875	Ar40 = P @ 8/7/17 9:42 AM; Ar39 = P @ 8/7/17 9:42 AM; Ar38 = L @ 8/7/17 9:42 AM; Ar37 = L @ 8/7/17 9:42 AM; Ar36 = P @ 8/7/17 9:42 AM; Ar41 bk val,er = @ 8/7/17 2:49 PM; Average background @ 8/7/17 2:49 PM; Ar40 bk val,er = @ 8/7/17 2:49 PM; Average background @ 8/7/17 2:49 PM; Ar39 bk val,er = @ 8/7/17 2:49 PM; Average background @ 8/7/17 2:49 PM; Ar38 bk val,er = @ 8/7/17 2:49 PM; Average backg…	N:11	LPPLLPAAAAAA	1	Pychron Script	1	Fusions CO2	5	0	0	0	0	30	30	156			0
	70	4.5	7.2012	0.0078685	0.8784	4.10821	64.8413	96.4002	34.874	0.0159943	0.0018433								65736-70	K17-BS-1	37	2017-07-13	1.81667	3582755000	Heizler, M	Sanidine	11	IR1009		129.138.12.160	7.875	Ar40 = L @ 8/7/17 9:44 AM; Ar39 = L @ 8/7/17 9:44 AM; Ar38 = L @ 8/7/17 9:44 AM; Ar37 = L @ 8/7/17 9:44 AM; Ar36 = L @ 8/7/17 9:44 AM; Ar40 = L @ 8/7/17 4:11 PM; Ar39 = L @ 8/7/17 4:11 PM; Ar38 = L @ 8/7/17 4:11 PM; Ar37 = L @ 8/7/17 4:11 PM; Ar36 = L @ 8/7/17 4:11 PM; Ar41 bk val,er = @ 8/7/17 4:17 PM; Average background @ 8/7/17 4:17 PM; Ar40 bk val,er = @ 8/7/17 4:17 PM; Average background @ 8…	N:11	ALLLLLAAAAAA	1	Pychron Script	1	Fusions CO2	4.5	0	0	0	0	30	30	90			0
	06	5	7.07676	0.0062385	0.4016	8.15192	81.7831	98.3282	34.9552	0.0077915	0.0017491								65736-06	K17-BS-1	37	2017-07-08	8.7	3582348000	Heizler, M	Sanidine	11	IR1009		129.138.12.160	7.875	Ar40 = P @ 8/7/17 9:42 AM; Ar39 = P @ 8/7/17 9:42 AM; Ar38 = L @ 8/7/17 9:42 AM; Ar37 = L @ 8/7/17 9:42 AM; Ar36 = P @ 8/7/17 9:42 AM; Ar41 bk val,er = @ 8/7/17 2:49 PM; Average background @ 8/7/17 2:49 PM; Ar40 bk val,er = @ 8/7/17 2:49 PM; Average background @ 8/7/17 2:49 PM; Ar39 bk val,er = @ 8/7/17 2:49 PM; Average background @ 8/7/17 2:49 PM; Ar38 bk val,er = @ 8/7/17 2:49 PM; Average backg…	N:11	LPPLLPAAAAAA	1	Pychron Script	1	Fusions CO2	5	0	0	0	0	30	30	161			0
	32	4.5	7.15437	0.0012603	0.6441	1.66976	404.827	97.3381	34.9828	0.0244698	0.0018433								65736-32	K17-BS-1	37	2017-07-12	19.1167	3582731000	Heizler, M	Sanidine	11	IR1009		129.138.12.160	7.875	Ar40 = L @ 8/7/17 9:44 AM; Ar39 = L @ 8/7/17 9:44 AM; Ar38 = L @ 8/7/17 9:44 AM; Ar37 = L @ 8/7/17 9:44 AM; Ar36 = L @ 8/7/17 9:44 AM; Ar40 = L @ 8/7/17 4:11 PM; Ar39 = L @ 8/7/17 4:11 PM; Ar38 = L @ 8/7/17 4:11 PM; Ar37 = L @ 8/7/17 4:11 PM; Ar36 = L @ 8/7/17 4:11 PM; Ar41 bk val,er = @ 8/7/17 4:17 PM; Average background @ 8/7/17 4:17 PM; Ar40 bk val,er = @ 8/7/17 4:17 PM; Average background @ 8…	N:11	ALLLLLAAAAAA	1	Pychron Script	1	Fusions CO2	4.5	0	0	0	0	30	30	52			0
	29	4.5	7.67895	0.0076595	2.1986	3.43617	66.6106	91.5379	35.3104	0.0236852	0.0018433								65736-29	K17-BS-1	37	2017-07-12	18.7833	3582730000	Heizler, M	Sanidine	11	IR1009		129.138.12.160	7.875	Ar40 = L @ 8/7/17 9:44 AM; Ar39 = L @ 8/7/17 9:44 AM; Ar38 = L @ 8/7/17 9:44 AM; Ar37 = L @ 8/7/17 9:44 AM; Ar36 = L @ 8/7/17 9:44 AM; Ar40 = L @ 8/7/17 4:11 PM; Ar39 = L @ 8/7/17 4:11 PM; Ar38 = L @ 8/7/17 4:11 PM; Ar37 = L @ 8/7/17 4:11 PM; Ar36 = L @ 8/7/17 4:11 PM; Ar41 bk val,er = @ 8/7/17 4:17 PM; Average background @ 8/7/17 4:17 PM; Ar40 bk val,er = @ 8/7/17 4:17 PM; Average background @ 8…	N:11	ALLLLLAAAAAA	1	Pychron Script	1	Fusions CO2	4.5	0	0	0	0	30	30	49			0
	55	4.5	7.08755	0.0074045	0.1889	4.30604	68.9046	99.2203	35.3227	0.0122808	0.0018433								65736-55	K17-BS-1	37	2017-07-12	23.4667	3582747000	Heizler, M	Sanidine	11	IR1009		129.138.12.160	7.875	Ar40 = L @ 8/7/17 9:44 AM; Ar39 = L @ 8/7/17 9:44 AM; Ar38 = L @ 8/7/17 9:44 AM; Ar37 = L @ 8/7/17 9:44 AM; Ar36 = L @ 8/7/17 9:44 AM; Ar40 = L @ 8/7/17 4:11 PM; Ar39 = L @ 8/7/17 4:11 PM; Ar38 = L @ 8/7/17 4:11 PM; Ar37 = L @ 8/7/17 4:11 PM; Ar36 = L @ 8/7/17 4:11 PM; Ar41 bk val,er = @ 8/7/17 4:17 PM; Average background @ 8/7/17 4:17 PM; Ar40 bk val,er = @ 8/7/17 4:17 PM; Average background @ 8…	N:11	ALLLLLAAAAAA	1	Pychron Script	1	Fusions CO2	4.5	0	0	0	0	30	30	75			0
	25	5	7.09931	0.0137383	0.0358	3.99901	37.1373	99.8666	35.6092	0.0115099	0.0017491								65736-25	K17-BS-1	37	2017-07-08	13.3667	3582365000	Heizler, M	Sanidine	11	IR1009		129.138.12.160	7.875	Ar40 = P @ 8/7/17 9:42 AM; Ar39 = P @ 8/7/17 9:42 AM; Ar38 = L @ 8/7/17 9:42 AM; Ar37 = L @ 8/7/17 9:42 AM; Ar36 = P @ 8/7/17 9:42 AM; Ar41 bk val,er = @ 8/7/17 2:49 PM; Average background @ 8/7/17 2:49 PM; Ar40 bk val,er = @ 8/7/17 2:49 PM; Average background @ 8/7/17 2:49 PM; Ar39 bk val,er = @ 8/7/17 2:49 PM; Average background @ 8/7/17 2:49 PM; Ar38 bk val,er = @ 8/7/17 2:49 PM; Average backg…	N:11	LPPLLPAAAAAA	1	Pychron Script	1	Fusions CO2	5	0	0	0	0	30	30	180			0
	08	5	7.98008	0.00522	2.5973	0.841579	97.7402	90.3769	36.2222	0.0570677	0.0017491								65736-08	K17-BS-1	37	2017-07-08	9.13333	3582350000	Heizler, M	Sanidine	11	IR1009		129.138.12.160	7.875	Ar40 = P @ 8/7/17 9:42 AM; Ar39 = P @ 8/7/17 9:42 AM; Ar38 = L @ 8/7/17 9:42 AM; Ar37 = L @ 8/7/17 9:42 AM; Ar36 = P @ 8/7/17 9:42 AM; Ar41 bk val,er = @ 8/7/17 2:49 PM; Average background @ 8/7/17 2:49 PM; Ar40 bk val,er = @ 8/7/17 2:49 PM; Average background @ 8/7/17 2:49 PM; Ar39 bk val,er = @ 8/7/17 2:49 PM; Average background @ 8/7/17 2:49 PM; Ar38 bk val,er = @ 8/7/17 2:49 PM; Average backg…	N:11	LPPLLPAAAAAA	1	Pychron Script	1	Fusions CO2	5	0	0	0	0	30	30	163			0
	64	4.5	7.35856	0.004152	0.2147	11.0596	122.882	99.1416	36.6326	0.0066195	0.0018433								65736-64	K17-BS-1	37	2017-07-13	0.916667	3582752000	Heizler, M	Sanidine	11	IR1009		129.138.12.160	7.875	Ar40 = L @ 8/7/17 9:44 AM; Ar39 = L @ 8/7/17 9:44 AM; Ar38 = L @ 8/7/17 9:44 AM; Ar37 = L @ 8/7/17 9:44 AM; Ar36 = L @ 8/7/17 9:44 AM; Ar40 = L @ 8/7/17 4:11 PM; Ar39 = L @ 8/7/17 4:11 PM; Ar38 = L @ 8/7/17 4:11 PM; Ar37 = L @ 8/7/17 4:11 PM; Ar36 = L @ 8/7/17 4:11 PM; Ar41 bk val,er = @ 8/7/17 4:17 PM; Average background @ 8/7/17 4:17 PM; Ar40 bk val,er = @ 8/7/17 4:17 PM; Average background @ 8…	N:11	ALLLLLAAAAAA	1	Pychron Script	1	Fusions CO2	4.5	0	0	0	0	30	30	84			0
	48	4.5	7.34381	0.0045855	0.0469	6.19218	111.265	99.8165	36.8063	0.0084444	0.0018433								65736-48	K17-BS-1	37	2017-07-12	22.0167	3582742000	Heizler, M	Sanidine	11	IR1009		129.138.12.160	7.875	Ar40 = L @ 8/7/17 9:44 AM; Ar39 = L @ 8/7/17 9:44 AM; Ar38 = L @ 8/7/17 9:44 AM; Ar37 = L @ 8/7/17 9:44 AM; Ar36 = L @ 8/7/17 9:44 AM; Ar40 = L @ 8/7/17 4:11 PM; Ar39 = L @ 8/7/17 4:11 PM; Ar38 = L @ 8/7/17 4:11 PM; Ar37 = L @ 8/7/17 4:11 PM; Ar36 = L @ 8/7/17 4:11 PM; Ar41 bk val,er = @ 8/7/17 4:17 PM; Average background @ 8/7/17 4:17 PM; Ar40 bk val,er = @ 8/7/17 4:17 PM; Average background @ 8…	N:11	ALLLLLAAAAAA	1	Pychron Script	1	Fusions CO2	4.5	0	0	0	0	30	30	68			0
	73	4.5	7.69223	0.004297	0.2745	9.78567	118.735	98.9488	38.2048	0.0077152	0.0018433								65736-73	K17-BS-1	37	2017-07-13	2.15	3582757000	Heizler, M	Sanidine	11	IR1009		129.138.12.160	7.875	Ar40 = L @ 8/7/17 9:44 AM; Ar39 = L @ 8/7/17 9:44 AM; Ar38 = L @ 8/7/17 9:44 AM; Ar37 = L @ 8/7/17 9:44 AM; Ar36 = L @ 8/7/17 9:44 AM; Ar40 = L @ 8/7/17 4:11 PM; Ar39 = L @ 8/7/17 4:11 PM; Ar38 = L @ 8/7/17 4:11 PM; Ar37 = L @ 8/7/17 4:11 PM; Ar36 = L @ 8/7/17 4:11 PM; Ar41 bk val,er = @ 8/7/17 4:17 PM; Average background @ 8/7/17 4:17 PM; Ar40 bk val,er = @ 8/7/17 4:17 PM; Average background @ 8…	N:11	ALLLLLAAAAAA	1	Pychron Script	1	Fusions CO2	4.5	0	0	0	0	30	30	93			0
	42	4.5	7.85781	0.0044682	0.5026	5.93792	114.186	98.1125	38.6931	0.0121186	0.0018433								65736-42	K17-BS-1	37	2017-07-12	21.35	3582739000	Heizler, M	Sanidine	11	IR1009		129.138.12.160	7.875	Ar40 = L @ 8/7/17 9:44 AM; Ar39 = L @ 8/7/17 9:44 AM; Ar38 = L @ 8/7/17 9:44 AM; Ar37 = L @ 8/7/17 9:44 AM; Ar36 = L @ 8/7/17 9:44 AM; Ar40 = L @ 8/7/17 4:11 PM; Ar39 = L @ 8/7/17 4:11 PM; Ar38 = L @ 8/7/17 4:11 PM; Ar37 = L @ 8/7/17 4:11 PM; Ar36 = L @ 8/7/17 4:11 PM; Ar41 bk val,er = @ 8/7/17 4:17 PM; Average background @ 8/7/17 4:17 PM; Ar40 bk val,er = @ 8/7/17 4:17 PM; Average background @ 8…	N:11	ALLLLLAAAAAA	1	Pychron Script	1	Fusions CO2	4.5	0	0	0	0	30	30	62			0
	56	4.5	8.05148	0.0068576	0.3453	6.29862	74.3998	98.7384	39.8877	0.0103174	0.0018433								65736-56	K17-BS-1	37	2017-07-12	23.5667	3582747000	Heizler, M	Sanidine	11	IR1009		129.138.12.160	7.875	Ar40 = L @ 8/7/17 9:44 AM; Ar39 = L @ 8/7/17 9:44 AM; Ar38 = L @ 8/7/17 9:44 AM; Ar37 = L @ 8/7/17 9:44 AM; Ar36 = L @ 8/7/17 9:44 AM; Ar40 = L @ 8/7/17 4:11 PM; Ar39 = L @ 8/7/17 4:11 PM; Ar38 = L @ 8/7/17 4:11 PM; Ar37 = L @ 8/7/17 4:11 PM; Ar36 = L @ 8/7/17 4:11 PM; Ar41 bk val,er = @ 8/7/17 4:17 PM; Average background @ 8/7/17 4:17 PM; Ar40 bk val,er = @ 8/7/17 4:17 PM; Average background @ 8…	N:11	ALLLLLAAAAAA	1	Pychron Script	1	Fusions CO2	4.5	0	0	0	0	30	30	76			0
	18	5	8.03271	0.0072034	0.0955	4.98696	70.8282	99.6555	40.1613	0.0105352	0.0017491								65736-18	K17-BS-1	37	2017-07-08	11.8833	3582360000	Heizler, M	Sanidine	11	IR1009		129.138.12.160	7.875	Ar40 = P @ 8/7/17 9:42 AM; Ar39 = P @ 8/7/17 9:42 AM; Ar38 = L @ 8/7/17 9:42 AM; Ar37 = L @ 8/7/17 9:42 AM; Ar36 = P @ 8/7/17 9:42 AM; Ar41 bk val,er = @ 8/7/17 2:49 PM; Average background @ 8/7/17 2:49 PM; Ar40 bk val,er = @ 8/7/17 2:49 PM; Average background @ 8/7/17 2:49 PM; Ar39 bk val,er = @ 8/7/17 2:49 PM; Average background @ 8/7/17 2:49 PM; Ar38 bk val,er = @ 8/7/17 2:49 PM; Average backg…	N:11	LPPLLPAAAAAA	1	Pychron Script	1	Fusions CO2	5	0	0	0	0	30	30	173			0
	53	4.5	8.86031	0.0302756	1.7894	0.257275	16.852	94.054	41.7953	0.143973	0.0018433								65736-53	K17-BS-1	37	2017-07-12	23	3582745000	Heizler, M	Sanidine	11	IR1009		129.138.12.160	7.875	Ar40 = L @ 8/7/17 9:44 AM; Ar39 = L @ 8/7/17 9:44 AM; Ar38 = L @ 8/7/17 9:44 AM; Ar37 = L @ 8/7/17 9:44 AM; Ar36 = L @ 8/7/17 9:44 AM; Ar40 = L @ 8/7/17 4:11 PM; Ar39 = L @ 8/7/17 4:11 PM; Ar38 = L @ 8/7/17 4:11 PM; Ar37 = L @ 8/7/17 4:11 PM; Ar36 = L @ 8/7/17 4:11 PM; Ar41 bk val,er = @ 8/7/17 4:17 PM; Average background @ 8/7/17 4:17 PM; Ar40 bk val,er = @ 8/7/17 4:17 PM; Average background @ 8…	N:11	ALLLLLAAAAAA	1	Pychron Script	1	Fusions CO2	4.5	0	0	0	0	30	30	73			0
	22	5	8.52854	0.0062952	0.6313	2.71036	81.0465	97.8164	41.8368	0.0186763	0.0017491								65736-22	K17-BS-1	37	2017-07-08	12.7333	3582363000	Heizler, M	Sanidine	11	IR1009		129.138.12.160	7.875	Ar40 = P @ 8/7/17 9:42 AM; Ar39 = P @ 8/7/17 9:42 AM; Ar38 = L @ 8/7/17 9:42 AM; Ar37 = L @ 8/7/17 9:42 AM; Ar36 = P @ 8/7/17 9:42 AM; Ar41 bk val,er = @ 8/7/17 2:49 PM; Average background @ 8/7/17 2:49 PM; Ar40 bk val,er = @ 8/7/17 2:49 PM; Average background @ 8/7/17 2:49 PM; Ar39 bk val,er = @ 8/7/17 2:49 PM; Average background @ 8/7/17 2:49 PM; Ar38 bk val,er = @ 8/7/17 2:49 PM; Average backg…	N:11	LPPLLPAAAAAA	1	Pychron Script	1	Fusions CO2	5	0	0	0	0	30	30	177			0
	46	4.5	8.42687	0.0033427	0.1046	4.14799	152.632	99.6362	42.1034	0.012359	0.0018433								65736-46	K17-BS-1	37	2017-07-12	21.8	3582741000	Heizler, M	Sanidine	11	IR1009		129.138.12.160	7.875	Ar40 = L @ 8/7/17 9:44 AM; Ar39 = L @ 8/7/17 9:44 AM; Ar38 = L @ 8/7/17 9:44 AM; Ar37 = L @ 8/7/17 9:44 AM; Ar36 = L @ 8/7/17 9:44 AM; Ar40 = L @ 8/7/17 4:11 PM; Ar39 = L @ 8/7/17 4:11 PM; Ar38 = L @ 8/7/17 4:11 PM; Ar37 = L @ 8/7/17 4:11 PM; Ar36 = L @ 8/7/17 4:11 PM; Ar41 bk val,er = @ 8/7/17 4:17 PM; Average background @ 8/7/17 4:17 PM; Ar40 bk val,er = @ 8/7/17 4:17 PM; Average background @ 8…	N:11	ALLLLLAAAAAA	1	Pychron Script	1	Fusions CO2	4.5	0	0	0	0	30	30	66			0
	67	4.5	8.48772	0.0040076	0.0652	4.50603	127.309	99.7768	42.4635	0.011437	0.0018433								65736-67	K17-BS-1	37	2017-07-13	1.48333	3582754000	Heizler, M	Sanidine	11	IR1009		129.138.12.160	7.875	Ar40 = L @ 8/7/17 9:44 AM; Ar39 = L @ 8/7/17 9:44 AM; Ar38 = L @ 8/7/17 9:44 AM; Ar37 = L @ 8/7/17 9:44 AM; Ar36 = L @ 8/7/17 9:44 AM; Ar40 = L @ 8/7/17 4:11 PM; Ar39 = L @ 8/7/17 4:11 PM; Ar38 = L @ 8/7/17 4:11 PM; Ar37 = L @ 8/7/17 4:11 PM; Ar36 = L @ 8/7/17 4:11 PM; Ar41 bk val,er = @ 8/7/17 4:17 PM; Average background @ 8/7/17 4:17 PM; Ar40 bk val,er = @ 8/7/17 4:17 PM; Average background @ 8…	N:11	ALLLLLAAAAAA	1	Pychron Script	1	Fusions CO2	4.5	0	0	0	0	30	30	87			0
	72	4.5	8.58802	0.0054193	0.349	2.57766	94.1457	98.8032	42.5456	0.0180098	0.0018433								65736-72	K17-BS-1	37	2017-07-13	2.03333	3582756000	Heizler, M	Sanidine	11	IR1009		129.138.12.160	7.875	Ar40 = L @ 8/7/17 9:44 AM; Ar39 = L @ 8/7/17 9:44 AM; Ar38 = L @ 8/7/17 9:44 AM; Ar37 = L @ 8/7/17 9:44 AM; Ar36 = L @ 8/7/17 9:44 AM; Ar40 = L @ 8/7/17 4:11 PM; Ar39 = L @ 8/7/17 4:11 PM; Ar38 = L @ 8/7/17 4:11 PM; Ar37 = L @ 8/7/17 4:11 PM; Ar36 = L @ 8/7/17 4:11 PM; Ar41 bk val,er = @ 8/7/17 4:17 PM; Average background @ 8/7/17 4:17 PM; Ar40 bk val,er = @ 8/7/17 4:17 PM; Average background @ 8…	N:11	ALLLLLAAAAAA	1	Pychron Script	1	Fusions CO2	4.5	0	0	0	0	30	30	92			0
	52	4.5	8.92679	0.0027568	0.4133	4.37629	185.071	98.6333	44.1303	0.0135351	0.0018433								65736-52	K17-BS-1	37	2017-07-12	22.6833	3582744000	Heizler, M	Sanidine	11	IR1009		129.138.12.160	7.875	Ar40 = L @ 8/7/17 9:44 AM; Ar39 = L @ 8/7/17 9:44 AM; Ar38 = L @ 8/7/17 9:44 AM; Ar37 = L @ 8/7/17 9:44 AM; Ar36 = L @ 8/7/17 9:44 AM; Ar40 = L @ 8/7/17 4:11 PM; Ar39 = L @ 8/7/17 4:11 PM; Ar38 = L @ 8/7/17 4:11 PM; Ar37 = L @ 8/7/17 4:11 PM; Ar36 = L @ 8/7/17 4:11 PM; Ar41 bk val,er = @ 8/7/17 4:17 PM; Average background @ 8/7/17 4:17 PM; Ar40 bk val,er = @ 8/7/17 4:17 PM; Average background @ 8…	N:11	ALLLLLAAAAAA	1	Pychron Script	1	Fusions CO2	4.5	0	0	0	0	30	30	72			0
	51	4.5	9.48643	0.008669	1.9753	1.57494	58.8538	93.849	44.6189	0.0378043	0.0018433								65736-51	K17-BS-1	37	2017-07-12	22.5667	3582744000	Heizler, M	Sanidine	11	IR1009		129.138.12.160	7.875	Ar40 = L @ 8/7/17 9:44 AM; Ar39 = L @ 8/7/17 9:44 AM; Ar38 = L @ 8/7/17 9:44 AM; Ar37 = L @ 8/7/17 9:44 AM; Ar36 = L @ 8/7/17 9:44 AM; Ar40 = L @ 8/7/17 4:11 PM; Ar39 = L @ 8/7/17 4:11 PM; Ar38 = L @ 8/7/17 4:11 PM; Ar37 = L @ 8/7/17 4:11 PM; Ar36 = L @ 8/7/17 4:11 PM; Ar41 bk val,er = @ 8/7/17 4:17 PM; Average background @ 8/7/17 4:17 PM; Ar40 bk val,er = @ 8/7/17 4:17 PM; Average background @ 8…	N:11	ALLLLLAAAAAA	1	Pychron Script	1	Fusions CO2	4.5	0	0	0	0	30	30	71			0
	57	4.5	9.12265	0.023364	0.6139	1.17286	21.8372	98.0307	44.8162	0.037938	0.0018433								65736-57	K17-BS-1	37	2017-07-12	23.7	3582748000	Heizler, M	Sanidine	11	IR1009		129.138.12.160	7.875	Ar40 = L @ 8/7/17 9:44 AM; Ar39 = L @ 8/7/17 9:44 AM; Ar38 = L @ 8/7/17 9:44 AM; Ar37 = L @ 8/7/17 9:44 AM; Ar36 = L @ 8/7/17 9:44 AM; Ar40 = L @ 8/7/17 4:11 PM; Ar39 = L @ 8/7/17 4:11 PM; Ar38 = L @ 8/7/17 4:11 PM; Ar37 = L @ 8/7/17 4:11 PM; Ar36 = L @ 8/7/17 4:11 PM; Ar41 bk val,er = @ 8/7/17 4:17 PM; Average background @ 8/7/17 4:17 PM; Ar40 bk val,er = @ 8/7/17 4:17 PM; Average background @ 8…	N:11	ALLLLLAAAAAA	1	Pychron Script	1	Fusions CO2	4.5	0	0	0	0	30	30	77			0
	27	5	11.5145	0.0151816	7.3589	5.13407	33.6067	81.111	46.7872	0.0303202	0.0017491								65736-27	K17-BS-1	37	2017-07-08	14.6667	3582370000	Heizler, M	Sanidine	11	IR1009		129.138.12.160	7.875	Ar40 = P @ 8/7/17 9:42 AM; Ar39 = P @ 8/7/17 9:42 AM; Ar38 = L @ 8/7/17 9:42 AM; Ar37 = L @ 8/7/17 9:42 AM; Ar36 = P @ 8/7/17 9:42 AM; Ar41 bk val,er = @ 8/7/17 2:49 PM; Average background @ 8/7/17 2:49 PM; Ar40 bk val,er = @ 8/7/17 2:49 PM; Average background @ 8/7/17 2:49 PM; Ar39 bk val,er = @ 8/7/17 2:49 PM; Average background @ 8/7/17 2:49 PM; Ar38 bk val,er = @ 8/7/17 2:49 PM; Average backg…	N:11	LPPLLPAAAAAA	1	Pychron Script	1	Fusions CO2	5	0	0	0	0	30	30	182			0
	15	5	9.66385	0.0055278	0.6329	0.686424	92.2978	98.0676	47.4603	0.0630855	0.0017491								65736-15	K17-BS-1	37	2017-07-08	11.0333	3582357000	Heizler, M	Sanidine	11	IR1009		129.138.12.160	7.875	Ar40 = P @ 8/7/17 9:42 AM; Ar39 = P @ 8/7/17 9:42 AM; Ar38 = L @ 8/7/17 9:42 AM; Ar37 = L @ 8/7/17 9:42 AM; Ar36 = P @ 8/7/17 9:42 AM; Ar41 bk val,er = @ 8/7/17 2:49 PM; Average background @ 8/7/17 2:49 PM; Ar40 bk val,er = @ 8/7/17 2:49 PM; Average background @ 8/7/17 2:49 PM; Ar39 bk val,er = @ 8/7/17 2:49 PM; Average background @ 8/7/17 2:49 PM; Ar38 bk val,er = @ 8/7/17 2:49 PM; Average backg…	N:11	LPPLLPAAAAAA	1	Pychron Script	1	Fusions CO2	5	0	0	0	0	30	30	170			0
	02	5	10.1596	0.0087329	1.778	3.77711	58.4232	94.8309	48.24	0.0184384	0.0017491								65736-02	K17-BS-1	37	2017-07-08	7.4	3582343000	Heizler, M	Sanidine	11	IR1009		129.138.12.160	7.875	Ar40 = P @ 8/7/17 9:42 AM; Ar39 = P @ 8/7/17 9:42 AM; Ar38 = L @ 8/7/17 9:42 AM; Ar37 = L @ 8/7/17 9:42 AM; Ar36 = P @ 8/7/17 9:42 AM; Ar41 bk val,er = @ 8/7/17 2:49 PM; Average background @ 8/7/17 2:49 PM; Ar40 bk val,er = @ 8/7/17 2:49 PM; Average background @ 8/7/17 2:49 PM; Ar39 bk val,er = @ 8/7/17 2:49 PM; Average background @ 8/7/17 2:49 PM; Ar38 bk val,er = @ 8/7/17 2:49 PM; Average backg…	N:11	LPPLLPAAAAAA	1	Pychron Script	1	Fusions CO2	5	0	0	0	0	30	30	157			0
	62	4.5	9.66703	0.0269204	0.0711	2.74688	18.9523	99.8051	48.3066	0.0199215	0.0018433								65736-62	K17-BS-1	37	2017-07-13	0.483333	3582751000	Heizler, M	Sanidine	11	IR1009		129.138.12.160	7.875	Ar40 = L @ 8/7/17 9:44 AM; Ar39 = L @ 8/7/17 9:44 AM; Ar38 = L @ 8/7/17 9:44 AM; Ar37 = L @ 8/7/17 9:44 AM; Ar36 = L @ 8/7/17 9:44 AM; Ar40 = L @ 8/7/17 4:11 PM; Ar39 = L @ 8/7/17 4:11 PM; Ar38 = L @ 8/7/17 4:11 PM; Ar37 = L @ 8/7/17 4:11 PM; Ar36 = L @ 8/7/17 4:11 PM; Ar41 bk val,er = @ 8/7/17 4:17 PM; Average background @ 8/7/17 4:17 PM; Ar40 bk val,er = @ 8/7/17 4:17 PM; Average background @ 8…	N:11	ALLLLLAAAAAA	1	Pychron Script	1	Fusions CO2	4.5	0	0	0	0	30	30	82			0
	04	5	14.9941	0.0036632	0.2366	0.817859	139.278	99.5355	74.2168	0.0637859	0.0017491								65736-04	K17-BS-1	37	2017-07-08	7.81667	3582345000	Heizler, M	Sanidine	11	IR1009		129.138.12.160	7.875	Ar40 = P @ 8/7/17 9:42 AM; Ar39 = P @ 8/7/17 9:42 AM; Ar38 = L @ 8/7/17 9:42 AM; Ar37 = L @ 8/7/17 9:42 AM; Ar36 = P @ 8/7/17 9:42 AM; Ar41 bk val,er = @ 8/7/17 2:49 PM; Average background @ 8/7/17 2:49 PM; Ar40 bk val,er = @ 8/7/17 2:49 PM; Average background @ 8/7/17 2:49 PM; Ar39 bk val,er = @ 8/7/17 2:49 PM; Average background @ 8/7/17 2:49 PM; Ar38 bk val,er = @ 8/7/17 2:49 PM; Average backg…	N:11	LPPLLPAAAAAA	1	Pychron Script	1	Fusions CO2	5	0	0	0	0	30	30	159			0
	58	4.5	16.6977	0.0038704	0.082	9.12162	131.822	99.8568	82.727	0.011897	0.0018433								65736-58	K17-BS-1	37	2017-07-12	23.8	3582748000	Heizler, M	Sanidine	11	IR1009		129.138.12.160	7.875	Ar40 = L @ 8/7/17 9:44 AM; Ar39 = L @ 8/7/17 9:44 AM; Ar38 = L @ 8/7/17 9:44 AM; Ar37 = L @ 8/7/17 9:44 AM; Ar36 = L @ 8/7/17 9:44 AM; Ar40 = L @ 8/7/17 4:11 PM; Ar39 = L @ 8/7/17 4:11 PM; Ar38 = L @ 8/7/17 4:11 PM; Ar37 = L @ 8/7/17 4:11 PM; Ar36 = L @ 8/7/17 4:11 PM; Ar41 bk val,er = @ 8/7/17 4:17 PM; Average background @ 8/7/17 4:17 PM; Ar40 bk val,er = @ 8/7/17 4:17 PM; Average background @ 8…	N:11	ALLLLLAAAAAA	1	Pychron Script	1	Fusions CO2	4.5	0	0	0	0	30	30	78			0
	20	5	33.3619	0.0083885	1.4362	2.42132	60.8218	98.7296	160.014	0.0481549	0.0017491								65736-20	K17-BS-1	37	2017-07-08	12.3	3582361000	Heizler, M	Sanidine	11	IR1009		129.138.12.160	7.875	Ar40 = P @ 8/7/17 9:42 AM; Ar39 = P @ 8/7/17 9:42 AM; Ar38 = L @ 8/7/17 9:42 AM; Ar37 = L @ 8/7/17 9:42 AM; Ar36 = P @ 8/7/17 9:42 AM; Ar41 bk val,er = @ 8/7/17 2:49 PM; Average background @ 8/7/17 2:49 PM; Ar40 bk val,er = @ 8/7/17 2:49 PM; Average background @ 8/7/17 2:49 PM; Ar39 bk val,er = @ 8/7/17 2:49 PM; Average background @ 8/7/17 2:49 PM; Ar38 bk val,er = @ 8/7/17 2:49 PM; Average backg…	N:11	LPPLLPAAAAAA	1	Pychron Script	1	Fusions CO2	5	0	0	0	0	30	30	175			0
	39	4.5	36.5861	0.0076663	0.85	3.38235	66.5515	99.315	175.753	0.0488614	0.0018433								65736-39	K17-BS-1	37	2017-07-12	20.1333	3582735000	Heizler, M	Sanidine	11	IR1009		129.138.12.160	7.875	Ar40 = L @ 8/7/17 9:44 AM; Ar39 = L @ 8/7/17 9:44 AM; Ar38 = L @ 8/7/17 9:44 AM; Ar37 = L @ 8/7/17 9:44 AM; Ar36 = L @ 8/7/17 9:44 AM; Ar40 = L @ 8/7/17 4:11 PM; Ar39 = L @ 8/7/17 4:11 PM; Ar38 = L @ 8/7/17 4:11 PM; Ar37 = L @ 8/7/17 4:11 PM; Ar36 = L @ 8/7/17 4:11 PM; Ar41 bk val,er = @ 8/7/17 4:17 PM; Average background @ 8/7/17 4:17 PM; Ar40 bk val,er = @ 8/7/17 4:17 PM; Average background @ 8…	N:11	ALLLLLAAAAAA	1	Pychron Script	1	Fusions CO2	4.5	0	0	0	0	30	30	59			0
	50	4.5	43.8404	-0.0060691	0.2806	0.678885	-	99.8097	209.671	0.197751	0.0018433								65736-50	K17-BS-1	37	2017-07-12	22.4667	3582743000	Heizler, M	Sanidine	11	IR1009		129.138.12.160	7.875	Ar40 = L @ 8/7/17 9:44 AM; Ar39 = L @ 8/7/17 9:44 AM; Ar38 = L @ 8/7/17 9:44 AM; Ar37 = L @ 8/7/17 9:44 AM; Ar36 = L @ 8/7/17 9:44 AM; Ar40 = L @ 8/7/17 4:11 PM; Ar39 = L @ 8/7/17 4:11 PM; Ar38 = L @ 8/7/17 4:11 PM; Ar37 = L @ 8/7/17 4:11 PM; Ar36 = L @ 8/7/17 4:11 PM; Ar41 bk val,er = @ 8/7/17 4:17 PM; Average background @ 8/7/17 4:17 PM; Ar40 bk val,er = @ 8/7/17 4:17 PM; Average background @ 8…	N:11	ALLLLLAAAAAA	1	Pychron Script	1	Fusions CO2	4.5	0	0	0	0	30	30	70			0
	11	5	50.7947	0.0066858	0.449	1.50378	76.3116	99.7398	240.68	0.0939876	0.0017491								65736-11	K17-BS-1	37	2017-07-08	9.98333	3582353000	Heizler, M	Sanidine	11	IR1009		129.138.12.160	7.875	Ar40 = P @ 8/7/17 9:42 AM; Ar39 = P @ 8/7/17 9:42 AM; Ar38 = L @ 8/7/17 9:42 AM; Ar37 = L @ 8/7/17 9:42 AM; Ar36 = P @ 8/7/17 9:42 AM; Ar41 bk val,er = @ 8/7/17 2:49 PM; Average background @ 8/7/17 2:49 PM; Ar40 bk val,er = @ 8/7/17 2:49 PM; Average background @ 8/7/17 2:49 PM; Ar39 bk val,er = @ 8/7/17 2:49 PM; Average background @ 8/7/17 2:49 PM; Ar38 bk val,er = @ 8/7/17 2:49 PM; Average backg…	N:11	LPPLLPAAAAAA	1	Pychron Script	1	Fusions CO2	5	0	0	0	0	30	30	166			0
				n=73
	K17-BS-1, Sanidine, J=0.0027748±0.02%, IC=1.001094±0.0018433, NM-290N, Lab#=65737, Argus VI
	78	4.5	1.19644	0.0088246	0.9579	5.87164	57.8161	76.2285	4.59262	0.0116995	0.0018433								65737-78	K17-BS-1	37	2017-07-13	16.0833	3582807000	Heizler, M	Sanidine	12	IR1009		129.138.12.160	7.875	Ar40 = L @ 8/7/17 9:45 AM; Ar39 = L @ 8/7/17 9:45 AM; Ar38 = L @ 8/7/17 9:45 AM; Ar37 = L @ 8/7/17 9:45 AM; Ar36 = L @ 8/7/17 9:45 AM; Ar40 = L @ 8/7/17 4:12 PM; Ar39 = L @ 8/7/17 4:12 PM; Ar38 = L @ 8/7/17 4:12 PM; Ar37 = L @ 8/7/17 4:12 PM; Ar36 = L @ 8/7/17 4:12 PM; Ar41 bk val,er = @ 8/7/17 4:17 PM; Average background @ 8/7/17 4:17 PM; Ar40 bk val,er = @ 8/7/17 4:17 PM; Average background @ 8…	N:12	ALLLLLAAAAAA	1	Pychron Script	1	Fusions CO2	4.5	0	0	0	0	30	30	171			0
	71	4.5	1.41951	0.0056643	0.2535	3.28822	90.0736	94.7227	6.77468	0.0101164	0.0018433								65737-71	K17-BS-1	37	2017-07-13	14.8833	3582802000	Heizler, M	Sanidine	12	IR1009		129.138.12.160	7.875	Ar40 = L @ 8/7/17 9:45 AM; Ar39 = L @ 8/7/17 9:45 AM; Ar38 = L @ 8/7/17 9:45 AM; Ar37 = L @ 8/7/17 9:45 AM; Ar36 = L @ 8/7/17 9:45 AM; Ar40 = L @ 8/7/17 4:12 PM; Ar39 = L @ 8/7/17 4:12 PM; Ar38 = L @ 8/7/17 4:12 PM; Ar37 = L @ 8/7/17 4:12 PM; Ar36 = L @ 8/7/17 4:12 PM; Ar41 bk val,er = @ 8/7/17 4:17 PM; Average background @ 8/7/17 4:17 PM; Ar40 bk val,er = @ 8/7/17 4:17 PM; Average background @ 8…	N:12	ALLLLLAAAAAA	1	Pychron Script	1	Fusions CO2	4.5	0	0	0	0	30	30	164			0
	55	4.5	1.65965	0.0115618	0.7596	6.31636	44.1284	86.4601	7.23549	0.0099218	0.0018433								65737-55	K17-BS-1	37	2017-07-13	12.2167	3582793000	Heizler, M	Sanidine	12	IR1009		129.138.12.160	7.875	Ar40 = L @ 8/7/17 9:45 AM; Ar39 = L @ 8/7/17 9:45 AM; Ar38 = L @ 8/7/17 9:45 AM; Ar37 = L @ 8/7/17 9:45 AM; Ar36 = L @ 8/7/17 9:45 AM; Ar40 = L @ 8/7/17 4:12 PM; Ar39 = L @ 8/7/17 4:12 PM; Ar38 = L @ 8/7/17 4:12 PM; Ar37 = L @ 8/7/17 4:12 PM; Ar36 = L @ 8/7/17 4:12 PM; Ar41 bk val,er = @ 8/7/17 4:17 PM; Average background @ 8/7/17 4:17 PM; Ar40 bk val,er = @ 8/7/17 4:17 PM; Average background @ 8…	N:12	ALLLLLAAAAAA	1	Pychron Script	1	Fusions CO2	4.5	0	0	0	0	30	30	148			0
	75	4.5	2.26287	-0.0001494	2.5995	0.512362	-	65.921	7.53177	0.0680383	0.0018433								65737-75	K17-BS-1	37	2017-07-13	15.5333	3582805000	Heizler, M	Sanidine	12	IR1009		129.138.12.160	7.875	Ar40 = L @ 8/7/17 9:45 AM; Ar39 = L @ 8/7/17 9:45 AM; Ar38 = L @ 8/7/17 9:45 AM; Ar37 = L @ 8/7/17 9:45 AM; Ar36 = L @ 8/7/17 9:45 AM; Ar40 = L @ 8/7/17 4:12 PM; Ar39 = L @ 8/7/17 4:12 PM; Ar38 = L @ 8/7/17 4:12 PM; Ar37 = L @ 8/7/17 4:12 PM; Ar36 = L @ 8/7/17 4:12 PM; Ar41 bk val,er = @ 8/7/17 4:17 PM; Average background @ 8/7/17 4:17 PM; Ar40 bk val,er = @ 8/7/17 4:17 PM; Average background @ 8…	N:12	ALLLLLAAAAAA	1	Pychron Script	1	Fusions CO2	4.5	0	0	0	0	30	30	168			0
	39	4.5	2.01368	0.0043501	0.8211	3.81134	117.286	87.9152	8.93088	0.0137075	0.0018433								65737-39	K17-BS-1	37	2017-07-13	9.53333	3582783000	Heizler, M	Sanidine	12	IR1009		129.138.12.160	7.875	Ar40 = L @ 8/7/17 9:45 AM; Ar39 = L @ 8/7/17 9:45 AM; Ar38 = L @ 8/7/17 9:45 AM; Ar37 = L @ 8/7/17 9:45 AM; Ar36 = L @ 8/7/17 9:45 AM; Ar40 = L @ 8/7/17 4:11 PM; Ar39 = L @ 8/7/17 4:11 PM; Ar38 = L @ 8/7/17 4:11 PM; Ar37 = L @ 8/7/17 4:11 PM; Ar36 = L @ 8/7/17 4:11 PM; Ar41 bk val,er = @ 8/7/17 4:17 PM; Average background @ 8/7/17 4:17 PM; Ar40 bk val,er = @ 8/7/17 4:17 PM; Average background @ 8…	N:12	ALLLLLAAAAAA	1	Pychron Script	1	Fusions CO2	4.5	0	0	0	0	30	30	132			0
	36	4.5	2.09463	0.0087106	0.1505	4.72036	58.5728	97.902	10.343	0.0081602	0.0018433								65737-36	K17-BS-1	37	2017-07-13	9.2	3582782000	Heizler, M	Sanidine	12	IR1009		129.138.12.160	7.875	Ar40 = L @ 8/7/17 9:45 AM; Ar39 = L @ 8/7/17 9:45 AM; Ar38 = L @ 8/7/17 9:45 AM; Ar37 = L @ 8/7/17 9:45 AM; Ar36 = L @ 8/7/17 9:45 AM; Ar40 = L @ 8/7/17 4:11 PM; Ar39 = L @ 8/7/17 4:11 PM; Ar38 = L @ 8/7/17 4:11 PM; Ar37 = L @ 8/7/17 4:11 PM; Ar36 = L @ 8/7/17 4:11 PM; Ar41 bk val,er = @ 8/7/17 4:17 PM; Average background @ 8/7/17 4:17 PM; Ar40 bk val,er = @ 8/7/17 4:17 PM; Average background @ 8…	N:12	ALLLLLAAAAAA	1	Pychron Script	1	Fusions CO2	4.5	0	0	0	0	30	30	129			0
	22	4.5	2.81506	0.0189454	0.4517	3.21158	26.9302	95.2983	13.5336	0.0121131	0.0018433								65737-22	K17-BS-1	37	2017-07-13	5.91667	3582770000	Heizler, M	Sanidine	12	IR1009		129.138.12.160	7.875	Ar40 = L @ 8/7/17 9:45 AM; Ar39 = L @ 8/7/17 9:45 AM; Ar38 = L @ 8/7/17 9:45 AM; Ar37 = L @ 8/7/17 9:45 AM; Ar36 = L @ 8/7/17 9:45 AM; Ar40 = L @ 8/7/17 4:11 PM; Ar39 = L @ 8/7/17 4:11 PM; Ar38 = L @ 8/7/17 4:11 PM; Ar37 = L @ 8/7/17 4:11 PM; Ar36 = L @ 8/7/17 4:11 PM; Ar41 bk val,er = @ 8/7/17 4:17 PM; Average background @ 8/7/17 4:17 PM; Ar40 bk val,er = @ 8/7/17 4:17 PM; Average background @ 8…	N:12	ALLLLLAAAAAA	1	Pychron Script	1	Fusions CO2	4.5	0	0	0	0	30	30	115			0
	66	4.5	3.2373	0.0081457	0.0605	1.82037	62.6348	99.4673	16.2389	0.0137433	0.0018433								65737-66	K17-BS-1	37	2017-07-13	14.0833	3582800000	Heizler, M	Sanidine	12	IR1009		129.138.12.160	7.875	Ar40 = L @ 8/7/17 9:45 AM; Ar39 = L @ 8/7/17 9:45 AM; Ar38 = L @ 8/7/17 9:45 AM; Ar37 = L @ 8/7/17 9:45 AM; Ar36 = L @ 8/7/17 9:45 AM; Ar40 = L @ 8/7/17 4:12 PM; Ar39 = L @ 8/7/17 4:12 PM; Ar38 = L @ 8/7/17 4:12 PM; Ar37 = L @ 8/7/17 4:12 PM; Ar36 = L @ 8/7/17 4:12 PM; Ar41 bk val,er = @ 8/7/17 4:17 PM; Average background @ 8/7/17 4:17 PM; Ar40 bk val,er = @ 8/7/17 4:17 PM; Average background @ 8…	N:12	ALLLLLAAAAAA	1	Pychron Script	1	Fusions CO2	4.5	0	0	0	0	30	30	159			0
	03	4.5	4.10469	0.0041267	0.2316	4.61079	123.635	98.3375	20.3448	0.0088763	0.0018433								65737-03	K17-BS-1	37	2017-07-13	2.5	3582758000	Heizler, M	Sanidine	12	IR1009		129.138.12.160	7.875	Ar40 = L @ 8/7/17 9:44 AM; Ar39 = L @ 8/7/17 9:44 AM; Ar38 = L @ 8/7/17 9:44 AM; Ar37 = L @ 8/7/17 9:44 AM; Ar36 = L @ 8/7/17 9:44 AM; Ar40 = L @ 8/7/17 4:11 PM; Ar39 = L @ 8/7/17 4:11 PM; Ar38 = L @ 8/7/17 4:11 PM; Ar37 = L @ 8/7/17 4:11 PM; Ar36 = L @ 8/7/17 4:11 PM; Ar41 bk val,er = @ 8/7/17 4:17 PM; Average background @ 8/7/17 4:17 PM; Ar40 bk val,er = @ 8/7/17 4:17 PM; Average background @ 8…	N:12	ALLLLLAAAAAA	1	Pychron Script	1	Fusions CO2	4.5	0	0	0	0	30	30	96			0
	81	4.5	4.60999	0.0061318	0.2804	10.7975	83.2062	98.2102	22.8097	0.0057554	0.0018433								65737-81	K17-BS-1	37	2017-07-13	16.4333	3582808000	Heizler, M	Sanidine	12	IR1009		129.138.12.160	7.875	Ar40 = L @ 8/7/17 9:45 AM; Ar39 = L @ 8/7/17 9:45 AM; Ar38 = L @ 8/7/17 9:45 AM; Ar37 = L @ 8/7/17 9:45 AM; Ar36 = L @ 8/7/17 9:45 AM; Ar40 = L @ 8/7/17 4:12 PM; Ar39 = L @ 8/7/17 4:12 PM; Ar38 = L @ 8/7/17 4:12 PM; Ar37 = L @ 8/7/17 4:12 PM; Ar36 = L @ 8/7/17 4:12 PM; Ar41 bk val,er = @ 8/7/17 4:17 PM; Average background @ 8/7/17 4:17 PM; Ar40 bk val,er = @ 8/7/17 4:17 PM; Average background @ 8…	N:12	ALLLLLAAAAAA	1	Pychron Script	1	Fusions CO2	4.5	0	0	0	0	30	30	174			0
	63	4.5	4.79578	0.0237468	0.6438	2.5763	21.4852	96.0659	23.2104	0.0167322	0.0018433								65737-63	K17-BS-1	37	2017-07-13	13.3167	3582797000	Heizler, M	Sanidine	12	IR1009		129.138.12.160	7.875	Ar40 = L @ 8/7/17 9:45 AM; Ar39 = L @ 8/7/17 9:45 AM; Ar38 = L @ 8/7/17 9:45 AM; Ar37 = L @ 8/7/17 9:45 AM; Ar36 = L @ 8/7/17 9:45 AM; Ar40 = L @ 8/7/17 4:12 PM; Ar39 = L @ 8/7/17 4:12 PM; Ar38 = L @ 8/7/17 4:12 PM; Ar37 = L @ 8/7/17 4:12 PM; Ar36 = L @ 8/7/17 4:12 PM; Ar41 bk val,er = @ 8/7/17 4:17 PM; Average background @ 8/7/17 4:17 PM; Ar40 bk val,er = @ 8/7/17 4:17 PM; Average background @ 8…	N:12	ALLLLLAAAAAA	1	Pychron Script	1	Fusions CO2	4.5	0	0	0	0	30	30	156			0
	49	4.5	5.34813	0.0217169	1.5385	1.67953	23.4934	91.5186	24.6533	0.0342317	0.0018433								65737-49	K17-BS-1	37	2017-07-13	11.3167	3582790000	Heizler, M	Sanidine	12	IR1009		129.138.12.160	7.875	Ar40 = L @ 8/7/17 9:45 AM; Ar39 = L @ 8/7/17 9:45 AM; Ar38 = L @ 8/7/17 9:45 AM; Ar37 = L @ 8/7/17 9:45 AM; Ar36 = L @ 8/7/17 9:45 AM; Ar40 = L @ 8/7/17 4:12 PM; Ar39 = L @ 8/7/17 4:12 PM; Ar38 = L @ 8/7/17 4:12 PM; Ar37 = L @ 8/7/17 4:12 PM; Ar36 = L @ 8/7/17 4:12 PM; Ar41 bk val,er = @ 8/7/17 4:17 PM; Average background @ 8/7/17 4:17 PM; Ar40 bk val,er = @ 8/7/17 4:17 PM; Average background @ 8…	N:12	ALLLLLAAAAAA	1	Pychron Script	1	Fusions CO2	4.5	0	0	0	0	30	30	142			0
	64	4.5	5.0765	0.0078263	0.3081	3.15362	65.191	98.2165	25.1083	0.0138383	0.0018433								65737-64	K17-BS-1	37	2017-07-13	13.85	3582799000	Heizler, M	Sanidine	12	IR1009		129.138.12.160	7.875	Ar40 = L @ 8/7/17 9:45 AM; Ar39 = L @ 8/7/17 9:45 AM; Ar38 = L @ 8/7/17 9:45 AM; Ar37 = L @ 8/7/17 9:45 AM; Ar36 = L @ 8/7/17 9:45 AM; Ar40 = L @ 8/7/17 4:12 PM; Ar39 = L @ 8/7/17 4:12 PM; Ar38 = L @ 8/7/17 4:12 PM; Ar37 = L @ 8/7/17 4:12 PM; Ar36 = L @ 8/7/17 4:12 PM; Ar41 bk val,er = @ 8/7/17 4:17 PM; Average background @ 8/7/17 4:17 PM; Ar40 bk val,er = @ 8/7/17 4:17 PM; Average background @ 8…	N:12	ALLLLLAAAAAA	1	Pychron Script	1	Fusions CO2	4.5	0	0	0	0	30	30	157			0
	28	4.5	5.15036	0.0070142	0.5453	3.10692	72.7387	96.8774	25.1268	0.0160852	0.0018433								65737-28	K17-BS-1	37	2017-07-13	8.1	3582778000	Heizler, M	Sanidine	12	IR1009		129.138.12.160	7.875	Ar40 = L @ 8/7/17 9:45 AM; Ar39 = L @ 8/7/17 9:45 AM; Ar38 = L @ 8/7/17 9:45 AM; Ar37 = L @ 8/7/17 9:45 AM; Ar36 = L @ 8/7/17 9:45 AM; Ar40 = L @ 8/7/17 4:11 PM; Ar39 = L @ 8/7/17 4:11 PM; Ar38 = L @ 8/7/17 4:11 PM; Ar37 = L @ 8/7/17 4:11 PM; Ar36 = L @ 8/7/17 4:11 PM; Ar41 bk val,er = @ 8/7/17 4:17 PM; Average background @ 8/7/17 4:17 PM; Ar40 bk val,er = @ 8/7/17 4:17 PM; Average background @ 8…	N:12	ALLLLLAAAAAA	1	Pychron Script	1	Fusions CO2	4.5	0	0	0	0	30	30	121			0
	84	4.5	5.28765	0.0056399	0.6305	6.17604	90.4633	96.4795	25.6877	0.0108174	0.0018433								65737-84	K17-BS-1	37	2017-07-13	16.7667	3582809000	Heizler, M	Sanidine	12	IR1009		129.138.12.160	7.875	Ar40 = L @ 8/7/17 9:45 AM; Ar39 = L @ 8/7/17 9:45 AM; Ar38 = L @ 8/7/17 9:45 AM; Ar37 = L @ 8/7/17 9:45 AM; Ar36 = L @ 8/7/17 9:45 AM; Ar40 = L @ 8/7/17 4:12 PM; Ar39 = L @ 8/7/17 4:12 PM; Ar38 = L @ 8/7/17 4:12 PM; Ar37 = L @ 8/7/17 4:12 PM; Ar36 = L @ 8/7/17 4:12 PM; Ar41 bk val,er = @ 8/7/17 4:17 PM; Average background @ 8/7/17 4:17 PM; Ar40 bk val,er = @ 8/7/17 4:17 PM; Average background @ 8…	N:12	ALLLLLAAAAAA	1	Pychron Script	1	Fusions CO2	4.5	0	0	0	0	30	30	177			0
	07	4.5	6.07707	0.0038858	3.076	0.515971	131.3	85.0272	26.0216	0.0844668	0.0018433								65737-07	K17-BS-1	37	2017-07-13	3.56667	3582762000	Heizler, M	Sanidine	12	IR1009		129.138.12.160	7.875	Ar40 = L @ 8/7/17 9:44 AM; Ar39 = L @ 8/7/17 9:44 AM; Ar38 = L @ 8/7/17 9:44 AM; Ar37 = L @ 8/7/17 9:44 AM; Ar36 = L @ 8/7/17 9:44 AM; Ar40 = L @ 8/7/17 4:11 PM; Ar39 = L @ 8/7/17 4:11 PM; Ar38 = L @ 8/7/17 4:11 PM; Ar37 = L @ 8/7/17 4:11 PM; Ar36 = L @ 8/7/17 4:11 PM; Ar41 bk val,er = @ 8/7/17 4:17 PM; Average background @ 8/7/17 4:17 PM; Ar40 bk val,er = @ 8/7/17 4:17 PM; Average background @ 8…	N:12	ALLLLLAAAAAA	1	Pychron Script	1	Fusions CO2	4.5	0	0	0	0	30	30	100			0
	02	4.5	5.29413	0.0147344	0.1576	4.45108	34.6267	99.1417	26.4238	0.0090234	0.0018433								65737-02	K17-BS-1	37	2017-07-13	2.38333	3582757000	Heizler, M	Sanidine	12	IR1009		129.138.12.160	7.875	Ar40 = L @ 8/7/17 9:44 AM; Ar39 = L @ 8/7/17 9:44 AM; Ar38 = L @ 8/7/17 9:44 AM; Ar37 = L @ 8/7/17 9:44 AM; Ar36 = L @ 8/7/17 9:44 AM; Ar40 = L @ 8/7/17 4:11 PM; Ar39 = L @ 8/7/17 4:11 PM; Ar38 = L @ 8/7/17 4:11 PM; Ar37 = L @ 8/7/17 4:11 PM; Ar36 = L @ 8/7/17 4:11 PM; Ar41 bk val,er = @ 8/7/17 4:17 PM; Average background @ 8/7/17 4:17 PM; Ar40 bk val,er = @ 8/7/17 4:17 PM; Average background @ 8…	N:12	ALLLLLAAAAAA	1	Pychron Script	1	Fusions CO2	4.5	0	0	0	0	30	30	95			0
	70	4.5	5.46763	0.007132	0.3501	5.15276	71.5373	98.1155	27.0043	0.0098721	0.0018433								65737-70	K17-BS-1	37	2017-07-13	14.7667	3582802000	Heizler, M	Sanidine	12	IR1009		129.138.12.160	7.875	Ar40 = L @ 8/7/17 9:45 AM; Ar39 = L @ 8/7/17 9:45 AM; Ar38 = L @ 8/7/17 9:45 AM; Ar37 = L @ 8/7/17 9:45 AM; Ar36 = L @ 8/7/17 9:45 AM; Ar40 = L @ 8/7/17 4:12 PM; Ar39 = L @ 8/7/17 4:12 PM; Ar38 = L @ 8/7/17 4:12 PM; Ar37 = L @ 8/7/17 4:12 PM; Ar36 = L @ 8/7/17 4:12 PM; Ar41 bk val,er = @ 8/7/17 4:17 PM; Average background @ 8/7/17 4:17 PM; Ar40 bk val,er = @ 8/7/17 4:17 PM; Average background @ 8…	N:12	ALLLLLAAAAAA	1	Pychron Script	1	Fusions CO2	4.5	0	0	0	0	30	30	163			0
	58	4.5	5.46449	0.0053002	0.2446	5.63427	96.2613	98.6832	27.1438	0.0090692	0.0018433								65737-58	K17-BS-1	37	2017-07-13	12.55	3582794000	Heizler, M	Sanidine	12	IR1009		129.138.12.160	7.875	Ar40 = L @ 8/7/17 9:45 AM; Ar39 = L @ 8/7/17 9:45 AM; Ar38 = L @ 8/7/17 9:45 AM; Ar37 = L @ 8/7/17 9:45 AM; Ar36 = L @ 8/7/17 9:45 AM; Ar40 = L @ 8/7/17 4:12 PM; Ar39 = L @ 8/7/17 4:12 PM; Ar38 = L @ 8/7/17 4:12 PM; Ar37 = L @ 8/7/17 4:12 PM; Ar36 = L @ 8/7/17 4:12 PM; Ar41 bk val,er = @ 8/7/17 4:17 PM; Average background @ 8/7/17 4:17 PM; Ar40 bk val,er = @ 8/7/17 4:17 PM; Average background @ 8…	N:12	ALLLLLAAAAAA	1	Pychron Script	1	Fusions CO2	4.5	0	0	0	0	30	30	151			0
	47	4.5	5.71237	0.0097844	0.7276	4.97521	52.1446	96.2444	27.6719	0.0128601	0.0018433								65737-47	K17-BS-1	37	2017-07-13	10.8667	3582788000	Heizler, M	Sanidine	12	IR1009		129.138.12.160	7.875	Ar40 = L @ 8/7/17 9:45 AM; Ar39 = L @ 8/7/17 9:45 AM; Ar38 = L @ 8/7/17 9:45 AM; Ar37 = L @ 8/7/17 9:45 AM; Ar36 = L @ 8/7/17 9:45 AM; Ar40 = L @ 8/7/17 4:12 PM; Ar39 = L @ 8/7/17 4:12 PM; Ar38 = L @ 8/7/17 4:12 PM; Ar37 = L @ 8/7/17 4:12 PM; Ar36 = L @ 8/7/17 4:12 PM; Ar41 bk val,er = @ 8/7/17 4:17 PM; Average background @ 8/7/17 4:17 PM; Ar40 bk val,er = @ 8/7/17 4:17 PM; Average background @ 8…	N:12	ALLLLLAAAAAA	1	Pychron Script	1	Fusions CO2	4.5	0	0	0	0	30	30	140			0
	48	4.5	5.58207	0.0107439	0.2869	5.88971	47.4878	98.4947	27.6719	0.0091086	0.0018433								65737-48	K17-BS-1	37	2017-07-13	11.2167	3582789000	Heizler, M	Sanidine	12	IR1009		129.138.12.160	7.875	Ar40 = L @ 8/7/17 9:45 AM; Ar39 = L @ 8/7/17 9:45 AM; Ar38 = L @ 8/7/17 9:45 AM; Ar37 = L @ 8/7/17 9:45 AM; Ar36 = L @ 8/7/17 9:45 AM; Ar40 = L @ 8/7/17 4:12 PM; Ar39 = L @ 8/7/17 4:12 PM; Ar38 = L @ 8/7/17 4:12 PM; Ar37 = L @ 8/7/17 4:12 PM; Ar36 = L @ 8/7/17 4:12 PM; Ar41 bk val,er = @ 8/7/17 4:17 PM; Average background @ 8/7/17 4:17 PM; Ar40 bk val,er = @ 8/7/17 4:17 PM; Average background @ 8…	N:12	ALLLLLAAAAAA	1	Pychron Script	1	Fusions CO2	4.5	0	0	0	0	30	30	141			0
	25	4.5	5.58666	0.0071335	0.2942	10.7527	71.5223	98.4517	27.6825	0.0067271	0.0018433								65737-25	K17-BS-1	37	2017-07-13	6.26667	3582771000	Heizler, M	Sanidine	12	IR1009		129.138.12.160	7.875	Ar40 = L @ 8/7/17 9:45 AM; Ar39 = L @ 8/7/17 9:45 AM; Ar38 = L @ 8/7/17 9:45 AM; Ar37 = L @ 8/7/17 9:45 AM; Ar36 = L @ 8/7/17 9:45 AM; Ar40 = L @ 8/7/17 4:11 PM; Ar39 = L @ 8/7/17 4:11 PM; Ar38 = L @ 8/7/17 4:11 PM; Ar37 = L @ 8/7/17 4:11 PM; Ar36 = L @ 8/7/17 4:11 PM; Ar41 bk val,er = @ 8/7/17 4:17 PM; Average background @ 8/7/17 4:17 PM; Ar40 bk val,er = @ 8/7/17 4:17 PM; Average background @ 8…	N:12	ALLLLLAAAAAA	1	Pychron Script	1	Fusions CO2	4.5	0	0	0	0	30	30	118			0
	15	4.5	5.63582	0.0092189	0.307	2.20706	55.3433	98.4017	27.9106	0.0180973	0.0018433								65737-15	K17-BS-1	37	2017-07-13	4.71667	3582766000	Heizler, M	Sanidine	12	IR1009		129.138.12.160	7.875	Ar40 = L @ 8/7/17 9:45 AM; Ar39 = L @ 8/7/17 9:45 AM; Ar38 = L @ 8/7/17 9:45 AM; Ar37 = L @ 8/7/17 9:45 AM; Ar36 = L @ 8/7/17 9:45 AM; Ar40 = L @ 8/7/17 4:11 PM; Ar39 = L @ 8/7/17 4:11 PM; Ar38 = L @ 8/7/17 4:11 PM; Ar37 = L @ 8/7/17 4:11 PM; Ar36 = L @ 8/7/17 4:11 PM; Ar41 bk val,er = @ 8/7/17 4:17 PM; Average background @ 8/7/17 4:17 PM; Ar40 bk val,er = @ 8/7/17 4:17 PM; Average background @ 8…	N:12	ALLLLLAAAAAA	1	Pychron Script	1	Fusions CO2	4.5	0	0	0	0	30	30	108			0
	76	4.5	5.6358	0.0072952	0.1302	4.55483	69.9369	99.3268	28.1709	0.0093655	0.0018433								65737-76	K17-BS-1	37	2017-07-13	15.8667	3582806000	Heizler, M	Sanidine	12	IR1009		129.138.12.160	7.875	Ar40 = L @ 8/7/17 9:45 AM; Ar39 = L @ 8/7/17 9:45 AM; Ar38 = L @ 8/7/17 9:45 AM; Ar37 = L @ 8/7/17 9:45 AM; Ar36 = L @ 8/7/17 9:45 AM; Ar40 = L @ 8/7/17 4:12 PM; Ar39 = L @ 8/7/17 4:12 PM; Ar38 = L @ 8/7/17 4:12 PM; Ar37 = L @ 8/7/17 4:12 PM; Ar36 = L @ 8/7/17 4:12 PM; Ar41 bk val,er = @ 8/7/17 4:17 PM; Average background @ 8/7/17 4:17 PM; Ar40 bk val,er = @ 8/7/17 4:17 PM; Average background @ 8…	N:12	ALLLLLAAAAAA	1	Pychron Script	1	Fusions CO2	4.5	0	0	0	0	30	30	169			0
	29	4.5	5.74488	0.0072947	0.4729	9.81127	69.9417	97.5742	28.2099	0.0075992	0.0018433								65737-29	K17-BS-1	37	2017-07-13	8.2	3582778000	Heizler, M	Sanidine	12	IR1009		129.138.12.160	7.875	Ar40 = L @ 8/7/17 9:45 AM; Ar39 = L @ 8/7/17 9:45 AM; Ar38 = L @ 8/7/17 9:45 AM; Ar37 = L @ 8/7/17 9:45 AM; Ar36 = L @ 8/7/17 9:45 AM; Ar40 = L @ 8/7/17 4:11 PM; Ar39 = L @ 8/7/17 4:11 PM; Ar38 = L @ 8/7/17 4:11 PM; Ar37 = L @ 8/7/17 4:11 PM; Ar36 = L @ 8/7/17 4:11 PM; Ar41 bk val,er = @ 8/7/17 4:17 PM; Average background @ 8/7/17 4:17 PM; Ar40 bk val,er = @ 8/7/17 4:17 PM; Average background @ 8…	N:12	ALLLLLAAAAAA	1	Pychron Script	1	Fusions CO2	4.5	0	0	0	0	30	30	122			0
	19	4.5	5.63872	0.0074477	0.088	3.25082	68.5049	99.549	28.2479	0.0111419	0.0018433								65737-19	K17-BS-1	37	2017-07-13	5.58333	3582769000	Heizler, M	Sanidine	12	IR1009		129.138.12.160	7.875	Ar40 = L @ 8/7/17 9:45 AM; Ar39 = L @ 8/7/17 9:45 AM; Ar38 = L @ 8/7/17 9:45 AM; Ar37 = L @ 8/7/17 9:45 AM; Ar36 = L @ 8/7/17 9:45 AM; Ar40 = L @ 8/7/17 4:11 PM; Ar39 = L @ 8/7/17 4:11 PM; Ar38 = L @ 8/7/17 4:11 PM; Ar37 = L @ 8/7/17 4:11 PM; Ar36 = L @ 8/7/17 4:11 PM; Ar41 bk val,er = @ 8/7/17 4:17 PM; Average background @ 8/7/17 4:17 PM; Ar40 bk val,er = @ 8/7/17 4:17 PM; Average background @ 8…	N:12	ALLLLLAAAAAA	1	Pychron Script	1	Fusions CO2	4.5	0	0	0	0	30	30	112			0
	30	4.5	6.001	0.0085037	1.3049	4.70543	59.9979	93.5768	28.2618	0.0155655	0.0018433								65737-30	K17-BS-1	37	2017-07-13	8.31667	3582779000	Heizler, M	Sanidine	12	IR1009		129.138.12.160	7.875	Ar40 = L @ 8/7/17 9:45 AM; Ar39 = L @ 8/7/17 9:45 AM; Ar38 = L @ 8/7/17 9:45 AM; Ar37 = L @ 8/7/17 9:45 AM; Ar36 = L @ 8/7/17 9:45 AM; Ar40 = L @ 8/7/17 4:11 PM; Ar39 = L @ 8/7/17 4:11 PM; Ar38 = L @ 8/7/17 4:11 PM; Ar37 = L @ 8/7/17 4:11 PM; Ar36 = L @ 8/7/17 4:11 PM; Ar41 bk val,er = @ 8/7/17 4:17 PM; Average background @ 8/7/17 4:17 PM; Ar40 bk val,er = @ 8/7/17 4:17 PM; Average background @ 8…	N:12	ALLLLLAAAAAA	1	Pychron Script	1	Fusions CO2	4.5	0	0	0	0	30	30	123			0
	65	4.5	5.81867	0.0173764	0.3476	4.54511	29.3619	98.2564	28.7684	0.0105891	0.0018433								65737-65	K17-BS-1	37	2017-07-13	13.9667	3582799000	Heizler, M	Sanidine	12	IR1009		129.138.12.160	7.875	Ar40 = L @ 8/7/17 9:45 AM; Ar39 = L @ 8/7/17 9:45 AM; Ar38 = L @ 8/7/17 9:45 AM; Ar37 = L @ 8/7/17 9:45 AM; Ar36 = L @ 8/7/17 9:45 AM; Ar40 = L @ 8/7/17 4:12 PM; Ar39 = L @ 8/7/17 4:12 PM; Ar38 = L @ 8/7/17 4:12 PM; Ar37 = L @ 8/7/17 4:12 PM; Ar36 = L @ 8/7/17 4:12 PM; Ar41 bk val,er = @ 8/7/17 4:17 PM; Average background @ 8/7/17 4:17 PM; Ar40 bk val,er = @ 8/7/17 4:17 PM; Average background @ 8…	N:12	ALLLLLAAAAAA	1	Pychron Script	1	Fusions CO2	4.5	0	0	0	0	30	30	158			0
	61	4.5	6.55194	0.018827	2.6593	2.40064	27.0996	88.0138	29.0199	0.0303517	0.0018433								65737-61	K17-BS-1	37	2017-07-13	13.1	3582796000	Heizler, M	Sanidine	12	IR1009		129.138.12.160	7.875	Ar40 = L @ 8/7/17 9:45 AM; Ar39 = L @ 8/7/17 9:45 AM; Ar38 = L @ 8/7/17 9:45 AM; Ar37 = L @ 8/7/17 9:45 AM; Ar36 = L @ 8/7/17 9:45 AM; Ar40 = L @ 8/7/17 4:12 PM; Ar39 = L @ 8/7/17 4:12 PM; Ar38 = L @ 8/7/17 4:12 PM; Ar37 = L @ 8/7/17 4:12 PM; Ar36 = L @ 8/7/17 4:12 PM; Ar41 bk val,er = @ 8/7/17 4:17 PM; Average background @ 8/7/17 4:17 PM; Ar40 bk val,er = @ 8/7/17 4:17 PM; Average background @ 8…	N:12	ALLLLLAAAAAA	1	Pychron Script	1	Fusions CO2	4.5	0	0	0	0	30	30	154			0
	62	4.5	5.93848	0.0058391	0.0442	5.34391	87.3772	99.7879	29.8106	0.0084737	0.0018433								65737-62	K17-BS-1	37	2017-07-13	13.2167	3582796000	Heizler, M	Sanidine	12	IR1009		129.138.12.160	7.875	Ar40 = L @ 8/7/17 9:45 AM; Ar39 = L @ 8/7/17 9:45 AM; Ar38 = L @ 8/7/17 9:45 AM; Ar37 = L @ 8/7/17 9:45 AM; Ar36 = L @ 8/7/17 9:45 AM; Ar40 = L @ 8/7/17 4:12 PM; Ar39 = L @ 8/7/17 4:12 PM; Ar38 = L @ 8/7/17 4:12 PM; Ar37 = L @ 8/7/17 4:12 PM; Ar36 = L @ 8/7/17 4:12 PM; Ar41 bk val,er = @ 8/7/17 4:17 PM; Average background @ 8/7/17 4:17 PM; Ar40 bk val,er = @ 8/7/17 4:17 PM; Average background @ 8…	N:12	ALLLLLAAAAAA	1	Pychron Script	1	Fusions CO2	4.5	0	0	0	0	30	30	155			0
	08	4.5	5.97818	0.0054376	0.0841	9.4414	93.8289	99.5914	29.9499	0.0057374	0.0018433								65737-08	K17-BS-1	37	2017-07-13	3.91667	3582763000	Heizler, M	Sanidine	12	IR1009		129.138.12.160	7.875	Ar40 = L @ 8/7/17 9:44 AM; Ar39 = L @ 8/7/17 9:44 AM; Ar38 = L @ 8/7/17 9:44 AM; Ar37 = L @ 8/7/17 9:44 AM; Ar36 = L @ 8/7/17 9:44 AM; Ar40 = L @ 8/7/17 4:11 PM; Ar39 = L @ 8/7/17 4:11 PM; Ar38 = L @ 8/7/17 4:11 PM; Ar37 = L @ 8/7/17 4:11 PM; Ar36 = L @ 8/7/17 4:11 PM; Ar41 bk val,er = @ 8/7/17 4:17 PM; Average background @ 8/7/17 4:17 PM; Ar40 bk val,er = @ 8/7/17 4:17 PM; Average background @ 8…	N:12	ALLLLLAAAAAA	1	Pychron Script	1	Fusions CO2	4.5	0	0	0	0	30	30	101			0
	77	4.5	6.06315	0.0080285	0.352	6.91592	63.5491	98.293	29.98	0.0084509	0.0018433								65737-77	K17-BS-1	37	2017-07-13	15.9667	3582806000	Heizler, M	Sanidine	12	IR1009		129.138.12.160	7.875	Ar40 = L @ 8/7/17 9:45 AM; Ar39 = L @ 8/7/17 9:45 AM; Ar38 = L @ 8/7/17 9:45 AM; Ar37 = L @ 8/7/17 9:45 AM; Ar36 = L @ 8/7/17 9:45 AM; Ar40 = L @ 8/7/17 4:12 PM; Ar39 = L @ 8/7/17 4:12 PM; Ar38 = L @ 8/7/17 4:12 PM; Ar37 = L @ 8/7/17 4:12 PM; Ar36 = L @ 8/7/17 4:12 PM; Ar41 bk val,er = @ 8/7/17 4:17 PM; Average background @ 8/7/17 4:17 PM; Ar40 bk val,er = @ 8/7/17 4:17 PM; Average background @ 8…	N:12	ALLLLLAAAAAA	1	Pychron Script	1	Fusions CO2	4.5	0	0	0	0	30	30	170			0
	06	4.5	6.04559	0.0064833	0.0972	7.52144	78.6951	99.5331	30.2678	0.0068152	0.0018433								65737-06	K17-BS-1	37	2017-07-13	3.46667	3582761000	Heizler, M	Sanidine	12	IR1009		129.138.12.160	7.875	Ar40 = L @ 8/7/17 9:44 AM; Ar39 = L @ 8/7/17 9:44 AM; Ar38 = L @ 8/7/17 9:44 AM; Ar37 = L @ 8/7/17 9:44 AM; Ar36 = L @ 8/7/17 9:44 AM; Ar40 = L @ 8/7/17 4:11 PM; Ar39 = L @ 8/7/17 4:11 PM; Ar38 = L @ 8/7/17 4:11 PM; Ar37 = L @ 8/7/17 4:11 PM; Ar36 = L @ 8/7/17 4:11 PM; Ar41 bk val,er = @ 8/7/17 4:17 PM; Average background @ 8/7/17 4:17 PM; Ar40 bk val,er = @ 8/7/17 4:17 PM; Average background @ 8…	N:12	ALLLLLAAAAAA	1	Pychron Script	1	Fusions CO2	4.5	0	0	0	0	30	30	99			0
	72	4.5	6.1731	0.0065406	0.297	3.56469	78.0057	98.5852	30.6099	0.0127861	0.0018433								65737-72	K17-BS-1	37	2017-07-13	14.9833	3582803000	Heizler, M	Sanidine	12	IR1009		129.138.12.160	7.875	Ar40 = L @ 8/7/17 9:45 AM; Ar39 = L @ 8/7/17 9:45 AM; Ar38 = L @ 8/7/17 9:45 AM; Ar37 = L @ 8/7/17 9:45 AM; Ar36 = L @ 8/7/17 9:45 AM; Ar40 = L @ 8/7/17 4:12 PM; Ar39 = L @ 8/7/17 4:12 PM; Ar38 = L @ 8/7/17 4:12 PM; Ar37 = L @ 8/7/17 4:12 PM; Ar36 = L @ 8/7/17 4:12 PM; Ar41 bk val,er = @ 8/7/17 4:17 PM; Average background @ 8/7/17 4:17 PM; Ar40 bk val,er = @ 8/7/17 4:17 PM; Average background @ 8…	N:12	ALLLLLAAAAAA	1	Pychron Script	1	Fusions CO2	4.5	0	0	0	0	30	30	165			0
	21	4.5	6.27261	0.0087865	0.1945	8.17	58.0668	99.0938	31.259	0.0071068	0.0018433								65737-21	K17-BS-1	37	2017-07-13	5.8	3582770000	Heizler, M	Sanidine	12	IR1009		129.138.12.160	7.875	Ar40 = L @ 8/7/17 9:45 AM; Ar39 = L @ 8/7/17 9:45 AM; Ar38 = L @ 8/7/17 9:45 AM; Ar37 = L @ 8/7/17 9:45 AM; Ar36 = L @ 8/7/17 9:45 AM; Ar40 = L @ 8/7/17 4:11 PM; Ar39 = L @ 8/7/17 4:11 PM; Ar38 = L @ 8/7/17 4:11 PM; Ar37 = L @ 8/7/17 4:11 PM; Ar36 = L @ 8/7/17 4:11 PM; Ar41 bk val,er = @ 8/7/17 4:17 PM; Average background @ 8/7/17 4:17 PM; Ar40 bk val,er = @ 8/7/17 4:17 PM; Average background @ 8…	N:12	ALLLLLAAAAAA	1	Pychron Script	1	Fusions CO2	4.5	0	0	0	0	30	30	114			0
	86	4.5	6.34939	0.0085568	0.2805	2.7958	59.6256	98.7039	31.5154	0.0147948	0.0018433								65737-86	K17-BS-1	37	2017-07-13	16.9833	3582810000	Heizler, M	Sanidine	12	IR1009		129.138.12.160	7.875	Ar40 = L @ 8/7/17 9:45 AM; Ar39 = L @ 8/7/17 9:45 AM; Ar38 = L @ 8/7/17 9:45 AM; Ar37 = L @ 8/7/17 9:45 AM; Ar36 = L @ 8/7/17 9:45 AM; Ar40 = L @ 8/7/17 4:12 PM; Ar39 = L @ 8/7/17 4:12 PM; Ar38 = L @ 8/7/17 4:12 PM; Ar37 = L @ 8/7/17 4:12 PM; Ar36 = L @ 8/7/17 4:12 PM; Ar41 bk val,er = @ 8/7/17 4:17 PM; Average background @ 8/7/17 4:17 PM; Ar40 bk val,er = @ 8/7/17 4:17 PM; Average background @ 8…	N:12	ALLLLLAAAAAA	1	Pychron Script	1	Fusions CO2	4.5	0	0	0	0	30	30	179			0
	54	4.5	6.4897	0.0155728	0.2903	3.55868	32.7625	98.6957	32.2042	0.0122109	0.0018433								65737-54	K17-BS-1	37	2017-07-13	12.1	3582792000	Heizler, M	Sanidine	12	IR1009		129.138.12.160	7.875	Ar40 = L @ 8/7/17 9:45 AM; Ar39 = L @ 8/7/17 9:45 AM; Ar38 = L @ 8/7/17 9:45 AM; Ar37 = L @ 8/7/17 9:45 AM; Ar36 = L @ 8/7/17 9:45 AM; Ar40 = L @ 8/7/17 4:12 PM; Ar39 = L @ 8/7/17 4:12 PM; Ar38 = L @ 8/7/17 4:12 PM; Ar37 = L @ 8/7/17 4:12 PM; Ar36 = L @ 8/7/17 4:12 PM; Ar41 bk val,er = @ 8/7/17 4:17 PM; Average background @ 8/7/17 4:17 PM; Ar40 bk val,er = @ 8/7/17 4:17 PM; Average background @ 8…	N:12	ALLLLLAAAAAA	1	Pychron Script	1	Fusions CO2	4.5	0	0	0	0	30	30	147			0
	69	4.5	6.63385	0.0077583	0.7352	3.31569	65.7623	96.7305	32.2643	0.0157662	0.0018433								65737-69	K17-BS-1	37	2017-07-13	14.65	3582802000	Heizler, M	Sanidine	12	IR1009		129.138.12.160	7.875	Ar40 = L @ 8/7/17 9:45 AM; Ar39 = L @ 8/7/17 9:45 AM; Ar38 = L @ 8/7/17 9:45 AM; Ar37 = L @ 8/7/17 9:45 AM; Ar36 = L @ 8/7/17 9:45 AM; Ar40 = L @ 8/7/17 4:12 PM; Ar39 = L @ 8/7/17 4:12 PM; Ar38 = L @ 8/7/17 4:12 PM; Ar37 = L @ 8/7/17 4:12 PM; Ar36 = L @ 8/7/17 4:12 PM; Ar41 bk val,er = @ 8/7/17 4:17 PM; Average background @ 8/7/17 4:17 PM; Ar40 bk val,er = @ 8/7/17 4:17 PM; Average background @ 8…	N:12	ALLLLLAAAAAA	1	Pychron Script	1	Fusions CO2	4.5	0	0	0	0	30	30	162			0
	24	4.5	6.4668	0.0161808	0.134	2.33217	31.5314	99.4075	32.3209	0.0165442	0.0018433								65737-24	K17-BS-1	37	2017-07-13	6.15	3582771000	Heizler, M	Sanidine	12	IR1009		129.138.12.160	7.875	Ar40 = L @ 8/7/17 9:45 AM; Ar39 = L @ 8/7/17 9:45 AM; Ar38 = L @ 8/7/17 9:45 AM; Ar37 = L @ 8/7/17 9:45 AM; Ar36 = L @ 8/7/17 9:45 AM; Ar40 = L @ 8/7/17 4:11 PM; Ar39 = L @ 8/7/17 4:11 PM; Ar38 = L @ 8/7/17 4:11 PM; Ar37 = L @ 8/7/17 4:11 PM; Ar36 = L @ 8/7/17 4:11 PM; Ar41 bk val,er = @ 8/7/17 4:17 PM; Average background @ 8/7/17 4:17 PM; Ar40 bk val,er = @ 8/7/17 4:17 PM; Average background @ 8…	N:12	ALLLLLAAAAAA	1	Pychron Script	1	Fusions CO2	4.5	0	0	0	0	30	30	117			0
	27	4.5	6.59752	0.0095639	0.5684	2.9727	53.3469	97.4626	32.3297	0.015514	0.0018433								65737-27	K17-BS-1	37	2017-07-13	6.48333	3582772000	Heizler, M	Sanidine	12	IR1009		129.138.12.160	7.875	Ar40 = L @ 8/7/17 9:45 AM; Ar39 = L @ 8/7/17 9:45 AM; Ar38 = L @ 8/7/17 9:45 AM; Ar37 = L @ 8/7/17 9:45 AM; Ar36 = L @ 8/7/17 9:45 AM; Ar40 = L @ 8/7/17 4:11 PM; Ar39 = L @ 8/7/17 4:11 PM; Ar38 = L @ 8/7/17 4:11 PM; Ar37 = L @ 8/7/17 4:11 PM; Ar36 = L @ 8/7/17 4:11 PM; Ar41 bk val,er = @ 8/7/17 4:17 PM; Average background @ 8/7/17 4:17 PM; Ar40 bk val,er = @ 8/7/17 4:17 PM; Average background @ 8…	N:12	ALLLLLAAAAAA	1	Pychron Script	1	Fusions CO2	4.5	0	0	0	0	30	30	120			0
	17	4.5	6.60334	0.016772	0.5346	2.872	30.42	97.6251	32.4116	0.0167954	0.0018433								65737-17	K17-BS-1	37	2017-07-13	5.15	3582767000	Heizler, M	Sanidine	12	IR1009		129.138.12.160	7.875	Ar40 = L @ 8/7/17 9:45 AM; Ar39 = L @ 8/7/17 9:45 AM; Ar38 = L @ 8/7/17 9:45 AM; Ar37 = L @ 8/7/17 9:45 AM; Ar36 = L @ 8/7/17 9:45 AM; Ar40 = L @ 8/7/17 4:11 PM; Ar39 = L @ 8/7/17 4:11 PM; Ar38 = L @ 8/7/17 4:11 PM; Ar37 = L @ 8/7/17 4:11 PM; Ar36 = L @ 8/7/17 4:11 PM; Ar41 bk val,er = @ 8/7/17 4:17 PM; Average background @ 8/7/17 4:17 PM; Ar40 bk val,er = @ 8/7/17 4:17 PM; Average background @ 8…	N:12	ALLLLLAAAAAA	1	Pychron Script	1	Fusions CO2	4.5	0	0	0	0	30	30	110			0
	80	4.5	7.0922	0.0088644	2.1812	3.57799	57.5565	90.9109	32.4198	0.0236154	0.0018433								65737-80	K17-BS-1	37	2017-07-13	16.3167	3582808000	Heizler, M	Sanidine	12	IR1009		129.138.12.160	7.875	Ar40 = L @ 8/7/17 9:45 AM; Ar39 = L @ 8/7/17 9:45 AM; Ar38 = L @ 8/7/17 9:45 AM; Ar37 = L @ 8/7/17 9:45 AM; Ar36 = L @ 8/7/17 9:45 AM; Ar40 = L @ 8/7/17 4:12 PM; Ar39 = L @ 8/7/17 4:12 PM; Ar38 = L @ 8/7/17 4:12 PM; Ar37 = L @ 8/7/17 4:12 PM; Ar36 = L @ 8/7/17 4:12 PM; Ar41 bk val,er = @ 8/7/17 4:17 PM; Average background @ 8/7/17 4:17 PM; Ar40 bk val,er = @ 8/7/17 4:17 PM; Average background @ 8…	N:12	ALLLLLAAAAAA	1	Pychron Script	1	Fusions CO2	4.5	0	0	0	0	30	30	173			0
	42	4.5	6.5952	0.0089719	0.4946	6.69419	56.8669	97.792	32.4267	0.0104776	0.0018433								65737-42	K17-BS-1	37	2017-07-13	10.0833	3582785000	Heizler, M	Sanidine	12	IR1009		129.138.12.160	7.875	Ar40 = L @ 8/7/17 9:45 AM; Ar39 = L @ 8/7/17 9:45 AM; Ar38 = L @ 8/7/17 9:45 AM; Ar37 = L @ 8/7/17 9:45 AM; Ar36 = L @ 8/7/17 9:45 AM; Ar40 = L @ 8/7/17 4:12 PM; Ar39 = L @ 8/7/17 4:12 PM; Ar38 = L @ 8/7/17 4:12 PM; Ar37 = L @ 8/7/17 4:12 PM; Ar36 = L @ 8/7/17 4:12 PM; Ar41 bk val,er = @ 8/7/17 4:17 PM; Average background @ 8/7/17 4:17 PM; Ar40 bk val,er = @ 8/7/17 4:17 PM; Average background @ 8…	N:12	ALLLLLAAAAAA	1	Pychron Script	1	Fusions CO2	4.5	0	0	0	0	30	30	135			0
	46	4.5	6.89571	0.011475	1.51	1.07148	44.4622	93.5343	32.4299	0.0420684	0.0018433								65737-46	K17-BS-1	37	2017-07-13	10.75	3582788000	Heizler, M	Sanidine	12	IR1009		129.138.12.160	7.875	Ar40 = L @ 8/7/17 9:45 AM; Ar39 = L @ 8/7/17 9:45 AM; Ar38 = L @ 8/7/17 9:45 AM; Ar37 = L @ 8/7/17 9:45 AM; Ar36 = L @ 8/7/17 9:45 AM; Ar40 = L @ 8/7/17 4:12 PM; Ar39 = L @ 8/7/17 4:12 PM; Ar38 = L @ 8/7/17 4:12 PM; Ar37 = L @ 8/7/17 4:12 PM; Ar36 = L @ 8/7/17 4:12 PM; Ar41 bk val,er = @ 8/7/17 4:17 PM; Average background @ 8/7/17 4:17 PM; Ar40 bk val,er = @ 8/7/17 4:17 PM; Average background @ 8…	N:12	ALLLLLAAAAAA	1	Pychron Script	1	Fusions CO2	4.5	0	0	0	0	30	30	139			0
	40	4.5	6.56249	0.0072057	0.3757	2.93879	70.8056	98.3154	32.4382	0.0160305	0.0018433								65737-40	K17-BS-1	37	2017-07-13	9.86667	3582784000	Heizler, M	Sanidine	12	IR1009		129.138.12.160	7.875	Ar40 = L @ 8/7/17 9:45 AM; Ar39 = L @ 8/7/17 9:45 AM; Ar38 = L @ 8/7/17 9:45 AM; Ar37 = L @ 8/7/17 9:45 AM; Ar36 = L @ 8/7/17 9:45 AM; Ar40 = L @ 8/7/17 4:11 PM; Ar39 = L @ 8/7/17 4:11 PM; Ar38 = L @ 8/7/17 4:11 PM; Ar37 = L @ 8/7/17 4:11 PM; Ar36 = L @ 8/7/17 4:11 PM; Ar41 bk val,er = @ 8/7/17 4:17 PM; Average background @ 8/7/17 4:17 PM; Ar40 bk val,er = @ 8/7/17 4:17 PM; Average background @ 8…	N:12	ALLLLLAAAAAA	1	Pychron Script	1	Fusions CO2	4.5	0	0	0	0	30	30	133			0
	12	4.5	6.6478	0.0051067	0.2229	7.78729	99.9087	99.0143	33.0881	0.0079938	0.0018433								65737-12	K17-BS-1	37	2017-07-13	4.36667	3582765000	Heizler, M	Sanidine	12	IR1009		129.138.12.160	7.875	Ar40 = L @ 8/7/17 9:45 AM; Ar39 = L @ 8/7/17 9:45 AM; Ar38 = L @ 8/7/17 9:45 AM; Ar37 = L @ 8/7/17 9:45 AM; Ar36 = L @ 8/7/17 9:45 AM; Ar40 = L @ 8/7/17 4:11 PM; Ar39 = L @ 8/7/17 4:11 PM; Ar38 = L @ 8/7/17 4:11 PM; Ar37 = L @ 8/7/17 4:11 PM; Ar36 = L @ 8/7/17 4:11 PM; Ar41 bk val,er = @ 8/7/17 4:17 PM; Average background @ 8/7/17 4:17 PM; Ar40 bk val,er = @ 8/7/17 4:17 PM; Average background @ 8…	N:12	ALLLLLAAAAAA	1	Pychron Script	1	Fusions CO2	4.5	0	0	0	0	30	30	105			0
	11	4.5	6.91548	0.0179787	0.9266	2.57106	28.3782	96.0564	33.3914	0.0201685	0.0018433								65737-11	K17-BS-1	37	2017-07-13	4.25	3582764000	Heizler, M	Sanidine	12	IR1009		129.138.12.160	7.875	Ar40 = L @ 8/7/17 9:45 AM; Ar39 = L @ 8/7/17 9:45 AM; Ar38 = L @ 8/7/17 9:45 AM; Ar37 = L @ 8/7/17 9:45 AM; Ar36 = L @ 8/7/17 9:45 AM; Ar40 = L @ 8/7/17 4:11 PM; Ar39 = L @ 8/7/17 4:11 PM; Ar38 = L @ 8/7/17 4:11 PM; Ar37 = L @ 8/7/17 4:11 PM; Ar36 = L @ 8/7/17 4:11 PM; Ar41 bk val,er = @ 8/7/17 4:17 PM; Average background @ 8/7/17 4:17 PM; Ar40 bk val,er = @ 8/7/17 4:17 PM; Average background @ 8…	N:12	ALLLLLAAAAAA	1	Pychron Script	1	Fusions CO2	4.5	0	0	0	0	30	30	104			0
	56	4.5	6.88156	0.0094325	0.5082	3.06307	54.09	97.8263	33.8353	0.0157524	0.0018433								65737-56	K17-BS-1	37	2017-07-13	12.3167	3582793000	Heizler, M	Sanidine	12	IR1009		129.138.12.160	7.875	Ar40 = L @ 8/7/17 9:45 AM; Ar39 = L @ 8/7/17 9:45 AM; Ar38 = L @ 8/7/17 9:45 AM; Ar37 = L @ 8/7/17 9:45 AM; Ar36 = L @ 8/7/17 9:45 AM; Ar40 = L @ 8/7/17 4:12 PM; Ar39 = L @ 8/7/17 4:12 PM; Ar38 = L @ 8/7/17 4:12 PM; Ar37 = L @ 8/7/17 4:12 PM; Ar36 = L @ 8/7/17 4:12 PM; Ar41 bk val,er = @ 8/7/17 4:17 PM; Average background @ 8/7/17 4:17 PM; Ar40 bk val,er = @ 8/7/17 4:17 PM; Average background @ 8…	N:12	ALLLLLAAAAAA	1	Pychron Script	1	Fusions CO2	4.5	0	0	0	0	30	30	149			0
	68	4.5	6.89166	0.0109768	0.4964	2.66557	46.4802	97.8819	33.9037	0.0171357	0.0018433								65737-68	K17-BS-1	37	2017-07-13	14.5333	3582801000	Heizler, M	Sanidine	12	IR1009		129.138.12.160	7.875	Ar40 = L @ 8/7/17 9:45 AM; Ar39 = L @ 8/7/17 9:45 AM; Ar38 = L @ 8/7/17 9:45 AM; Ar37 = L @ 8/7/17 9:45 AM; Ar36 = L @ 8/7/17 9:45 AM; Ar40 = L @ 8/7/17 4:12 PM; Ar39 = L @ 8/7/17 4:12 PM; Ar38 = L @ 8/7/17 4:12 PM; Ar37 = L @ 8/7/17 4:12 PM; Ar36 = L @ 8/7/17 4:12 PM; Ar41 bk val,er = @ 8/7/17 4:17 PM; Average background @ 8/7/17 4:17 PM; Ar40 bk val,er = @ 8/7/17 4:17 PM; Average background @ 8…	N:12	ALLLLLAAAAAA	1	Pychron Script	1	Fusions CO2	4.5	0	0	0	0	30	30	161			0
	26	4.5	6.92932	0.0119701	0.528	2.75593	42.6232	97.7597	34.0454	0.0173967	0.0018433								65737-26	K17-BS-1	37	2017-07-13	6.36667	3582772000	Heizler, M	Sanidine	12	IR1009		129.138.12.160	7.875	Ar40 = L @ 8/7/17 9:45 AM; Ar39 = L @ 8/7/17 9:45 AM; Ar38 = L @ 8/7/17 9:45 AM; Ar37 = L @ 8/7/17 9:45 AM; Ar36 = L @ 8/7/17 9:45 AM; Ar40 = L @ 8/7/17 4:11 PM; Ar39 = L @ 8/7/17 4:11 PM; Ar38 = L @ 8/7/17 4:11 PM; Ar37 = L @ 8/7/17 4:11 PM; Ar36 = L @ 8/7/17 4:11 PM; Ar41 bk val,er = @ 8/7/17 4:17 PM; Average background @ 8/7/17 4:17 PM; Ar40 bk val,er = @ 8/7/17 4:17 PM; Average background @ 8…	N:12	ALLLLLAAAAAA	1	Pychron Script	1	Fusions CO2	4.5	0	0	0	0	30	30	119			0
	18	4.5	6.8089	0.0036448	0.0656	2.31964	139.981	99.7196	34.1227	0.0157697	0.0018433								65737-18	K17-BS-1	37	2017-07-13	5.46667	3582769000	Heizler, M	Sanidine	12	IR1009		129.138.12.160	7.875	Ar40 = L @ 8/7/17 9:45 AM; Ar39 = L @ 8/7/17 9:45 AM; Ar38 = L @ 8/7/17 9:45 AM; Ar37 = L @ 8/7/17 9:45 AM; Ar36 = L @ 8/7/17 9:45 AM; Ar40 = L @ 8/7/17 4:11 PM; Ar39 = L @ 8/7/17 4:11 PM; Ar38 = L @ 8/7/17 4:11 PM; Ar37 = L @ 8/7/17 4:11 PM; Ar36 = L @ 8/7/17 4:11 PM; Ar41 bk val,er = @ 8/7/17 4:17 PM; Average background @ 8/7/17 4:17 PM; Ar40 bk val,er = @ 8/7/17 4:17 PM; Average background @ 8…	N:12	ALLLLLAAAAAA	1	Pychron Script	1	Fusions CO2	4.5	0	0	0	0	30	30	111			0
	82	4.5	6.87105	0.0062281	0.225	8.33754	81.9197	99.0385	34.1987	0.0075775	0.0018433								65737-82	K17-BS-1	37	2017-07-13	16.5333	3582808000	Heizler, M	Sanidine	12	IR1009		129.138.12.160	7.875	Ar40 = L @ 8/7/17 9:45 AM; Ar39 = L @ 8/7/17 9:45 AM; Ar38 = L @ 8/7/17 9:45 AM; Ar37 = L @ 8/7/17 9:45 AM; Ar36 = L @ 8/7/17 9:45 AM; Ar40 = L @ 8/7/17 4:12 PM; Ar39 = L @ 8/7/17 4:12 PM; Ar38 = L @ 8/7/17 4:12 PM; Ar37 = L @ 8/7/17 4:12 PM; Ar36 = L @ 8/7/17 4:12 PM; Ar41 bk val,er = @ 8/7/17 4:17 PM; Average background @ 8/7/17 4:17 PM; Ar40 bk val,er = @ 8/7/17 4:17 PM; Average background @ 8…	N:12	ALLLLLAAAAAA	1	Pychron Script	1	Fusions CO2	4.5	0	0	0	0	30	30	175			0
	59	4.5	7.14634	0.0112369	1.0958	1.67637	45.4043	95.4761	34.2904	0.0305245	0.0018433								65737-59	K17-BS-1	37	2017-07-13	12.6667	3582794000	Heizler, M	Sanidine	12	IR1009		129.138.12.160	7.875	Ar40 = L @ 8/7/17 9:45 AM; Ar39 = L @ 8/7/17 9:45 AM; Ar38 = L @ 8/7/17 9:45 AM; Ar37 = L @ 8/7/17 9:45 AM; Ar36 = L @ 8/7/17 9:45 AM; Ar40 = L @ 8/7/17 4:12 PM; Ar39 = L @ 8/7/17 4:12 PM; Ar38 = L @ 8/7/17 4:12 PM; Ar37 = L @ 8/7/17 4:12 PM; Ar36 = L @ 8/7/17 4:12 PM; Ar41 bk val,er = @ 8/7/17 4:17 PM; Average background @ 8/7/17 4:17 PM; Ar40 bk val,er = @ 8/7/17 4:17 PM; Average background @ 8…	N:12	ALLLLLAAAAAA	1	Pychron Script	1	Fusions CO2	4.5	0	0	0	0	30	30	152			0
	53	4.5	7.14621	0.010019	0.9305	3.43786	50.9236	96.159	34.5327	0.018313	0.0018433								65737-53	K17-BS-1	37	2017-07-13	11.9833	3582792000	Heizler, M	Sanidine	12	IR1009		129.138.12.160	7.875	Ar40 = L @ 8/7/17 9:45 AM; Ar39 = L @ 8/7/17 9:45 AM; Ar38 = L @ 8/7/17 9:45 AM; Ar37 = L @ 8/7/17 9:45 AM; Ar36 = L @ 8/7/17 9:45 AM; Ar40 = L @ 8/7/17 4:12 PM; Ar39 = L @ 8/7/17 4:12 PM; Ar38 = L @ 8/7/17 4:12 PM; Ar37 = L @ 8/7/17 4:12 PM; Ar36 = L @ 8/7/17 4:12 PM; Ar41 bk val,er = @ 8/7/17 4:17 PM; Average background @ 8/7/17 4:17 PM; Ar40 bk val,er = @ 8/7/17 4:17 PM; Average background @ 8…	N:12	ALLLLLAAAAAA	1	Pychron Script	1	Fusions CO2	4.5	0	0	0	0	30	30	146			0
	85	4.5	7.20241	0.0172669	1.0179	2.35538	29.5481	95.8384	34.6874	0.0220391	0.0018433								65737-85	K17-BS-1	37	2017-07-13	16.8833	3582810000	Heizler, M	Sanidine	12	IR1009		129.138.12.160	7.875	Ar40 = L @ 8/7/17 9:45 AM; Ar39 = L @ 8/7/17 9:45 AM; Ar38 = L @ 8/7/17 9:45 AM; Ar37 = L @ 8/7/17 9:45 AM; Ar36 = L @ 8/7/17 9:45 AM; Ar40 = L @ 8/7/17 4:12 PM; Ar39 = L @ 8/7/17 4:12 PM; Ar38 = L @ 8/7/17 4:12 PM; Ar37 = L @ 8/7/17 4:12 PM; Ar36 = L @ 8/7/17 4:12 PM; Ar41 bk val,er = @ 8/7/17 4:17 PM; Average background @ 8/7/17 4:17 PM; Ar40 bk val,er = @ 8/7/17 4:17 PM; Average background @ 8…	N:12	ALLLLLAAAAAA	1	Pychron Script	1	Fusions CO2	4.5	0	0	0	0	30	30	178			0
	38	4.5	7.15821	0.0062243	0.77	3.61199	81.9697	96.8246	34.8273	0.0171167	0.0018433								65737-38	K17-BS-1	37	2017-07-13	9.43333	3582783000	Heizler, M	Sanidine	12	IR1009		129.138.12.160	7.875	Ar40 = L @ 8/7/17 9:45 AM; Ar39 = L @ 8/7/17 9:45 AM; Ar38 = L @ 8/7/17 9:45 AM; Ar37 = L @ 8/7/17 9:45 AM; Ar36 = L @ 8/7/17 9:45 AM; Ar40 = L @ 8/7/17 4:11 PM; Ar39 = L @ 8/7/17 4:11 PM; Ar38 = L @ 8/7/17 4:11 PM; Ar37 = L @ 8/7/17 4:11 PM; Ar36 = L @ 8/7/17 4:11 PM; Ar41 bk val,er = @ 8/7/17 4:17 PM; Average background @ 8/7/17 4:17 PM; Ar40 bk val,er = @ 8/7/17 4:17 PM; Average background @ 8…	N:12	ALLLLLAAAAAA	1	Pychron Script	1	Fusions CO2	4.5	0	0	0	0	30	30	131			0
	57	4.5	7.05471	0.0061568	0.3888	6.14009	82.8684	98.3765	34.8728	0.0098397	0.0018433								65737-57	K17-BS-1	37	2017-07-13	12.4333	3582794000	Heizler, M	Sanidine	12	IR1009		129.138.12.160	7.875	Ar40 = L @ 8/7/17 9:45 AM; Ar39 = L @ 8/7/17 9:45 AM; Ar38 = L @ 8/7/17 9:45 AM; Ar37 = L @ 8/7/17 9:45 AM; Ar36 = L @ 8/7/17 9:45 AM; Ar40 = L @ 8/7/17 4:12 PM; Ar39 = L @ 8/7/17 4:12 PM; Ar38 = L @ 8/7/17 4:12 PM; Ar37 = L @ 8/7/17 4:12 PM; Ar36 = L @ 8/7/17 4:12 PM; Ar41 bk val,er = @ 8/7/17 4:17 PM; Average background @ 8/7/17 4:17 PM; Ar40 bk val,er = @ 8/7/17 4:17 PM; Average background @ 8…	N:12	ALLLLLAAAAAA	1	Pychron Script	1	Fusions CO2	4.5	0	0	0	0	30	30	150			0
	37	4.5	6.97877	0.005943	0.1093	4.31002	85.8496	99.5438	34.906	0.0107267	0.0018433								65737-37	K17-BS-1	37	2017-07-13	9.31667	3582782000	Heizler, M	Sanidine	12	IR1009		129.138.12.160	7.875	Ar40 = L @ 8/7/17 9:45 AM; Ar39 = L @ 8/7/17 9:45 AM; Ar38 = L @ 8/7/17 9:45 AM; Ar37 = L @ 8/7/17 9:45 AM; Ar36 = L @ 8/7/17 9:45 AM; Ar40 = L @ 8/7/17 4:11 PM; Ar39 = L @ 8/7/17 4:11 PM; Ar38 = L @ 8/7/17 4:11 PM; Ar37 = L @ 8/7/17 4:11 PM; Ar36 = L @ 8/7/17 4:11 PM; Ar41 bk val,er = @ 8/7/17 4:17 PM; Average background @ 8/7/17 4:17 PM; Ar40 bk val,er = @ 8/7/17 4:17 PM; Average background @ 8…	N:12	ALLLLLAAAAAA	1	Pychron Script	1	Fusions CO2	4.5	0	0	0	0	30	30	130			0
	87	4.5	7.06631	0.0071406	0.3814	2.88815	71.4511	98.4114	34.942	0.0162052	0.0018433								65737-87	K17-BS-1	37	2017-07-13	17.1	3582810000	Heizler, M	Sanidine	12	IR1009		129.138.12.160	7.875	Ar40 = L @ 8/7/17 9:45 AM; Ar39 = L @ 8/7/17 9:45 AM; Ar38 = L @ 8/7/17 9:45 AM; Ar37 = L @ 8/7/17 9:45 AM; Ar36 = L @ 8/7/17 9:45 AM; Ar40 = L @ 8/7/17 4:12 PM; Ar39 = L @ 8/7/17 4:12 PM; Ar38 = L @ 8/7/17 4:12 PM; Ar37 = L @ 8/7/17 4:12 PM; Ar36 = L @ 8/7/17 4:12 PM; Ar41 bk val,er = @ 8/7/17 4:17 PM; Average background @ 8/7/17 4:17 PM; Ar40 bk val,er = @ 8/7/17 4:17 PM; Average background @ 8…	N:12	ALLLLLAAAAAA	1	Pychron Script	1	Fusions CO2	4.5	0	0	0	0	30	30	180			0
	20	4.5	9.14895	0.0346392	7.2048	1.14527	14.7291	76.7378	35.2843	0.0615608	0.0018433								65737-20	K17-BS-1	37	2017-07-13	5.7	3582769000	Heizler, M	Sanidine	12	IR1009		129.138.12.160	7.875	Ar40 = L @ 8/7/17 9:45 AM; Ar39 = L @ 8/7/17 9:45 AM; Ar38 = L @ 8/7/17 9:45 AM; Ar37 = L @ 8/7/17 9:45 AM; Ar36 = L @ 8/7/17 9:45 AM; Ar40 = L @ 8/7/17 4:11 PM; Ar39 = L @ 8/7/17 4:11 PM; Ar38 = L @ 8/7/17 4:11 PM; Ar37 = L @ 8/7/17 4:11 PM; Ar36 = L @ 8/7/17 4:11 PM; Ar41 bk val,er = @ 8/7/17 4:17 PM; Average background @ 8/7/17 4:17 PM; Ar40 bk val,er = @ 8/7/17 4:17 PM; Average background @ 8…	N:12	ALLLLLAAAAAA	1	Pychron Script	1	Fusions CO2	4.5	0	0	0	0	30	30	113			0
	13	4.5	7.16996	0.0082591	0.4912	9.01933	61.7748	97.9824	35.2972	0.0080432	0.0018433								65737-13	K17-BS-1	37	2017-07-13	4.48333	3582765000	Heizler, M	Sanidine	12	IR1009		129.138.12.160	7.875	Ar40 = L @ 8/7/17 9:45 AM; Ar39 = L @ 8/7/17 9:45 AM; Ar38 = L @ 8/7/17 9:45 AM; Ar37 = L @ 8/7/17 9:45 AM; Ar36 = L @ 8/7/17 9:45 AM; Ar40 = L @ 8/7/17 4:11 PM; Ar39 = L @ 8/7/17 4:11 PM; Ar38 = L @ 8/7/17 4:11 PM; Ar37 = L @ 8/7/17 4:11 PM; Ar36 = L @ 8/7/17 4:11 PM; Ar41 bk val,er = @ 8/7/17 4:17 PM; Average background @ 8/7/17 4:17 PM; Ar40 bk val,er = @ 8/7/17 4:17 PM; Average background @ 8…	N:12	ALLLLLAAAAAA	1	Pychron Script	1	Fusions CO2	4.5	0	0	0	0	30	30	106			0
	60	4.5	9.81325	0.0264513	9.4296	1.35813	19.2884	71.6017	35.315	0.0787737	0.0018433								65737-60	K17-BS-1	37	2017-07-13	12.9833	3582796000	Heizler, M	Sanidine	12	IR1009		129.138.12.160	7.875	Ar40 = L @ 8/7/17 9:45 AM; Ar39 = L @ 8/7/17 9:45 AM; Ar38 = L @ 8/7/17 9:45 AM; Ar37 = L @ 8/7/17 9:45 AM; Ar36 = L @ 8/7/17 9:45 AM; Ar40 = L @ 8/7/17 4:12 PM; Ar39 = L @ 8/7/17 4:12 PM; Ar38 = L @ 8/7/17 4:12 PM; Ar37 = L @ 8/7/17 4:12 PM; Ar36 = L @ 8/7/17 4:12 PM; Ar41 bk val,er = @ 8/7/17 4:17 PM; Average background @ 8/7/17 4:17 PM; Ar40 bk val,er = @ 8/7/17 4:17 PM; Average background @ 8…	N:12	ALLLLLAAAAAA	1	Pychron Script	1	Fusions CO2	4.5	0	0	0	0	30	30	153			0
	14	4.5	7.15004	0.0061489	0.3285	6.33095	82.9748	98.6479	35.4367	0.009213	0.0018433								65737-14	K17-BS-1	37	2017-07-13	4.6	3582765000	Heizler, M	Sanidine	12	IR1009		129.138.12.160	7.875	Ar40 = L @ 8/7/17 9:45 AM; Ar39 = L @ 8/7/17 9:45 AM; Ar38 = L @ 8/7/17 9:45 AM; Ar37 = L @ 8/7/17 9:45 AM; Ar36 = L @ 8/7/17 9:45 AM; Ar40 = L @ 8/7/17 4:11 PM; Ar39 = L @ 8/7/17 4:11 PM; Ar38 = L @ 8/7/17 4:11 PM; Ar37 = L @ 8/7/17 4:11 PM; Ar36 = L @ 8/7/17 4:11 PM; Ar41 bk val,er = @ 8/7/17 4:17 PM; Average background @ 8/7/17 4:17 PM; Ar40 bk val,er = @ 8/7/17 4:17 PM; Average background @ 8…	N:12	ALLLLLAAAAAA	1	Pychron Script	1	Fusions CO2	4.5	0	0	0	0	30	30	107			0
	67	4.5	7.12096	0.0035999	0.2218	4.62893	141.727	99.0828	35.4479	0.0119651	0.0018433								65737-67	K17-BS-1	37	2017-07-13	14.2	3582800000	Heizler, M	Sanidine	12	IR1009		129.138.12.160	7.875	Ar40 = L @ 8/7/17 9:45 AM; Ar39 = L @ 8/7/17 9:45 AM; Ar38 = L @ 8/7/17 9:45 AM; Ar37 = L @ 8/7/17 9:45 AM; Ar36 = L @ 8/7/17 9:45 AM; Ar40 = L @ 8/7/17 4:12 PM; Ar39 = L @ 8/7/17 4:12 PM; Ar38 = L @ 8/7/17 4:12 PM; Ar37 = L @ 8/7/17 4:12 PM; Ar36 = L @ 8/7/17 4:12 PM; Ar41 bk val,er = @ 8/7/17 4:17 PM; Average background @ 8/7/17 4:17 PM; Ar40 bk val,er = @ 8/7/17 4:17 PM; Average background @ 8…	N:12	ALLLLLAAAAAA	1	Pychron Script	1	Fusions CO2	4.5	0	0	0	0	30	30	160			0
	23	4.5	7.72197	0.0034866	0.3885	3.27103	146.333	98.5155	38.1945	0.0144685	0.0018433								65737-23	K17-BS-1	37	2017-07-13	6.03333	3582771000	Heizler, M	Sanidine	12	IR1009		129.138.12.160	7.875	Ar40 = L @ 8/7/17 9:45 AM; Ar39 = L @ 8/7/17 9:45 AM; Ar38 = L @ 8/7/17 9:45 AM; Ar37 = L @ 8/7/17 9:45 AM; Ar36 = L @ 8/7/17 9:45 AM; Ar40 = L @ 8/7/17 4:11 PM; Ar39 = L @ 8/7/17 4:11 PM; Ar38 = L @ 8/7/17 4:11 PM; Ar37 = L @ 8/7/17 4:11 PM; Ar36 = L @ 8/7/17 4:11 PM; Ar41 bk val,er = @ 8/7/17 4:17 PM; Average background @ 8/7/17 4:17 PM; Ar40 bk val,er = @ 8/7/17 4:17 PM; Average background @ 8…	N:12	ALLLLLAAAAAA	1	Pychron Script	1	Fusions CO2	4.5	0	0	0	0	30	30	116			0
	01	4.5	8.27518	0.0182625	0.3281	0.552228	27.9372	98.8452	41.0392	0.0623585	0.0018433								65737-01	K17-BS-1	37	2017-07-13	2.26667	3582757000	Heizler, M	Sanidine	12	IR1009		129.138.12.160	7.875	Ar40 = L @ 8/7/17 9:44 AM; Ar39 = L @ 8/7/17 9:44 AM; Ar38 = L @ 8/7/17 9:44 AM; Ar37 = L @ 8/7/17 9:44 AM; Ar36 = L @ 8/7/17 9:44 AM; Ar40 = L @ 8/7/17 4:11 PM; Ar39 = L @ 8/7/17 4:11 PM; Ar38 = L @ 8/7/17 4:11 PM; Ar37 = L @ 8/7/17 4:11 PM; Ar36 = L @ 8/7/17 4:11 PM; Ar41 bk val,er = @ 8/7/17 4:17 PM; Average background @ 8/7/17 4:17 PM; Ar40 bk val,er = @ 8/7/17 4:17 PM; Average background @ 8…	N:12	ALLLLLAAAAAA	1	Pychron Script	1	Fusions CO2	4.5	0	0	0	0	30	30	94			0
	09	4.5	8.54386	0.004862	0.1959	9.52004	104.937	99.3265	42.5613	0.0079737	0.0018433								65737-09	K17-BS-1	37	2017-07-13	4.03333	3582763000	Heizler, M	Sanidine	12	IR1009		129.138.12.160	7.875	Ar40 = L @ 8/7/17 9:44 AM; Ar39 = L @ 8/7/17 9:44 AM; Ar38 = L @ 8/7/17 9:44 AM; Ar37 = L @ 8/7/17 9:44 AM; Ar36 = L @ 8/7/17 9:44 AM; Ar40 = L @ 8/7/17 4:11 PM; Ar39 = L @ 8/7/17 4:11 PM; Ar38 = L @ 8/7/17 4:11 PM; Ar37 = L @ 8/7/17 4:11 PM; Ar36 = L @ 8/7/17 4:11 PM; Ar41 bk val,er = @ 8/7/17 4:17 PM; Average background @ 8/7/17 4:17 PM; Ar40 bk val,er = @ 8/7/17 4:17 PM; Average background @ 8…	N:12	ALLLLLAAAAAA	1	Pychron Script	1	Fusions CO2	4.5	0	0	0	0	30	30	102			0
	41	4.5	8.56771	0.0057841	0.1976	11.1271	88.208	99.3233	42.6775	0.0075364	0.0018433								65737-41	K17-BS-1	37	2017-07-13	9.98333	3582785000	Heizler, M	Sanidine	12	IR1009		129.138.12.160	7.875	Ar40 = L @ 8/7/17 9:45 AM; Ar39 = L @ 8/7/17 9:45 AM; Ar38 = L @ 8/7/17 9:45 AM; Ar37 = L @ 8/7/17 9:45 AM; Ar36 = L @ 8/7/17 9:45 AM; Ar40 = L @ 8/7/17 4:12 PM; Ar39 = L @ 8/7/17 4:12 PM; Ar38 = L @ 8/7/17 4:12 PM; Ar37 = L @ 8/7/17 4:12 PM; Ar36 = L @ 8/7/17 4:12 PM; Ar41 bk val,er = @ 8/7/17 4:17 PM; Average background @ 8/7/17 4:17 PM; Ar40 bk val,er = @ 8/7/17 4:17 PM; Average background @ 8…	N:12	ALLLLLAAAAAA	1	Pychron Script	1	Fusions CO2	4.5	0	0	0	0	30	30	134			0
	74	4.5	8.54536	0.0016332	0.0426	2.42644	312.395	99.8544	42.7922	0.0188901	0.0018433								65737-74	K17-BS-1	37	2017-07-13	15.4167	3582804000	Heizler, M	Sanidine	12	IR1009		129.138.12.160	7.875	Ar40 = L @ 8/7/17 9:45 AM; Ar39 = L @ 8/7/17 9:45 AM; Ar38 = L @ 8/7/17 9:45 AM; Ar37 = L @ 8/7/17 9:45 AM; Ar36 = L @ 8/7/17 9:45 AM; Ar40 = L @ 8/7/17 4:12 PM; Ar39 = L @ 8/7/17 4:12 PM; Ar38 = L @ 8/7/17 4:12 PM; Ar37 = L @ 8/7/17 4:12 PM; Ar36 = L @ 8/7/17 4:12 PM; Ar41 bk val,er = @ 8/7/17 4:17 PM; Average background @ 8/7/17 4:17 PM; Ar40 bk val,er = @ 8/7/17 4:17 PM; Average background @ 8…	N:12	ALLLLLAAAAAA	1	Pychron Script	1	Fusions CO2	4.5	0	0	0	0	30	30	167			0
	52	4.5	8.7453	0.0031227	0.1936	2.19422	163.386	99.3482	43.5633	0.0208953	0.0018433								65737-52	K17-BS-1	37	2017-07-13	11.8667	3582792000	Heizler, M	Sanidine	12	IR1009		129.138.12.160	7.875	Ar40 = L @ 8/7/17 9:45 AM; Ar39 = L @ 8/7/17 9:45 AM; Ar38 = L @ 8/7/17 9:45 AM; Ar37 = L @ 8/7/17 9:45 AM; Ar36 = L @ 8/7/17 9:45 AM; Ar40 = L @ 8/7/17 4:12 PM; Ar39 = L @ 8/7/17 4:12 PM; Ar38 = L @ 8/7/17 4:12 PM; Ar37 = L @ 8/7/17 4:12 PM; Ar36 = L @ 8/7/17 4:12 PM; Ar41 bk val,er = @ 8/7/17 4:17 PM; Average background @ 8/7/17 4:17 PM; Ar40 bk val,er = @ 8/7/17 4:17 PM; Average background @ 8…	N:12	ALLLLLAAAAAA	1	Pychron Script	1	Fusions CO2	4.5	0	0	0	0	30	30	145			0
	50	4.5	8.78148	0.0032524	0.2091	4.67073	156.87	99.2989	43.7201	0.0124254	0.0018433								65737-50	K17-BS-1	37	2017-07-13	11.4333	3582790000	Heizler, M	Sanidine	12	IR1009		129.138.12.160	7.875	Ar40 = L @ 8/7/17 9:45 AM; Ar39 = L @ 8/7/17 9:45 AM; Ar38 = L @ 8/7/17 9:45 AM; Ar37 = L @ 8/7/17 9:45 AM; Ar36 = L @ 8/7/17 9:45 AM; Ar40 = L @ 8/7/17 4:12 PM; Ar39 = L @ 8/7/17 4:12 PM; Ar38 = L @ 8/7/17 4:12 PM; Ar37 = L @ 8/7/17 4:12 PM; Ar36 = L @ 8/7/17 4:12 PM; Ar41 bk val,er = @ 8/7/17 4:17 PM; Average background @ 8/7/17 4:17 PM; Ar40 bk val,er = @ 8/7/17 4:17 PM; Average background @ 8…	N:12	ALLLLLAAAAAA	1	Pychron Script	1	Fusions CO2	4.5	0	0	0	0	30	30	143			0
	43	4.5	9.13313	0.0189195	0.8826	6.75803	26.9671	97.1585	44.4837	0.0123761	0.0018433								65737-43	K17-BS-1	37	2017-07-13	10.2	3582786000	Heizler, M	Sanidine	12	IR1009		129.138.12.160	7.875	Ar40 = L @ 8/7/17 9:45 AM; Ar39 = L @ 8/7/17 9:45 AM; Ar38 = L @ 8/7/17 9:45 AM; Ar37 = L @ 8/7/17 9:45 AM; Ar36 = L @ 8/7/17 9:45 AM; Ar40 = L @ 8/7/17 4:12 PM; Ar39 = L @ 8/7/17 4:12 PM; Ar38 = L @ 8/7/17 4:12 PM; Ar37 = L @ 8/7/17 4:12 PM; Ar36 = L @ 8/7/17 4:12 PM; Ar41 bk val,er = @ 8/7/17 4:17 PM; Average background @ 8/7/17 4:17 PM; Ar40 bk val,er = @ 8/7/17 4:17 PM; Average background @ 8…	N:12	ALLLLLAAAAAA	1	Pychron Script	1	Fusions CO2	4.5	0	0	0	0	30	30	136			0
	05	4.5	9.36531	0.0267924	0.6534	2.78039	19.0429	97.9598	45.9733	0.0209479	0.0018433								65737-05	K17-BS-1	37	2017-07-13	3.35	3582761000	Heizler, M	Sanidine	12	IR1009		129.138.12.160	7.875	Ar40 = L @ 8/7/17 9:44 AM; Ar39 = L @ 8/7/17 9:44 AM; Ar38 = L @ 8/7/17 9:44 AM; Ar37 = L @ 8/7/17 9:44 AM; Ar36 = L @ 8/7/17 9:44 AM; Ar40 = L @ 8/7/17 4:11 PM; Ar39 = L @ 8/7/17 4:11 PM; Ar38 = L @ 8/7/17 4:11 PM; Ar37 = L @ 8/7/17 4:11 PM; Ar36 = L @ 8/7/17 4:11 PM; Ar41 bk val,er = @ 8/7/17 4:17 PM; Average background @ 8/7/17 4:17 PM; Ar40 bk val,er = @ 8/7/17 4:17 PM; Average background @ 8…	N:12	ALLLLLAAAAAA	1	Pychron Script	1	Fusions CO2	4.5	0	0	0	0	30	30	98			0
	45	4.5	9.80589	0.0060812	0.6968	1.78359	83.8986	97.9033	48.0818	0.0293741	0.0018433								65737-45	K17-BS-1	37	2017-07-13	10.4333	3582786000	Heizler, M	Sanidine	12	IR1009		129.138.12.160	7.875	Ar40 = L @ 8/7/17 9:45 AM; Ar39 = L @ 8/7/17 9:45 AM; Ar38 = L @ 8/7/17 9:45 AM; Ar37 = L @ 8/7/17 9:45 AM; Ar36 = L @ 8/7/17 9:45 AM; Ar40 = L @ 8/7/17 4:12 PM; Ar39 = L @ 8/7/17 4:12 PM; Ar38 = L @ 8/7/17 4:12 PM; Ar37 = L @ 8/7/17 4:12 PM; Ar36 = L @ 8/7/17 4:12 PM; Ar41 bk val,er = @ 8/7/17 4:17 PM; Average background @ 8/7/17 4:17 PM; Ar40 bk val,er = @ 8/7/17 4:17 PM; Average background @ 8…	N:12	ALLLLLAAAAAA	1	Pychron Script	1	Fusions CO2	4.5	0	0	0	0	30	30	138			0
	83	4.5	9.66867	0.006954	0.0859	7.02456	73.3684	99.7433	48.2965	0.009991	0.0018433								65737-83	K17-BS-1	37	2017-07-13	16.65	3582809000	Heizler, M	Sanidine	12	IR1009		129.138.12.160	7.875	Ar40 = L @ 8/7/17 9:45 AM; Ar39 = L @ 8/7/17 9:45 AM; Ar38 = L @ 8/7/17 9:45 AM; Ar37 = L @ 8/7/17 9:45 AM; Ar36 = L @ 8/7/17 9:45 AM; Ar40 = L @ 8/7/17 4:12 PM; Ar39 = L @ 8/7/17 4:12 PM; Ar38 = L @ 8/7/17 4:12 PM; Ar37 = L @ 8/7/17 4:12 PM; Ar36 = L @ 8/7/17 4:12 PM; Ar41 bk val,er = @ 8/7/17 4:17 PM; Average background @ 8/7/17 4:17 PM; Ar40 bk val,er = @ 8/7/17 4:17 PM; Average background @ 8…	N:12	ALLLLLAAAAAA	1	Pychron Script	1	Fusions CO2	4.5	0	0	0	0	30	30	176			0
	51	4.5	11.6007	0.0250319	1.4318	1.28772	20.3822	96.3675	55.879	0.0449361	0.0018433								65737-51	K17-BS-1	37	2017-07-13	11.55	3582790000	Heizler, M	Sanidine	12	IR1009		129.138.12.160	7.875	Ar40 = L @ 8/7/17 9:45 AM; Ar39 = L @ 8/7/17 9:45 AM; Ar38 = L @ 8/7/17 9:45 AM; Ar37 = L @ 8/7/17 9:45 AM; Ar36 = L @ 8/7/17 9:45 AM; Ar40 = L @ 8/7/17 4:12 PM; Ar39 = L @ 8/7/17 4:12 PM; Ar38 = L @ 8/7/17 4:12 PM; Ar37 = L @ 8/7/17 4:12 PM; Ar36 = L @ 8/7/17 4:12 PM; Ar41 bk val,er = @ 8/7/17 4:17 PM; Average background @ 8/7/17 4:17 PM; Ar40 bk val,er = @ 8/7/17 4:17 PM; Average background @ 8…	N:12	ALLLLLAAAAAA	1	Pychron Script	1	Fusions CO2	4.5	0	0	0	0	30	30	144			0
	35	4.5	11.4078	0.0068663	0.134	11.0012	74.3055	99.6575	56.8099	0.0082806	0.0018433								65737-35	K17-BS-1	37	2017-07-13	9.08333	3582782000	Heizler, M	Sanidine	12	IR1009		129.138.12.160	7.875	Ar40 = L @ 8/7/17 9:45 AM; Ar39 = L @ 8/7/17 9:45 AM; Ar38 = L @ 8/7/17 9:45 AM; Ar37 = L @ 8/7/17 9:45 AM; Ar36 = L @ 8/7/17 9:45 AM; Ar40 = L @ 8/7/17 4:11 PM; Ar39 = L @ 8/7/17 4:11 PM; Ar38 = L @ 8/7/17 4:11 PM; Ar37 = L @ 8/7/17 4:11 PM; Ar36 = L @ 8/7/17 4:11 PM; Ar41 bk val,er = @ 8/7/17 4:17 PM; Average background @ 8/7/17 4:17 PM; Ar40 bk val,er = @ 8/7/17 4:17 PM; Average background @ 8…	N:12	ALLLLLAAAAAA	1	Pychron Script	1	Fusions CO2	4.5	0	0	0	0	30	30	128			0
	34	4.5	14.7447	0.0017905	0.7841	0.984922	284.951	98.4287	72.2274	0.0607515	0.0018433								65737-34	K17-BS-1	37	2017-07-13	8.98333	3582781000	Heizler, M	Sanidine	12	IR1009		129.138.12.160	7.875	Ar40 = L @ 8/7/17 9:45 AM; Ar39 = L @ 8/7/17 9:45 AM; Ar38 = L @ 8/7/17 9:45 AM; Ar37 = L @ 8/7/17 9:45 AM; Ar36 = L @ 8/7/17 9:45 AM; Ar40 = L @ 8/7/17 4:11 PM; Ar39 = L @ 8/7/17 4:11 PM; Ar38 = L @ 8/7/17 4:11 PM; Ar37 = L @ 8/7/17 4:11 PM; Ar36 = L @ 8/7/17 4:11 PM; Ar41 bk val,er = @ 8/7/17 4:17 PM; Average background @ 8/7/17 4:17 PM; Ar40 bk val,er = @ 8/7/17 4:17 PM; Average background @ 8…	N:12	ALLLLLAAAAAA	1	Pychron Script	1	Fusions CO2	4.5	0	0	0	0	30	30	127			0
	32	4.5	14.8481	0.0057765	0.505	2.64972	88.3241	98.9976	73.1368	0.0265922	0.0018433								65737-32	K17-BS-1	37	2017-07-13	8.75	3582780000	Heizler, M	Sanidine	12	IR1009		129.138.12.160	7.875	Ar40 = L @ 8/7/17 9:45 AM; Ar39 = L @ 8/7/17 9:45 AM; Ar38 = L @ 8/7/17 9:45 AM; Ar37 = L @ 8/7/17 9:45 AM; Ar36 = L @ 8/7/17 9:45 AM; Ar40 = L @ 8/7/17 4:11 PM; Ar39 = L @ 8/7/17 4:11 PM; Ar38 = L @ 8/7/17 4:11 PM; Ar37 = L @ 8/7/17 4:11 PM; Ar36 = L @ 8/7/17 4:11 PM; Ar41 bk val,er = @ 8/7/17 4:17 PM; Average background @ 8/7/17 4:17 PM; Ar40 bk val,er = @ 8/7/17 4:17 PM; Average background @ 8…	N:12	ALLLLLAAAAAA	1	Pychron Script	1	Fusions CO2	4.5	0	0	0	0	30	30	125			0
	44	4.5	15.0704	0.0038013	0.0497	5.89897	134.218	99.9047	74.8767	0.0142885	0.0018433								65737-44	K17-BS-1	37	2017-07-13	10.3167	3582786000	Heizler, M	Sanidine	12	IR1009		129.138.12.160	7.875	Ar40 = L @ 8/7/17 9:45 AM; Ar39 = L @ 8/7/17 9:45 AM; Ar38 = L @ 8/7/17 9:45 AM; Ar37 = L @ 8/7/17 9:45 AM; Ar36 = L @ 8/7/17 9:45 AM; Ar40 = L @ 8/7/17 4:12 PM; Ar39 = L @ 8/7/17 4:12 PM; Ar38 = L @ 8/7/17 4:12 PM; Ar37 = L @ 8/7/17 4:12 PM; Ar36 = L @ 8/7/17 4:12 PM; Ar41 bk val,er = @ 8/7/17 4:17 PM; Average background @ 8/7/17 4:17 PM; Ar40 bk val,er = @ 8/7/17 4:17 PM; Average background @ 8…	N:12	ALLLLLAAAAAA	1	Pychron Script	1	Fusions CO2	4.5	0	0	0	0	30	30	137			0
	31	4.5	15.2564	0.0052189	0.1028	1.55857	97.7608	99.8037	75.7071	0.037796	0.0018433								65737-31	K17-BS-1	37	2017-07-13	8.43333	3582779000	Heizler, M	Sanidine	12	IR1009		129.138.12.160	7.875	Ar40 = L @ 8/7/17 9:45 AM; Ar39 = L @ 8/7/17 9:45 AM; Ar38 = L @ 8/7/17 9:45 AM; Ar37 = L @ 8/7/17 9:45 AM; Ar36 = L @ 8/7/17 9:45 AM; Ar40 = L @ 8/7/17 4:11 PM; Ar39 = L @ 8/7/17 4:11 PM; Ar38 = L @ 8/7/17 4:11 PM; Ar37 = L @ 8/7/17 4:11 PM; Ar36 = L @ 8/7/17 4:11 PM; Ar41 bk val,er = @ 8/7/17 4:17 PM; Average background @ 8/7/17 4:17 PM; Ar40 bk val,er = @ 8/7/17 4:17 PM; Average background @ 8…	N:12	ALLLLLAAAAAA	1	Pychron Script	1	Fusions CO2	4.5	0	0	0	0	30	30	124			0
	10	4.5	15.7684	0.0043473	1.4964	4.46955	117.361	97.1965	76.1953	0.0235539	0.0018433								65737-10	K17-BS-1	37	2017-07-13	4.15	3582764000	Heizler, M	Sanidine	12	IR1009		129.138.12.160	7.875	Ar40 = L @ 8/7/17 9:44 AM; Ar39 = L @ 8/7/17 9:44 AM; Ar38 = L @ 8/7/17 9:44 AM; Ar37 = L @ 8/7/17 9:44 AM; Ar36 = L @ 8/7/17 9:44 AM; Ar40 = L @ 8/7/17 4:11 PM; Ar39 = L @ 8/7/17 4:11 PM; Ar38 = L @ 8/7/17 4:11 PM; Ar37 = L @ 8/7/17 4:11 PM; Ar36 = L @ 8/7/17 4:11 PM; Ar41 bk val,er = @ 8/7/17 4:17 PM; Average background @ 8/7/17 4:17 PM; Ar40 bk val,er = @ 8/7/17 4:17 PM; Average background @ 8…	N:12	ALLLLLAAAAAA	1	Pychron Script	1	Fusions CO2	4.5	0	0	0	0	30	30	103			0
	73	4.5	15.4463	0.004534	0.3936	2.29489	112.528	99.249	76.2135	0.0333476	0.0018433								65737-73	K17-BS-1	37	2017-07-13	15.1	3582803000	Heizler, M	Sanidine	12	IR1009		129.138.12.160	7.875	Ar40 = L @ 8/7/17 9:45 AM; Ar39 = L @ 8/7/17 9:45 AM; Ar38 = L @ 8/7/17 9:45 AM; Ar37 = L @ 8/7/17 9:45 AM; Ar36 = L @ 8/7/17 9:45 AM; Ar40 = L @ 8/7/17 4:12 PM; Ar39 = L @ 8/7/17 4:12 PM; Ar38 = L @ 8/7/17 4:12 PM; Ar37 = L @ 8/7/17 4:12 PM; Ar36 = L @ 8/7/17 4:12 PM; Ar41 bk val,er = @ 8/7/17 4:17 PM; Average background @ 8/7/17 4:17 PM; Ar40 bk val,er = @ 8/7/17 4:17 PM; Average background @ 8…	N:12	ALLLLLAAAAAA	1	Pychron Script	1	Fusions CO2	4.5	0	0	0	0	30	30	166			0
	16	4.5	15.9402	0.0039685	0.198	2.58819	128.563	99.6349	78.8994	0.0297731	0.0018433								65737-16	K17-BS-1	37	2017-07-13	5.03333	3582767000	Heizler, M	Sanidine	12	IR1009		129.138.12.160	7.875	Ar40 = L @ 8/7/17 9:45 AM; Ar39 = L @ 8/7/17 9:45 AM; Ar38 = L @ 8/7/17 9:45 AM; Ar37 = L @ 8/7/17 9:45 AM; Ar36 = L @ 8/7/17 9:45 AM; Ar40 = L @ 8/7/17 4:11 PM; Ar39 = L @ 8/7/17 4:11 PM; Ar38 = L @ 8/7/17 4:11 PM; Ar37 = L @ 8/7/17 4:11 PM; Ar36 = L @ 8/7/17 4:11 PM; Ar41 bk val,er = @ 8/7/17 4:17 PM; Average background @ 8/7/17 4:17 PM; Ar40 bk val,er = @ 8/7/17 4:17 PM; Average background @ 8…	N:12	ALLLLLAAAAAA	1	Pychron Script	1	Fusions CO2	4.5	0	0	0	0	30	30	109			0
	04	4.5	48.7663	0.0134813	11.7492	0.445754	37.8453	92.8817	216.68	0.343144	0.0018433								65737-04	K17-BS-1	37	2017-07-13	3.23333	3582760000	Heizler, M	Sanidine	12	IR1009		129.138.12.160	7.875	Ar40 = L @ 8/7/17 9:44 AM; Ar39 = L @ 8/7/17 9:44 AM; Ar38 = L @ 8/7/17 9:44 AM; Ar37 = L @ 8/7/17 9:44 AM; Ar36 = L @ 8/7/17 9:44 AM; Ar40 = L @ 8/7/17 4:11 PM; Ar39 = L @ 8/7/17 4:11 PM; Ar38 = L @ 8/7/17 4:11 PM; Ar37 = L @ 8/7/17 4:11 PM; Ar36 = L @ 8/7/17 4:11 PM; Ar41 bk val,er = @ 8/7/17 4:17 PM; Average background @ 8/7/17 4:17 PM; Ar40 bk val,er = @ 8/7/17 4:17 PM; Average background @ 8…	N:12	ALLLLLAAAAAA	1	Pychron Script	1	Fusions CO2	4.5	0	0	0	0	30	30	97			0
	33	4.5	95.0479	0.0046406	9.6992	1.4973	109.944	96.9847	416.884	0.222376	0.0018433								65737-33	K17-BS-1	37	2017-07-13	8.86667	3582781000	Heizler, M	Sanidine	12	IR1009		129.138.12.160	7.875	Ar40 = L @ 8/7/17 9:45 AM; Ar39 = L @ 8/7/17 9:45 AM; Ar38 = L @ 8/7/17 9:45 AM; Ar37 = L @ 8/7/17 9:45 AM; Ar36 = L @ 8/7/17 9:45 AM; Ar40 = L @ 8/7/17 4:11 PM; Ar39 = L @ 8/7/17 4:11 PM; Ar38 = L @ 8/7/17 4:11 PM; Ar37 = L @ 8/7/17 4:11 PM; Ar36 = L @ 8/7/17 4:11 PM; Ar41 bk val,er = @ 8/7/17 4:17 PM; Average background @ 8/7/17 4:17 PM; Ar40 bk val,er = @ 8/7/17 4:17 PM; Average background @ 8…	N:12	ALLLLLAAAAAA	1	Pychron Script	1	Fusions CO2	4.5	0	0	0	0	30	30	126			0
				n=86
	RC16-HM-129, Sanidine, J=0.0039443±0.02%, IC=1.023121±0.0016219, NM-284C, Lab#=65077, Argus VI
	28	4	0.696292	0.0014518	0.0038514	0.166481	351.429	99.8521	4.9588	0.202259	0.0016219								65077-28	RC16-HM-129	37	2016-07-15	16.9667	3551447000		Sanidine	12	Crow01148		129.138.12.160	7.875	Ar40 bk val,er = @ 7/19/16 2:50 PM; Parabolic @ 7/19/16 2:50 PM; Ar39 bk val,er = @ 7/19/16 2:50 PM; Average background @ 7/19/16 2:50 PM; Ar38 bk val,er = @ 7/19/16 2:50 PM; Average background @ 7/19/16 2:50 PM; Ar37 bk val,er = @ 7/19/16 2:50 PM; Average background @ 7/19/16 2:50 PM; Ar36 bk val,er = @ 7/19/16 2:50 PM; Parabolic @ 7/19/16 2:50 PM; Detector intercalibration obtained from Weighte…	C12:284	LPPLLPAAAAAA	1	Pychron Script	1	Fusions CO2	4	4	0	4	0	30	30	129			0
	35	4	2.23887	0.0114047	0.1821	1.56702	44.7363	97.6266	15.6609	0.0235062	0.0016219								65077-35	RC16-HM-129	37	2016-07-15	19.8333	3551457000		Sanidine	12	Crow01148		129.138.12.160	7.875	Ar40 bk val,er = @ 7/19/16 2:50 PM; Parabolic @ 7/19/16 2:50 PM; Ar39 bk val,er = @ 7/19/16 2:50 PM; Average background @ 7/19/16 2:50 PM; Ar38 bk val,er = @ 7/19/16 2:50 PM; Average background @ 7/19/16 2:50 PM; Ar37 bk val,er = @ 7/19/16 2:50 PM; Average background @ 7/19/16 2:50 PM; Ar36 bk val,er = @ 7/19/16 2:50 PM; Parabolic @ 7/19/16 2:50 PM; Detector intercalibration obtained from Weighte…	C12:284	LPPLLPAAAAAA	1	Pychron Script	1	Fusions CO2	4	4	0	4	0	30	30	136			0
	34	4	3.2733	0.0277599	1.2177	0.0377249	18.3792	89.0557	20.8793	2.55494	0.0016219								65077-34	RC16-HM-129	37	2016-07-15	19.6167	3551456000		Sanidine	12	Crow01148		129.138.12.160	7.875	Ar40 bk val,er = @ 7/19/16 2:50 PM; Parabolic @ 7/19/16 2:50 PM; Ar39 bk val,er = @ 7/19/16 2:50 PM; Average background @ 7/19/16 2:50 PM; Ar38 bk val,er = @ 7/19/16 2:50 PM; Average background @ 7/19/16 2:50 PM; Ar37 bk val,er = @ 7/19/16 2:50 PM; Average background @ 7/19/16 2:50 PM; Ar36 bk val,er = @ 7/19/16 2:50 PM; Parabolic @ 7/19/16 2:50 PM; Detector intercalibration obtained from Weighte…	C12:284	LPPLLPAAAAAA	1	Pychron Script	1	Fusions CO2	4	4	0	4	0	30	30	135			0
	32	4	3.63755	0.0178376	1.7021	0.0417878	28.6027	86.1819	22.4493	2.95011	0.0016219								65077-32	RC16-HM-129	37	2016-07-15	19.3	3551455000		Sanidine	12	Crow01148		129.138.12.160	7.875	Ar40 bk val,er = @ 7/19/16 2:50 PM; Parabolic @ 7/19/16 2:50 PM; Ar39 bk val,er = @ 7/19/16 2:50 PM; Average background @ 7/19/16 2:50 PM; Ar38 bk val,er = @ 7/19/16 2:50 PM; Average background @ 7/19/16 2:50 PM; Ar37 bk val,er = @ 7/19/16 2:50 PM; Average background @ 7/19/16 2:50 PM; Ar36 bk val,er = @ 7/19/16 2:50 PM; Parabolic @ 7/19/16 2:50 PM; Detector intercalibration obtained from Weighte…	C12:284	LPPLLPAAAAAA	1	Pychron Script	1	Fusions CO2	4	4	0	4	0	30	30	133			0
	17	4	3.23828	0.0123702	-0.0316	0.269738	41.2446	100.318	23.2521	0.12774	0.0016219								65077-17	RC16-HM-129	37	2016-07-15	14.3833	3551437000		Sanidine	12	Crow01148		129.138.12.160	7.875	Ar40 bk val,er = @ 7/19/16 2:50 PM; Parabolic @ 7/19/16 2:50 PM; Ar39 bk val,er = @ 7/19/16 2:50 PM; Average background @ 7/19/16 2:50 PM; Ar38 bk val,er = @ 7/19/16 2:50 PM; Average background @ 7/19/16 2:50 PM; Ar37 bk val,er = @ 7/19/16 2:50 PM; Average background @ 7/19/16 2:50 PM; Ar36 bk val,er = @ 7/19/16 2:50 PM; Parabolic @ 7/19/16 2:50 PM; Detector intercalibration obtained from Weighte…	C12:284	LPPLLPAAAAAA	1	Pychron Script	1	Fusions CO2	4	4	0	4	0	30	30	118			0
	19	4	3.28107	0.0161294	0.0558	0.148455	31.6319	99.5341	23.3753	0.233151	0.0016219								65077-19	RC16-HM-129	37	2016-07-15	14.8167	3551439000		Sanidine	12	Crow01148		129.138.12.160	7.875	Ar40 bk val,er = @ 7/19/16 2:50 PM; Parabolic @ 7/19/16 2:50 PM; Ar39 bk val,er = @ 7/19/16 2:50 PM; Average background @ 7/19/16 2:50 PM; Ar38 bk val,er = @ 7/19/16 2:50 PM; Average background @ 7/19/16 2:50 PM; Ar37 bk val,er = @ 7/19/16 2:50 PM; Average background @ 7/19/16 2:50 PM; Ar36 bk val,er = @ 7/19/16 2:50 PM; Parabolic @ 7/19/16 2:50 PM; Detector intercalibration obtained from Weighte…	C12:284	LPPLLPAAAAAA	1	Pychron Script	1	Fusions CO2	4	4	0	4	0	30	30	120			0
	08	4	3.35706	0.0170336	0.2856	0.145507	29.9528	97.5197	23.4335	0.241793	0.0016219								65077-08	RC16-HM-129	37	2016-07-15	12.3	3551430000		Sanidine	12	Crow01148		129.138.12.160	7.875	Ar40 bk val,er = @ 7/19/16 2:50 PM; Parabolic @ 7/19/16 2:50 PM; Ar39 bk val,er = @ 7/19/16 2:50 PM; Average background @ 7/19/16 2:50 PM; Ar38 bk val,er = @ 7/19/16 2:50 PM; Average background @ 7/19/16 2:50 PM; Ar37 bk val,er = @ 7/19/16 2:50 PM; Average background @ 7/19/16 2:50 PM; Ar36 bk val,er = @ 7/19/16 2:50 PM; Parabolic @ 7/19/16 2:50 PM; Detector intercalibration obtained from Weighte…	C12:284	LPPLLPAAAAAA	1	Pychron Script	1	Fusions CO2	4	4	0	4	0	30	30	109			0
	36	3.5	3.28662	0.0148426	0.0202	0.175952	34.3743	99.8506	23.4886	0.133901	0.0012923								65077-36	RC16-HM-129	37	2016-08-07	7.86667	3553401000		Sanidine	12	Crow01148		129.138.12.160	7.875	Ar41 bk val,er = @ 8/15/16 4:40 PM; Average background @ 8/15/16 4:40 PM; Ar40 bk val,er = @ 8/15/16 4:40 PM; Linear @ 8/15/16 4:40 PM; Ar39 bk val,er = @ 8/15/16 4:40 PM; Average background @ 8/15/16 4:40 PM; Ar38 bk val,er = @ 8/15/16 4:40 PM; Average background @ 8/15/16 4:40 PM; Ar37 bk val,er = @ 8/15/16 4:40 PM; Average background @ 8/15/16 4:40 PM; Ar36 bk val,er = @ 8/15/16 4:40 PM; Linea…	C:12 DS	LPPLLPAAAAAA	1	Pychron Script	1	Fusions CO2	3.5	3.5	0	3.5	0	30	30	131			0
	44	3.5	3.31794	0.0167351	0.1248	0.125395	30.4871	98.9253	23.4933	0.17974	0.0012923								65077-44	RC16-HM-129	37	2016-08-07	9.83333	3553408000		Sanidine	12	Crow01148		129.138.12.160	7.875	Ar41 bk val,er = @ 8/15/16 4:40 PM; Average background @ 8/15/16 4:40 PM; Ar40 bk val,er = @ 8/15/16 4:40 PM; Linear @ 8/15/16 4:40 PM; Ar39 bk val,er = @ 8/15/16 4:40 PM; Average background @ 8/15/16 4:40 PM; Ar38 bk val,er = @ 8/15/16 4:40 PM; Average background @ 8/15/16 4:40 PM; Ar37 bk val,er = @ 8/15/16 4:40 PM; Average background @ 8/15/16 4:40 PM; Ar36 bk val,er = @ 8/15/16 4:40 PM; Linea…	C:12 DS	LPPLLPAAAAAA	1	Pychron Script	1	Fusions CO2	3.5	3.5	0	3.5	0	30	30	139			0
	40	3.5	3.29406	0.0227486	0.0306	0.429385	22.4279	99.7783	23.5248	0.0551346	0.0012923								65077-40	RC16-HM-129	37	2016-08-07	8.96667	3553405000		Sanidine	12	Crow01148		129.138.12.160	7.875	Ar41 bk val,er = @ 8/15/16 4:40 PM; Average background @ 8/15/16 4:40 PM; Ar40 bk val,er = @ 8/15/16 4:40 PM; Linear @ 8/15/16 4:40 PM; Ar39 bk val,er = @ 8/15/16 4:40 PM; Average background @ 8/15/16 4:40 PM; Ar38 bk val,er = @ 8/15/16 4:40 PM; Average background @ 8/15/16 4:40 PM; Ar37 bk val,er = @ 8/15/16 4:40 PM; Average background @ 8/15/16 4:40 PM; Ar36 bk val,er = @ 8/15/16 4:40 PM; Linea…	C:12 DS	LPPLLPAAAAAA	1	Pychron Script	1	Fusions CO2	3.5	3.5	0	3.5	0	30	30	135			0
	07	4	3.29719	0.0166143	0.0149	0.344316	30.7087	99.9051	23.5766	0.0996343	0.0016219								65077-07	RC16-HM-129	37	2016-07-15	11.8833	3551428000		Sanidine	12	Crow01148		129.138.12.160	7.875	Ar40 bk val,er = @ 7/19/16 2:50 PM; Parabolic @ 7/19/16 2:50 PM; Ar39 bk val,er = @ 7/19/16 2:50 PM; Average background @ 7/19/16 2:50 PM; Ar38 bk val,er = @ 7/19/16 2:50 PM; Average background @ 7/19/16 2:50 PM; Ar37 bk val,er = @ 7/19/16 2:50 PM; Average background @ 7/19/16 2:50 PM; Ar36 bk val,er = @ 7/19/16 2:50 PM; Parabolic @ 7/19/16 2:50 PM; Detector intercalibration obtained from Weighte…	C12:284	LPPLLPAAAAAA	1	Pychron Script	1	Fusions CO2	4	4	0	4	0	30	30	108			0
	57	3.5	3.53419	0.052792	0.8161	0.0826777	9.66442	93.2783	23.5991	0.303443	0.0012923								65077-57	RC16-HM-129	37	2016-08-07	13.4333	3553421000		Sanidine	12	Crow01148		129.138.12.160	7.875	Ar41 bk val,er = @ 8/15/16 4:40 PM; Average background @ 8/15/16 4:40 PM; Ar40 bk val,er = @ 8/15/16 4:40 PM; Linear @ 8/15/16 4:40 PM; Ar39 bk val,er = @ 8/15/16 4:40 PM; Average background @ 8/15/16 4:40 PM; Ar38 bk val,er = @ 8/15/16 4:40 PM; Average background @ 8/15/16 4:40 PM; Ar37 bk val,er = @ 8/15/16 4:40 PM; Average background @ 8/15/16 4:40 PM; Ar36 bk val,er = @ 8/15/16 4:40 PM; Linea…	C:12 DS	LPPLLPAAAAAA	1	Pychron Script	1	Fusions CO2	3.5	3.5	0	3.5	0	30	30	152			0
	30	4	3.28853	0.0066657	-0.0326	0.117325	76.5417	100.309	23.6093	0.30035	0.0016219								65077-30	RC16-HM-129	37	2016-07-15	17.3833	3551448000		Sanidine	12	Crow01148		129.138.12.160	7.875	Ar40 bk val,er = @ 7/19/16 2:50 PM; Parabolic @ 7/19/16 2:50 PM; Ar39 bk val,er = @ 7/19/16 2:50 PM; Average background @ 7/19/16 2:50 PM; Ar38 bk val,er = @ 7/19/16 2:50 PM; Average background @ 7/19/16 2:50 PM; Ar37 bk val,er = @ 7/19/16 2:50 PM; Average background @ 7/19/16 2:50 PM; Ar36 bk val,er = @ 7/19/16 2:50 PM; Parabolic @ 7/19/16 2:50 PM; Detector intercalibration obtained from Weighte…	C12:284	LPPLLPAAAAAA	1	Pychron Script	1	Fusions CO2	4	4	0	4	0	30	30	131			0
	26	4	3.28636	0.0681373	-0.0249	0.130798	7.48788	100.385	23.6125	0.268959	0.0016219								65077-26	RC16-HM-129	37	2016-07-15	16.5333	3551445000		Sanidine	12	Crow01148		129.138.12.160	7.875	Ar40 bk val,er = @ 7/19/16 2:50 PM; Parabolic @ 7/19/16 2:50 PM; Ar39 bk val,er = @ 7/19/16 2:50 PM; Average background @ 7/19/16 2:50 PM; Ar38 bk val,er = @ 7/19/16 2:50 PM; Average background @ 7/19/16 2:50 PM; Ar37 bk val,er = @ 7/19/16 2:50 PM; Average background @ 7/19/16 2:50 PM; Ar36 bk val,er = @ 7/19/16 2:50 PM; Parabolic @ 7/19/16 2:50 PM; Detector intercalibration obtained from Weighte…	C12:284	LPPLLPAAAAAA	1	Pychron Script	1	Fusions CO2	4	4	0	4	0	30	30	126			0
	45	3.5	3.28673	0.0279434	-0.0384	0.228388	18.2585	100.411	23.6206	0.101348	0.0012923								65077-45	RC16-HM-129	37	2016-08-07	10.05	3553409000		Sanidine	12	Crow01148		129.138.12.160	7.875	Ar41 bk val,er = @ 8/15/16 4:40 PM; Average background @ 8/15/16 4:40 PM; Ar40 bk val,er = @ 8/15/16 4:40 PM; Linear @ 8/15/16 4:40 PM; Ar39 bk val,er = @ 8/15/16 4:40 PM; Average background @ 8/15/16 4:40 PM; Ar38 bk val,er = @ 8/15/16 4:40 PM; Average background @ 8/15/16 4:40 PM; Ar37 bk val,er = @ 8/15/16 4:40 PM; Average background @ 8/15/16 4:40 PM; Ar36 bk val,er = @ 8/15/16 4:40 PM; Linea…	C:12 DS	LPPLLPAAAAAA	1	Pychron Script	1	Fusions CO2	3.5	3.5	0	3.5	0	30	30	140			0
	25	4	3.31577	0.0236938	0.0319	0.14283	21.5332	99.7687	23.6769	0.241965	0.0016219								65077-25	RC16-HM-129	37	2016-07-15	16.3167	3551444000		Sanidine	12	Crow01148		129.138.12.160	7.875	Ar40 bk val,er = @ 7/19/16 2:50 PM; Parabolic @ 7/19/16 2:50 PM; Ar39 bk val,er = @ 7/19/16 2:50 PM; Average background @ 7/19/16 2:50 PM; Ar38 bk val,er = @ 7/19/16 2:50 PM; Average background @ 7/19/16 2:50 PM; Ar37 bk val,er = @ 7/19/16 2:50 PM; Average background @ 7/19/16 2:50 PM; Ar36 bk val,er = @ 7/19/16 2:50 PM; Parabolic @ 7/19/16 2:50 PM; Detector intercalibration obtained from Weighte…	C12:284	LPPLLPAAAAAA	1	Pychron Script	1	Fusions CO2	4	4	0	4	0	30	30	127			0
	10	4	3.52562	0.0198759	0.6894	0.298636	25.6695	94.2522	23.7858	0.124874	0.0016219								65077-10	RC16-HM-129	37	2016-07-15	12.7333	3551431000		Sanidine	12	Crow01148		129.138.12.160	7.875	Ar40 bk val,er = @ 7/19/16 2:50 PM; Parabolic @ 7/19/16 2:50 PM; Ar39 bk val,er = @ 7/19/16 2:50 PM; Average background @ 7/19/16 2:50 PM; Ar38 bk val,er = @ 7/19/16 2:50 PM; Average background @ 7/19/16 2:50 PM; Ar37 bk val,er = @ 7/19/16 2:50 PM; Average background @ 7/19/16 2:50 PM; Ar36 bk val,er = @ 7/19/16 2:50 PM; Parabolic @ 7/19/16 2:50 PM; Detector intercalibration obtained from Weighte…	C12:284	LPPLLPAAAAAA	1	Pychron Script	1	Fusions CO2	4	4	0	4	0	30	30	111			0
	55	3.5	3.34737	0.0270455	0.0516	0.114862	18.8647	99.6052	23.8628	0.203835	0.0012923								65077-55	RC16-HM-129	37	2016-08-07	13	3553420000		Sanidine	12	Crow01148		129.138.12.160	7.875	Ar41 bk val,er = @ 8/15/16 4:40 PM; Average background @ 8/15/16 4:40 PM; Ar40 bk val,er = @ 8/15/16 4:40 PM; Linear @ 8/15/16 4:40 PM; Ar39 bk val,er = @ 8/15/16 4:40 PM; Average background @ 8/15/16 4:40 PM; Ar38 bk val,er = @ 8/15/16 4:40 PM; Average background @ 8/15/16 4:40 PM; Ar37 bk val,er = @ 8/15/16 4:40 PM; Average background @ 8/15/16 4:40 PM; Ar36 bk val,er = @ 8/15/16 4:40 PM; Linea…	C:12 DS	LPPLLPAAAAAA	1	Pychron Script	1	Fusions CO2	3.5	3.5	0	3.5	0	30	30	150			0
	09	4	3.36988	0.0231708	0.0981	0.144972	22.0193	99.1907	23.9231	0.239399	0.0016219								65077-09	RC16-HM-129	37	2016-07-15	12.5167	3551431000		Sanidine	12	Crow01148		129.138.12.160	7.875	Ar40 bk val,er = @ 7/19/16 2:50 PM; Parabolic @ 7/19/16 2:50 PM; Ar39 bk val,er = @ 7/19/16 2:50 PM; Average background @ 7/19/16 2:50 PM; Ar38 bk val,er = @ 7/19/16 2:50 PM; Average background @ 7/19/16 2:50 PM; Ar37 bk val,er = @ 7/19/16 2:50 PM; Average background @ 7/19/16 2:50 PM; Ar36 bk val,er = @ 7/19/16 2:50 PM; Parabolic @ 7/19/16 2:50 PM; Detector intercalibration obtained from Weighte…	C12:284	LPPLLPAAAAAA	1	Pychron Script	1	Fusions CO2	4	4	0	4	0	30	30	110			0
	49	3.5	3.36743	0.0342731	0.0875	0.200442	14.8864	99.308	23.9341	0.120019	0.0012923								65077-49	RC16-HM-129	37	2016-08-07	11.7333	3553415000		Sanidine	12	Crow01148		129.138.12.160	7.875	Ar41 bk val,er = @ 8/15/16 4:40 PM; Average background @ 8/15/16 4:40 PM; Ar40 bk val,er = @ 8/15/16 4:40 PM; Linear @ 8/15/16 4:40 PM; Ar39 bk val,er = @ 8/15/16 4:40 PM; Average background @ 8/15/16 4:40 PM; Ar38 bk val,er = @ 8/15/16 4:40 PM; Average background @ 8/15/16 4:40 PM; Ar37 bk val,er = @ 8/15/16 4:40 PM; Average background @ 8/15/16 4:40 PM; Ar36 bk val,er = @ 8/15/16 4:40 PM; Linea…	C:12 DS	LPPLLPAAAAAA	1	Pychron Script	1	Fusions CO2	3.5	3.5	0	3.5	0	30	30	144			0
	20	4	3.3374	0.0471978	-0.0269	0.156875	10.8099	100.347	23.9683	0.218171	0.0016219								65077-20	RC16-HM-129	37	2016-07-15	15.0333	3551440000		Sanidine	12	Crow01148		129.138.12.160	7.875	Ar40 bk val,er = @ 7/19/16 2:50 PM; Parabolic @ 7/19/16 2:50 PM; Ar39 bk val,er = @ 7/19/16 2:50 PM; Average background @ 7/19/16 2:50 PM; Ar38 bk val,er = @ 7/19/16 2:50 PM; Average background @ 7/19/16 2:50 PM; Ar37 bk val,er = @ 7/19/16 2:50 PM; Average background @ 7/19/16 2:50 PM; Ar36 bk val,er = @ 7/19/16 2:50 PM; Parabolic @ 7/19/16 2:50 PM; Detector intercalibration obtained from Weighte…	C12:284	LPPLLPAAAAAA	1	Pychron Script	1	Fusions CO2	4	4	0	4	0	30	30	121			0
	29	4	3.35741	0.0340419	0.0116	0.154634	14.9875	99.9753	24.0225	0.225641	0.0016219								65077-29	RC16-HM-129	37	2016-07-15	17.1833	3551447000		Sanidine	12	Crow01148		129.138.12.160	7.875	Ar40 bk val,er = @ 7/19/16 2:50 PM; Parabolic @ 7/19/16 2:50 PM; Ar39 bk val,er = @ 7/19/16 2:50 PM; Average background @ 7/19/16 2:50 PM; Ar38 bk val,er = @ 7/19/16 2:50 PM; Average background @ 7/19/16 2:50 PM; Ar37 bk val,er = @ 7/19/16 2:50 PM; Average background @ 7/19/16 2:50 PM; Ar36 bk val,er = @ 7/19/16 2:50 PM; Parabolic @ 7/19/16 2:50 PM; Detector intercalibration obtained from Weighte…	C12:284	LPPLLPAAAAAA	1	Pychron Script	1	Fusions CO2	4	4	0	4	0	30	30	130			0
	42	3.5	3.3977	0.0638918	0.1495	0.0781892	7.98544	98.8421	24.0362	0.306493	0.0012923								65077-42	RC16-HM-129	37	2016-08-07	9.4	3553407000		Sanidine	12	Crow01148		129.138.12.160	7.875	Ar41 bk val,er = @ 8/15/16 4:40 PM; Average background @ 8/15/16 4:40 PM; Ar40 bk val,er = @ 8/15/16 4:40 PM; Linear @ 8/15/16 4:40 PM; Ar39 bk val,er = @ 8/15/16 4:40 PM; Average background @ 8/15/16 4:40 PM; Ar38 bk val,er = @ 8/15/16 4:40 PM; Average background @ 8/15/16 4:40 PM; Ar37 bk val,er = @ 8/15/16 4:40 PM; Average background @ 8/15/16 4:40 PM; Ar36 bk val,er = @ 8/15/16 4:40 PM; Linea…	C:12 DS	LPPLLPAAAAAA	1	Pychron Script	1	Fusions CO2	3.5	3.5	0	3.5	0	30	30	137			0
	02	3	3.40649	0.0411363	0.1646	0.273312	12.4028	98.6622	24.0542	0.12821	0.0016219								65077-02	RC16-HM-129	37	2016-07-15	10.7167	3551424000		Sanidine	12	Crow01148		129.138.12.160	7.875	Ar40 bk val,er = @ 7/19/16 2:50 PM; Parabolic @ 7/19/16 2:50 PM; Ar39 bk val,er = @ 7/19/16 2:50 PM; Average background @ 7/19/16 2:50 PM; Ar38 bk val,er = @ 7/19/16 2:50 PM; Average background @ 7/19/16 2:50 PM; Ar37 bk val,er = @ 7/19/16 2:50 PM; Average background @ 7/19/16 2:50 PM; Ar36 bk val,er = @ 7/19/16 2:50 PM; Parabolic @ 7/19/16 2:50 PM; Detector intercalibration obtained from Weighte…	C12:284	LPPLLPAAAAAA	1	Pychron Script	1	Fusions CO2	3	3	0	3	0	30	30	103			0
	37	3.5	3.35687	0.0342893	-0.0103	0.236056	14.8794	100.171	24.0652	0.0970617	0.0012923								65077-37	RC16-HM-129	37	2016-08-07	8.08333	3553402000		Sanidine	12	Crow01148		129.138.12.160	7.875	Ar41 bk val,er = @ 8/15/16 4:40 PM; Average background @ 8/15/16 4:40 PM; Ar40 bk val,er = @ 8/15/16 4:40 PM; Linear @ 8/15/16 4:40 PM; Ar39 bk val,er = @ 8/15/16 4:40 PM; Average background @ 8/15/16 4:40 PM; Ar38 bk val,er = @ 8/15/16 4:40 PM; Average background @ 8/15/16 4:40 PM; Ar37 bk val,er = @ 8/15/16 4:40 PM; Average background @ 8/15/16 4:40 PM; Ar36 bk val,er = @ 8/15/16 4:40 PM; Linea…	C:12 DS	LPPLLPAAAAAA	1	Pychron Script	1	Fusions CO2	3.5	3.5	0	3.5	0	30	30	132			0
	06	3	3.46426	0.0427777	0.3401	0.140915	11.9269	97.1883	24.0973	0.250652	0.0016219								65077-06	RC16-HM-129	37	2016-07-15	11.5833	3551427000		Sanidine	12	Crow01148		129.138.12.160	7.875	Ar40 bk val,er = @ 7/19/16 2:50 PM; Parabolic @ 7/19/16 2:50 PM; Ar39 bk val,er = @ 7/19/16 2:50 PM; Average background @ 7/19/16 2:50 PM; Ar38 bk val,er = @ 7/19/16 2:50 PM; Average background @ 7/19/16 2:50 PM; Ar37 bk val,er = @ 7/19/16 2:50 PM; Average background @ 7/19/16 2:50 PM; Ar36 bk val,er = @ 7/19/16 2:50 PM; Parabolic @ 7/19/16 2:50 PM; Detector intercalibration obtained from Weighte…	C12:284	LPPLLPAAAAAA	1	Pychron Script	1	Fusions CO2	3	3	0	3	0	30	30	107			0
	48	3.5	3.38563	0.0336919	0.0713	0.11791	15.1432	99.4528	24.0978	0.19817	0.0012923								65077-48	RC16-HM-129	37	2016-08-07	11.5167	3553414000		Sanidine	12	Crow01148		129.138.12.160	7.875	Ar41 bk val,er = @ 8/15/16 4:40 PM; Average background @ 8/15/16 4:40 PM; Ar40 bk val,er = @ 8/15/16 4:40 PM; Linear @ 8/15/16 4:40 PM; Ar39 bk val,er = @ 8/15/16 4:40 PM; Average background @ 8/15/16 4:40 PM; Ar38 bk val,er = @ 8/15/16 4:40 PM; Average background @ 8/15/16 4:40 PM; Ar37 bk val,er = @ 8/15/16 4:40 PM; Average background @ 8/15/16 4:40 PM; Ar36 bk val,er = @ 8/15/16 4:40 PM; Linea…	C:12 DS	LPPLLPAAAAAA	1	Pychron Script	1	Fusions CO2	3.5	3.5	0	3.5	0	30	30	143			0
	50	3.5	3.46413	0.0413548	0.3267	0.0777329	12.3372	97.2987	24.1237	0.315461	0.0012923								65077-50	RC16-HM-129	37	2016-08-07	12.1833	3553417000		Sanidine	12	Crow01148		129.138.12.160	7.875	Ar41 bk val,er = @ 8/15/16 4:40 PM; Average background @ 8/15/16 4:40 PM; Ar40 bk val,er = @ 8/15/16 4:40 PM; Linear @ 8/15/16 4:40 PM; Ar39 bk val,er = @ 8/15/16 4:40 PM; Average background @ 8/15/16 4:40 PM; Ar38 bk val,er = @ 8/15/16 4:40 PM; Average background @ 8/15/16 4:40 PM; Ar37 bk val,er = @ 8/15/16 4:40 PM; Average background @ 8/15/16 4:40 PM; Ar36 bk val,er = @ 8/15/16 4:40 PM; Linea…	C:12 DS	LPPLLPAAAAAA	1	Pychron Script	1	Fusions CO2	3.5	3.5	0	3.5	0	30	30	145			0
	15	4	3.7431	0.056892	1.2708	0.124921	8.96794	90.0638	24.1322	0.289965	0.0016219								65077-15	RC16-HM-129	37	2016-07-15	13.75	3551435000		Sanidine	12	Crow01148		129.138.12.160	7.875	Ar40 bk val,er = @ 7/19/16 2:50 PM; Parabolic @ 7/19/16 2:50 PM; Ar39 bk val,er = @ 7/19/16 2:50 PM; Average background @ 7/19/16 2:50 PM; Ar38 bk val,er = @ 7/19/16 2:50 PM; Average background @ 7/19/16 2:50 PM; Ar37 bk val,er = @ 7/19/16 2:50 PM; Average background @ 7/19/16 2:50 PM; Ar36 bk val,er = @ 7/19/16 2:50 PM; Parabolic @ 7/19/16 2:50 PM; Detector intercalibration obtained from Weighte…	C12:284	LPPLLPAAAAAA	1	Pychron Script	1	Fusions CO2	4	4	0	4	0	30	30	116			0
	56	3.5	3.39269	0.0571538	0.0683	0.0908119	8.92686	99.5327	24.1674	0.259761	0.0012923								65077-56	RC16-HM-129	37	2016-08-07	13.2167	3553420000		Sanidine	12	Crow01148		129.138.12.160	7.875	Ar41 bk val,er = @ 8/15/16 4:40 PM; Average background @ 8/15/16 4:40 PM; Ar40 bk val,er = @ 8/15/16 4:40 PM; Linear @ 8/15/16 4:40 PM; Ar39 bk val,er = @ 8/15/16 4:40 PM; Average background @ 8/15/16 4:40 PM; Ar38 bk val,er = @ 8/15/16 4:40 PM; Average background @ 8/15/16 4:40 PM; Ar37 bk val,er = @ 8/15/16 4:40 PM; Average background @ 8/15/16 4:40 PM; Ar36 bk val,er = @ 8/15/16 4:40 PM; Linea…	C:12 DS	LPPLLPAAAAAA	1	Pychron Script	1	Fusions CO2	3.5	3.5	0	3.5	0	30	30	151			0
	31	4	3.40671	0.0579615	0.1109	0.0580352	8.80246	99.1666	24.1782	0.596376	0.0016219								65077-31	RC16-HM-129	37	2016-07-15	17.6	3551449000		Sanidine	12	Crow01148		129.138.12.160	7.875	Ar40 bk val,er = @ 7/19/16 2:50 PM; Parabolic @ 7/19/16 2:50 PM; Ar39 bk val,er = @ 7/19/16 2:50 PM; Average background @ 7/19/16 2:50 PM; Ar38 bk val,er = @ 7/19/16 2:50 PM; Average background @ 7/19/16 2:50 PM; Ar37 bk val,er = @ 7/19/16 2:50 PM; Average background @ 7/19/16 2:50 PM; Ar36 bk val,er = @ 7/19/16 2:50 PM; Parabolic @ 7/19/16 2:50 PM; Detector intercalibration obtained from Weighte…	C12:284	LPPLLPAAAAAA	1	Pychron Script	1	Fusions CO2	4	4	0	4	0	30	30	132			0
	62	3.5	3.3867	0.0274442	0.0305	0.169832	18.5906	99.7965	24.188	0.141844	0.0012923								65077-62	RC16-HM-129	37	2016-08-07	14.5	3553425000		Sanidine	12	Crow01148		129.138.12.160	7.875	Ar41 bk val,er = @ 8/15/16 4:40 PM; Average background @ 8/15/16 4:40 PM; Ar40 bk val,er = @ 8/15/16 4:40 PM; Linear @ 8/15/16 4:40 PM; Ar39 bk val,er = @ 8/15/16 4:40 PM; Average background @ 8/15/16 4:40 PM; Ar38 bk val,er = @ 8/15/16 4:40 PM; Average background @ 8/15/16 4:40 PM; Ar37 bk val,er = @ 8/15/16 4:40 PM; Average background @ 8/15/16 4:40 PM; Ar36 bk val,er = @ 8/15/16 4:40 PM; Linea…	C:12 DS	LPPLLPAAAAAA	1	Pychron Script	1	Fusions CO2	3.5	3.5	0	3.5	0	30	30	157			0
	23	4	3.41182	0.0553223	0.0962	0.107399	9.22239	99.2903	24.2443	0.323317	0.0016219								65077-23	RC16-HM-129	37	2016-07-15	15.8833	3551443000		Sanidine	12	Crow01148		129.138.12.160	7.875	Ar40 bk val,er = @ 7/19/16 2:50 PM; Parabolic @ 7/19/16 2:50 PM; Ar39 bk val,er = @ 7/19/16 2:50 PM; Average background @ 7/19/16 2:50 PM; Ar38 bk val,er = @ 7/19/16 2:50 PM; Average background @ 7/19/16 2:50 PM; Ar37 bk val,er = @ 7/19/16 2:50 PM; Average background @ 7/19/16 2:50 PM; Ar36 bk val,er = @ 7/19/16 2:50 PM; Parabolic @ 7/19/16 2:50 PM; Detector intercalibration obtained from Weighte…	C12:284	LPPLLPAAAAAA	1	Pychron Script	1	Fusions CO2	4	4	0	4	0	30	30	124			0
	16	4	3.39252	0.06067	0.0138	0.112859	8.40949	100.018	24.2833	0.309204	0.0016219								65077-16	RC16-HM-129	37	2016-07-15	14.1667	3551437000		Sanidine	12	Crow01148		129.138.12.160	7.875	Ar40 bk val,er = @ 7/19/16 2:50 PM; Parabolic @ 7/19/16 2:50 PM; Ar39 bk val,er = @ 7/19/16 2:50 PM; Average background @ 7/19/16 2:50 PM; Ar38 bk val,er = @ 7/19/16 2:50 PM; Average background @ 7/19/16 2:50 PM; Ar37 bk val,er = @ 7/19/16 2:50 PM; Average background @ 7/19/16 2:50 PM; Ar36 bk val,er = @ 7/19/16 2:50 PM; Parabolic @ 7/19/16 2:50 PM; Detector intercalibration obtained from Weighte…	C12:284	LPPLLPAAAAAA	1	Pychron Script	1	Fusions CO2	4	4	0	4	0	30	30	117			0
	14	4	3.40849	0.0405954	0.0559	0.134903	12.568	99.6054	24.2968	0.259061	0.0016219								65077-14	RC16-HM-129	37	2016-07-15	13.5333	3551434000		Sanidine	12	Crow01148		129.138.12.160	7.875	Ar40 bk val,er = @ 7/19/16 2:50 PM; Parabolic @ 7/19/16 2:50 PM; Ar39 bk val,er = @ 7/19/16 2:50 PM; Average background @ 7/19/16 2:50 PM; Ar38 bk val,er = @ 7/19/16 2:50 PM; Average background @ 7/19/16 2:50 PM; Ar37 bk val,er = @ 7/19/16 2:50 PM; Average background @ 7/19/16 2:50 PM; Ar36 bk val,er = @ 7/19/16 2:50 PM; Parabolic @ 7/19/16 2:50 PM; Detector intercalibration obtained from Weighte…	C12:284	LPPLLPAAAAAA	1	Pychron Script	1	Fusions CO2	4	4	0	4	0	30	30	115			0
	24	4	3.45114	0.0019035	0.088	0.121585	268.035	99.2492	24.5114	0.287409	0.0016219								65077-24	RC16-HM-129	37	2016-07-15	16.1	3551444000		Sanidine	12	Crow01148		129.138.12.160	7.875	Ar40 bk val,er = @ 7/19/16 2:50 PM; Parabolic @ 7/19/16 2:50 PM; Ar39 bk val,er = @ 7/19/16 2:50 PM; Average background @ 7/19/16 2:50 PM; Ar38 bk val,er = @ 7/19/16 2:50 PM; Average background @ 7/19/16 2:50 PM; Ar37 bk val,er = @ 7/19/16 2:50 PM; Average background @ 7/19/16 2:50 PM; Ar36 bk val,er = @ 7/19/16 2:50 PM; Parabolic @ 7/19/16 2:50 PM; Detector intercalibration obtained from Weighte…	C12:284	LPPLLPAAAAAA	1	Pychron Script	1	Fusions CO2	4	4	0	4	0	30	30	125			0
	22	4	3.58158	0.0084738	0.498	0.186579	60.2096	95.9007	24.5813	0.191158	0.0016219								65077-22	RC16-HM-129	37	2016-07-15	15.6833	3551442000		Sanidine	12	Crow01148		129.138.12.160	7.875	Ar40 bk val,er = @ 7/19/16 2:50 PM; Parabolic @ 7/19/16 2:50 PM; Ar39 bk val,er = @ 7/19/16 2:50 PM; Average background @ 7/19/16 2:50 PM; Ar38 bk val,er = @ 7/19/16 2:50 PM; Average background @ 7/19/16 2:50 PM; Ar37 bk val,er = @ 7/19/16 2:50 PM; Average background @ 7/19/16 2:50 PM; Ar36 bk val,er = @ 7/19/16 2:50 PM; Parabolic @ 7/19/16 2:50 PM; Detector intercalibration obtained from Weighte…	C12:284	LPPLLPAAAAAA	1	Pychron Script	1	Fusions CO2	4	4	0	4	0	30	30	123			0
	39	3.5	3.45978	0.0027904	0.0515	0.153617	182.843	99.5636	24.6499	0.14958	0.0012923								65077-39	RC16-HM-129	37	2016-08-07	8.75	3553404000		Sanidine	12	Crow01148		129.138.12.160	7.875	Ar41 bk val,er = @ 8/15/16 4:40 PM; Average background @ 8/15/16 4:40 PM; Ar40 bk val,er = @ 8/15/16 4:40 PM; Linear @ 8/15/16 4:40 PM; Ar39 bk val,er = @ 8/15/16 4:40 PM; Average background @ 8/15/16 4:40 PM; Ar38 bk val,er = @ 8/15/16 4:40 PM; Average background @ 8/15/16 4:40 PM; Ar37 bk val,er = @ 8/15/16 4:40 PM; Average background @ 8/15/16 4:40 PM; Ar36 bk val,er = @ 8/15/16 4:40 PM; Linea…	C:12 DS	LPPLLPAAAAAA	1	Pychron Script	1	Fusions CO2	3.5	3.5	0	3.5	0	30	30	134			0
	21	4	3.52387	0.0117032	0.2643	0.112229	43.5953	97.8051	24.6641	0.309178	0.0016219								65077-21	RC16-HM-129	37	2016-07-15	15.4667	3551441000		Sanidine	12	Crow01148		129.138.12.160	7.875	Ar40 bk val,er = @ 7/19/16 2:50 PM; Parabolic @ 7/19/16 2:50 PM; Ar39 bk val,er = @ 7/19/16 2:50 PM; Average background @ 7/19/16 2:50 PM; Ar38 bk val,er = @ 7/19/16 2:50 PM; Average background @ 7/19/16 2:50 PM; Ar37 bk val,er = @ 7/19/16 2:50 PM; Average background @ 7/19/16 2:50 PM; Ar36 bk val,er = @ 7/19/16 2:50 PM; Parabolic @ 7/19/16 2:50 PM; Detector intercalibration obtained from Weighte…	C12:284	LPPLLPAAAAAA	1	Pychron Script	1	Fusions CO2	4	4	0	4	0	30	30	122			0
	59	3.5	3.53664	0.0338753	0.3094	0.0556377	15.0612	97.4818	24.6722	0.437517	0.0012923								65077-59	RC16-HM-129	37	2016-08-07	13.7167	3553422000		Sanidine	12	Crow01148		129.138.12.160	7.875	Ar41 bk val,er = @ 8/15/16 4:40 PM; Average background @ 8/15/16 4:40 PM; Ar40 bk val,er = @ 8/15/16 4:40 PM; Linear @ 8/15/16 4:40 PM; Ar39 bk val,er = @ 8/15/16 4:40 PM; Average background @ 8/15/16 4:40 PM; Ar38 bk val,er = @ 8/15/16 4:40 PM; Average background @ 8/15/16 4:40 PM; Ar37 bk val,er = @ 8/15/16 4:40 PM; Average background @ 8/15/16 4:40 PM; Ar36 bk val,er = @ 8/15/16 4:40 PM; Linea…	C:12 DS	LPPLLPAAAAAA	1	Pychron Script	1	Fusions CO2	3.5	3.5	0	3.5	0	30	30	154			0
	33	4	3.63946	0.0093435	0.6473	0.0691296	54.6052	94.7523	24.6796	0.507926	0.0016219								65077-33	RC16-HM-129	37	2016-07-15	19.5167	3551456000		Sanidine	12	Crow01148		129.138.12.160	7.875	Ar40 bk val,er = @ 7/19/16 2:50 PM; Parabolic @ 7/19/16 2:50 PM; Ar39 bk val,er = @ 7/19/16 2:50 PM; Average background @ 7/19/16 2:50 PM; Ar38 bk val,er = @ 7/19/16 2:50 PM; Average background @ 7/19/16 2:50 PM; Ar37 bk val,er = @ 7/19/16 2:50 PM; Average background @ 7/19/16 2:50 PM; Ar36 bk val,er = @ 7/19/16 2:50 PM; Parabolic @ 7/19/16 2:50 PM; Detector intercalibration obtained from Weighte…	C12:284	LPPLLPAAAAAA	1	Pychron Script	1	Fusions CO2	4	4	0	4	0	30	30	134			0
	54	3.5	3.47504	0.01893	0.0668	0.110229	26.9521	99.472	24.7358	0.218512	0.0012923								65077-54	RC16-HM-129	37	2016-08-07	12.7833	3553419000		Sanidine	12	Crow01148		129.138.12.160	7.875	Ar41 bk val,er = @ 8/15/16 4:40 PM; Average background @ 8/15/16 4:40 PM; Ar40 bk val,er = @ 8/15/16 4:40 PM; Linear @ 8/15/16 4:40 PM; Ar39 bk val,er = @ 8/15/16 4:40 PM; Average background @ 8/15/16 4:40 PM; Ar38 bk val,er = @ 8/15/16 4:40 PM; Average background @ 8/15/16 4:40 PM; Ar37 bk val,er = @ 8/15/16 4:40 PM; Average background @ 8/15/16 4:40 PM; Ar36 bk val,er = @ 8/15/16 4:40 PM; Linea…	C:12 DS	LPPLLPAAAAAA	1	Pychron Script	1	Fusions CO2	3.5	3.5	0	3.5	0	30	30	149			0
	64	3.5	3.54218	0.0122791	0.2874	0.10682	41.5506	97.6251	24.7464	0.226816	0.0012923								65077-64	RC16-HM-129	37	2016-08-07	14.8	3553426000		Sanidine	12	Crow01148		129.138.12.160	7.875	Ar41 bk val,er = @ 8/15/16 4:40 PM; Average background @ 8/15/16 4:40 PM; Ar40 bk val,er = @ 8/15/16 4:40 PM; Linear @ 8/15/16 4:40 PM; Ar39 bk val,er = @ 8/15/16 4:40 PM; Average background @ 8/15/16 4:40 PM; Ar38 bk val,er = @ 8/15/16 4:40 PM; Average background @ 8/15/16 4:40 PM; Ar37 bk val,er = @ 8/15/16 4:40 PM; Average background @ 8/15/16 4:40 PM; Ar36 bk val,er = @ 8/15/16 4:40 PM; Linea…	C:12 DS	LPPLLPAAAAAA	1	Pychron Script	1	Fusions CO2	3.5	3.5	0	3.5	0	30	30	159			0
	11	4	3.46287	0.0066642	0.0148	0.338428	76.5589	99.8881	24.7517	0.103219	0.0016219								65077-11	RC16-HM-129	37	2016-07-15	13.15	3551433000		Sanidine	12	Crow01148		129.138.12.160	7.875	Ar40 bk val,er = @ 7/19/16 2:50 PM; Parabolic @ 7/19/16 2:50 PM; Ar39 bk val,er = @ 7/19/16 2:50 PM; Average background @ 7/19/16 2:50 PM; Ar38 bk val,er = @ 7/19/16 2:50 PM; Average background @ 7/19/16 2:50 PM; Ar37 bk val,er = @ 7/19/16 2:50 PM; Average background @ 7/19/16 2:50 PM; Ar36 bk val,er = @ 7/19/16 2:50 PM; Parabolic @ 7/19/16 2:50 PM; Detector intercalibration obtained from Weighte…	C12:284	LPPLLPAAAAAA	1	Pychron Script	1	Fusions CO2	4	4	0	4	0	30	30	112			0
	43	3.5	3.47077	0.0140458	0.025	0.109592	36.3243	99.8199	24.7912	0.211619	0.0012923								65077-43	RC16-HM-129	37	2016-08-07	9.61667	3553407000		Sanidine	12	Crow01148		129.138.12.160	7.875	Ar41 bk val,er = @ 8/15/16 4:40 PM; Average background @ 8/15/16 4:40 PM; Ar40 bk val,er = @ 8/15/16 4:40 PM; Linear @ 8/15/16 4:40 PM; Ar39 bk val,er = @ 8/15/16 4:40 PM; Average background @ 8/15/16 4:40 PM; Ar38 bk val,er = @ 8/15/16 4:40 PM; Average background @ 8/15/16 4:40 PM; Ar37 bk val,er = @ 8/15/16 4:40 PM; Average background @ 8/15/16 4:40 PM; Ar36 bk val,er = @ 8/15/16 4:40 PM; Linea…	C:12 DS	LPPLLPAAAAAA	1	Pychron Script	1	Fusions CO2	3.5	3.5	0	3.5	0	30	30	138			0
	03	3	3.56383	0.032638	0.2925	0.0663071	15.6322	97.6403	24.9011	0.531706	0.0016219								65077-03	RC16-HM-129	37	2016-07-15	10.9167	3551425000		Sanidine	12	Crow01148		129.138.12.160	7.875	Ar40 bk val,er = @ 7/19/16 2:50 PM; Parabolic @ 7/19/16 2:50 PM; Ar39 bk val,er = @ 7/19/16 2:50 PM; Average background @ 7/19/16 2:50 PM; Ar38 bk val,er = @ 7/19/16 2:50 PM; Average background @ 7/19/16 2:50 PM; Ar37 bk val,er = @ 7/19/16 2:50 PM; Average background @ 7/19/16 2:50 PM; Ar36 bk val,er = @ 7/19/16 2:50 PM; Parabolic @ 7/19/16 2:50 PM; Detector intercalibration obtained from Weighte…	C12:284	LPPLLPAAAAAA	1	Pychron Script	1	Fusions CO2	3	3	0	3	0	30	30	104			0
	04	3	3.50315	0.0101281	0.0263	0.168388	50.3751	99.7989	25.0162	0.208871	0.0016219								65077-04	RC16-HM-129	37	2016-07-15	11.1333	3551426000		Sanidine	12	Crow01148		129.138.12.160	7.875	Ar40 bk val,er = @ 7/19/16 2:50 PM; Parabolic @ 7/19/16 2:50 PM; Ar39 bk val,er = @ 7/19/16 2:50 PM; Average background @ 7/19/16 2:50 PM; Ar38 bk val,er = @ 7/19/16 2:50 PM; Average background @ 7/19/16 2:50 PM; Ar37 bk val,er = @ 7/19/16 2:50 PM; Average background @ 7/19/16 2:50 PM; Ar36 bk val,er = @ 7/19/16 2:50 PM; Parabolic @ 7/19/16 2:50 PM; Detector intercalibration obtained from Weighte…	C12:284	LPPLLPAAAAAA	1	Pychron Script	1	Fusions CO2	3	3	0	3	0	30	30	105			0
	47	3.5	3.47824	0.0153465	-0.0712	0.127072	33.2456	100.64	25.0471	0.188854	0.0012923								65077-47	RC16-HM-129	37	2016-08-07	11.3	3553413000		Sanidine	12	Crow01148		129.138.12.160	7.875	Ar41 bk val,er = @ 8/15/16 4:40 PM; Average background @ 8/15/16 4:40 PM; Ar40 bk val,er = @ 8/15/16 4:40 PM; Linear @ 8/15/16 4:40 PM; Ar39 bk val,er = @ 8/15/16 4:40 PM; Average background @ 8/15/16 4:40 PM; Ar38 bk val,er = @ 8/15/16 4:40 PM; Average background @ 8/15/16 4:40 PM; Ar37 bk val,er = @ 8/15/16 4:40 PM; Average background @ 8/15/16 4:40 PM; Ar36 bk val,er = @ 8/15/16 4:40 PM; Linea…	C:12 DS	LPPLLPAAAAAA	1	Pychron Script	1	Fusions CO2	3.5	3.5	0	3.5	0	30	30	142			0
	46	3.5	3.52888	0.0145204	-0.0591	0.0583067	35.137	100.529	25.3821	0.411477	0.0012923								65077-46	RC16-HM-129	37	2016-08-07	11.0833	3553413000		Sanidine	12	Crow01148		129.138.12.160	7.875	Ar41 bk val,er = @ 8/15/16 4:40 PM; Average background @ 8/15/16 4:40 PM; Ar40 bk val,er = @ 8/15/16 4:40 PM; Linear @ 8/15/16 4:40 PM; Ar39 bk val,er = @ 8/15/16 4:40 PM; Average background @ 8/15/16 4:40 PM; Ar38 bk val,er = @ 8/15/16 4:40 PM; Average background @ 8/15/16 4:40 PM; Ar37 bk val,er = @ 8/15/16 4:40 PM; Average background @ 8/15/16 4:40 PM; Ar36 bk val,er = @ 8/15/16 4:40 PM; Linea…	C:12 DS	LPPLLPAAAAAA	1	Pychron Script	1	Fusions CO2	3.5	3.5	0	3.5	0	30	30	141			0
	38	3.5	3.58125	0.0599324	0.0416	0.131661	8.51299	99.7865	25.5689	0.179631	0.0012923								65077-38	RC16-HM-129	37	2016-08-07	8.53333	3553404000		Sanidine	12	Crow01148		129.138.12.160	7.875	Ar41 bk val,er = @ 8/15/16 4:40 PM; Average background @ 8/15/16 4:40 PM; Ar40 bk val,er = @ 8/15/16 4:40 PM; Linear @ 8/15/16 4:40 PM; Ar39 bk val,er = @ 8/15/16 4:40 PM; Average background @ 8/15/16 4:40 PM; Ar38 bk val,er = @ 8/15/16 4:40 PM; Average background @ 8/15/16 4:40 PM; Ar37 bk val,er = @ 8/15/16 4:40 PM; Average background @ 8/15/16 4:40 PM; Ar36 bk val,er = @ 8/15/16 4:40 PM; Linea…	C:12 DS	LPPLLPAAAAAA	1	Pychron Script	1	Fusions CO2	3.5	3.5	0	3.5	0	30	30	133			0
	41	3.5	4.97644	0.0001851	0.1407	0.0644146	2756.37	99.1637	35.2343	0.395817	0.0012923								65077-41	RC16-HM-129	37	2016-08-07	9.18333	3553406000		Sanidine	12	Crow01148		129.138.12.160	7.875	Ar41 bk val,er = @ 8/15/16 4:40 PM; Average background @ 8/15/16 4:40 PM; Ar40 bk val,er = @ 8/15/16 4:40 PM; Linear @ 8/15/16 4:40 PM; Ar39 bk val,er = @ 8/15/16 4:40 PM; Average background @ 8/15/16 4:40 PM; Ar38 bk val,er = @ 8/15/16 4:40 PM; Average background @ 8/15/16 4:40 PM; Ar37 bk val,er = @ 8/15/16 4:40 PM; Average background @ 8/15/16 4:40 PM; Ar36 bk val,er = @ 8/15/16 4:40 PM; Linea…	C:12 DS	LPPLLPAAAAAA	1	Pychron Script	1	Fusions CO2	3.5	3.5	0	3.5	0	30	30	136			0
	18	4	5.10856	0.0138101	0.5825	0.30675	36.9443	96.6465	35.2532	0.124094	0.0016219								65077-18	RC16-HM-129	37	2016-07-15	14.6	3551438000		Sanidine	12	Crow01148		129.138.12.160	7.875	Ar40 bk val,er = @ 7/19/16 2:50 PM; Parabolic @ 7/19/16 2:50 PM; Ar39 bk val,er = @ 7/19/16 2:50 PM; Average background @ 7/19/16 2:50 PM; Ar38 bk val,er = @ 7/19/16 2:50 PM; Average background @ 7/19/16 2:50 PM; Ar37 bk val,er = @ 7/19/16 2:50 PM; Average background @ 7/19/16 2:50 PM; Ar36 bk val,er = @ 7/19/16 2:50 PM; Parabolic @ 7/19/16 2:50 PM; Detector intercalibration obtained from Weighte…	C12:284	LPPLLPAAAAAA	1	Pychron Script	1	Fusions CO2	4	4	0	4	0	30	30	119			0
	52	3.5	5.16711	0.030738	0.1597	0.117599	16.5985	99.1307	36.5617	0.226684	0.0012923								65077-52	RC16-HM-129	37	2016-08-07	12.4833	3553418000		Sanidine	12	Crow01148		129.138.12.160	7.875	Ar41 bk val,er = @ 8/15/16 4:40 PM; Average background @ 8/15/16 4:40 PM; Ar40 bk val,er = @ 8/15/16 4:40 PM; Linear @ 8/15/16 4:40 PM; Ar39 bk val,er = @ 8/15/16 4:40 PM; Average background @ 8/15/16 4:40 PM; Ar38 bk val,er = @ 8/15/16 4:40 PM; Average background @ 8/15/16 4:40 PM; Ar37 bk val,er = @ 8/15/16 4:40 PM; Average background @ 8/15/16 4:40 PM; Ar36 bk val,er = @ 8/15/16 4:40 PM; Linea…	C:12 DS	LPPLLPAAAAAA	1	Pychron Script	1	Fusions CO2	3.5	3.5	0	3.5	0	30	30	147			0
	61	3.5	5.37335	0.0065284	-0.0386	0.071197	78.1515	100.222	38.4214	0.376622	0.0012923								65077-61	RC16-HM-129	37	2016-08-07	14.0333	3553423000		Sanidine	12	Crow01148		129.138.12.160	7.875	Ar41 bk val,er = @ 8/15/16 4:40 PM; Average background @ 8/15/16 4:40 PM; Ar40 bk val,er = @ 8/15/16 4:40 PM; Linear @ 8/15/16 4:40 PM; Ar39 bk val,er = @ 8/15/16 4:40 PM; Average background @ 8/15/16 4:40 PM; Ar38 bk val,er = @ 8/15/16 4:40 PM; Average background @ 8/15/16 4:40 PM; Ar37 bk val,er = @ 8/15/16 4:40 PM; Average background @ 8/15/16 4:40 PM; Ar36 bk val,er = @ 8/15/16 4:40 PM; Linea…	C:12 DS	LPPLLPAAAAAA	1	Pychron Script	1	Fusions CO2	3.5	3.5	0	3.5	0	30	30	156			0
	67	3.5	5.54153	0.0354308	0.3848	0.0737708	14.4	97.9958	38.7429	0.377928	0.0012923								65077-67	RC16-HM-129	37	2016-08-07	16	3553430000		Sanidine	12	Crow01148		129.138.12.160	7.875	Ar41 bk val,er = @ 8/15/16 4:40 PM; Average background @ 8/15/16 4:40 PM; Ar40 bk val,er = @ 8/15/16 4:40 PM; Linear @ 8/15/16 4:40 PM; Ar39 bk val,er = @ 8/15/16 4:40 PM; Average background @ 8/15/16 4:40 PM; Ar38 bk val,er = @ 8/15/16 4:40 PM; Average background @ 8/15/16 4:40 PM; Ar37 bk val,er = @ 8/15/16 4:40 PM; Average background @ 8/15/16 4:40 PM; Ar36 bk val,er = @ 8/15/16 4:40 PM; Linea…	C:12 DS	LPPLLPAAAAAA	1	Pychron Script	1	Fusions CO2	3.5	3.5	0	3.5	0	30	30	162			0
	05	3	6.52615	0.0013434	0.4432	0.261015	379.786	97.9925	45.5484	0.155029	0.0016219								65077-05	RC16-HM-129	37	2016-07-15	11.35	3551427000		Sanidine	12	Crow01148		129.138.12.160	7.875	Ar40 bk val,er = @ 7/19/16 2:50 PM; Parabolic @ 7/19/16 2:50 PM; Ar39 bk val,er = @ 7/19/16 2:50 PM; Average background @ 7/19/16 2:50 PM; Ar38 bk val,er = @ 7/19/16 2:50 PM; Average background @ 7/19/16 2:50 PM; Ar37 bk val,er = @ 7/19/16 2:50 PM; Average background @ 7/19/16 2:50 PM; Ar36 bk val,er = @ 7/19/16 2:50 PM; Parabolic @ 7/19/16 2:50 PM; Detector intercalibration obtained from Weighte…	C12:284	LPPLLPAAAAAA	1	Pychron Script	1	Fusions CO2	3	3	0	3	0	30	30	106			0
	27	4	8.26456	0.015772	0.00986176	0.194931	32.3487	99.9793	58.6545	0.215558	0.0016219								65077-27	RC16-HM-129	37	2016-07-15	16.75	3551446000		Sanidine	12	Crow01148		129.138.12.160	7.875	Ar40 bk val,er = @ 7/19/16 2:50 PM; Parabolic @ 7/19/16 2:50 PM; Ar39 bk val,er = @ 7/19/16 2:50 PM; Average background @ 7/19/16 2:50 PM; Ar38 bk val,er = @ 7/19/16 2:50 PM; Average background @ 7/19/16 2:50 PM; Ar37 bk val,er = @ 7/19/16 2:50 PM; Average background @ 7/19/16 2:50 PM; Ar36 bk val,er = @ 7/19/16 2:50 PM; Parabolic @ 7/19/16 2:50 PM; Detector intercalibration obtained from Weighte…	C12:284	LPPLLPAAAAAA	1	Pychron Script	1	Fusions CO2	4	4	0	4	0	30	30	128			0
	51	3.5	35.9655	-0.113751	1.9917	0.021907	-	98.3395	238.984	25.7412	0.0012923								65077-51	RC16-HM-129	37	2016-08-07	12.2667	3553417000		Sanidine	12	Crow01148		129.138.12.160	7.875	Ar41 bk val,er = @ 8/15/16 4:40 PM; Average background @ 8/15/16 4:40 PM; Ar40 bk val,er = @ 8/15/16 4:40 PM; Linear @ 8/15/16 4:40 PM; Ar39 bk val,er = @ 8/15/16 4:40 PM; Average background @ 8/15/16 4:40 PM; Ar38 bk val,er = @ 8/15/16 4:40 PM; Average background @ 8/15/16 4:40 PM; Ar37 bk val,er = @ 8/15/16 4:40 PM; Average background @ 8/15/16 4:40 PM; Ar36 bk val,er = @ 8/15/16 4:40 PM; Linea…	C:12 DS	LPPLLPAAAAAA	1	Pychron Script	1	Fusions CO2	3.5	3.5	0	3.5	0	30	30	146			0
	66	3.5	203.494	0.0101868	3.1558	0.149724	50.0848	99.5421	1074.87	15.0041	0.0012923								65077-66	RC16-HM-129	37	2016-08-07	15.7833	3553430000		Sanidine	12	Crow01148		129.138.12.160	7.875	Ar41 bk val,er = @ 8/15/16 4:40 PM; Average background @ 8/15/16 4:40 PM; Ar40 bk val,er = @ 8/15/16 4:40 PM; Linear @ 8/15/16 4:40 PM; Ar39 bk val,er = @ 8/15/16 4:40 PM; Average background @ 8/15/16 4:40 PM; Ar38 bk val,er = @ 8/15/16 4:40 PM; Average background @ 8/15/16 4:40 PM; Ar37 bk val,er = @ 8/15/16 4:40 PM; Average background @ 8/15/16 4:40 PM; Ar36 bk val,er = @ 8/15/16 4:40 PM; Linea…	C:12 DS	LPPLLPAAAAAA	1	Pychron Script	1	Fusions CO2	3.5	3.5	0	3.5	0	30	30	161			0
				n=59
	RC16-HM-129, Sanidine, J=0.0039035±0.02%, IC=1.003843±0.0007737, NM-300B, Lab#=66650, Argus VI
	44	2.1	3.4214	0.0617405	1.3709	0.06078	8.26368	88.2917	21.4196	1.09574	0.0007737								66650-44	RC16-HM-129	37	2018-12-11	16.7833	3627392000		Sanidine	2	Crow01148		129.138.12.160	7.875	Ar40 = L @ 12/12/18 11:15 AM; Ar39 = L @ 12/12/18 11:15 AM; Ar38 = L @ 12/12/18 11:15 AM; Ar37 = L @ 12/12/18 11:15 AM; Ar36 = L @ 12/12/18 11:15 AM; Ar41 bk val,er = @ 12/12/18 11:25 AM; Average background @ 12/12/18 11:25 AM; Ar39 bk val,er = @ 12/12/18 11:25 AM; Average background @ 12/12/18 11:25 AM; Ar38 bk val,er = @ 12/12/18 11:25 AM; Average background @ 12/12/18 11:25 AM; Ar37 bk val,er …	B:2 DS	ALLLLLAAAAAA	1	Pychron Script	1	Fusions CO2	2.1	0	0	0	0	30	30	160			0
	24	2.1	3.61064	0.144829	1.8111	0.0630006	3.52281	85.4917	21.8881	1.05952	0.0007737								66650-24	RC16-HM-129	37	2018-12-11	14.35	3627383000		Sanidine	2	Crow01148		129.138.12.160	7.875	Ar40 = L @ 12/12/18 11:15 AM; Ar39 = L @ 12/12/18 11:15 AM; Ar38 = L @ 12/12/18 11:15 AM; Ar37 = L @ 12/12/18 11:15 AM; Ar36 = L @ 12/12/18 11:15 AM; Ar41 bk val,er = @ 12/12/18 11:25 AM; Average background @ 12/12/18 11:25 AM; Ar39 bk val,er = @ 12/12/18 11:25 AM; Average background @ 12/12/18 11:25 AM; Ar38 bk val,er = @ 12/12/18 11:25 AM; Average background @ 12/12/18 11:25 AM; Ar37 bk val,er …	B:2 DS	ALLLLLAAAAAA	1	Pychron Script	1	Fusions CO2	2.1	0	0	0	0	30	30	140			0
	37	2.1	3.46391	0.071272	1.2688	0.0829481	7.15855	89.3339	21.9392	0.807571	0.0007737								66650-37	RC16-HM-129	37	2018-12-11	16.0667	3627389000		Sanidine	2	Crow01148		129.138.12.160	7.875	Ar40 = L @ 12/12/18 11:15 AM; Ar39 = L @ 12/12/18 11:15 AM; Ar38 = L @ 12/12/18 11:15 AM; Ar37 = L @ 12/12/18 11:15 AM; Ar36 = L @ 12/12/18 11:15 AM; Ar41 bk val,er = @ 12/12/18 11:25 AM; Average background @ 12/12/18 11:25 AM; Ar39 bk val,er = @ 12/12/18 11:25 AM; Average background @ 12/12/18 11:25 AM; Ar38 bk val,er = @ 12/12/18 11:25 AM; Average background @ 12/12/18 11:25 AM; Ar37 bk val,er …	B:2 DS	ALLLLLAAAAAA	1	Pychron Script	1	Fusions CO2	2.1	0	0	0	0	30	30	153			0
	14	2.1	3.54588	0.0614097	1.5371	0.0886389	8.3082	87.3085	21.95	0.751048	0.0007737								66650-14	RC16-HM-129	37	2018-12-11	13.2167	3627379000		Sanidine	2	Crow01148		129.138.12.160	7.875	Ar40 = L @ 12/12/18 11:15 AM; Ar39 = L @ 12/12/18 11:15 AM; Ar38 = L @ 12/12/18 11:15 AM; Ar37 = L @ 12/12/18 11:15 AM; Ar36 = L @ 12/12/18 11:15 AM; Ar41 bk val,er = @ 12/12/18 11:25 AM; Average background @ 12/12/18 11:25 AM; Ar39 bk val,er = @ 12/12/18 11:25 AM; Average background @ 12/12/18 11:25 AM; Ar38 bk val,er = @ 12/12/18 11:25 AM; Average background @ 12/12/18 11:25 AM; Ar37 bk val,er …	B:2 DS	ALLLLLAAAAAA	1	Pychron Script	1	Fusions CO2	2.1	0	0	0	0	30	30	130			0
	35	2.1	3.48125	0.0602317	1.3092	0.0624579	8.47069	89.0219	21.9719	1.11134	0.0007737								66650-35	RC16-HM-129	37	2018-12-11	15.8833	3627388000		Sanidine	2	Crow01148		129.138.12.160	7.875	Ar40 = L @ 12/12/18 11:15 AM; Ar39 = L @ 12/12/18 11:15 AM; Ar38 = L @ 12/12/18 11:15 AM; Ar37 = L @ 12/12/18 11:15 AM; Ar36 = L @ 12/12/18 11:15 AM; Ar41 bk val,er = @ 12/12/18 11:25 AM; Average background @ 12/12/18 11:25 AM; Ar39 bk val,er = @ 12/12/18 11:25 AM; Average background @ 12/12/18 11:25 AM; Ar38 bk val,er = @ 12/12/18 11:25 AM; Average background @ 12/12/18 11:25 AM; Ar37 bk val,er …	B:2 DS	ALLLLLAAAAAA	1	Pychron Script	1	Fusions CO2	2.1	0	0	0	0	30	30	151			0
	18	2.1	3.43017	0.0108955	1.1002	0.115477	46.827	90.5309	22.0148	0.581806	0.0007737								66650-18	RC16-HM-129	37	2018-12-11	13.6333	3627380000		Sanidine	2	Crow01148		129.138.12.160	7.875	Ar40 = L @ 12/12/18 11:15 AM; Ar39 = L @ 12/12/18 11:15 AM; Ar38 = L @ 12/12/18 11:15 AM; Ar37 = L @ 12/12/18 11:15 AM; Ar36 = L @ 12/12/18 11:15 AM; Ar41 bk val,er = @ 12/12/18 11:25 AM; Average background @ 12/12/18 11:25 AM; Ar39 bk val,er = @ 12/12/18 11:25 AM; Average background @ 12/12/18 11:25 AM; Ar38 bk val,er = @ 12/12/18 11:25 AM; Average background @ 12/12/18 11:25 AM; Ar37 bk val,er …	B:2 DS	ALLLLLAAAAAA	1	Pychron Script	1	Fusions CO2	2.1	0	0	0	0	30	30	134			0
	04	2.1	3.41556	0.0420724	0.9643	0.129793	12.1268	91.7492	22.2152	0.512961	0.0007737								66650-04	RC16-HM-129	37	2018-12-11	11.4833	3627373000		Sanidine	2	Crow01148		129.138.12.160	7.875	Ar40 = L @ 12/12/18 11:15 AM; Ar39 = L @ 12/12/18 11:15 AM; Ar38 = L @ 12/12/18 11:15 AM; Ar37 = L @ 12/12/18 11:15 AM; Ar36 = L @ 12/12/18 11:15 AM; Ar41 bk val,er = @ 12/12/18 11:25 AM; Average background @ 12/12/18 11:25 AM; Ar39 bk val,er = @ 12/12/18 11:25 AM; Average background @ 12/12/18 11:25 AM; Ar38 bk val,er = @ 12/12/18 11:25 AM; Average background @ 12/12/18 11:25 AM; Ar37 bk val,er …	B:2 DS	ALLLLLAAAAAA	1	Pychron Script	1	Fusions CO2	2.1	0	0	0	0	30	30	120			0
	25	2.1	3.45677	0.0319389	1.0786	0.106274	15.9744	90.8761	22.2692	0.641574	0.0007737								66650-25	RC16-HM-129	37	2018-12-11	14.5833	3627384000		Sanidine	2	Crow01148		129.138.12.160	7.875	Ar40 = L @ 12/12/18 11:15 AM; Ar39 = L @ 12/12/18 11:15 AM; Ar38 = L @ 12/12/18 11:15 AM; Ar37 = L @ 12/12/18 11:15 AM; Ar36 = L @ 12/12/18 11:15 AM; Ar41 bk val,er = @ 12/12/18 11:25 AM; Average background @ 12/12/18 11:25 AM; Ar39 bk val,er = @ 12/12/18 11:25 AM; Average background @ 12/12/18 11:25 AM; Ar38 bk val,er = @ 12/12/18 11:25 AM; Average background @ 12/12/18 11:25 AM; Ar37 bk val,er …	B:2 DS	ALLLLLAAAAAA	1	Pychron Script	1	Fusions CO2	2.1	0	0	0	0	30	30	141			0
	16	2.1	3.39209	0.0197333	0.8372	0.143285	25.855	92.744	22.3005	0.470708	0.0007737								66650-16	RC16-HM-129	37	2018-12-11	13.4333	3627380000		Sanidine	2	Crow01148		129.138.12.160	7.875	Ar40 = L @ 12/12/18 11:15 AM; Ar39 = L @ 12/12/18 11:15 AM; Ar38 = L @ 12/12/18 11:15 AM; Ar37 = L @ 12/12/18 11:15 AM; Ar36 = L @ 12/12/18 11:15 AM; Ar41 bk val,er = @ 12/12/18 11:25 AM; Average background @ 12/12/18 11:25 AM; Ar39 bk val,er = @ 12/12/18 11:25 AM; Average background @ 12/12/18 11:25 AM; Ar38 bk val,er = @ 12/12/18 11:25 AM; Average background @ 12/12/18 11:25 AM; Ar37 bk val,er …	B:2 DS	ALLLLLAAAAAA	1	Pychron Script	1	Fusions CO2	2.1	0	0	0	0	30	30	132			0
	19	2.1	3.43996	0.0722504	1.0094	0.0891803	7.06161	91.4861	22.3099	0.762685	0.0007737								66650-19	RC16-HM-129	37	2018-12-11	13.7333	3627381000		Sanidine	2	Crow01148		129.138.12.160	7.875	Ar40 = L @ 12/12/18 11:15 AM; Ar39 = L @ 12/12/18 11:15 AM; Ar38 = L @ 12/12/18 11:15 AM; Ar37 = L @ 12/12/18 11:15 AM; Ar36 = L @ 12/12/18 11:15 AM; Ar41 bk val,er = @ 12/12/18 11:25 AM; Average background @ 12/12/18 11:25 AM; Ar39 bk val,er = @ 12/12/18 11:25 AM; Average background @ 12/12/18 11:25 AM; Ar38 bk val,er = @ 12/12/18 11:25 AM; Average background @ 12/12/18 11:25 AM; Ar37 bk val,er …	B:2 DS	ALLLLLAAAAAA	1	Pychron Script	1	Fusions CO2	2.1	0	0	0	0	30	30	135			0
	45	2.1	3.42841	0.111469	0.8929	0.090381	4.57708	92.5619	22.4958	0.746702	0.0007737								66650-45	RC16-HM-129	37	2018-12-11	17.0333	3627393000		Sanidine	2	Crow01148		129.138.12.160	7.875	Ar40 = L @ 12/12/18 11:15 AM; Ar39 = L @ 12/12/18 11:15 AM; Ar38 = L @ 12/12/18 11:15 AM; Ar37 = L @ 12/12/18 11:15 AM; Ar36 = L @ 12/12/18 11:15 AM; Ar41 bk val,er = @ 12/12/18 11:25 AM; Average background @ 12/12/18 11:25 AM; Ar39 bk val,er = @ 12/12/18 11:25 AM; Average background @ 12/12/18 11:25 AM; Ar38 bk val,er = @ 12/12/18 11:25 AM; Average background @ 12/12/18 11:25 AM; Ar37 bk val,er …	B:2 DS	ALLLLLAAAAAA	1	Pychron Script	1	Fusions CO2	2.1	0	0	0	0	30	30	161			0
	29	2.1	3.47375	0.0634913	1.0302	0.090019	8.03581	91.3747	22.5007	0.731738	0.0007737								66650-29	RC16-HM-129	37	2018-12-11	14.9833	3627385000		Sanidine	2	Crow01148		129.138.12.160	7.875	Ar40 = L @ 12/12/18 11:15 AM; Ar39 = L @ 12/12/18 11:15 AM; Ar38 = L @ 12/12/18 11:15 AM; Ar37 = L @ 12/12/18 11:15 AM; Ar36 = L @ 12/12/18 11:15 AM; Ar41 bk val,er = @ 12/12/18 11:25 AM; Average background @ 12/12/18 11:25 AM; Ar39 bk val,er = @ 12/12/18 11:25 AM; Average background @ 12/12/18 11:25 AM; Ar38 bk val,er = @ 12/12/18 11:25 AM; Average background @ 12/12/18 11:25 AM; Ar37 bk val,er …	B:2 DS	ALLLLLAAAAAA	1	Pychron Script	1	Fusions CO2	2.1	0	0	0	0	30	30	145			0
	30	2.1	3.41238	0.048381	0.7863	0.170274	10.5455	93.325	22.5735	0.39463	0.0007737								66650-30	RC16-HM-129	37	2018-12-11	15.0833	3627386000		Sanidine	2	Crow01148		129.138.12.160	7.875	Ar40 = L @ 12/12/18 11:15 AM; Ar39 = L @ 12/12/18 11:15 AM; Ar38 = L @ 12/12/18 11:15 AM; Ar37 = L @ 12/12/18 11:15 AM; Ar36 = L @ 12/12/18 11:15 AM; Ar41 bk val,er = @ 12/12/18 11:25 AM; Average background @ 12/12/18 11:25 AM; Ar39 bk val,er = @ 12/12/18 11:25 AM; Average background @ 12/12/18 11:25 AM; Ar38 bk val,er = @ 12/12/18 11:25 AM; Average background @ 12/12/18 11:25 AM; Ar37 bk val,er …	B:2 DS	ALLLLLAAAAAA	1	Pychron Script	1	Fusions CO2	2.1	0	0	0	0	30	30	146			0
	20	2.1	3.46658	0.0380419	0.9266	0.120377	13.4116	92.179	22.6505	0.560653	0.0007737								66650-20	RC16-HM-129	37	2018-12-11	13.95	3627381000		Sanidine	2	Crow01148		129.138.12.160	7.875	Ar40 = L @ 12/12/18 11:15 AM; Ar39 = L @ 12/12/18 11:15 AM; Ar38 = L @ 12/12/18 11:15 AM; Ar37 = L @ 12/12/18 11:15 AM; Ar36 = L @ 12/12/18 11:15 AM; Ar41 bk val,er = @ 12/12/18 11:25 AM; Average background @ 12/12/18 11:25 AM; Ar39 bk val,er = @ 12/12/18 11:25 AM; Average background @ 12/12/18 11:25 AM; Ar38 bk val,er = @ 12/12/18 11:25 AM; Average background @ 12/12/18 11:25 AM; Ar37 bk val,er …	B:2 DS	ALLLLLAAAAAA	1	Pychron Script	1	Fusions CO2	2.1	0	0	0	0	30	30	136			0
	50	2.1	3.55683	-0.0092595	1.1918	0.102984	-	90.065	22.7072	0.644878	0.0007737								66650-50	RC16-HM-129	37	2018-12-11	17.75	3627395000		Sanidine	2	Crow01148		129.138.12.160	7.875	Ar40 = L @ 12/12/18 11:15 AM; Ar39 = L @ 12/12/18 11:15 AM; Ar38 = L @ 12/12/18 11:15 AM; Ar37 = L @ 12/12/18 11:15 AM; Ar36 = L @ 12/12/18 11:15 AM; Ar41 bk val,er = @ 12/12/18 11:25 AM; Average background @ 12/12/18 11:25 AM; Ar39 bk val,er = @ 12/12/18 11:25 AM; Average background @ 12/12/18 11:25 AM; Ar38 bk val,er = @ 12/12/18 11:25 AM; Average background @ 12/12/18 11:25 AM; Ar37 bk val,er …	B:2 DS	ALLLLLAAAAAA	1	Pychron Script	1	Fusions CO2	2.1	0	0	0	0	30	30	166			0
	07	2.1	3.40877	0.0228139	0.6508	0.134448	22.3637	94.4119	22.8103	0.496133	0.0007737								66650-07	RC16-HM-129	37	2018-12-11	12.5167	3627376000		Sanidine	2	Crow01148		129.138.12.160	7.875	Ar40 = L @ 12/12/18 11:15 AM; Ar39 = L @ 12/12/18 11:15 AM; Ar38 = L @ 12/12/18 11:15 AM; Ar37 = L @ 12/12/18 11:15 AM; Ar36 = L @ 12/12/18 11:15 AM; Ar41 bk val,er = @ 12/12/18 11:25 AM; Average background @ 12/12/18 11:25 AM; Ar39 bk val,er = @ 12/12/18 11:25 AM; Average background @ 12/12/18 11:25 AM; Ar38 bk val,er = @ 12/12/18 11:25 AM; Average background @ 12/12/18 11:25 AM; Ar37 bk val,er …	B:2 DS	ALLLLLAAAAAA	1	Pychron Script	1	Fusions CO2	2.1	0	0	0	0	30	30	123			0
	22	2.1	3.44001	0.0497608	0.7022	0.18926	10.2531	94.0919	22.9414	0.357657	0.0007737								66650-22	RC16-HM-129	37	2018-12-11	14.15	3627382000		Sanidine	2	Crow01148		129.138.12.160	7.875	Ar40 = L @ 12/12/18 11:15 AM; Ar39 = L @ 12/12/18 11:15 AM; Ar38 = L @ 12/12/18 11:15 AM; Ar37 = L @ 12/12/18 11:15 AM; Ar36 = L @ 12/12/18 11:15 AM; Ar41 bk val,er = @ 12/12/18 11:25 AM; Average background @ 12/12/18 11:25 AM; Ar39 bk val,er = @ 12/12/18 11:25 AM; Average background @ 12/12/18 11:25 AM; Ar38 bk val,er = @ 12/12/18 11:25 AM; Average background @ 12/12/18 11:25 AM; Ar37 bk val,er …	B:2 DS	ALLLLLAAAAAA	1	Pychron Script	1	Fusions CO2	2.1	0	0	0	0	30	30	138			0
	28	2.1	3.45307	0.0440709	0.6917	0.110953	11.5769	94.1758	23.0484	0.604155	0.0007737								66650-28	RC16-HM-129	37	2018-12-11	14.8833	3627385000		Sanidine	2	Crow01148		129.138.12.160	7.875	Ar40 = L @ 12/12/18 11:15 AM; Ar39 = L @ 12/12/18 11:15 AM; Ar38 = L @ 12/12/18 11:15 AM; Ar37 = L @ 12/12/18 11:15 AM; Ar36 = L @ 12/12/18 11:15 AM; Ar41 bk val,er = @ 12/12/18 11:25 AM; Average background @ 12/12/18 11:25 AM; Ar39 bk val,er = @ 12/12/18 11:25 AM; Average background @ 12/12/18 11:25 AM; Ar38 bk val,er = @ 12/12/18 11:25 AM; Average background @ 12/12/18 11:25 AM; Ar37 bk val,er …	B:2 DS	ALLLLLAAAAAA	1	Pychron Script	1	Fusions CO2	2.1	0	0	0	0	30	30	144			0
	41	2.1	3.39061	0.0403943	0.4543	0.210174	12.6306	96.148	23.1042	0.317654	0.0007737								66650-41	RC16-HM-129	37	2018-12-11	16.5	3627391000		Sanidine	2	Crow01148		129.138.12.160	7.875	Ar40 = L @ 12/12/18 11:15 AM; Ar39 = L @ 12/12/18 11:15 AM; Ar38 = L @ 12/12/18 11:15 AM; Ar37 = L @ 12/12/18 11:15 AM; Ar36 = L @ 12/12/18 11:15 AM; Ar41 bk val,er = @ 12/12/18 11:25 AM; Average background @ 12/12/18 11:25 AM; Ar39 bk val,er = @ 12/12/18 11:25 AM; Average background @ 12/12/18 11:25 AM; Ar38 bk val,er = @ 12/12/18 11:25 AM; Average background @ 12/12/18 11:25 AM; Ar37 bk val,er …	B:2 DS	ALLLLLAAAAAA	1	Pychron Script	1	Fusions CO2	2.1	0	0	0	0	30	30	157			0
	10	2.1	3.5646	0.0838307	1.0485	0.0989481	6.08612	91.5019	23.1188	0.672423	0.0007737								66650-10	RC16-HM-129	37	2018-12-11	12.8167	3627377000		Sanidine	2	Crow01148		129.138.12.160	7.875	Ar40 = L @ 12/12/18 11:15 AM; Ar39 = L @ 12/12/18 11:15 AM; Ar38 = L @ 12/12/18 11:15 AM; Ar37 = L @ 12/12/18 11:15 AM; Ar36 = L @ 12/12/18 11:15 AM; Ar41 bk val,er = @ 12/12/18 11:25 AM; Average background @ 12/12/18 11:25 AM; Ar39 bk val,er = @ 12/12/18 11:25 AM; Average background @ 12/12/18 11:25 AM; Ar38 bk val,er = @ 12/12/18 11:25 AM; Average background @ 12/12/18 11:25 AM; Ar37 bk val,er …	B:2 DS	ALLLLLAAAAAA	1	Pychron Script	1	Fusions CO2	2.1	0	0	0	0	30	30	126			0
	23	2.1	3.60506	0.0468501	1.1715	0.185674	10.8901	90.4938	23.1234	0.364903	0.0007737								66650-23	RC16-HM-129	37	2018-12-11	14.25	3627383000		Sanidine	2	Crow01148		129.138.12.160	7.875	Ar40 = L @ 12/12/18 11:15 AM; Ar39 = L @ 12/12/18 11:15 AM; Ar38 = L @ 12/12/18 11:15 AM; Ar37 = L @ 12/12/18 11:15 AM; Ar36 = L @ 12/12/18 11:15 AM; Ar41 bk val,er = @ 12/12/18 11:25 AM; Average background @ 12/12/18 11:25 AM; Ar39 bk val,er = @ 12/12/18 11:25 AM; Average background @ 12/12/18 11:25 AM; Ar38 bk val,er = @ 12/12/18 11:25 AM; Average background @ 12/12/18 11:25 AM; Ar37 bk val,er …	B:2 DS	ALLLLLAAAAAA	1	Pychron Script	1	Fusions CO2	2.1	0	0	0	0	30	30	139			0
	08	2.1	3.46685	0.0159791	0.6539	0.189097	31.9295	94.4554	23.2078	0.359055	0.0007737								66650-08	RC16-HM-129	37	2018-12-11	12.6167	3627377000		Sanidine	2	Crow01148		129.138.12.160	7.875	Ar40 = L @ 12/12/18 11:15 AM; Ar39 = L @ 12/12/18 11:15 AM; Ar38 = L @ 12/12/18 11:15 AM; Ar37 = L @ 12/12/18 11:15 AM; Ar36 = L @ 12/12/18 11:15 AM; Ar41 bk val,er = @ 12/12/18 11:25 AM; Average background @ 12/12/18 11:25 AM; Ar39 bk val,er = @ 12/12/18 11:25 AM; Average background @ 12/12/18 11:25 AM; Ar38 bk val,er = @ 12/12/18 11:25 AM; Average background @ 12/12/18 11:25 AM; Ar37 bk val,er …	B:2 DS	ALLLLLAAAAAA	1	Pychron Script	1	Fusions CO2	2.1	0	0	0	0	30	30	124			0
	46	2.1	3.45672	0.0938429	0.6148	0.128212	5.43679	94.9613	23.2646	0.519049	0.0007737								66650-46	RC16-HM-129	37	2018-12-11	17.1333	3627393000		Sanidine	2	Crow01148		129.138.12.160	7.875	Ar40 = L @ 12/12/18 11:15 AM; Ar39 = L @ 12/12/18 11:15 AM; Ar38 = L @ 12/12/18 11:15 AM; Ar37 = L @ 12/12/18 11:15 AM; Ar36 = L @ 12/12/18 11:15 AM; Ar41 bk val,er = @ 12/12/18 11:25 AM; Average background @ 12/12/18 11:25 AM; Ar39 bk val,er = @ 12/12/18 11:25 AM; Average background @ 12/12/18 11:25 AM; Ar38 bk val,er = @ 12/12/18 11:25 AM; Average background @ 12/12/18 11:25 AM; Ar37 bk val,er …	B:2 DS	ALLLLLAAAAAA	1	Pychron Script	1	Fusions CO2	2.1	0	0	0	0	30	30	162			0
	42	2.1	3.61661	0.0404962	1.1215	0.148659	12.5988	90.9157	23.3046	0.460109	0.0007737								66650-42	RC16-HM-129	37	2018-12-11	16.6	3627391000		Sanidine	2	Crow01148		129.138.12.160	7.875	Ar40 = L @ 12/12/18 11:15 AM; Ar39 = L @ 12/12/18 11:15 AM; Ar38 = L @ 12/12/18 11:15 AM; Ar37 = L @ 12/12/18 11:15 AM; Ar36 = L @ 12/12/18 11:15 AM; Ar41 bk val,er = @ 12/12/18 11:25 AM; Average background @ 12/12/18 11:25 AM; Ar39 bk val,er = @ 12/12/18 11:25 AM; Average background @ 12/12/18 11:25 AM; Ar38 bk val,er = @ 12/12/18 11:25 AM; Average background @ 12/12/18 11:25 AM; Ar37 bk val,er …	B:2 DS	ALLLLLAAAAAA	1	Pychron Script	1	Fusions CO2	2.1	0	0	0	0	30	30	158			0
	49	2.1	3.41535	0.0283346	0.4055	0.193337	18.0064	96.5533	23.3693	0.343876	0.0007737								66650-49	RC16-HM-129	37	2018-12-11	17.5167	3627394000		Sanidine	2	Crow01148		129.138.12.160	7.875	Ar40 = L @ 12/12/18 11:15 AM; Ar39 = L @ 12/12/18 11:15 AM; Ar38 = L @ 12/12/18 11:15 AM; Ar37 = L @ 12/12/18 11:15 AM; Ar36 = L @ 12/12/18 11:15 AM; Ar41 bk val,er = @ 12/12/18 11:25 AM; Average background @ 12/12/18 11:25 AM; Ar39 bk val,er = @ 12/12/18 11:25 AM; Average background @ 12/12/18 11:25 AM; Ar38 bk val,er = @ 12/12/18 11:25 AM; Average background @ 12/12/18 11:25 AM; Ar37 bk val,er …	B:2 DS	ALLLLLAAAAAA	1	Pychron Script	1	Fusions CO2	2.1	0	0	0	0	30	30	165			0
	11	2.1	3.59371	0.0882387	1.0184	0.150403	5.78209	91.8194	23.3872	0.443735	0.0007737								66650-11	RC16-HM-129	37	2018-12-11	12.9167	3627378000		Sanidine	2	Crow01148		129.138.12.160	7.875	Ar40 = L @ 12/12/18 11:15 AM; Ar39 = L @ 12/12/18 11:15 AM; Ar38 = L @ 12/12/18 11:15 AM; Ar37 = L @ 12/12/18 11:15 AM; Ar36 = L @ 12/12/18 11:15 AM; Ar41 bk val,er = @ 12/12/18 11:25 AM; Average background @ 12/12/18 11:25 AM; Ar39 bk val,er = @ 12/12/18 11:25 AM; Average background @ 12/12/18 11:25 AM; Ar38 bk val,er = @ 12/12/18 11:25 AM; Average background @ 12/12/18 11:25 AM; Ar37 bk val,er …	B:2 DS	ALLLLLAAAAAA	1	Pychron Script	1	Fusions CO2	2.1	0	0	0	0	30	30	127			0
	52	2.1	3.77574	0.0326564	1.5857	0.259744	15.6234	87.6417	23.4545	0.267047	0.0007737								66650-52	RC16-HM-129	37	2018-12-11	17.95	3627396000		Sanidine	2	Crow01148		129.138.12.160	7.875	Ar40 = L @ 12/12/18 11:15 AM; Ar39 = L @ 12/12/18 11:15 AM; Ar38 = L @ 12/12/18 11:15 AM; Ar37 = L @ 12/12/18 11:15 AM; Ar36 = L @ 12/12/18 11:15 AM; Ar41 bk val,er = @ 12/12/18 11:25 AM; Average background @ 12/12/18 11:25 AM; Ar39 bk val,er = @ 12/12/18 11:25 AM; Average background @ 12/12/18 11:25 AM; Ar38 bk val,er = @ 12/12/18 11:25 AM; Average background @ 12/12/18 11:25 AM; Ar37 bk val,er …	B:2 DS	ALLLLLAAAAAA	1	Pychron Script	1	Fusions CO2	2.1	0	0	0	0	30	30	168			0
	13	2.1	3.46004	0.045768	0.5108	0.372948	11.1476	95.7396	23.4758	0.179776	0.0007737								66650-13	RC16-HM-129	37	2018-12-11	13.1167	3627378000		Sanidine	2	Crow01148		129.138.12.160	7.875	Ar40 = L @ 12/12/18 11:15 AM; Ar39 = L @ 12/12/18 11:15 AM; Ar38 = L @ 12/12/18 11:15 AM; Ar37 = L @ 12/12/18 11:15 AM; Ar36 = L @ 12/12/18 11:15 AM; Ar41 bk val,er = @ 12/12/18 11:25 AM; Average background @ 12/12/18 11:25 AM; Ar39 bk val,er = @ 12/12/18 11:25 AM; Average background @ 12/12/18 11:25 AM; Ar38 bk val,er = @ 12/12/18 11:25 AM; Average background @ 12/12/18 11:25 AM; Ar37 bk val,er …	B:2 DS	ALLLLLAAAAAA	1	Pychron Script	1	Fusions CO2	2.1	0	0	0	0	30	30	129			0
	38	2.1	3.5105	0.0290914	0.6654	0.408891	17.538	94.4583	23.4995	0.168011	0.0007737								66650-38	RC16-HM-129	37	2018-12-11	16.1833	3627389000		Sanidine	2	Crow01148		129.138.12.160	7.875	Ar40 = L @ 12/12/18 11:15 AM; Ar39 = L @ 12/12/18 11:15 AM; Ar38 = L @ 12/12/18 11:15 AM; Ar37 = L @ 12/12/18 11:15 AM; Ar36 = L @ 12/12/18 11:15 AM; Ar41 bk val,er = @ 12/12/18 11:25 AM; Average background @ 12/12/18 11:25 AM; Ar39 bk val,er = @ 12/12/18 11:25 AM; Average background @ 12/12/18 11:25 AM; Ar38 bk val,er = @ 12/12/18 11:25 AM; Average background @ 12/12/18 11:25 AM; Ar37 bk val,er …	B:2 DS	ALLLLLAAAAAA	1	Pychron Script	1	Fusions CO2	2.1	0	0	0	0	30	30	154			0
	33	2.1	3.51414	0.0307758	0.6686	0.110556	16.5781	94.4403	23.5194	0.605146	0.0007737								66650-33	RC16-HM-129	37	2018-12-11	15.3833	3627387000		Sanidine	2	Crow01148		129.138.12.160	7.875	Ar40 = L @ 12/12/18 11:15 AM; Ar39 = L @ 12/12/18 11:15 AM; Ar38 = L @ 12/12/18 11:15 AM; Ar37 = L @ 12/12/18 11:15 AM; Ar36 = L @ 12/12/18 11:15 AM; Ar41 bk val,er = @ 12/12/18 11:25 AM; Average background @ 12/12/18 11:25 AM; Ar39 bk val,er = @ 12/12/18 11:25 AM; Average background @ 12/12/18 11:25 AM; Ar38 bk val,er = @ 12/12/18 11:25 AM; Average background @ 12/12/18 11:25 AM; Ar37 bk val,er …	B:2 DS	ALLLLLAAAAAA	1	Pychron Script	1	Fusions CO2	2.1	0	0	0	0	30	30	149			0
	15	2.1	3.53493	0.0568949	0.6945	0.225329	8.96748	94.317	23.6276	0.298447	0.0007737								66650-15	RC16-HM-129	37	2018-12-11	13.3167	3627379000		Sanidine	2	Crow01148		129.138.12.160	7.875	Ar40 = L @ 12/12/18 11:15 AM; Ar39 = L @ 12/12/18 11:15 AM; Ar38 = L @ 12/12/18 11:15 AM; Ar37 = L @ 12/12/18 11:15 AM; Ar36 = L @ 12/12/18 11:15 AM; Ar41 bk val,er = @ 12/12/18 11:25 AM; Average background @ 12/12/18 11:25 AM; Ar39 bk val,er = @ 12/12/18 11:25 AM; Average background @ 12/12/18 11:25 AM; Ar38 bk val,er = @ 12/12/18 11:25 AM; Average background @ 12/12/18 11:25 AM; Ar37 bk val,er …	B:2 DS	ALLLLLAAAAAA	1	Pychron Script	1	Fusions CO2	2.1	0	0	0	0	30	30	131			0
	47	2.1	3.5079	0.0201545	0.5836	0.256752	25.3146	95.1247	23.6467	0.25941	0.0007737								66650-47	RC16-HM-129	37	2018-12-11	17.2333	3627393000		Sanidine	2	Crow01148		129.138.12.160	7.875	Ar40 = L @ 12/12/18 11:15 AM; Ar39 = L @ 12/12/18 11:15 AM; Ar38 = L @ 12/12/18 11:15 AM; Ar37 = L @ 12/12/18 11:15 AM; Ar36 = L @ 12/12/18 11:15 AM; Ar41 bk val,er = @ 12/12/18 11:25 AM; Average background @ 12/12/18 11:25 AM; Ar39 bk val,er = @ 12/12/18 11:25 AM; Average background @ 12/12/18 11:25 AM; Ar38 bk val,er = @ 12/12/18 11:25 AM; Average background @ 12/12/18 11:25 AM; Ar37 bk val,er …	B:2 DS	ALLLLLAAAAAA	1	Pychron Script	1	Fusions CO2	2.1	0	0	0	0	30	30	163			0
	01	2.1	3.47287	0.057992	0.4752	0.447134	8.79783	96.0897	23.6482	0.149503	0.0007737								66650-01	RC16-HM-129	37	2018-12-11	11.1833	3627371000		Sanidine	2	Crow01148		129.138.12.160	7.875	Ar40 = L @ 12/12/18 11:15 AM; Ar39 = L @ 12/12/18 11:15 AM; Ar38 = L @ 12/12/18 11:15 AM; Ar37 = L @ 12/12/18 11:15 AM; Ar36 = L @ 12/12/18 11:15 AM; Ar41 bk val,er = @ 12/12/18 11:25 AM; Average background @ 12/12/18 11:25 AM; Ar39 bk val,er = @ 12/12/18 11:25 AM; Average background @ 12/12/18 11:25 AM; Ar38 bk val,er = @ 12/12/18 11:25 AM; Average background @ 12/12/18 11:25 AM; Ar37 bk val,er …	B:2 DS	ALLLLLAAAAAA	1	Pychron Script	1	Fusions CO2	2.1	0	0	0	0	30	30	117			0
	02	2.1	3.84863	0.0155218	1.731	0.382764	32.8702	86.7196	23.6549	0.181364	0.0007737								66650-02	RC16-HM-129	37	2018-12-11	11.2833	3627372000		Sanidine	2	Crow01148		129.138.12.160	7.875	Ar40 = L @ 12/12/18 11:15 AM; Ar39 = L @ 12/12/18 11:15 AM; Ar38 = L @ 12/12/18 11:15 AM; Ar37 = L @ 12/12/18 11:15 AM; Ar36 = L @ 12/12/18 11:15 AM; Ar41 bk val,er = @ 12/12/18 11:25 AM; Average background @ 12/12/18 11:25 AM; Ar39 bk val,er = @ 12/12/18 11:25 AM; Average background @ 12/12/18 11:25 AM; Ar38 bk val,er = @ 12/12/18 11:25 AM; Average background @ 12/12/18 11:25 AM; Ar37 bk val,er …	B:2 DS	ALLLLLAAAAAA	1	Pychron Script	1	Fusions CO2	2.1	0	0	0	0	30	30	118			0
	09	2.1	3.42236	0.0467928	0.2943	0.286132	10.9035	97.5696	23.6623	0.236755	0.0007737								66650-09	RC16-HM-129	37	2018-12-11	12.7167	3627377000		Sanidine	2	Crow01148		129.138.12.160	7.875	Ar40 = L @ 12/12/18 11:15 AM; Ar39 = L @ 12/12/18 11:15 AM; Ar38 = L @ 12/12/18 11:15 AM; Ar37 = L @ 12/12/18 11:15 AM; Ar36 = L @ 12/12/18 11:15 AM; Ar41 bk val,er = @ 12/12/18 11:25 AM; Average background @ 12/12/18 11:25 AM; Ar39 bk val,er = @ 12/12/18 11:25 AM; Average background @ 12/12/18 11:25 AM; Ar38 bk val,er = @ 12/12/18 11:25 AM; Average background @ 12/12/18 11:25 AM; Ar37 bk val,er …	B:2 DS	ALLLLLAAAAAA	1	Pychron Script	1	Fusions CO2	2.1	0	0	0	0	30	30	125			0
	12	2.1	3.56756	0.0148185	0.7605	0.278787	34.4302	93.7263	23.6956	0.239295	0.0007737								66650-12	RC16-HM-129	37	2018-12-11	13.0167	3627378000		Sanidine	2	Crow01148		129.138.12.160	7.875	Ar40 = L @ 12/12/18 11:15 AM; Ar39 = L @ 12/12/18 11:15 AM; Ar38 = L @ 12/12/18 11:15 AM; Ar37 = L @ 12/12/18 11:15 AM; Ar36 = L @ 12/12/18 11:15 AM; Ar41 bk val,er = @ 12/12/18 11:25 AM; Average background @ 12/12/18 11:25 AM; Ar39 bk val,er = @ 12/12/18 11:25 AM; Average background @ 12/12/18 11:25 AM; Ar38 bk val,er = @ 12/12/18 11:25 AM; Average background @ 12/12/18 11:25 AM; Ar37 bk val,er …	B:2 DS	ALLLLLAAAAAA	1	Pychron Script	1	Fusions CO2	2.1	0	0	0	0	30	30	128			0
	34	2.1	3.50122	0.0356085	0.537	0.141122	14.3282	95.5455	23.7059	0.46867	0.0007737								66650-34	RC16-HM-129	37	2018-12-11	15.4833	3627387000		Sanidine	2	Crow01148		129.138.12.160	7.875	Ar40 = L @ 12/12/18 11:15 AM; Ar39 = L @ 12/12/18 11:15 AM; Ar38 = L @ 12/12/18 11:15 AM; Ar37 = L @ 12/12/18 11:15 AM; Ar36 = L @ 12/12/18 11:15 AM; Ar41 bk val,er = @ 12/12/18 11:25 AM; Average background @ 12/12/18 11:25 AM; Ar39 bk val,er = @ 12/12/18 11:25 AM; Average background @ 12/12/18 11:25 AM; Ar38 bk val,er = @ 12/12/18 11:25 AM; Average background @ 12/12/18 11:25 AM; Ar37 bk val,er …	B:2 DS	ALLLLLAAAAAA	1	Pychron Script	1	Fusions CO2	2.1	0	0	0	0	30	30	150			0
	06	2.1	3.87937	0.0077311	1.7972	0.898923	65.9937	86.3041	23.7293	0.0907975	0.0007737								66650-06	RC16-HM-129	37	2018-12-11	12.4167	3627376000		Sanidine	2	Crow01148		129.138.12.160	7.875	Ar40 = L @ 12/12/18 11:15 AM; Ar39 = L @ 12/12/18 11:15 AM; Ar38 = L @ 12/12/18 11:15 AM; Ar37 = L @ 12/12/18 11:15 AM; Ar36 = L @ 12/12/18 11:15 AM; Ar41 bk val,er = @ 12/12/18 11:25 AM; Average background @ 12/12/18 11:25 AM; Ar39 bk val,er = @ 12/12/18 11:25 AM; Average background @ 12/12/18 11:25 AM; Ar38 bk val,er = @ 12/12/18 11:25 AM; Average background @ 12/12/18 11:25 AM; Ar37 bk val,er …	B:2 DS	ALLLLLAAAAAA	1	Pychron Script	1	Fusions CO2	2.1	0	0	0	0	30	30	122			0
	39	2.1	3.5089	0.0178523	0.4912	0.285564	28.5792	95.8982	23.8444	0.235833	0.0007737								66650-39	RC16-HM-129	37	2018-12-11	16.2833	3627390000		Sanidine	2	Crow01148		129.138.12.160	7.875	Ar40 = L @ 12/12/18 11:15 AM; Ar39 = L @ 12/12/18 11:15 AM; Ar38 = L @ 12/12/18 11:15 AM; Ar37 = L @ 12/12/18 11:15 AM; Ar36 = L @ 12/12/18 11:15 AM; Ar41 bk val,er = @ 12/12/18 11:25 AM; Average background @ 12/12/18 11:25 AM; Ar39 bk val,er = @ 12/12/18 11:25 AM; Average background @ 12/12/18 11:25 AM; Ar38 bk val,er = @ 12/12/18 11:25 AM; Average background @ 12/12/18 11:25 AM; Ar37 bk val,er …	B:2 DS	ALLLLLAAAAAA	1	Pychron Script	1	Fusions CO2	2.1	0	0	0	0	30	30	155			0
	40	2.1	3.55034	0.0084762	0.607	0.35801	60.1925	94.9604	23.8902	0.192193	0.0007737								66650-40	RC16-HM-129	37	2018-12-11	16.4	3627390000		Sanidine	2	Crow01148		129.138.12.160	7.875	Ar40 = L @ 12/12/18 11:15 AM; Ar39 = L @ 12/12/18 11:15 AM; Ar38 = L @ 12/12/18 11:15 AM; Ar37 = L @ 12/12/18 11:15 AM; Ar36 = L @ 12/12/18 11:15 AM; Ar41 bk val,er = @ 12/12/18 11:25 AM; Average background @ 12/12/18 11:25 AM; Ar39 bk val,er = @ 12/12/18 11:25 AM; Average background @ 12/12/18 11:25 AM; Ar38 bk val,er = @ 12/12/18 11:25 AM; Average background @ 12/12/18 11:25 AM; Ar37 bk val,er …	B:2 DS	ALLLLLAAAAAA	1	Pychron Script	1	Fusions CO2	2.1	0	0	0	0	30	30	156			0
	31	2.1	3.52996	0.0315492	0.5419	0.173714	16.1717	95.5324	23.8962	0.387667	0.0007737								66650-31	RC16-HM-129	37	2018-12-11	15.1833	3627386000		Sanidine	2	Crow01148		129.138.12.160	7.875	Ar40 = L @ 12/12/18 11:15 AM; Ar39 = L @ 12/12/18 11:15 AM; Ar38 = L @ 12/12/18 11:15 AM; Ar37 = L @ 12/12/18 11:15 AM; Ar36 = L @ 12/12/18 11:15 AM; Ar41 bk val,er = @ 12/12/18 11:25 AM; Average background @ 12/12/18 11:25 AM; Ar39 bk val,er = @ 12/12/18 11:25 AM; Average background @ 12/12/18 11:25 AM; Ar38 bk val,er = @ 12/12/18 11:25 AM; Average background @ 12/12/18 11:25 AM; Ar37 bk val,er …	B:2 DS	ALLLLLAAAAAA	1	Pychron Script	1	Fusions CO2	2.1	0	0	0	0	30	30	147			0
	17	2.1	3.62962	0.005451	0.7918	0.397679	93.5982	93.5535	24.0616	0.175497	0.0007737								66650-17	RC16-HM-129	37	2018-12-11	13.5333	3627380000		Sanidine	2	Crow01148		129.138.12.160	7.875	Ar40 = L @ 12/12/18 11:15 AM; Ar39 = L @ 12/12/18 11:15 AM; Ar38 = L @ 12/12/18 11:15 AM; Ar37 = L @ 12/12/18 11:15 AM; Ar36 = L @ 12/12/18 11:15 AM; Ar41 bk val,er = @ 12/12/18 11:25 AM; Average background @ 12/12/18 11:25 AM; Ar39 bk val,er = @ 12/12/18 11:25 AM; Average background @ 12/12/18 11:25 AM; Ar38 bk val,er = @ 12/12/18 11:25 AM; Average background @ 12/12/18 11:25 AM; Ar37 bk val,er …	B:2 DS	ALLLLLAAAAAA	1	Pychron Script	1	Fusions CO2	2.1	0	0	0	0	30	30	133			0
	32	2.1	3.4955	0.0135082	0.2146	0.306522	37.7699	98.2151	24.3238	0.223412	0.0007737								66650-32	RC16-HM-129	37	2018-12-11	15.2833	3627386000		Sanidine	2	Crow01148		129.138.12.160	7.875	Ar40 = L @ 12/12/18 11:15 AM; Ar39 = L @ 12/12/18 11:15 AM; Ar38 = L @ 12/12/18 11:15 AM; Ar37 = L @ 12/12/18 11:15 AM; Ar36 = L @ 12/12/18 11:15 AM; Ar41 bk val,er = @ 12/12/18 11:25 AM; Average background @ 12/12/18 11:25 AM; Ar39 bk val,er = @ 12/12/18 11:25 AM; Average background @ 12/12/18 11:25 AM; Ar38 bk val,er = @ 12/12/18 11:25 AM; Average background @ 12/12/18 11:25 AM; Ar37 bk val,er …	B:2 DS	ALLLLLAAAAAA	1	Pychron Script	1	Fusions CO2	2.1	0	0	0	0	30	30	148			0
	05	2.1	3.59296	0.014782	0.5246	0.289966	34.5152	95.7158	24.3667	0.232635	0.0007737								66650-05	RC16-HM-129	37	2018-12-11	12.3167	3627376000		Sanidine	2	Crow01148		129.138.12.160	7.875	Ar40 = L @ 12/12/18 11:15 AM; Ar39 = L @ 12/12/18 11:15 AM; Ar38 = L @ 12/12/18 11:15 AM; Ar37 = L @ 12/12/18 11:15 AM; Ar36 = L @ 12/12/18 11:15 AM; Ar41 bk val,er = @ 12/12/18 11:25 AM; Average background @ 12/12/18 11:25 AM; Ar39 bk val,er = @ 12/12/18 11:25 AM; Average background @ 12/12/18 11:25 AM; Ar38 bk val,er = @ 12/12/18 11:25 AM; Average background @ 12/12/18 11:25 AM; Ar37 bk val,er …	B:2 DS	ALLLLLAAAAAA	1	Pychron Script	1	Fusions CO2	2.1	0	0	0	0	30	30	121			0
	48	2.1	3.53949	0.0072517	0.3216	0.196981	70.3565	97.3289	24.4076	0.346923	0.0007737								66650-48	RC16-HM-129	37	2018-12-11	17.3333	3627394000		Sanidine	2	Crow01148		129.138.12.160	7.875	Ar40 = L @ 12/12/18 11:15 AM; Ar39 = L @ 12/12/18 11:15 AM; Ar38 = L @ 12/12/18 11:15 AM; Ar37 = L @ 12/12/18 11:15 AM; Ar36 = L @ 12/12/18 11:15 AM; Ar41 bk val,er = @ 12/12/18 11:25 AM; Average background @ 12/12/18 11:25 AM; Ar39 bk val,er = @ 12/12/18 11:25 AM; Average background @ 12/12/18 11:25 AM; Ar38 bk val,er = @ 12/12/18 11:25 AM; Average background @ 12/12/18 11:25 AM; Ar37 bk val,er …	B:2 DS	ALLLLLAAAAAA	1	Pychron Script	1	Fusions CO2	2.1	0	0	0	0	30	30	164			0
	03	2.1	3.98156	0.0069278	0.0227	9.06364	73.6459	99.8457	28.1428	0.0093278	0.0007737								66650-03	RC16-HM-129	37	2018-12-11	11.3833	3627372000		Sanidine	2	Crow01148		129.138.12.160	7.875	Ar40 = L @ 12/12/18 11:15 AM; Ar39 = L @ 12/12/18 11:15 AM; Ar38 = L @ 12/12/18 11:15 AM; Ar37 = L @ 12/12/18 11:15 AM; Ar36 = L @ 12/12/18 11:15 AM; Ar41 bk val,er = @ 12/12/18 11:25 AM; Average background @ 12/12/18 11:25 AM; Ar39 bk val,er = @ 12/12/18 11:25 AM; Average background @ 12/12/18 11:25 AM; Ar38 bk val,er = @ 12/12/18 11:25 AM; Average background @ 12/12/18 11:25 AM; Ar37 bk val,er …	B:2 DS	ALLLLLAAAAAA	1	Pychron Script	1	Fusions CO2	2.1	0	0	0	0	30	30	119			0
	26	2.1	4.29047	0.0527965	0.7063	0.153619	9.6636	95.2327	28.9233	0.440614	0.0007737								66650-26	RC16-HM-129	37	2018-12-11	14.7	3627384000		Sanidine	2	Crow01148		129.138.12.160	7.875	Ar40 = L @ 12/12/18 11:15 AM; Ar39 = L @ 12/12/18 11:15 AM; Ar38 = L @ 12/12/18 11:15 AM; Ar37 = L @ 12/12/18 11:15 AM; Ar36 = L @ 12/12/18 11:15 AM; Ar41 bk val,er = @ 12/12/18 11:25 AM; Average background @ 12/12/18 11:25 AM; Ar39 bk val,er = @ 12/12/18 11:25 AM; Average background @ 12/12/18 11:25 AM; Ar38 bk val,er = @ 12/12/18 11:25 AM; Average background @ 12/12/18 11:25 AM; Ar37 bk val,er …	B:2 DS	ALLLLLAAAAAA	1	Pychron Script	1	Fusions CO2	2.1	0	0	0	0	30	30	142			0
	51	2.1	4.41224	0.0434462	0.8282	0.146842	11.7434	94.5289	29.5205	0.452341	0.0007737								66650-51	RC16-HM-129	37	2018-12-11	17.85	3627395000		Sanidine	2	Crow01148		129.138.12.160	7.875	Ar40 = L @ 12/12/18 11:15 AM; Ar39 = L @ 12/12/18 11:15 AM; Ar38 = L @ 12/12/18 11:15 AM; Ar37 = L @ 12/12/18 11:15 AM; Ar36 = L @ 12/12/18 11:15 AM; Ar41 bk val,er = @ 12/12/18 11:25 AM; Average background @ 12/12/18 11:25 AM; Ar39 bk val,er = @ 12/12/18 11:25 AM; Average background @ 12/12/18 11:25 AM; Ar38 bk val,er = @ 12/12/18 11:25 AM; Average background @ 12/12/18 11:25 AM; Ar37 bk val,er …	B:2 DS	ALLLLLAAAAAA	1	Pychron Script	1	Fusions CO2	2.1	0	0	0	0	30	30	167			0
	43	2.1	8.85345	0.0093577	0.548	0.268479	54.5224	98.1787	61.0354	0.376753	0.0007737								66650-43	RC16-HM-129	37	2018-12-11	16.6833	3627391000		Sanidine	2	Crow01148		129.138.12.160	7.875	Ar40 = L @ 12/12/18 11:15 AM; Ar39 = L @ 12/12/18 11:15 AM; Ar38 = L @ 12/12/18 11:15 AM; Ar37 = L @ 12/12/18 11:15 AM; Ar36 = L @ 12/12/18 11:15 AM; Ar41 bk val,er = @ 12/12/18 11:25 AM; Average background @ 12/12/18 11:25 AM; Ar39 bk val,er = @ 12/12/18 11:25 AM; Average background @ 12/12/18 11:25 AM; Ar38 bk val,er = @ 12/12/18 11:25 AM; Average background @ 12/12/18 11:25 AM; Ar37 bk val,er …	B:2 DS	ALLLLLAAAAAA	1	Pychron Script	1	Fusions CO2	2.1	0	0	0	0	30	30	159			0
	36	2.1	9.26059	0.0247021	1.1801	0.159356	20.6543	96.258	62.5695	0.62885	0.0007737								66650-36	RC16-HM-129	37	2018-12-11	15.9667	3627389000		Sanidine	2	Crow01148		129.138.12.160	7.875	Ar40 = L @ 12/12/18 11:15 AM; Ar39 = L @ 12/12/18 11:15 AM; Ar38 = L @ 12/12/18 11:15 AM; Ar37 = L @ 12/12/18 11:15 AM; Ar36 = L @ 12/12/18 11:15 AM; Ar41 bk val,er = @ 12/12/18 11:25 AM; Average background @ 12/12/18 11:25 AM; Ar39 bk val,er = @ 12/12/18 11:25 AM; Average background @ 12/12/18 11:25 AM; Ar38 bk val,er = @ 12/12/18 11:25 AM; Average background @ 12/12/18 11:25 AM; Ar37 bk val,er …	B:2 DS	ALLLLLAAAAAA	1	Pychron Script	1	Fusions CO2	2.1	0	0	0	0	30	30	152			0
	21	2.1	63.5841	0.0259965	0.8558	0.21614	19.6259	99.6059	404.362	2.04618	0.0007737								66650-21	RC16-HM-129	37	2018-12-11	14.05	3627382000		Sanidine	2	Crow01148		129.138.12.160	7.875	Ar40 = L @ 12/12/18 11:15 AM; Ar39 = L @ 12/12/18 11:15 AM; Ar38 = L @ 12/12/18 11:15 AM; Ar37 = L @ 12/12/18 11:15 AM; Ar36 = L @ 12/12/18 11:15 AM; Ar41 bk val,er = @ 12/12/18 11:25 AM; Average background @ 12/12/18 11:25 AM; Ar39 bk val,er = @ 12/12/18 11:25 AM; Average background @ 12/12/18 11:25 AM; Ar38 bk val,er = @ 12/12/18 11:25 AM; Average background @ 12/12/18 11:25 AM; Ar37 bk val,er …	B:2 DS	ALLLLLAAAAAA	1	Pychron Script	1	Fusions CO2	2.1	0	0	0	0	30	30	137			0
	27	2.1	63.5808	0.00898	0.8034	0.17532	56.8156	99.6279	404.418	2.88231	0.0007737								66650-27	RC16-HM-129	37	2018-12-11	14.7833	3627384000		Sanidine	2	Crow01148		129.138.12.160	7.875	Ar40 = L @ 12/12/18 11:15 AM; Ar39 = L @ 12/12/18 11:15 AM; Ar38 = L @ 12/12/18 11:15 AM; Ar37 = L @ 12/12/18 11:15 AM; Ar36 = L @ 12/12/18 11:15 AM; Ar41 bk val,er = @ 12/12/18 11:25 AM; Average background @ 12/12/18 11:25 AM; Ar39 bk val,er = @ 12/12/18 11:25 AM; Average background @ 12/12/18 11:25 AM; Ar38 bk val,er = @ 12/12/18 11:25 AM; Average background @ 12/12/18 11:25 AM; Ar37 bk val,er …	B:2 DS	ALLLLLAAAAAA	1	Pychron Script	1	Fusions CO2	2.1	0	0	0	0	30	30	143			0
				n=52
	KLC-16-PV-2-Cr, san, J=0.0039121±0.02%, IC=1.023875±0.001132, NM-283G, Lab#=64986, Argus VI
	53	3	3.43641	0.0769866	9.1076	1.5186	6.62718	21.6922	5.31909	0.0791901	0.001132								64986-53	KLC-16-PV-2	37	2016-05-21	21.5833	3546711000		san	5	Karlstrom		129.138.12.160	7.875	Ar41 bk val,er = @ 6/21/16 9:23 AM; Average background @ 6/21/16 9:23 AM; Ar40 bk val,er = @ 6/21/16 9:23 AM; Linear @ 6/21/16 9:23 AM; Ar39 bk val,er = @ 6/21/16 9:23 AM; Average background @ 6/21/16 9:23 AM; Ar38 bk val,er = @ 6/21/16 9:23 AM; Average background @ 6/21/16 9:23 AM; Ar37 bk val,er = @ 6/21/16 9:23 AM; Average background @ 6/21/16 9:23 AM; Ar36 bk val,er = @ 6/21/16 9:23 AM; Linea…		APPLLPAAAAAA	1	Pychron Script	1	Fusions CO2	3	3	0	3	0	30	30	155			0
	20	3	1.66206	0.0162026	1.4207	4.24807	31.489	74.7652	8.83757	0.024979	0.001132								64986-20	KLC-16-PV-2	37	2016-05-21	14.1833	3546685000		san	5	Karlstrom		129.138.12.160	7.875	Ar41 bk val,er = @ 6/21/16 9:23 AM; Average background @ 6/21/16 9:23 AM; Ar40 bk val,er = @ 6/21/16 9:23 AM; Linear @ 6/21/16 9:23 AM; Ar39 bk val,er = @ 6/21/16 9:23 AM; Average background @ 6/21/16 9:23 AM; Ar38 bk val,er = @ 6/21/16 9:23 AM; Average background @ 6/21/16 9:23 AM; Ar37 bk val,er = @ 6/21/16 9:23 AM; Average background @ 6/21/16 9:23 AM; Ar36 bk val,er = @ 6/21/16 9:23 AM; Linea…		APPLLPAAAAAA	1	Pychron Script	1	Fusions CO2	3	3	0	3	0	30	30	122			0
	82	3	1.62344	0.0070573	0.3129	3.85521	72.2945	94.3129	10.8819	0.0164615	0.001132								64986-82	KLC-16-PV-2	37	2016-05-22	4.05	3546735000		san	5	Karlstrom		129.138.12.160	7.875	Ar41 bk val,er = @ 6/21/16 9:24 AM; Average background @ 6/21/16 9:24 AM; Ar40 bk val,er = @ 6/21/16 9:24 AM; Linear @ 6/21/16 9:24 AM; Ar39 bk val,er = @ 6/21/16 9:24 AM; Average background @ 6/21/16 9:24 AM; Ar38 bk val,er = @ 6/21/16 9:24 AM; Average background @ 6/21/16 9:24 AM; Ar37 bk val,er = @ 6/21/16 9:24 AM; Average background @ 6/21/16 9:24 AM; Ar36 bk val,er = @ 6/21/16 9:24 AM; Linea…		APPLLPAAAAAA	1	Pychron Script	1	Fusions CO2	3	3	0	3	0	30	30	184			0
	86	3	2.04553	0.0198518	0.4199	4.19675	25.7006	93.9883	13.6666	0.0159002	0.001132								64986-86	KLC-16-PV-2	37	2016-05-22	4.68333	3546737000		san	5	Karlstrom		129.138.12.160	7.875	Ar41 bk val,er = @ 6/21/16 9:24 AM; Average background @ 6/21/16 9:24 AM; Ar40 bk val,er = @ 6/21/16 9:24 AM; Linear @ 6/21/16 9:24 AM; Ar39 bk val,er = @ 6/21/16 9:24 AM; Average background @ 6/21/16 9:24 AM; Ar38 bk val,er = @ 6/21/16 9:24 AM; Average background @ 6/21/16 9:24 AM; Ar37 bk val,er = @ 6/21/16 9:24 AM; Average background @ 6/21/16 9:24 AM; Ar36 bk val,er = @ 6/21/16 9:24 AM; Linea…		APPLLPAAAAAA	1	Pychron Script	1	Fusions CO2	3	3	0	3	0	30	30	188			0
	77	3	2.41858	0.0416879	0.4455	1.71834	12.2387	94.6776	16.2753	0.0345218	0.001132								64986-77	KLC-16-PV-2	37	2016-05-22	2.75	3546730000		san	5	Karlstrom		129.138.12.160	7.875	Ar41 bk val,er = @ 6/21/16 9:24 AM; Average background @ 6/21/16 9:24 AM; Ar40 bk val,er = @ 6/21/16 9:24 AM; Linear @ 6/21/16 9:24 AM; Ar39 bk val,er = @ 6/21/16 9:24 AM; Average background @ 6/21/16 9:24 AM; Ar38 bk val,er = @ 6/21/16 9:24 AM; Average background @ 6/21/16 9:24 AM; Ar37 bk val,er = @ 6/21/16 9:24 AM; Average background @ 6/21/16 9:24 AM; Ar36 bk val,er = @ 6/21/16 9:24 AM; Linea…		APPLLPAAAAAA	1	Pychron Script	1	Fusions CO2	3	3	0	3	0	30	30	179			0
	62	3	2.86135	0.0188925	1.511	0.732846	27.0056	84.4074	17.1699	0.0823364	0.001132								64986-62	KLC-16-PV-2	37	2016-05-21	23.5333	3546718000		san	5	Karlstrom		129.138.12.160	7.875	Ar41 bk val,er = @ 6/21/16 9:24 AM; Average background @ 6/21/16 9:24 AM; Ar40 bk val,er = @ 6/21/16 9:24 AM; Linear @ 6/21/16 9:24 AM; Ar39 bk val,er = @ 6/21/16 9:24 AM; Average background @ 6/21/16 9:24 AM; Ar38 bk val,er = @ 6/21/16 9:24 AM; Average background @ 6/21/16 9:24 AM; Ar37 bk val,er = @ 6/21/16 9:24 AM; Average background @ 6/21/16 9:24 AM; Ar36 bk val,er = @ 6/21/16 9:24 AM; Linea…		APPLLPAAAAAA	1	Pychron Script	1	Fusions CO2	3	3	0	3	0	30	30	164			0
	37	3	3.74471	0.0148397	4.4836	4.32836	34.381	64.5805	17.2027	0.033055	0.001132								64986-37	KLC-16-PV-2	37	2016-05-21	17.8833	3546698000		san	5	Karlstrom		129.138.12.160	7.875	Ar41 bk val,er = @ 6/21/16 9:23 AM; Average background @ 6/21/16 9:23 AM; Ar40 bk val,er = @ 6/21/16 9:23 AM; Linear @ 6/21/16 9:23 AM; Ar39 bk val,er = @ 6/21/16 9:23 AM; Average background @ 6/21/16 9:23 AM; Ar38 bk val,er = @ 6/21/16 9:23 AM; Average background @ 6/21/16 9:23 AM; Ar37 bk val,er = @ 6/21/16 9:23 AM; Average background @ 6/21/16 9:23 AM; Ar36 bk val,er = @ 6/21/16 9:23 AM; Linea…		APPLLPAAAAAA	1	Pychron Script	1	Fusions CO2	3	3	0	3	0	30	30	139			0
	102	3	2.44764	0.014769	0.0768	4.85245	34.5456	99.1178	17.239	0.0121679	0.001132								64986-102	KLC-16-PV-2	37	2016-05-22	8.63333	3546751000		san	5	Karlstrom		129.138.12.160	7.875	Ar41 bk val,er = @ 6/21/16 9:25 AM; Average background @ 6/21/16 9:25 AM; Ar40 bk val,er = @ 6/21/16 9:25 AM; Linear @ 6/21/16 9:25 AM; Ar39 bk val,er = @ 6/21/16 9:25 AM; Average background @ 6/21/16 9:25 AM; Ar38 bk val,er = @ 6/21/16 9:25 AM; Average background @ 6/21/16 9:25 AM; Ar37 bk val,er = @ 6/21/16 9:25 AM; Average background @ 6/21/16 9:25 AM; Ar36 bk val,er = @ 6/21/16 9:25 AM; Linea…		APPLLPAAAAAA	1	Pychron Script	1	Fusions CO2	3	3	0	3	0	30	30	204			0
	16	3	2.44981	0.0142859	0.0716	5.03835	35.7138	99.1792	17.265	0.0113379	0.001132								64986-16	KLC-16-PV-2	37	2016-05-21	12.3833	3546678000		san	5	Karlstrom		129.138.12.160	7.875	Ar41 bk val,er = @ 6/21/16 9:23 AM; Average background @ 6/21/16 9:23 AM; Ar40 bk val,er = @ 6/21/16 9:23 AM; Linear @ 6/21/16 9:23 AM; Ar39 bk val,er = @ 6/21/16 9:23 AM; Average background @ 6/21/16 9:23 AM; Ar38 bk val,er = @ 6/21/16 9:23 AM; Average background @ 6/21/16 9:23 AM; Ar37 bk val,er = @ 6/21/16 9:23 AM; Average background @ 6/21/16 9:23 AM; Ar36 bk val,er = @ 6/21/16 9:23 AM; Linea…		APPLLPAAAAAA	1	Pychron Script	1	Fusions CO2	3	3	0	3	0	30	30	118			0
	71	3	2.59458	0.0191355	0.5601	3.61495	26.6627	93.6609	17.2708	0.0189949	0.001132								64986-71	KLC-16-PV-2	37	2016-05-22	1.78333	3546726000		san	5	Karlstrom		129.138.12.160	7.875	Ar41 bk val,er = @ 6/21/16 9:24 AM; Average background @ 6/21/16 9:24 AM; Ar40 bk val,er = @ 6/21/16 9:24 AM; Linear @ 6/21/16 9:24 AM; Ar39 bk val,er = @ 6/21/16 9:24 AM; Average background @ 6/21/16 9:24 AM; Ar38 bk val,er = @ 6/21/16 9:24 AM; Average background @ 6/21/16 9:24 AM; Ar37 bk val,er = @ 6/21/16 9:24 AM; Average background @ 6/21/16 9:24 AM; Ar36 bk val,er = @ 6/21/16 9:24 AM; Linea…		APPLLPAAAAAA	1	Pychron Script	1	Fusions CO2	3	3	0	3	0	30	30	173			0
	72	3	2.45434	0.0162863	0.0843	4.98103	31.3272	99.0343	17.2717	0.0118749	0.001132								64986-72	KLC-16-PV-2	37	2016-05-22	2.01667	3546727000		san	5	Karlstrom		129.138.12.160	7.875	Ar41 bk val,er = @ 6/21/16 9:24 AM; Average background @ 6/21/16 9:24 AM; Ar40 bk val,er = @ 6/21/16 9:24 AM; Linear @ 6/21/16 9:24 AM; Ar39 bk val,er = @ 6/21/16 9:24 AM; Average background @ 6/21/16 9:24 AM; Ar38 bk val,er = @ 6/21/16 9:24 AM; Average background @ 6/21/16 9:24 AM; Ar37 bk val,er = @ 6/21/16 9:24 AM; Average background @ 6/21/16 9:24 AM; Ar36 bk val,er = @ 6/21/16 9:24 AM; Linea…		APPLLPAAAAAA	1	Pychron Script	1	Fusions CO2	3	3	0	3	0	30	30	174			0
	12	3	2.53192	0.0137049	0.3449	5.74368	37.2279	96.0051	17.2742	0.0118073	0.001132								64986-12	KLC-16-PV-2	37	2016-05-21	11.5	3546675000		san	5	Karlstrom		129.138.12.160	7.875	Ar41 bk val,er = @ 6/21/16 9:22 AM; Average background @ 6/21/16 9:22 AM; Ar40 bk val,er = @ 6/21/16 9:22 AM; Linear @ 6/21/16 9:22 AM; Ar39 bk val,er = @ 6/21/16 9:22 AM; Average background @ 6/21/16 9:22 AM; Ar38 bk val,er = @ 6/21/16 9:22 AM; Average background @ 6/21/16 9:22 AM; Ar37 bk val,er = @ 6/21/16 9:22 AM; Average background @ 6/21/16 9:22 AM; Ar36 bk val,er = @ 6/21/16 9:22 AM; Linea…		APPLLPAAAAAA	1	Pychron Script	1	Fusions CO2	3	3	0	3	0	30	30	114			0
	15	3	2.51307	0.0158074	0.2806	2.49193	32.2763	96.7404	17.2766	0.0234926	0.001132								64986-15	KLC-16-PV-2	37	2016-05-21	12.1667	3546677000		san	5	Karlstrom		129.138.12.160	7.875	Ar41 bk val,er = @ 6/21/16 9:22 AM; Average background @ 6/21/16 9:22 AM; Ar40 bk val,er = @ 6/21/16 9:22 AM; Linear @ 6/21/16 9:22 AM; Ar39 bk val,er = @ 6/21/16 9:22 AM; Average background @ 6/21/16 9:22 AM; Ar38 bk val,er = @ 6/21/16 9:22 AM; Average background @ 6/21/16 9:22 AM; Ar37 bk val,er = @ 6/21/16 9:22 AM; Average background @ 6/21/16 9:22 AM; Ar36 bk val,er = @ 6/21/16 9:22 AM; Linea…		APPLLPAAAAAA	1	Pychron Script	1	Fusions CO2	3	3	0	3	0	30	30	117			0
	14	3	2.4939	0.014225	0.2147	3.53069	35.8667	97.4936	17.2779	0.017243	0.001132								64986-14	KLC-16-PV-2	37	2016-05-21	11.95	3546677000		san	5	Karlstrom		129.138.12.160	7.875	Ar41 bk val,er = @ 6/21/16 9:22 AM; Average background @ 6/21/16 9:22 AM; Ar40 bk val,er = @ 6/21/16 9:22 AM; Linear @ 6/21/16 9:22 AM; Ar39 bk val,er = @ 6/21/16 9:22 AM; Average background @ 6/21/16 9:22 AM; Ar38 bk val,er = @ 6/21/16 9:22 AM; Average background @ 6/21/16 9:22 AM; Ar37 bk val,er = @ 6/21/16 9:22 AM; Average background @ 6/21/16 9:22 AM; Ar36 bk val,er = @ 6/21/16 9:22 AM; Linea…		APPLLPAAAAAA	1	Pychron Script	1	Fusions CO2	3	3	0	3	0	30	30	116			0
	101	3	2.46206	0.0147522	0.1067	5.3714	34.5849	98.7629	17.2787	0.0113028	0.001132								64986-101	KLC-16-PV-2	37	2016-05-22	8.41667	3546750000		san	5	Karlstrom		129.138.12.160	7.875	Ar41 bk val,er = @ 6/21/16 9:25 AM; Average background @ 6/21/16 9:25 AM; Ar40 bk val,er = @ 6/21/16 9:25 AM; Linear @ 6/21/16 9:25 AM; Ar39 bk val,er = @ 6/21/16 9:25 AM; Average background @ 6/21/16 9:25 AM; Ar38 bk val,er = @ 6/21/16 9:25 AM; Average background @ 6/21/16 9:25 AM; Ar37 bk val,er = @ 6/21/16 9:25 AM; Average background @ 6/21/16 9:25 AM; Ar36 bk val,er = @ 6/21/16 9:25 AM; Linea…		APPLLPAAAAAA	1	Pychron Script	1	Fusions CO2	3	3	0	3	0	30	30	203			0
	01	3	2.59483	0.0155458	0.5559	7.20938	32.8194	93.6991	17.2795	0.01125	0.001132								64986-01	KLC-16-PV-2	37	2016-05-21	2.53333	3546643000		san	5	Karlstrom		129.138.12.160	7.875	Ar41 bk val,er = @ 6/21/16 9:22 AM; Average background @ 6/21/16 9:22 AM; Ar40 bk val,er = @ 6/21/16 9:22 AM; Linear @ 6/21/16 9:22 AM; Ar39 bk val,er = @ 6/21/16 9:22 AM; Average background @ 6/21/16 9:22 AM; Ar38 bk val,er = @ 6/21/16 9:22 AM; Average background @ 6/21/16 9:22 AM; Ar37 bk val,er = @ 6/21/16 9:22 AM; Average background @ 6/21/16 9:22 AM; Ar36 bk val,er = @ 6/21/16 9:22 AM; Linea…		APPLLPAAAAAA	1	Pychron Script	1	Fusions CO2	3	3	0	3	0	30	30	103			0
	21	3	2.46	0.0117835	0.0981	4.62401	43.2982	98.8563	17.2804	0.0128479	0.001132								64986-21	KLC-16-PV-2	37	2016-05-21	14.4	3546685000		san	5	Karlstrom		129.138.12.160	7.875	Ar41 bk val,er = @ 6/21/16 9:23 AM; Average background @ 6/21/16 9:23 AM; Ar40 bk val,er = @ 6/21/16 9:23 AM; Linear @ 6/21/16 9:23 AM; Ar39 bk val,er = @ 6/21/16 9:23 AM; Average background @ 6/21/16 9:23 AM; Ar38 bk val,er = @ 6/21/16 9:23 AM; Average background @ 6/21/16 9:23 AM; Ar37 bk val,er = @ 6/21/16 9:23 AM; Average background @ 6/21/16 9:23 AM; Ar36 bk val,er = @ 6/21/16 9:23 AM; Linea…		APPLLPAAAAAA	1	Pychron Script	1	Fusions CO2	3	3	0	3	0	30	30	123			0
	26	3	2.45639	0.0163864	0.083	2.82938	31.1358	99.0515	17.2891	0.0195784	0.001132								64986-26	KLC-16-PV-2	37	2016-05-21	15.5	3546689000		san	5	Karlstrom		129.138.12.160	7.875	Ar41 bk val,er = @ 6/21/16 9:23 AM; Average background @ 6/21/16 9:23 AM; Ar40 bk val,er = @ 6/21/16 9:23 AM; Linear @ 6/21/16 9:23 AM; Ar39 bk val,er = @ 6/21/16 9:23 AM; Average background @ 6/21/16 9:23 AM; Ar38 bk val,er = @ 6/21/16 9:23 AM; Average background @ 6/21/16 9:23 AM; Ar37 bk val,er = @ 6/21/16 9:23 AM; Average background @ 6/21/16 9:23 AM; Ar36 bk val,er = @ 6/21/16 9:23 AM; Linea…		APPLLPAAAAAA	1	Pychron Script	1	Fusions CO2	3	3	0	3	0	30	30	128			0
	24	3	2.47194	0.0156331	0.1335	3.47665	32.6361	98.4495	17.2931	0.0166863	0.001132								64986-24	KLC-16-PV-2	37	2016-05-21	15.05	3546688000		san	5	Karlstrom		129.138.12.160	7.875	Ar41 bk val,er = @ 6/21/16 9:23 AM; Average background @ 6/21/16 9:23 AM; Ar40 bk val,er = @ 6/21/16 9:23 AM; Linear @ 6/21/16 9:23 AM; Ar39 bk val,er = @ 6/21/16 9:23 AM; Average background @ 6/21/16 9:23 AM; Ar38 bk val,er = @ 6/21/16 9:23 AM; Average background @ 6/21/16 9:23 AM; Ar37 bk val,er = @ 6/21/16 9:23 AM; Average background @ 6/21/16 9:23 AM; Ar36 bk val,er = @ 6/21/16 9:23 AM; Linea…		APPLLPAAAAAA	1	Pychron Script	1	Fusions CO2	3	3	0	3	0	30	30	126			0
	04	3	2.46704	0.0178773	0.1172	5.65401	28.5392	98.6493	17.2938	0.0106228	0.001132								64986-04	KLC-16-PV-2	37	2016-05-21	3.2	3546645000		san	5	Karlstrom		129.138.12.160	7.875	Ar41 bk val,er = @ 6/21/16 9:22 AM; Average background @ 6/21/16 9:22 AM; Ar40 bk val,er = @ 6/21/16 9:22 AM; Linear @ 6/21/16 9:22 AM; Ar39 bk val,er = @ 6/21/16 9:22 AM; Average background @ 6/21/16 9:22 AM; Ar38 bk val,er = @ 6/21/16 9:22 AM; Average background @ 6/21/16 9:22 AM; Ar37 bk val,er = @ 6/21/16 9:22 AM; Average background @ 6/21/16 9:22 AM; Ar36 bk val,er = @ 6/21/16 9:22 AM; Linea…		APPLLPAAAAAA	1	Pychron Script	1	Fusions CO2	3	3	0	3	0	30	30	106			0
	61	3	3.19369	0.0239834	2.5767	7.36161	21.2732	76.1628	17.2964	0.020186	0.001132								64986-61	KLC-16-PV-2	37	2016-05-21	23.3167	3546718000		san	5	Karlstrom		129.138.12.160	7.875	Ar41 bk val,er = @ 6/21/16 9:24 AM; Average background @ 6/21/16 9:24 AM; Ar40 bk val,er = @ 6/21/16 9:24 AM; Linear @ 6/21/16 9:24 AM; Ar39 bk val,er = @ 6/21/16 9:24 AM; Average background @ 6/21/16 9:24 AM; Ar38 bk val,er = @ 6/21/16 9:24 AM; Average background @ 6/21/16 9:24 AM; Ar37 bk val,er = @ 6/21/16 9:24 AM; Average background @ 6/21/16 9:24 AM; Ar36 bk val,er = @ 6/21/16 9:24 AM; Linea…		APPLLPAAAAAA	1	Pychron Script	1	Fusions CO2	3	3	0	3	0	30	30	163			0
	11	3	2.50122	0.0199849	0.2318	5.6687	25.5295	97.3168	17.2973	0.0114099	0.001132								64986-11	KLC-16-PV-2	37	2016-05-21	11.2833	3546674000		san	5	Karlstrom		129.138.12.160	7.875	Ar41 bk val,er = @ 6/21/16 9:22 AM; Average background @ 6/21/16 9:22 AM; Ar40 bk val,er = @ 6/21/16 9:22 AM; Linear @ 6/21/16 9:22 AM; Ar39 bk val,er = @ 6/21/16 9:22 AM; Average background @ 6/21/16 9:22 AM; Ar38 bk val,er = @ 6/21/16 9:22 AM; Average background @ 6/21/16 9:22 AM; Ar37 bk val,er = @ 6/21/16 9:22 AM; Average background @ 6/21/16 9:22 AM; Ar36 bk val,er = @ 6/21/16 9:22 AM; Linea…		APPLLPAAAAAA	1	Pychron Script	1	Fusions CO2	3	3	0	3	0	30	30	113			0
	30	3	2.65758	0.0166767	0.758	5.22837	30.5938	91.598	17.3015	0.0151606	0.001132								64986-30	KLC-16-PV-2	37	2016-05-21	16.25	3546692000		san	5	Karlstrom		129.138.12.160	7.875	Ar41 bk val,er = @ 6/21/16 9:23 AM; Average background @ 6/21/16 9:23 AM; Ar40 bk val,er = @ 6/21/16 9:23 AM; Linear @ 6/21/16 9:23 AM; Ar39 bk val,er = @ 6/21/16 9:23 AM; Average background @ 6/21/16 9:23 AM; Ar38 bk val,er = @ 6/21/16 9:23 AM; Average background @ 6/21/16 9:23 AM; Ar37 bk val,er = @ 6/21/16 9:23 AM; Average background @ 6/21/16 9:23 AM; Ar36 bk val,er = @ 6/21/16 9:23 AM; Linea…		APPLLPAAAAAA	1	Pychron Script	1	Fusions CO2	3	3	0	3	0	30	30	132			0
	48	3	2.91103	0.0272058	1.6172	3.21638	18.7535	83.6159	17.3044	0.0266209	0.001132								64986-48	KLC-16-PV-2	37	2016-05-21	20.7167	3546708000		san	5	Karlstrom		129.138.12.160	7.875	Ar41 bk val,er = @ 6/21/16 9:23 AM; Average background @ 6/21/16 9:23 AM; Ar40 bk val,er = @ 6/21/16 9:23 AM; Linear @ 6/21/16 9:23 AM; Ar39 bk val,er = @ 6/21/16 9:23 AM; Average background @ 6/21/16 9:23 AM; Ar38 bk val,er = @ 6/21/16 9:23 AM; Average background @ 6/21/16 9:23 AM; Ar37 bk val,er = @ 6/21/16 9:23 AM; Average background @ 6/21/16 9:23 AM; Ar36 bk val,er = @ 6/21/16 9:23 AM; Linea…		APPLLPAAAAAA	1	Pychron Script	1	Fusions CO2	3	3	0	3	0	30	30	150			0
	09	3	2.5683	0.0153692	0.453	3.69268	33.1965	94.8205	17.3068	0.0173128	0.001132								64986-09	KLC-16-PV-2	37	2016-05-21	10.85	3546673000		san	5	Karlstrom		129.138.12.160	7.875	Ar41 bk val,er = @ 6/21/16 9:22 AM; Average background @ 6/21/16 9:22 AM; Ar40 bk val,er = @ 6/21/16 9:22 AM; Linear @ 6/21/16 9:22 AM; Ar39 bk val,er = @ 6/21/16 9:22 AM; Average background @ 6/21/16 9:22 AM; Ar38 bk val,er = @ 6/21/16 9:22 AM; Average background @ 6/21/16 9:22 AM; Ar37 bk val,er = @ 6/21/16 9:22 AM; Average background @ 6/21/16 9:22 AM; Ar36 bk val,er = @ 6/21/16 9:22 AM; Linea…		APPLLPAAAAAA	1	Pychron Script	1	Fusions CO2	3	3	0	3	0	30	30	111			0
	43	3	2.47771	0.0184583	0.1441	5.6954	27.6409	98.3353	17.3134	0.0107221	0.001132								64986-43	KLC-16-PV-2	37	2016-05-21	18.7	3546701000		san	5	Karlstrom		129.138.12.160	7.875	Ar41 bk val,er = @ 6/21/16 9:23 AM; Average background @ 6/21/16 9:23 AM; Ar40 bk val,er = @ 6/21/16 9:23 AM; Linear @ 6/21/16 9:23 AM; Ar39 bk val,er = @ 6/21/16 9:23 AM; Average background @ 6/21/16 9:23 AM; Ar38 bk val,er = @ 6/21/16 9:23 AM; Average background @ 6/21/16 9:23 AM; Ar37 bk val,er = @ 6/21/16 9:23 AM; Average background @ 6/21/16 9:23 AM; Ar36 bk val,er = @ 6/21/16 9:23 AM; Linea…		APPLLPAAAAAA	1	Pychron Script	1	Fusions CO2	3	3	0	3	0	30	30	145			0
	36	3	2.69048	0.0177184	0.8635	6.49732	28.7952	90.5423	17.3144	0.01325	0.001132								64986-36	KLC-16-PV-2	37	2016-05-21	17.65	3546697000		san	5	Karlstrom		129.138.12.160	7.875	Ar41 bk val,er = @ 6/21/16 9:23 AM; Average background @ 6/21/16 9:23 AM; Ar40 bk val,er = @ 6/21/16 9:23 AM; Linear @ 6/21/16 9:23 AM; Ar39 bk val,er = @ 6/21/16 9:23 AM; Average background @ 6/21/16 9:23 AM; Ar38 bk val,er = @ 6/21/16 9:23 AM; Average background @ 6/21/16 9:23 AM; Ar37 bk val,er = @ 6/21/16 9:23 AM; Average background @ 6/21/16 9:23 AM; Ar36 bk val,er = @ 6/21/16 9:23 AM; Linea…		APPLLPAAAAAA	1	Pychron Script	1	Fusions CO2	3	3	0	3	0	30	30	138			0
	13	3	2.51051	0.0160061	0.251	1.25194	31.8756	97.0878	17.3207	0.0444441	0.001132								64986-13	KLC-16-PV-2	37	2016-05-21	11.7333	3546676000		san	5	Karlstrom		129.138.12.160	7.875	Ar41 bk val,er = @ 6/21/16 9:22 AM; Average background @ 6/21/16 9:22 AM; Ar40 bk val,er = @ 6/21/16 9:22 AM; Linear @ 6/21/16 9:22 AM; Ar39 bk val,er = @ 6/21/16 9:22 AM; Average background @ 6/21/16 9:22 AM; Ar38 bk val,er = @ 6/21/16 9:22 AM; Average background @ 6/21/16 9:22 AM; Ar37 bk val,er = @ 6/21/16 9:22 AM; Average background @ 6/21/16 9:22 AM; Ar36 bk val,er = @ 6/21/16 9:22 AM; Linea…		APPLLPAAAAAA	1	Pychron Script	1	Fusions CO2	3	3	0	3	0	30	30	115			0
	44	3	2.47388	0.014974	0.1218	2.61391	34.0727	98.5887	17.331	0.0220232	0.001132								64986-44	KLC-16-PV-2	37	2016-05-21	19.9667	3546706000		san	5	Karlstrom		129.138.12.160	7.875	Ar41 bk val,er = @ 6/21/16 9:23 AM; Average background @ 6/21/16 9:23 AM; Ar40 bk val,er = @ 6/21/16 9:23 AM; Linear @ 6/21/16 9:23 AM; Ar39 bk val,er = @ 6/21/16 9:23 AM; Average background @ 6/21/16 9:23 AM; Ar38 bk val,er = @ 6/21/16 9:23 AM; Average background @ 6/21/16 9:23 AM; Ar37 bk val,er = @ 6/21/16 9:23 AM; Average background @ 6/21/16 9:23 AM; Ar36 bk val,er = @ 6/21/16 9:23 AM; Linea…		APPLLPAAAAAA	1	Pychron Script	1	Fusions CO2	3	3	0	3	0	30	30	146			0
	03	3	3.77039	0.0192573	4.5064	4.41341	26.4941	64.6521	17.3395	0.0339636	0.001132								64986-03	KLC-16-PV-2	37	2016-05-21	2.98333	3546644000		san	5	Karlstrom		129.138.12.160	7.875	Ar41 bk val,er = @ 6/21/16 9:22 AM; Average background @ 6/21/16 9:22 AM; Ar40 bk val,er = @ 6/21/16 9:22 AM; Linear @ 6/21/16 9:22 AM; Ar39 bk val,er = @ 6/21/16 9:22 AM; Average background @ 6/21/16 9:22 AM; Ar38 bk val,er = @ 6/21/16 9:22 AM; Average background @ 6/21/16 9:22 AM; Ar37 bk val,er = @ 6/21/16 9:22 AM; Average background @ 6/21/16 9:22 AM; Ar36 bk val,er = @ 6/21/16 9:22 AM; Linea…		APPLLPAAAAAA	1	Pychron Script	1	Fusions CO2	3	3	0	3	0	30	30	105			0
	79	3	2.47081	0.0137311	0.1065	3.78791	37.1568	98.7661	17.3405	0.0153448	0.001132								64986-79	KLC-16-PV-2	37	2016-05-22	3.18333	3546731000		san	5	Karlstrom		129.138.12.160	7.875	Ar41 bk val,er = @ 6/21/16 9:24 AM; Average background @ 6/21/16 9:24 AM; Ar40 bk val,er = @ 6/21/16 9:24 AM; Linear @ 6/21/16 9:24 AM; Ar39 bk val,er = @ 6/21/16 9:24 AM; Average background @ 6/21/16 9:24 AM; Ar38 bk val,er = @ 6/21/16 9:24 AM; Average background @ 6/21/16 9:24 AM; Ar37 bk val,er = @ 6/21/16 9:24 AM; Average background @ 6/21/16 9:24 AM; Ar36 bk val,er = @ 6/21/16 9:24 AM; Linea…		APPLLPAAAAAA	1	Pychron Script	1	Fusions CO2	3	3	0	3	0	30	30	181			0
	80	3	2.56439	0.017333	0.4138	3.7769	29.4354	95.2715	17.3623	0.0177508	0.001132								64986-80	KLC-16-PV-2	37	2016-05-22	3.61667	3546733000		san	5	Karlstrom		129.138.12.160	7.875	Ar41 bk val,er = @ 6/21/16 9:24 AM; Average background @ 6/21/16 9:24 AM; Ar40 bk val,er = @ 6/21/16 9:24 AM; Linear @ 6/21/16 9:24 AM; Ar39 bk val,er = @ 6/21/16 9:24 AM; Average background @ 6/21/16 9:24 AM; Ar38 bk val,er = @ 6/21/16 9:24 AM; Average background @ 6/21/16 9:24 AM; Ar37 bk val,er = @ 6/21/16 9:24 AM; Average background @ 6/21/16 9:24 AM; Ar36 bk val,er = @ 6/21/16 9:24 AM; Linea…		APPLLPAAAAAA	1	Pychron Script	1	Fusions CO2	3	3	0	3	0	30	30	182			0
	17	3	2.49278	0.0133964	0.1698	3.82369	38.0852	98.0241	17.3636	0.0156141	0.001132								64986-17	KLC-16-PV-2	37	2016-05-21	12.6	3546679000		san	5	Karlstrom		129.138.12.160	7.875	Ar41 bk val,er = @ 6/21/16 9:23 AM; Average background @ 6/21/16 9:23 AM; Ar40 bk val,er = @ 6/21/16 9:23 AM; Linear @ 6/21/16 9:23 AM; Ar39 bk val,er = @ 6/21/16 9:23 AM; Average background @ 6/21/16 9:23 AM; Ar38 bk val,er = @ 6/21/16 9:23 AM; Average background @ 6/21/16 9:23 AM; Ar37 bk val,er = @ 6/21/16 9:23 AM; Average background @ 6/21/16 9:23 AM; Ar36 bk val,er = @ 6/21/16 9:23 AM; Linea…		APPLLPAAAAAA	1	Pychron Script	1	Fusions CO2	3	3	0	3	0	30	30	119			0
	05	3	3.35442	0.0142616	3.0766	4.9806	35.7747	72.8707	17.383	0.0255546	0.001132								64986-05	KLC-16-PV-2	37	2016-05-21	3.43333	3546646000		san	5	Karlstrom		129.138.12.160	7.875	Ar41 bk val,er = @ 6/21/16 9:22 AM; Average background @ 6/21/16 9:22 AM; Ar40 bk val,er = @ 6/21/16 9:22 AM; Linear @ 6/21/16 9:22 AM; Ar39 bk val,er = @ 6/21/16 9:22 AM; Average background @ 6/21/16 9:22 AM; Ar38 bk val,er = @ 6/21/16 9:22 AM; Average background @ 6/21/16 9:22 AM; Ar37 bk val,er = @ 6/21/16 9:22 AM; Average background @ 6/21/16 9:22 AM; Ar36 bk val,er = @ 6/21/16 9:22 AM; Linea…		APPLLPAAAAAA	1	Pychron Script	1	Fusions CO2	3	3	0	3	0	30	30	107			0
	33	3	3.26997	0.0210661	2.7884	3.76917	24.2192	74.796	17.3922	0.0307388	0.001132								64986-33	KLC-16-PV-2	37	2016-05-21	17	3546695000		san	5	Karlstrom		129.138.12.160	7.875	Ar41 bk val,er = @ 6/21/16 9:23 AM; Average background @ 6/21/16 9:23 AM; Ar40 bk val,er = @ 6/21/16 9:23 AM; Linear @ 6/21/16 9:23 AM; Ar39 bk val,er = @ 6/21/16 9:23 AM; Average background @ 6/21/16 9:23 AM; Ar38 bk val,er = @ 6/21/16 9:23 AM; Average background @ 6/21/16 9:23 AM; Ar37 bk val,er = @ 6/21/16 9:23 AM; Average background @ 6/21/16 9:23 AM; Ar36 bk val,er = @ 6/21/16 9:23 AM; Linea…		APPLLPAAAAAA	1	Pychron Script	1	Fusions CO2	3	3	0	3	0	30	30	135			0
	39	3	4.75981	0.0175642	7.8238	3.34908	29.0479	51.3814	17.4034	0.0486673	0.001132								64986-39	KLC-16-PV-2	37	2016-05-21	18.2	3546699000		san	5	Karlstrom		129.138.12.160	7.875	Ar41 bk val,er = @ 6/21/16 9:23 AM; Average background @ 6/21/16 9:23 AM; Ar40 bk val,er = @ 6/21/16 9:23 AM; Linear @ 6/21/16 9:23 AM; Ar39 bk val,er = @ 6/21/16 9:23 AM; Average background @ 6/21/16 9:23 AM; Ar38 bk val,er = @ 6/21/16 9:23 AM; Average background @ 6/21/16 9:23 AM; Ar37 bk val,er = @ 6/21/16 9:23 AM; Average background @ 6/21/16 9:23 AM; Ar36 bk val,er = @ 6/21/16 9:23 AM; Linea…		APPLLPAAAAAA	1	Pychron Script	1	Fusions CO2	3	3	0	3	0	30	30	141			0
	35	3	2.54777	0.0135721	0.3331	1.53296	37.5921	96.1671	17.4114	0.0375994	0.001132								64986-35	KLC-16-PV-2	37	2016-05-21	17.4333	3546696000		san	5	Karlstrom		129.138.12.160	7.875	Ar41 bk val,er = @ 6/21/16 9:23 AM; Average background @ 6/21/16 9:23 AM; Ar40 bk val,er = @ 6/21/16 9:23 AM; Linear @ 6/21/16 9:23 AM; Ar39 bk val,er = @ 6/21/16 9:23 AM; Average background @ 6/21/16 9:23 AM; Ar38 bk val,er = @ 6/21/16 9:23 AM; Average background @ 6/21/16 9:23 AM; Ar37 bk val,er = @ 6/21/16 9:23 AM; Average background @ 6/21/16 9:23 AM; Ar36 bk val,er = @ 6/21/16 9:23 AM; Linea…		APPLLPAAAAAA	1	Pychron Script	1	Fusions CO2	3	3	0	3	0	30	30	137			0
	07	3	2.56182	0.014292	0.3621	5.05912	35.6986	95.855	17.4507	0.0133136	0.001132								64986-07	KLC-16-PV-2	37	2016-05-21	10.5	3546671000		san	5	Karlstrom		129.138.12.160	7.875	Ar41 bk val,er = @ 6/21/16 9:22 AM; Average background @ 6/21/16 9:22 AM; Ar40 bk val,er = @ 6/21/16 9:22 AM; Linear @ 6/21/16 9:22 AM; Ar39 bk val,er = @ 6/21/16 9:22 AM; Average background @ 6/21/16 9:22 AM; Ar38 bk val,er = @ 6/21/16 9:22 AM; Average background @ 6/21/16 9:22 AM; Ar37 bk val,er = @ 6/21/16 9:22 AM; Average background @ 6/21/16 9:22 AM; Ar36 bk val,er = @ 6/21/16 9:22 AM; Linea…		APPLLPAAAAAA	1	Pychron Script	1	Fusions CO2	3	3	0	3	0	30	30	109			0
	55	3	2.52977	0.0125487	0.2453	2.89269	40.6579	97.1659	17.4672	0.0204055	0.001132								64986-55	KLC-16-PV-2	37	2016-05-21	21.9	3546712000		san	5	Karlstrom		129.138.12.160	7.875	Ar41 bk val,er = @ 6/21/16 9:23 AM; Average background @ 6/21/16 9:23 AM; Ar40 bk val,er = @ 6/21/16 9:23 AM; Linear @ 6/21/16 9:23 AM; Ar39 bk val,er = @ 6/21/16 9:23 AM; Average background @ 6/21/16 9:23 AM; Ar38 bk val,er = @ 6/21/16 9:23 AM; Average background @ 6/21/16 9:23 AM; Ar37 bk val,er = @ 6/21/16 9:23 AM; Average background @ 6/21/16 9:23 AM; Ar36 bk val,er = @ 6/21/16 9:23 AM; Linea…		APPLLPAAAAAA	1	Pychron Script	1	Fusions CO2	3	3	0	3	0	30	30	157			0
	45	3	2.53102	0.0172822	0.2385	3.48923	29.5219	97.2613	17.493	0.0175263	0.001132								64986-45	KLC-16-PV-2	37	2016-05-21	20.1833	3546706000		san	5	Karlstrom		129.138.12.160	7.875	Ar41 bk val,er = @ 6/21/16 9:23 AM; Average background @ 6/21/16 9:23 AM; Ar40 bk val,er = @ 6/21/16 9:23 AM; Linear @ 6/21/16 9:23 AM; Ar39 bk val,er = @ 6/21/16 9:23 AM; Average background @ 6/21/16 9:23 AM; Ar38 bk val,er = @ 6/21/16 9:23 AM; Average background @ 6/21/16 9:23 AM; Ar37 bk val,er = @ 6/21/16 9:23 AM; Average background @ 6/21/16 9:23 AM; Ar36 bk val,er = @ 6/21/16 9:23 AM; Linea…		APPLLPAAAAAA	1	Pychron Script	1	Fusions CO2	3	3	0	3	0	30	30	147			0
	10	3	4.87142	0.0166388	8.1087	2.06321	30.6635	50.7644	17.5973	0.0692681	0.001132								64986-10	KLC-16-PV-2	37	2016-05-21	11.0667	3546673000		san	5	Karlstrom		129.138.12.160	7.875	Ar41 bk val,er = @ 6/21/16 9:22 AM; Average background @ 6/21/16 9:22 AM; Ar40 bk val,er = @ 6/21/16 9:22 AM; Linear @ 6/21/16 9:22 AM; Ar39 bk val,er = @ 6/21/16 9:22 AM; Average background @ 6/21/16 9:22 AM; Ar38 bk val,er = @ 6/21/16 9:22 AM; Average background @ 6/21/16 9:22 AM; Ar37 bk val,er = @ 6/21/16 9:22 AM; Average background @ 6/21/16 9:22 AM; Ar36 bk val,er = @ 6/21/16 9:22 AM; Linea…		APPLLPAAAAAA	1	Pychron Script	1	Fusions CO2	3	3	0	3	0	30	30	112			0
	02	3	7.81208	0.025143	18.0166	0.538859	20.2921	31.8116	17.6939	0.193868	0.001132								64986-02	KLC-16-PV-2	37	2016-05-21	2.76667	3546644000		san	5	Karlstrom		129.138.12.160	7.875	Ar41 bk val,er = @ 6/21/16 9:22 AM; Average background @ 6/21/16 9:22 AM; Ar40 bk val,er = @ 6/21/16 9:22 AM; Linear @ 6/21/16 9:22 AM; Ar39 bk val,er = @ 6/21/16 9:22 AM; Average background @ 6/21/16 9:22 AM; Ar38 bk val,er = @ 6/21/16 9:22 AM; Average background @ 6/21/16 9:22 AM; Ar37 bk val,er = @ 6/21/16 9:22 AM; Average background @ 6/21/16 9:22 AM; Ar36 bk val,er = @ 6/21/16 9:22 AM; Linea…		APPLLPAAAAAA	1	Pychron Script	1	Fusions CO2	3	3	0	3	0	30	30	104			0
	78	3	2.64903	0.0442015	0.4852	1.44075	11.5427	94.706	17.8286	0.0411212	0.001132								64986-78	KLC-16-PV-2	37	2016-05-22	2.96667	3546731000		san	5	Karlstrom		129.138.12.160	7.875	Ar41 bk val,er = @ 6/21/16 9:24 AM; Average background @ 6/21/16 9:24 AM; Ar40 bk val,er = @ 6/21/16 9:24 AM; Linear @ 6/21/16 9:24 AM; Ar39 bk val,er = @ 6/21/16 9:24 AM; Average background @ 6/21/16 9:24 AM; Ar38 bk val,er = @ 6/21/16 9:24 AM; Average background @ 6/21/16 9:24 AM; Ar37 bk val,er = @ 6/21/16 9:24 AM; Average background @ 6/21/16 9:24 AM; Ar36 bk val,er = @ 6/21/16 9:24 AM; Linea…		APPLLPAAAAAA	1	Pychron Script	1	Fusions CO2	3	3	0	3	0	30	30	180			0
	57	3	3.41323	0.0259425	0.454	5.37053	19.6667	96.1211	23.2947	0.0138095	0.001132								64986-57	KLC-16-PV-2	37	2016-05-21	22.5667	3546715000		san	5	Karlstrom		129.138.12.160	7.875	Ar41 bk val,er = @ 6/21/16 9:23 AM; Average background @ 6/21/16 9:23 AM; Ar40 bk val,er = @ 6/21/16 9:23 AM; Linear @ 6/21/16 9:23 AM; Ar39 bk val,er = @ 6/21/16 9:23 AM; Average background @ 6/21/16 9:23 AM; Ar38 bk val,er = @ 6/21/16 9:23 AM; Average background @ 6/21/16 9:23 AM; Ar37 bk val,er = @ 6/21/16 9:23 AM; Average background @ 6/21/16 9:23 AM; Ar36 bk val,er = @ 6/21/16 9:23 AM; Linea…		APPLLPAAAAAA	1	Pychron Script	1	Fusions CO2	3	3	0	3	0	30	30	159			0
	104	3	3.43379	0.0261883	0.4888	2.22677	19.4821	95.8447	23.3674	0.0287601	0.001132								64986-104	KLC-16-PV-2	37	2016-05-22	9.28333	3546753000		san	5	Karlstrom		129.138.12.160	7.875	Ar41 bk val,er = @ 6/21/16 9:25 AM; Average background @ 6/21/16 9:25 AM; Ar40 bk val,er = @ 6/21/16 9:25 AM; Linear @ 6/21/16 9:25 AM; Ar39 bk val,er = @ 6/21/16 9:25 AM; Average background @ 6/21/16 9:25 AM; Ar38 bk val,er = @ 6/21/16 9:25 AM; Average background @ 6/21/16 9:25 AM; Ar37 bk val,er = @ 6/21/16 9:25 AM; Average background @ 6/21/16 9:25 AM; Ar36 bk val,er = @ 6/21/16 9:25 AM; Linea…		APPLLPAAAAAA	1	Pychron Script	1	Fusions CO2	3	3	0	3	0	30	30	206			0
	94	3	3.51843	0.012583	0.2222	3.0516	40.5471	98.1579	24.5147	0.0202689	0.001132								64986-94	KLC-16-PV-2	37	2016-05-22	7.13333	3546746000		san	5	Karlstrom		129.138.12.160	7.875	Ar41 bk val,er = @ 6/21/16 9:24 AM; Average background @ 6/21/16 9:24 AM; Ar40 bk val,er = @ 6/21/16 9:24 AM; Linear @ 6/21/16 9:24 AM; Ar39 bk val,er = @ 6/21/16 9:24 AM; Average background @ 6/21/16 9:24 AM; Ar38 bk val,er = @ 6/21/16 9:24 AM; Average background @ 6/21/16 9:24 AM; Ar37 bk val,er = @ 6/21/16 9:24 AM; Average background @ 6/21/16 9:24 AM; Ar36 bk val,er = @ 6/21/16 9:24 AM; Linea…		APPLLPAAAAAA	1	Pychron Script	1	Fusions CO2	3	3	0	3	0	30	30	196			0
	107	3	3.5122	0.0104918	0.1676	3.69785	48.6288	98.6106	24.5835	0.0169523	0.001132								64986-107	KLC-16-PV-2	37	2016-05-22	9.83333	3546755000		san	5	Karlstrom		129.138.12.160	7.875	Ar41 bk val,er = @ 6/21/16 9:25 AM; Average background @ 6/21/16 9:25 AM; Ar40 bk val,er = @ 6/21/16 9:25 AM; Linear @ 6/21/16 9:25 AM; Ar39 bk val,er = @ 6/21/16 9:25 AM; Average background @ 6/21/16 9:25 AM; Ar38 bk val,er = @ 6/21/16 9:25 AM; Average background @ 6/21/16 9:25 AM; Ar37 bk val,er = @ 6/21/16 9:25 AM; Average background @ 6/21/16 9:25 AM; Ar36 bk val,er = @ 6/21/16 9:25 AM; Linea…		APPLLPAAAAAA	1	Pychron Script	1	Fusions CO2	3	3	0	3	0	30	30	209			0
	83	3	3.55775	0.0143097	0.24	3.18517	35.6544	98.0342	24.7563	0.0195692	0.001132								64986-83	KLC-16-PV-2	37	2016-05-22	4.28333	3546735000		san	5	Karlstrom		129.138.12.160	7.875	Ar41 bk val,er = @ 6/21/16 9:24 AM; Average background @ 6/21/16 9:24 AM; Ar40 bk val,er = @ 6/21/16 9:24 AM; Linear @ 6/21/16 9:24 AM; Ar39 bk val,er = @ 6/21/16 9:24 AM; Average background @ 6/21/16 9:24 AM; Ar38 bk val,er = @ 6/21/16 9:24 AM; Average background @ 6/21/16 9:24 AM; Ar37 bk val,er = @ 6/21/16 9:24 AM; Average background @ 6/21/16 9:24 AM; Ar36 bk val,er = @ 6/21/16 9:24 AM; Linea…		APPLLPAAAAAA	1	Pychron Script	1	Fusions CO2	3	3	0	3	0	30	30	185			0
	59	3	3.67523	0.0086411	0.1557	2.74035	59.0439	98.7642	25.7588	0.0215882	0.001132								64986-59	KLC-16-PV-2	37	2016-05-21	22.8667	3546716000		san	5	Karlstrom		129.138.12.160	7.875	Ar41 bk val,er = @ 6/21/16 9:23 AM; Average background @ 6/21/16 9:23 AM; Ar40 bk val,er = @ 6/21/16 9:23 AM; Linear @ 6/21/16 9:23 AM; Ar39 bk val,er = @ 6/21/16 9:23 AM; Average background @ 6/21/16 9:23 AM; Ar38 bk val,er = @ 6/21/16 9:23 AM; Average background @ 6/21/16 9:23 AM; Ar37 bk val,er = @ 6/21/16 9:23 AM; Average background @ 6/21/16 9:23 AM; Ar36 bk val,er = @ 6/21/16 9:23 AM; Linea…		APPLLPAAAAAA	1	Pychron Script	1	Fusions CO2	3	3	0	3	0	30	30	161			0
	49	3	4.01846	0.0145335	0.5544	3.77023	35.1054	95.9439	27.3531	0.0192806	0.001132								64986-49	KLC-16-PV-2	37	2016-05-21	20.9333	3546709000		san	5	Karlstrom		129.138.12.160	7.875	Ar41 bk val,er = @ 6/21/16 9:23 AM; Average background @ 6/21/16 9:23 AM; Ar40 bk val,er = @ 6/21/16 9:23 AM; Linear @ 6/21/16 9:23 AM; Ar39 bk val,er = @ 6/21/16 9:23 AM; Average background @ 6/21/16 9:23 AM; Ar38 bk val,er = @ 6/21/16 9:23 AM; Average background @ 6/21/16 9:23 AM; Ar37 bk val,er = @ 6/21/16 9:23 AM; Average background @ 6/21/16 9:23 AM; Ar36 bk val,er = @ 6/21/16 9:23 AM; Linea…		APPLLPAAAAAA	1	Pychron Script	1	Fusions CO2	3	3	0	3	0	30	30	151			0
	52	3	4.11202	0.0208944	0.7901	2.07436	24.4182	94.3522	27.5256	0.0329748	0.001132								64986-52	KLC-16-PV-2	37	2016-05-21	21.3667	3546711000		san	5	Karlstrom		129.138.12.160	7.875	Ar41 bk val,er = @ 6/21/16 9:23 AM; Average background @ 6/21/16 9:23 AM; Ar40 bk val,er = @ 6/21/16 9:23 AM; Linear @ 6/21/16 9:23 AM; Ar39 bk val,er = @ 6/21/16 9:23 AM; Average background @ 6/21/16 9:23 AM; Ar38 bk val,er = @ 6/21/16 9:23 AM; Average background @ 6/21/16 9:23 AM; Ar37 bk val,er = @ 6/21/16 9:23 AM; Average background @ 6/21/16 9:23 AM; Ar36 bk val,er = @ 6/21/16 9:23 AM; Linea…		APPLLPAAAAAA	1	Pychron Script	1	Fusions CO2	3	3	0	3	0	30	30	154			0
	106	3	3.92796	0.0067892	0.142	3.75445	75.1494	98.9435	27.57	0.0164253	0.001132								64986-106	KLC-16-PV-2	37	2016-05-22	9.61667	3546755000		san	5	Karlstrom		129.138.12.160	7.875	Ar41 bk val,er = @ 6/21/16 9:25 AM; Average background @ 6/21/16 9:25 AM; Ar40 bk val,er = @ 6/21/16 9:25 AM; Linear @ 6/21/16 9:25 AM; Ar39 bk val,er = @ 6/21/16 9:25 AM; Average background @ 6/21/16 9:25 AM; Ar38 bk val,er = @ 6/21/16 9:25 AM; Average background @ 6/21/16 9:25 AM; Ar37 bk val,er = @ 6/21/16 9:25 AM; Average background @ 6/21/16 9:25 AM; Ar36 bk val,er = @ 6/21/16 9:25 AM; Linea…		APPLLPAAAAAA	1	Pychron Script	1	Fusions CO2	3	3	0	3	0	30	30	208			0
	75	3	4.05219	0.0109416	0.5483	4.29781	46.6297	96.0158	27.6019	0.0170515	0.001132								64986-75	KLC-16-PV-2	37	2016-05-22	2.43333	3546729000		san	5	Karlstrom		129.138.12.160	7.875	Ar41 bk val,er = @ 6/21/16 9:24 AM; Average background @ 6/21/16 9:24 AM; Ar40 bk val,er = @ 6/21/16 9:24 AM; Linear @ 6/21/16 9:24 AM; Ar39 bk val,er = @ 6/21/16 9:24 AM; Average background @ 6/21/16 9:24 AM; Ar38 bk val,er = @ 6/21/16 9:24 AM; Average background @ 6/21/16 9:24 AM; Ar37 bk val,er = @ 6/21/16 9:24 AM; Average background @ 6/21/16 9:24 AM; Ar36 bk val,er = @ 6/21/16 9:24 AM; Linea…		APPLLPAAAAAA	1	Pychron Script	1	Fusions CO2	3	3	0	3	0	30	30	177			0
	92	3	3.98201	0.0198761	0.3001	3.84115	25.6692	97.8087	27.6294	0.0171452	0.001132								64986-92	KLC-16-PV-2	37	2016-05-22	6.68333	3546744000		san	5	Karlstrom		129.138.12.160	7.875	Ar41 bk val,er = @ 6/21/16 9:24 AM; Average background @ 6/21/16 9:24 AM; Ar40 bk val,er = @ 6/21/16 9:24 AM; Linear @ 6/21/16 9:24 AM; Ar39 bk val,er = @ 6/21/16 9:24 AM; Average background @ 6/21/16 9:24 AM; Ar38 bk val,er = @ 6/21/16 9:24 AM; Average background @ 6/21/16 9:24 AM; Ar37 bk val,er = @ 6/21/16 9:24 AM; Average background @ 6/21/16 9:24 AM; Ar36 bk val,er = @ 6/21/16 9:24 AM; Linea…		APPLLPAAAAAA	1	Pychron Script	1	Fusions CO2	3	3	0	3	0	30	30	194			0
	100	3	4.01506	0.0101357	0.3791	1.11474	50.3373	97.2244	27.692	0.0526449	0.001132								64986-100	KLC-16-PV-2	37	2016-05-22	8.2	3546750000		san	5	Karlstrom		129.138.12.160	7.875	Ar41 bk val,er = @ 6/21/16 9:25 AM; Average background @ 6/21/16 9:25 AM; Ar40 bk val,er = @ 6/21/16 9:25 AM; Linear @ 6/21/16 9:25 AM; Ar39 bk val,er = @ 6/21/16 9:25 AM; Average background @ 6/21/16 9:25 AM; Ar38 bk val,er = @ 6/21/16 9:25 AM; Average background @ 6/21/16 9:25 AM; Ar37 bk val,er = @ 6/21/16 9:25 AM; Average background @ 6/21/16 9:25 AM; Ar36 bk val,er = @ 6/21/16 9:25 AM; Linea…		APPLLPAAAAAA	1	Pychron Script	1	Fusions CO2	3	3	0	3	0	30	30	202			0
	28	3	3.95555	0.008775	0.121	6.29589	58.1429	99.1121	27.8096	0.0103439	0.001132								64986-28	KLC-16-PV-2	37	2016-05-21	15.9333	3546691000		san	5	Karlstrom		129.138.12.160	7.875	Ar41 bk val,er = @ 6/21/16 9:23 AM; Average background @ 6/21/16 9:23 AM; Ar40 bk val,er = @ 6/21/16 9:23 AM; Linear @ 6/21/16 9:23 AM; Ar39 bk val,er = @ 6/21/16 9:23 AM; Average background @ 6/21/16 9:23 AM; Ar38 bk val,er = @ 6/21/16 9:23 AM; Average background @ 6/21/16 9:23 AM; Ar37 bk val,er = @ 6/21/16 9:23 AM; Average background @ 6/21/16 9:23 AM; Ar36 bk val,er = @ 6/21/16 9:23 AM; Linea…		APPLLPAAAAAA	1	Pychron Script	1	Fusions CO2	3	3	0	3	0	30	30	130			0
	31	3	4.20006	0.0078142	0.7836	2.95213	65.2919	94.4919	28.1525	0.0239742	0.001132								64986-31	KLC-16-PV-2	37	2016-05-21	16.4667	3546693000		san	5	Karlstrom		129.138.12.160	7.875	Ar41 bk val,er = @ 6/21/16 9:23 AM; Average background @ 6/21/16 9:23 AM; Ar40 bk val,er = @ 6/21/16 9:23 AM; Linear @ 6/21/16 9:23 AM; Ar39 bk val,er = @ 6/21/16 9:23 AM; Average background @ 6/21/16 9:23 AM; Ar38 bk val,er = @ 6/21/16 9:23 AM; Average background @ 6/21/16 9:23 AM; Ar37 bk val,er = @ 6/21/16 9:23 AM; Average background @ 6/21/16 9:23 AM; Ar36 bk val,er = @ 6/21/16 9:23 AM; Linea…		APPLLPAAAAAA	1	Pychron Script	1	Fusions CO2	3	3	0	3	0	30	30	133			0
	25	3	4.07674	0.0077017	0.341	4.47242	66.2456	97.5382	28.205	0.0151665	0.001132								64986-25	KLC-16-PV-2	37	2016-05-21	15.2833	3546689000		san	5	Karlstrom		129.138.12.160	7.875	Ar41 bk val,er = @ 6/21/16 9:23 AM; Average background @ 6/21/16 9:23 AM; Ar40 bk val,er = @ 6/21/16 9:23 AM; Linear @ 6/21/16 9:23 AM; Ar39 bk val,er = @ 6/21/16 9:23 AM; Average background @ 6/21/16 9:23 AM; Ar38 bk val,er = @ 6/21/16 9:23 AM; Average background @ 6/21/16 9:23 AM; Ar37 bk val,er = @ 6/21/16 9:23 AM; Average background @ 6/21/16 9:23 AM; Ar36 bk val,er = @ 6/21/16 9:23 AM; Linea…		APPLLPAAAAAA	1	Pychron Script	1	Fusions CO2	3	3	0	3	0	30	30	127			0
	34	3	4.32495	0.0085125	1.1672	6.26105	59.9359	92.0268	28.2342	0.0150905	0.001132								64986-34	KLC-16-PV-2	37	2016-05-21	17.2167	3546696000		san	5	Karlstrom		129.138.12.160	7.875	Ar41 bk val,er = @ 6/21/16 9:23 AM; Average background @ 6/21/16 9:23 AM; Ar40 bk val,er = @ 6/21/16 9:23 AM; Linear @ 6/21/16 9:23 AM; Ar39 bk val,er = @ 6/21/16 9:23 AM; Average background @ 6/21/16 9:23 AM; Ar38 bk val,er = @ 6/21/16 9:23 AM; Average background @ 6/21/16 9:23 AM; Ar37 bk val,er = @ 6/21/16 9:23 AM; Average background @ 6/21/16 9:23 AM; Ar36 bk val,er = @ 6/21/16 9:23 AM; Linea…		APPLLPAAAAAA	1	Pychron Script	1	Fusions CO2	3	3	0	3	0	30	30	136			0
	97	3	4.01671	0.0057299	0.1193	4.02725	89.0424	99.132	28.2426	0.0154236	0.001132								64986-97	KLC-16-PV-2	37	2016-05-22	7.53333	3546747000		san	5	Karlstrom		129.138.12.160	7.875	Ar41 bk val,er = @ 6/21/16 9:24 AM; Average background @ 6/21/16 9:24 AM; Ar40 bk val,er = @ 6/21/16 9:24 AM; Linear @ 6/21/16 9:24 AM; Ar39 bk val,er = @ 6/21/16 9:24 AM; Average background @ 6/21/16 9:24 AM; Ar38 bk val,er = @ 6/21/16 9:24 AM; Average background @ 6/21/16 9:24 AM; Ar37 bk val,er = @ 6/21/16 9:24 AM; Average background @ 6/21/16 9:24 AM; Ar36 bk val,er = @ 6/21/16 9:24 AM; Linea…		APPLLPAAAAAA	1	Pychron Script	1	Fusions CO2	3	3	0	3	0	30	30	199			0
	56	3	4.42233	0.0078622	1.4903	5.20927	64.8933	90.0388	28.2472	0.0198701	0.001132								64986-56	KLC-16-PV-2	37	2016-05-21	22.3333	3546714000		san	5	Karlstrom		129.138.12.160	7.875	Ar41 bk val,er = @ 6/21/16 9:23 AM; Average background @ 6/21/16 9:23 AM; Ar40 bk val,er = @ 6/21/16 9:23 AM; Linear @ 6/21/16 9:23 AM; Ar39 bk val,er = @ 6/21/16 9:23 AM; Average background @ 6/21/16 9:23 AM; Ar38 bk val,er = @ 6/21/16 9:23 AM; Average background @ 6/21/16 9:23 AM; Ar37 bk val,er = @ 6/21/16 9:23 AM; Average background @ 6/21/16 9:23 AM; Ar36 bk val,er = @ 6/21/16 9:23 AM; Linea…		APPLLPAAAAAA	1	Pychron Script	1	Fusions CO2	3	3	0	3	0	30	30	158			0
	22	3	4.13828	0.0087354	0.503	1.70814	58.4065	96.4181	28.302	0.0361499	0.001132								64986-22	KLC-16-PV-2	37	2016-05-21	14.6167	3546686000		san	5	Karlstrom		129.138.12.160	7.875	Ar41 bk val,er = @ 6/21/16 9:23 AM; Average background @ 6/21/16 9:23 AM; Ar40 bk val,er = @ 6/21/16 9:23 AM; Linear @ 6/21/16 9:23 AM; Ar39 bk val,er = @ 6/21/16 9:23 AM; Average background @ 6/21/16 9:23 AM; Ar38 bk val,er = @ 6/21/16 9:23 AM; Average background @ 6/21/16 9:23 AM; Ar37 bk val,er = @ 6/21/16 9:23 AM; Average background @ 6/21/16 9:23 AM; Ar36 bk val,er = @ 6/21/16 9:23 AM; Linea…		APPLLPAAAAAA	1	Pychron Script	1	Fusions CO2	3	3	0	3	0	30	30	124			0
	63	3	4.20725	0.0208248	0.5779	4.8931	24.4998	95.9733	28.6394	0.0160973	0.001132								64986-63	KLC-16-PV-2	37	2016-05-21	23.75	3546719000		san	5	Karlstrom		129.138.12.160	7.875	Ar41 bk val,er = @ 6/21/16 9:24 AM; Average background @ 6/21/16 9:24 AM; Ar40 bk val,er = @ 6/21/16 9:24 AM; Linear @ 6/21/16 9:24 AM; Ar39 bk val,er = @ 6/21/16 9:24 AM; Average background @ 6/21/16 9:24 AM; Ar38 bk val,er = @ 6/21/16 9:24 AM; Average background @ 6/21/16 9:24 AM; Ar37 bk val,er = @ 6/21/16 9:24 AM; Average background @ 6/21/16 9:24 AM; Ar36 bk val,er = @ 6/21/16 9:24 AM; Linea…		APPLLPAAAAAA	1	Pychron Script	1	Fusions CO2	3	3	0	3	0	30	30	165			0
	60	3	4.1757	0.014343	0.4318	2.39158	35.5716	96.9662	28.7175	0.0267837	0.001132								64986-60	KLC-16-PV-2	37	2016-05-21	23.1	3546717000		san	5	Karlstrom		129.138.12.160	7.875	Ar41 bk val,er = @ 6/21/16 9:24 AM; Average background @ 6/21/16 9:24 AM; Ar40 bk val,er = @ 6/21/16 9:24 AM; Linear @ 6/21/16 9:24 AM; Ar39 bk val,er = @ 6/21/16 9:24 AM; Average background @ 6/21/16 9:24 AM; Ar38 bk val,er = @ 6/21/16 9:24 AM; Average background @ 6/21/16 9:24 AM; Ar37 bk val,er = @ 6/21/16 9:24 AM; Average background @ 6/21/16 9:24 AM; Ar36 bk val,er = @ 6/21/16 9:24 AM; Linea…		APPLLPAAAAAA	1	Pychron Script	1	Fusions CO2	3	3	0	3	0	30	30	162			0
	23	3	4.35742	0.0148203	0.7869	3.20927	34.426	94.6817	29.2591	0.0220851	0.001132								64986-23	KLC-16-PV-2	37	2016-05-21	14.8333	3546687000		san	5	Karlstrom		129.138.12.160	7.875	Ar41 bk val,er = @ 6/21/16 9:23 AM; Average background @ 6/21/16 9:23 AM; Ar40 bk val,er = @ 6/21/16 9:23 AM; Linear @ 6/21/16 9:23 AM; Ar39 bk val,er = @ 6/21/16 9:23 AM; Average background @ 6/21/16 9:23 AM; Ar38 bk val,er = @ 6/21/16 9:23 AM; Average background @ 6/21/16 9:23 AM; Ar37 bk val,er = @ 6/21/16 9:23 AM; Average background @ 6/21/16 9:23 AM; Ar36 bk val,er = @ 6/21/16 9:23 AM; Linea…		APPLLPAAAAAA	1	Pychron Script	1	Fusions CO2	3	3	0	3	0	30	30	125			0
	18	3	4.7281	0.00791	0.5242	3.97175	64.5011	96.7319	32.4118	0.0184457	0.001132								64986-18	KLC-16-PV-2	37	2016-05-21	12.8333	3546680000		san	5	Karlstrom		129.138.12.160	7.875	Ar41 bk val,er = @ 6/21/16 9:23 AM; Average background @ 6/21/16 9:23 AM; Ar40 bk val,er = @ 6/21/16 9:23 AM; Linear @ 6/21/16 9:23 AM; Ar39 bk val,er = @ 6/21/16 9:23 AM; Average background @ 6/21/16 9:23 AM; Ar38 bk val,er = @ 6/21/16 9:23 AM; Average background @ 6/21/16 9:23 AM; Ar37 bk val,er = @ 6/21/16 9:23 AM; Average background @ 6/21/16 9:23 AM; Ar36 bk val,er = @ 6/21/16 9:23 AM; Linea…		APPLLPAAAAAA	1	Pychron Script	1	Fusions CO2	3	3	0	3	0	30	30	120			0
	64	3	4.81873	0.0153828	0.7683	1.68242	33.1672	95.3067	32.5463	0.0392107	0.001132								64986-64	KLC-16-PV-2	37	2016-05-21	23.9667	3546720000		san	5	Karlstrom		129.138.12.160	7.875	Ar41 bk val,er = @ 6/21/16 9:24 AM; Average background @ 6/21/16 9:24 AM; Ar40 bk val,er = @ 6/21/16 9:24 AM; Linear @ 6/21/16 9:24 AM; Ar39 bk val,er = @ 6/21/16 9:24 AM; Average background @ 6/21/16 9:24 AM; Ar38 bk val,er = @ 6/21/16 9:24 AM; Average background @ 6/21/16 9:24 AM; Ar37 bk val,er = @ 6/21/16 9:24 AM; Average background @ 6/21/16 9:24 AM; Ar36 bk val,er = @ 6/21/16 9:24 AM; Linea…		APPLLPAAAAAA	1	Pychron Script	1	Fusions CO2	3	3	0	3	0	30	30	166			0
	81	3	4.70075	0.0044085	0.1398	4.99854	115.732	99.1268	33.0162	0.0130782	0.001132								64986-81	KLC-16-PV-2	37	2016-05-22	3.83333	3546734000		san	5	Karlstrom		129.138.12.160	7.875	Ar41 bk val,er = @ 6/21/16 9:24 AM; Average background @ 6/21/16 9:24 AM; Ar40 bk val,er = @ 6/21/16 9:24 AM; Linear @ 6/21/16 9:24 AM; Ar39 bk val,er = @ 6/21/16 9:24 AM; Average background @ 6/21/16 9:24 AM; Ar38 bk val,er = @ 6/21/16 9:24 AM; Average background @ 6/21/16 9:24 AM; Ar37 bk val,er = @ 6/21/16 9:24 AM; Average background @ 6/21/16 9:24 AM; Ar36 bk val,er = @ 6/21/16 9:24 AM; Linea…		APPLLPAAAAAA	1	Pychron Script	1	Fusions CO2	3	3	0	3	0	30	30	183			0
	47	3	5.50045	0.0146137	2.407	7.37923	34.9127	87.0724	33.9346	0.0198717	0.001132								64986-47	KLC-16-PV-2	37	2016-05-21	20.5	3546707000		san	5	Karlstrom		129.138.12.160	7.875	Ar41 bk val,er = @ 6/21/16 9:23 AM; Average background @ 6/21/16 9:23 AM; Ar40 bk val,er = @ 6/21/16 9:23 AM; Linear @ 6/21/16 9:23 AM; Ar39 bk val,er = @ 6/21/16 9:23 AM; Average background @ 6/21/16 9:23 AM; Ar38 bk val,er = @ 6/21/16 9:23 AM; Average background @ 6/21/16 9:23 AM; Ar37 bk val,er = @ 6/21/16 9:23 AM; Average background @ 6/21/16 9:23 AM; Ar36 bk val,er = @ 6/21/16 9:23 AM; Linea…		APPLLPAAAAAA	1	Pychron Script	1	Fusions CO2	3	3	0	3	0	30	30	149			0
	88	3	6.12474	0.0245673	4.4336	1.07636	20.7676	78.6152	34.1192	0.0813775	0.001132								64986-88	KLC-16-PV-2	37	2016-05-22	5.13333	3546738000		san	5	Karlstrom		129.138.12.160	7.875	Ar41 bk val,er = @ 6/21/16 9:24 AM; Average background @ 6/21/16 9:24 AM; Ar40 bk val,er = @ 6/21/16 9:24 AM; Linear @ 6/21/16 9:24 AM; Ar39 bk val,er = @ 6/21/16 9:24 AM; Average background @ 6/21/16 9:24 AM; Ar38 bk val,er = @ 6/21/16 9:24 AM; Average background @ 6/21/16 9:24 AM; Ar37 bk val,er = @ 6/21/16 9:24 AM; Average background @ 6/21/16 9:24 AM; Ar36 bk val,er = @ 6/21/16 9:24 AM; Linea…		APPLLPAAAAAA	1	Pychron Script	1	Fusions CO2	3	3	0	3	0	30	30	190			0
	103	3	5.03214	0.0055118	0.4366	4.46802	92.5658	97.4411	34.7301	0.0165398	0.001132								64986-103	KLC-16-PV-2	37	2016-05-22	8.85	3546752000		san	5	Karlstrom		129.138.12.160	7.875	Ar41 bk val,er = @ 6/21/16 9:25 AM; Average background @ 6/21/16 9:25 AM; Ar40 bk val,er = @ 6/21/16 9:25 AM; Linear @ 6/21/16 9:25 AM; Ar39 bk val,er = @ 6/21/16 9:25 AM; Average background @ 6/21/16 9:25 AM; Ar38 bk val,er = @ 6/21/16 9:25 AM; Average background @ 6/21/16 9:25 AM; Ar37 bk val,er = @ 6/21/16 9:25 AM; Average background @ 6/21/16 9:25 AM; Ar36 bk val,er = @ 6/21/16 9:25 AM; Linea…		APPLLPAAAAAA	1	Pychron Script	1	Fusions CO2	3	3	0	3	0	30	30	205			0
	27	3	5.0219	0.0062058	0.3869	5.85498	82.2141	97.7293	34.7616	0.0130358	0.001132								64986-27	KLC-16-PV-2	37	2016-05-21	15.7167	3546690000		san	5	Karlstrom		129.138.12.160	7.875	Ar41 bk val,er = @ 6/21/16 9:23 AM; Average background @ 6/21/16 9:23 AM; Ar40 bk val,er = @ 6/21/16 9:23 AM; Linear @ 6/21/16 9:23 AM; Ar39 bk val,er = @ 6/21/16 9:23 AM; Average background @ 6/21/16 9:23 AM; Ar38 bk val,er = @ 6/21/16 9:23 AM; Average background @ 6/21/16 9:23 AM; Ar37 bk val,er = @ 6/21/16 9:23 AM; Average background @ 6/21/16 9:23 AM; Ar36 bk val,er = @ 6/21/16 9:23 AM; Linea…		APPLLPAAAAAA	1	Pychron Script	1	Fusions CO2	3	3	0	3	0	30	30	129			0
	93	3	5.19163	0.0086612	0.6797	3.30892	58.9068	96.1388	35.3477	0.0225957	0.001132								64986-93	KLC-16-PV-2	37	2016-05-22	6.9	3546745000		san	5	Karlstrom		129.138.12.160	7.875	Ar41 bk val,er = @ 6/21/16 9:24 AM; Average background @ 6/21/16 9:24 AM; Ar40 bk val,er = @ 6/21/16 9:24 AM; Linear @ 6/21/16 9:24 AM; Ar39 bk val,er = @ 6/21/16 9:24 AM; Average background @ 6/21/16 9:24 AM; Ar38 bk val,er = @ 6/21/16 9:24 AM; Average background @ 6/21/16 9:24 AM; Ar37 bk val,er = @ 6/21/16 9:24 AM; Average background @ 6/21/16 9:24 AM; Ar36 bk val,er = @ 6/21/16 9:24 AM; Linea…		APPLLPAAAAAA	1	Pychron Script	1	Fusions CO2	3	3	0	3	0	30	30	195			0
	98	3	5.5203	0.0042615	0.2392	4.80843	119.724	98.7236	38.5652	0.0148358	0.001132								64986-98	KLC-16-PV-2	37	2016-05-22	7.76667	3546748000		san	5	Karlstrom		129.138.12.160	7.875	Ar41 bk val,er = @ 6/21/16 9:25 AM; Average background @ 6/21/16 9:25 AM; Ar40 bk val,er = @ 6/21/16 9:25 AM; Linear @ 6/21/16 9:25 AM; Ar39 bk val,er = @ 6/21/16 9:25 AM; Average background @ 6/21/16 9:25 AM; Ar38 bk val,er = @ 6/21/16 9:25 AM; Average background @ 6/21/16 9:25 AM; Ar37 bk val,er = @ 6/21/16 9:25 AM; Average background @ 6/21/16 9:25 AM; Ar36 bk val,er = @ 6/21/16 9:25 AM; Linea…		APPLLPAAAAAA	1	Pychron Script	1	Fusions CO2	3	3	0	3	0	30	30	200			0
	87	3	7.43028	0.0104236	2.004	5.73086	48.947	92.0333	48.2789	0.0223086	0.001132								64986-87	KLC-16-PV-2	37	2016-05-22	4.9	3546738000		san	5	Karlstrom		129.138.12.160	7.875	Ar41 bk val,er = @ 6/21/16 9:24 AM; Average background @ 6/21/16 9:24 AM; Ar40 bk val,er = @ 6/21/16 9:24 AM; Linear @ 6/21/16 9:24 AM; Ar39 bk val,er = @ 6/21/16 9:24 AM; Average background @ 6/21/16 9:24 AM; Ar38 bk val,er = @ 6/21/16 9:24 AM; Average background @ 6/21/16 9:24 AM; Ar37 bk val,er = @ 6/21/16 9:24 AM; Average background @ 6/21/16 9:24 AM; Ar36 bk val,er = @ 6/21/16 9:24 AM; Linea…		APPLLPAAAAAA	1	Pychron Script	1	Fusions CO2	3	3	0	3	0	30	30	189			0
	99	3	9.18251	0.0011566	5.0546	2.18541	441.124	83.7219	54.1978	0.055651	0.001132								64986-99	KLC-16-PV-2	37	2016-05-22	7.98333	3546749000		san	5	Karlstrom		129.138.12.160	7.875	Ar41 bk val,er = @ 6/21/16 9:25 AM; Average background @ 6/21/16 9:25 AM; Ar40 bk val,er = @ 6/21/16 9:25 AM; Linear @ 6/21/16 9:25 AM; Ar39 bk val,er = @ 6/21/16 9:25 AM; Average background @ 6/21/16 9:25 AM; Ar38 bk val,er = @ 6/21/16 9:25 AM; Average background @ 6/21/16 9:25 AM; Ar37 bk val,er = @ 6/21/16 9:25 AM; Average background @ 6/21/16 9:25 AM; Ar36 bk val,er = @ 6/21/16 9:25 AM; Linea…		APPLLPAAAAAA	1	Pychron Script	1	Fusions CO2	3	3	0	3	0	30	30	201			0
	91	3	32.7637	0.0253794	3.1019	0.499395	20.1031	97.208	214.902	0.612861	0.001132								64986-91	KLC-16-PV-2	37	2016-05-22	5.43333	3546740000		san	5	Karlstrom		129.138.12.160	7.875	Ar41 bk val,er = @ 6/21/16 9:24 AM; Average background @ 6/21/16 9:24 AM; Ar40 bk val,er = @ 6/21/16 9:24 AM; Linear @ 6/21/16 9:24 AM; Ar39 bk val,er = @ 6/21/16 9:24 AM; Average background @ 6/21/16 9:24 AM; Ar38 bk val,er = @ 6/21/16 9:24 AM; Average background @ 6/21/16 9:24 AM; Ar37 bk val,er = @ 6/21/16 9:24 AM; Average background @ 6/21/16 9:24 AM; Ar36 bk val,er = @ 6/21/16 9:24 AM; Linea…		ALLLLLAAAAAA	1	Pychron Script	1	Fusions CO2	3	3	0	3	0	30	30	193			0
	38	3	32.2386	0.0059561	0.0426	5.4005	85.6608	99.9624	217.3	0.076139	0.001132								64986-38	KLC-16-PV-2	37	2016-05-21	17.9667	3546698000		san	5	Karlstrom		129.138.12.160	7.875	Ar41 bk val,er = @ 6/21/16 9:23 AM; Average background @ 6/21/16 9:23 AM; Ar40 bk val,er = @ 6/21/16 9:23 AM; Linear @ 6/21/16 9:23 AM; Ar39 bk val,er = @ 6/21/16 9:23 AM; Average background @ 6/21/16 9:23 AM; Ar38 bk val,er = @ 6/21/16 9:23 AM; Average background @ 6/21/16 9:23 AM; Ar37 bk val,er = @ 6/21/16 9:23 AM; Average background @ 6/21/16 9:23 AM; Ar36 bk val,er = @ 6/21/16 9:23 AM; Linea…		ALLLLLAAAAAA	1	Pychron Script	1	Fusions CO2	3	3	0	3	0	30	30	140			0
	85	3	34.8542	0.0055218	3.1252	5.23359	92.3981	97.3512	228.109	0.11297	0.001132								64986-85	KLC-16-PV-2	37	2016-05-22	4.46667	3546736000		san	5	Karlstrom		129.138.12.160	7.875	Ar41 bk val,er = @ 6/21/16 9:24 AM; Average background @ 6/21/16 9:24 AM; Ar40 bk val,er = @ 6/21/16 9:24 AM; Linear @ 6/21/16 9:24 AM; Ar39 bk val,er = @ 6/21/16 9:24 AM; Average background @ 6/21/16 9:24 AM; Ar38 bk val,er = @ 6/21/16 9:24 AM; Average background @ 6/21/16 9:24 AM; Ar37 bk val,er = @ 6/21/16 9:24 AM; Average background @ 6/21/16 9:24 AM; Ar36 bk val,er = @ 6/21/16 9:24 AM; Linea…		ALLLLLAAAAAA	1	Pychron Script	1	Fusions CO2	3	3	0	3	0	30	30	187			0
	108	3	95.4347	0.0159902	0.7286	1.6955	31.9073	99.7757	579.581	0.418973	0.001132								64986-108	KLC-16-PV-2	37	2016-05-22	9.95	3546756000		san	5	Karlstrom		129.138.12.160	7.875	Ar41 bk val,er = @ 6/21/16 9:25 AM; Average background @ 6/21/16 9:25 AM; Ar40 bk val,er = @ 6/21/16 9:25 AM; Linear @ 6/21/16 9:25 AM; Ar39 bk val,er = @ 6/21/16 9:25 AM; Average background @ 6/21/16 9:25 AM; Ar38 bk val,er = @ 6/21/16 9:25 AM; Average background @ 6/21/16 9:25 AM; Ar37 bk val,er = @ 6/21/16 9:25 AM; Average background @ 6/21/16 9:25 AM; Ar36 bk val,er = @ 6/21/16 9:25 AM; Linea…		ALLLLLAAAAAA	1	Pychron Script	1	Fusions CO2	3	3	0	3	0	30	30	210			0
	105	3	120.446	0.0012795	1.8769	1.25237	398.753	99.5396	703.976	0.5221	0.001132								64986-105	KLC-16-PV-2	37	2016-05-22	9.4	3546754000		san	5	Karlstrom		129.138.12.160	7.875	Ar41 bk val,er = @ 6/21/16 9:25 AM; Average background @ 6/21/16 9:25 AM; Ar40 bk val,er = @ 6/21/16 9:25 AM; Linear @ 6/21/16 9:25 AM; Ar39 bk val,er = @ 6/21/16 9:25 AM; Average background @ 6/21/16 9:25 AM; Ar38 bk val,er = @ 6/21/16 9:25 AM; Average background @ 6/21/16 9:25 AM; Ar37 bk val,er = @ 6/21/16 9:25 AM; Average background @ 6/21/16 9:25 AM; Ar36 bk val,er = @ 6/21/16 9:25 AM; Linea…		ALLLLLAAAAAA	1	Pychron Script	1	Fusions CO2	3	3	0	3	0	30	30	207			0
	46	3	120.313	0.0090755	0.444	0.262382	56.2177	99.8916	705.397	4.25015	0.001132								64986-46	KLC-16-PV-2	37	2016-05-21	20.2833	3546707000		san	5	Karlstrom		129.138.12.160	7.875	Ar41 bk val,er = @ 6/21/16 9:23 AM; Average background @ 6/21/16 9:23 AM; Ar40 bk val,er = @ 6/21/16 9:23 AM; Linear @ 6/21/16 9:23 AM; Ar39 bk val,er = @ 6/21/16 9:23 AM; Average background @ 6/21/16 9:23 AM; Ar38 bk val,er = @ 6/21/16 9:23 AM; Average background @ 6/21/16 9:23 AM; Ar37 bk val,er = @ 6/21/16 9:23 AM; Average background @ 6/21/16 9:23 AM; Ar36 bk val,er = @ 6/21/16 9:23 AM; Linea…		APPLLPAAAAAA	1	Pychron Script	1	Fusions CO2	3	3	0	3	0	30	30	148			0
	96	3	141.703	-0.0052114	0.937	0.191002	-	99.8044	806.049	3.4582	0.001132								64986-96	KLC-16-PV-2	37	2016-05-22	7.31667	3546746000		san	5	Karlstrom		129.138.12.160	7.875	Ar41 bk val,er = @ 6/21/16 9:24 AM; Average background @ 6/21/16 9:24 AM; Ar40 bk val,er = @ 6/21/16 9:24 AM; Linear @ 6/21/16 9:24 AM; Ar39 bk val,er = @ 6/21/16 9:24 AM; Average background @ 6/21/16 9:24 AM; Ar38 bk val,er = @ 6/21/16 9:24 AM; Average background @ 6/21/16 9:24 AM; Ar37 bk val,er = @ 6/21/16 9:24 AM; Average background @ 6/21/16 9:24 AM; Ar36 bk val,er = @ 6/21/16 9:24 AM; Linea…		ALLLLLAAAAAA	1	Pychron Script	1	Fusions CO2	3	3	0	3	0	30	30	198			0
	66	3	146.636	0.016371	-0.3515	0.219519	31.1651	100.072	830.399	2.86466	0.001132								64986-66	KLC-16-PV-2	37	2016-05-22	0.15	3546721000		san	5	Karlstrom		129.138.12.160	7.875	Ar41 bk val,er = @ 6/21/16 9:24 AM; Average background @ 6/21/16 9:24 AM; Ar40 bk val,er = @ 6/21/16 9:24 AM; Linear @ 6/21/16 9:24 AM; Ar39 bk val,er = @ 6/21/16 9:24 AM; Average background @ 6/21/16 9:24 AM; Ar38 bk val,er = @ 6/21/16 9:24 AM; Average background @ 6/21/16 9:24 AM; Ar37 bk val,er = @ 6/21/16 9:24 AM; Average background @ 6/21/16 9:24 AM; Ar36 bk val,er = @ 6/21/16 9:24 AM; Linea…		ALLLLLAAAAAA	1	Pychron Script	1	Fusions CO2	3	3	0	3	0	30	30	168			0
	109	3	148.122	-0.0002624	0.8372	1.21844	-	99.833	835.544	0.734557	0.001132								64986-109	KLC-16-PV-2	37	2016-05-22	10.05	3546756000		san	5	Karlstrom		129.138.12.160	7.875	Ar41 bk val,er = @ 6/21/16 9:25 AM; Average background @ 6/21/16 9:25 AM; Ar40 bk val,er = @ 6/21/16 9:25 AM; Linear @ 6/21/16 9:25 AM; Ar39 bk val,er = @ 6/21/16 9:25 AM; Average background @ 6/21/16 9:25 AM; Ar38 bk val,er = @ 6/21/16 9:25 AM; Average background @ 6/21/16 9:25 AM; Ar37 bk val,er = @ 6/21/16 9:25 AM; Average background @ 6/21/16 9:25 AM; Ar36 bk val,er = @ 6/21/16 9:25 AM; Linea…		ALLLLLAAAAAA	1	Pychron Script	1	Fusions CO2	3	3	0	3	0	30	30	211			0
	67	3	151.849	-0.0083058	0.523	0.444922	-	99.8978	852.783	1.41773	0.001132								64986-67	KLC-16-PV-2	37	2016-05-22	0.25	3546721000		san	5	Karlstrom		129.138.12.160	7.875	Ar41 bk val,er = @ 6/21/16 9:24 AM; Average background @ 6/21/16 9:24 AM; Ar40 bk val,er = @ 6/21/16 9:24 AM; Linear @ 6/21/16 9:24 AM; Ar39 bk val,er = @ 6/21/16 9:24 AM; Average background @ 6/21/16 9:24 AM; Ar38 bk val,er = @ 6/21/16 9:24 AM; Average background @ 6/21/16 9:24 AM; Ar37 bk val,er = @ 6/21/16 9:24 AM; Average background @ 6/21/16 9:24 AM; Ar36 bk val,er = @ 6/21/16 9:24 AM; Linea…		ALLLLLAAAAAA	1	Pychron Script	1	Fusions CO2	3	3	0	3	0	30	30	169			0
	65	3	155.088	-0.0173552	-0.3982	0.221995	-	100.075	868.489	2.59832	0.001132								64986-65	KLC-16-PV-2	37	2016-05-22	0.0666667	3546720000		san	5	Karlstrom		129.138.12.160	7.875	Ar41 bk val,er = @ 6/21/16 9:24 AM; Average background @ 6/21/16 9:24 AM; Ar40 bk val,er = @ 6/21/16 9:24 AM; Linear @ 6/21/16 9:24 AM; Ar39 bk val,er = @ 6/21/16 9:24 AM; Average background @ 6/21/16 9:24 AM; Ar38 bk val,er = @ 6/21/16 9:24 AM; Average background @ 6/21/16 9:24 AM; Ar37 bk val,er = @ 6/21/16 9:24 AM; Average background @ 6/21/16 9:24 AM; Ar36 bk val,er = @ 6/21/16 9:24 AM; Linea…		ALLLLLAAAAAA	1	Pychron Script	1	Fusions CO2	3	3	0	3	0	30	30	167			0
	54	3	157.842	-0.0002191	1.2023	1.14715	-	99.7749	878.638	0.764949	0.001132								64986-54	KLC-16-PV-2	37	2016-05-21	21.6833	3546712000		san	5	Karlstrom		129.138.12.160	7.875	Ar41 bk val,er = @ 6/21/16 9:23 AM; Average background @ 6/21/16 9:23 AM; Ar40 bk val,er = @ 6/21/16 9:23 AM; Linear @ 6/21/16 9:23 AM; Ar39 bk val,er = @ 6/21/16 9:23 AM; Average background @ 6/21/16 9:23 AM; Ar38 bk val,er = @ 6/21/16 9:23 AM; Average background @ 6/21/16 9:23 AM; Ar37 bk val,er = @ 6/21/16 9:23 AM; Average background @ 6/21/16 9:23 AM; Ar36 bk val,er = @ 6/21/16 9:23 AM; Linea…		ALLLLLAAAAAA	1	Pychron Script	1	Fusions CO2	3	3	0	3	0	30	30	156			0
	70	3	163.359	0.0254382	0.4261	0.199062	20.0566	99.9242	903.949	4.02514	0.001132								64986-70	KLC-16-PV-2	37	2016-05-22	1.56667	3546726000		san	5	Karlstrom		129.138.12.160	7.875	Ar41 bk val,er = @ 6/21/16 9:24 AM; Average background @ 6/21/16 9:24 AM; Ar40 bk val,er = @ 6/21/16 9:24 AM; Linear @ 6/21/16 9:24 AM; Ar39 bk val,er = @ 6/21/16 9:24 AM; Average background @ 6/21/16 9:24 AM; Ar38 bk val,er = @ 6/21/16 9:24 AM; Average background @ 6/21/16 9:24 AM; Ar37 bk val,er = @ 6/21/16 9:24 AM; Average background @ 6/21/16 9:24 AM; Ar36 bk val,er = @ 6/21/16 9:24 AM; Linea…		ALLLLLAAAAAA	1	Pychron Script	1	Fusions CO2	3	3	0	3	0	30	30	172			0
	50	3	173.088	-0.0035227	1.8307	1.1118	-	99.6873	944.182	1.01822	0.001132								64986-50	KLC-16-PV-2	37	2016-05-21	21.05	3546709000		san	5	Karlstrom		129.138.12.160	7.875	Ar41 bk val,er = @ 6/21/16 9:23 AM; Average background @ 6/21/16 9:23 AM; Ar40 bk val,er = @ 6/21/16 9:23 AM; Linear @ 6/21/16 9:23 AM; Ar39 bk val,er = @ 6/21/16 9:23 AM; Average background @ 6/21/16 9:23 AM; Ar38 bk val,er = @ 6/21/16 9:23 AM; Average background @ 6/21/16 9:23 AM; Ar37 bk val,er = @ 6/21/16 9:23 AM; Average background @ 6/21/16 9:23 AM; Ar36 bk val,er = @ 6/21/16 9:23 AM; Linea…		ALLLLLAAAAAA	1	Pychron Script	1	Fusions CO2	3	3	0	3	0	30	30	152			0
[truncated: 809 more rows]
[truncated: 142 more columns]

## Sheet: raw data
				Argon intensities (fA) ±1s										Detector calibration		Blank values (fA) ±1s										% radiogenic		Age data							Isotope decay factors		Interferring reaction correction factors
[truncated: 1,261 more rows]
[truncated: 4 more columns]

## Sheet: G48080
Crow, R.S., et al., 2021, Redefining the age of the lower Colorado River, southwestern United States: Geology, v. 49, https://doi.org/10.1130/G48080.1
